# Supplementary material for: Desymmetrization of cyclic olefins via asymmetric Heck reaction and hydroarylation
Source: Royal Society of Chemistry journal article supplement (doi:10.1039/c3cc47551d), 2013-01-01

## **Desymmetrization of Cyclic Olefins via Asymmetric Heck Reaction and Hydroarylation**

Sijia Liu and Jianrong (Steve) Zhou\*

*Division of Chemistry and Biological Chemistry, School of Physical and Mathematical Sciences, Nanyang Technological University,*

*21 Nanyang Link, Singapore 637371*

*E-mail: jrzhou@ntu.edu.sg*

Supporting Information: NMR Spectra

- I: Preparation of substrates
- II: Asymmetric Heck products
- III: Products derivatization
- IV: Asymmetric hydroarylation products

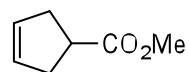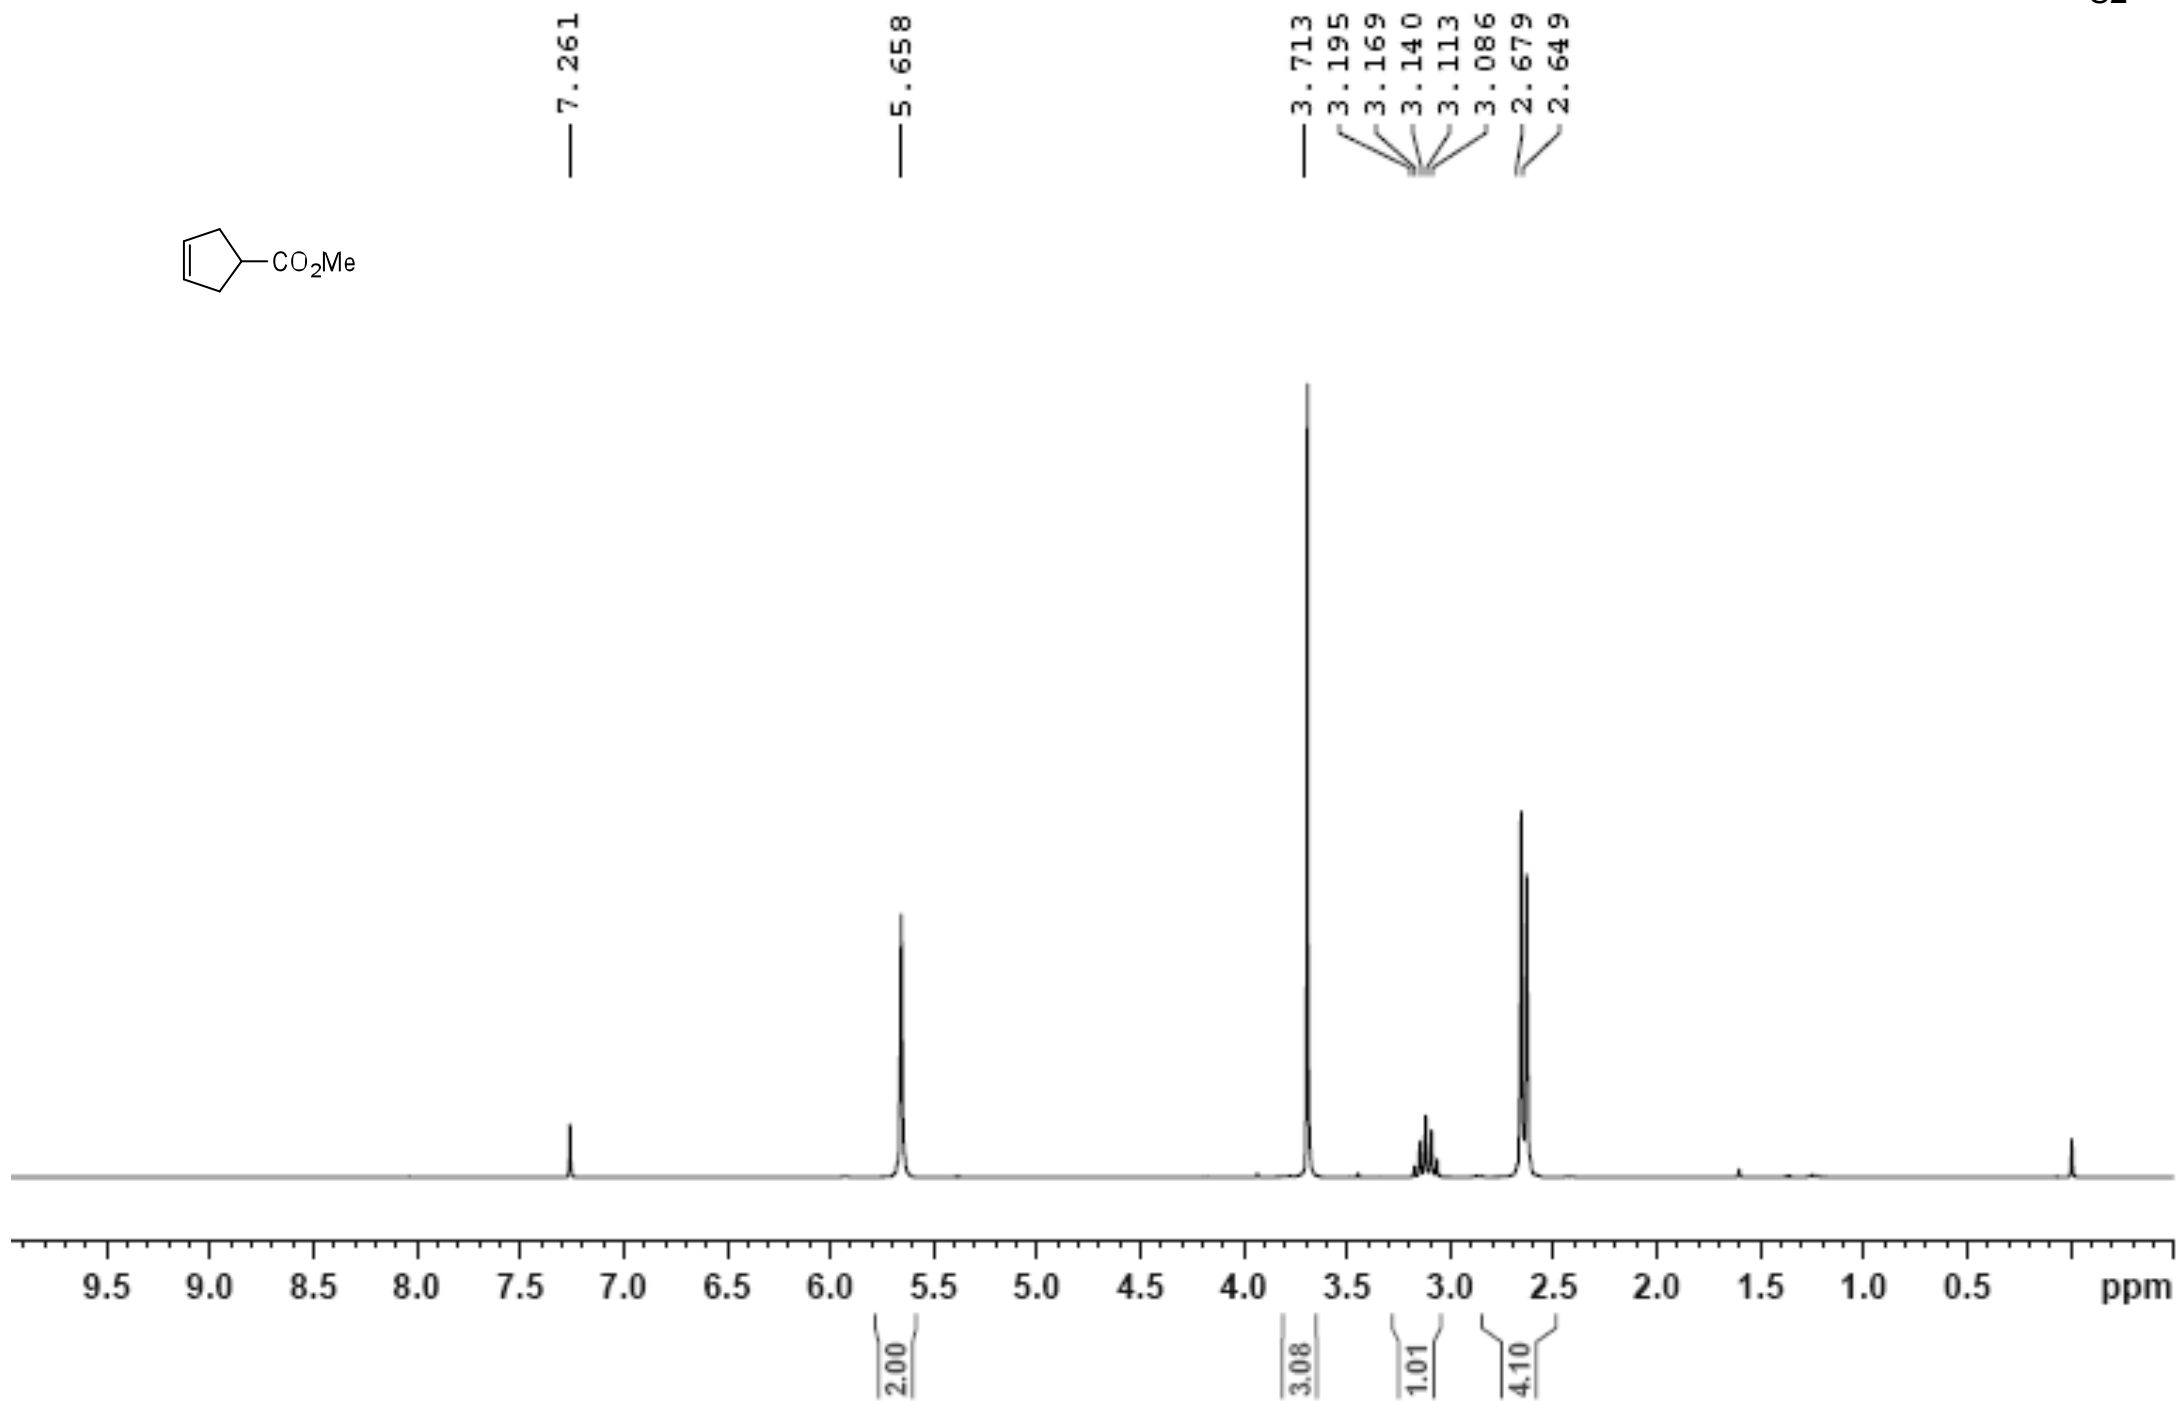

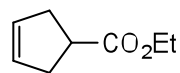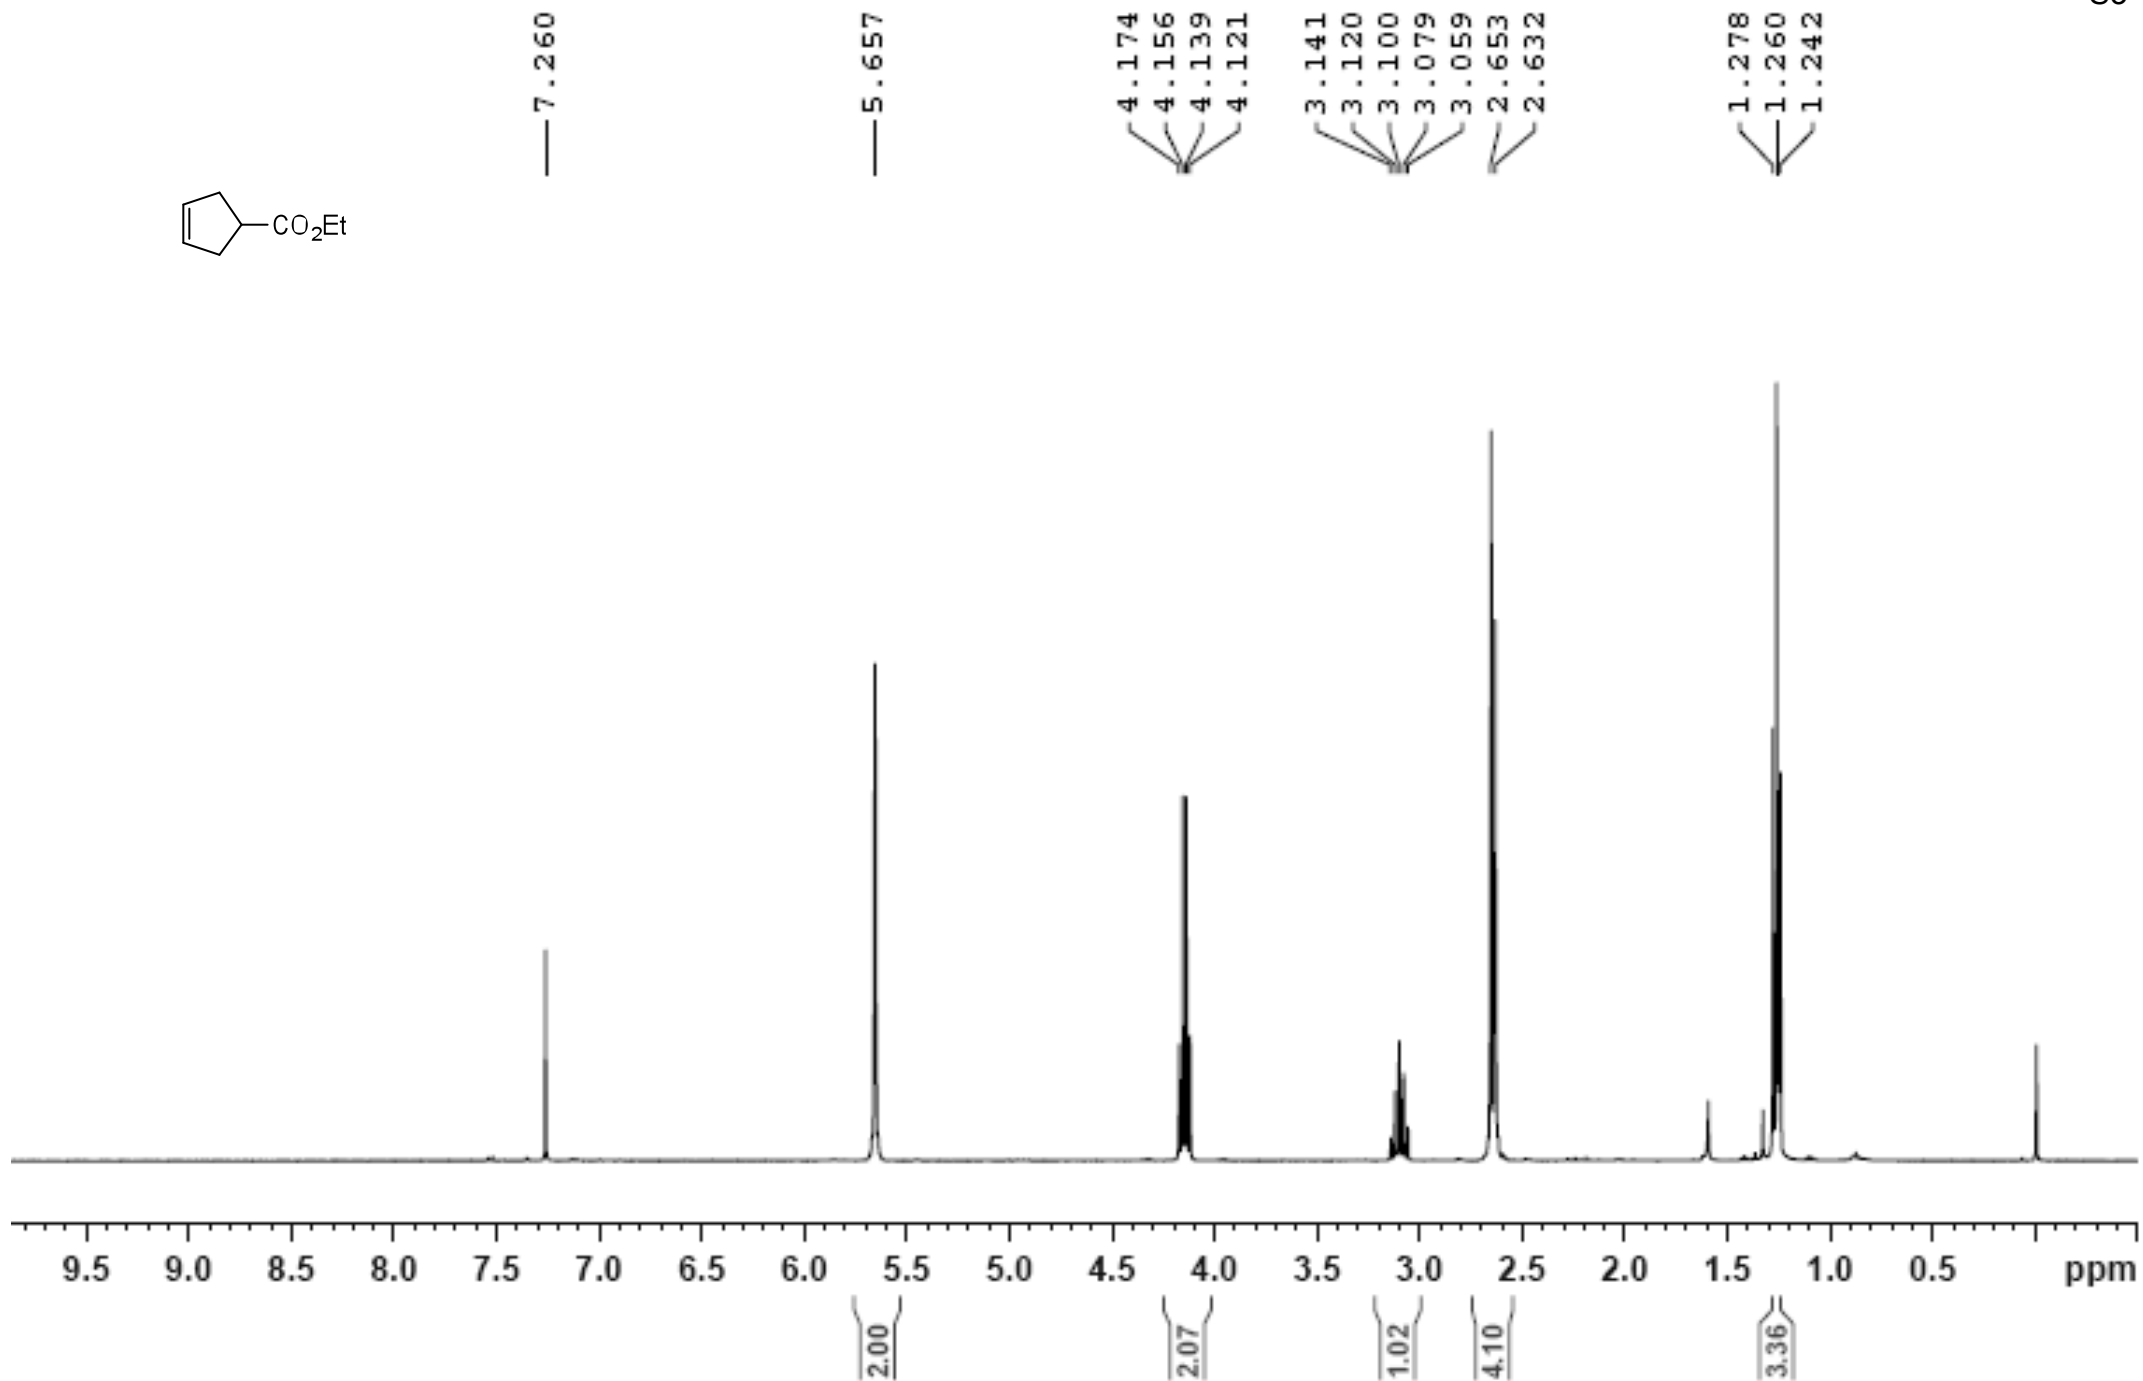

6057-1 cdcl3 14 nov 2012

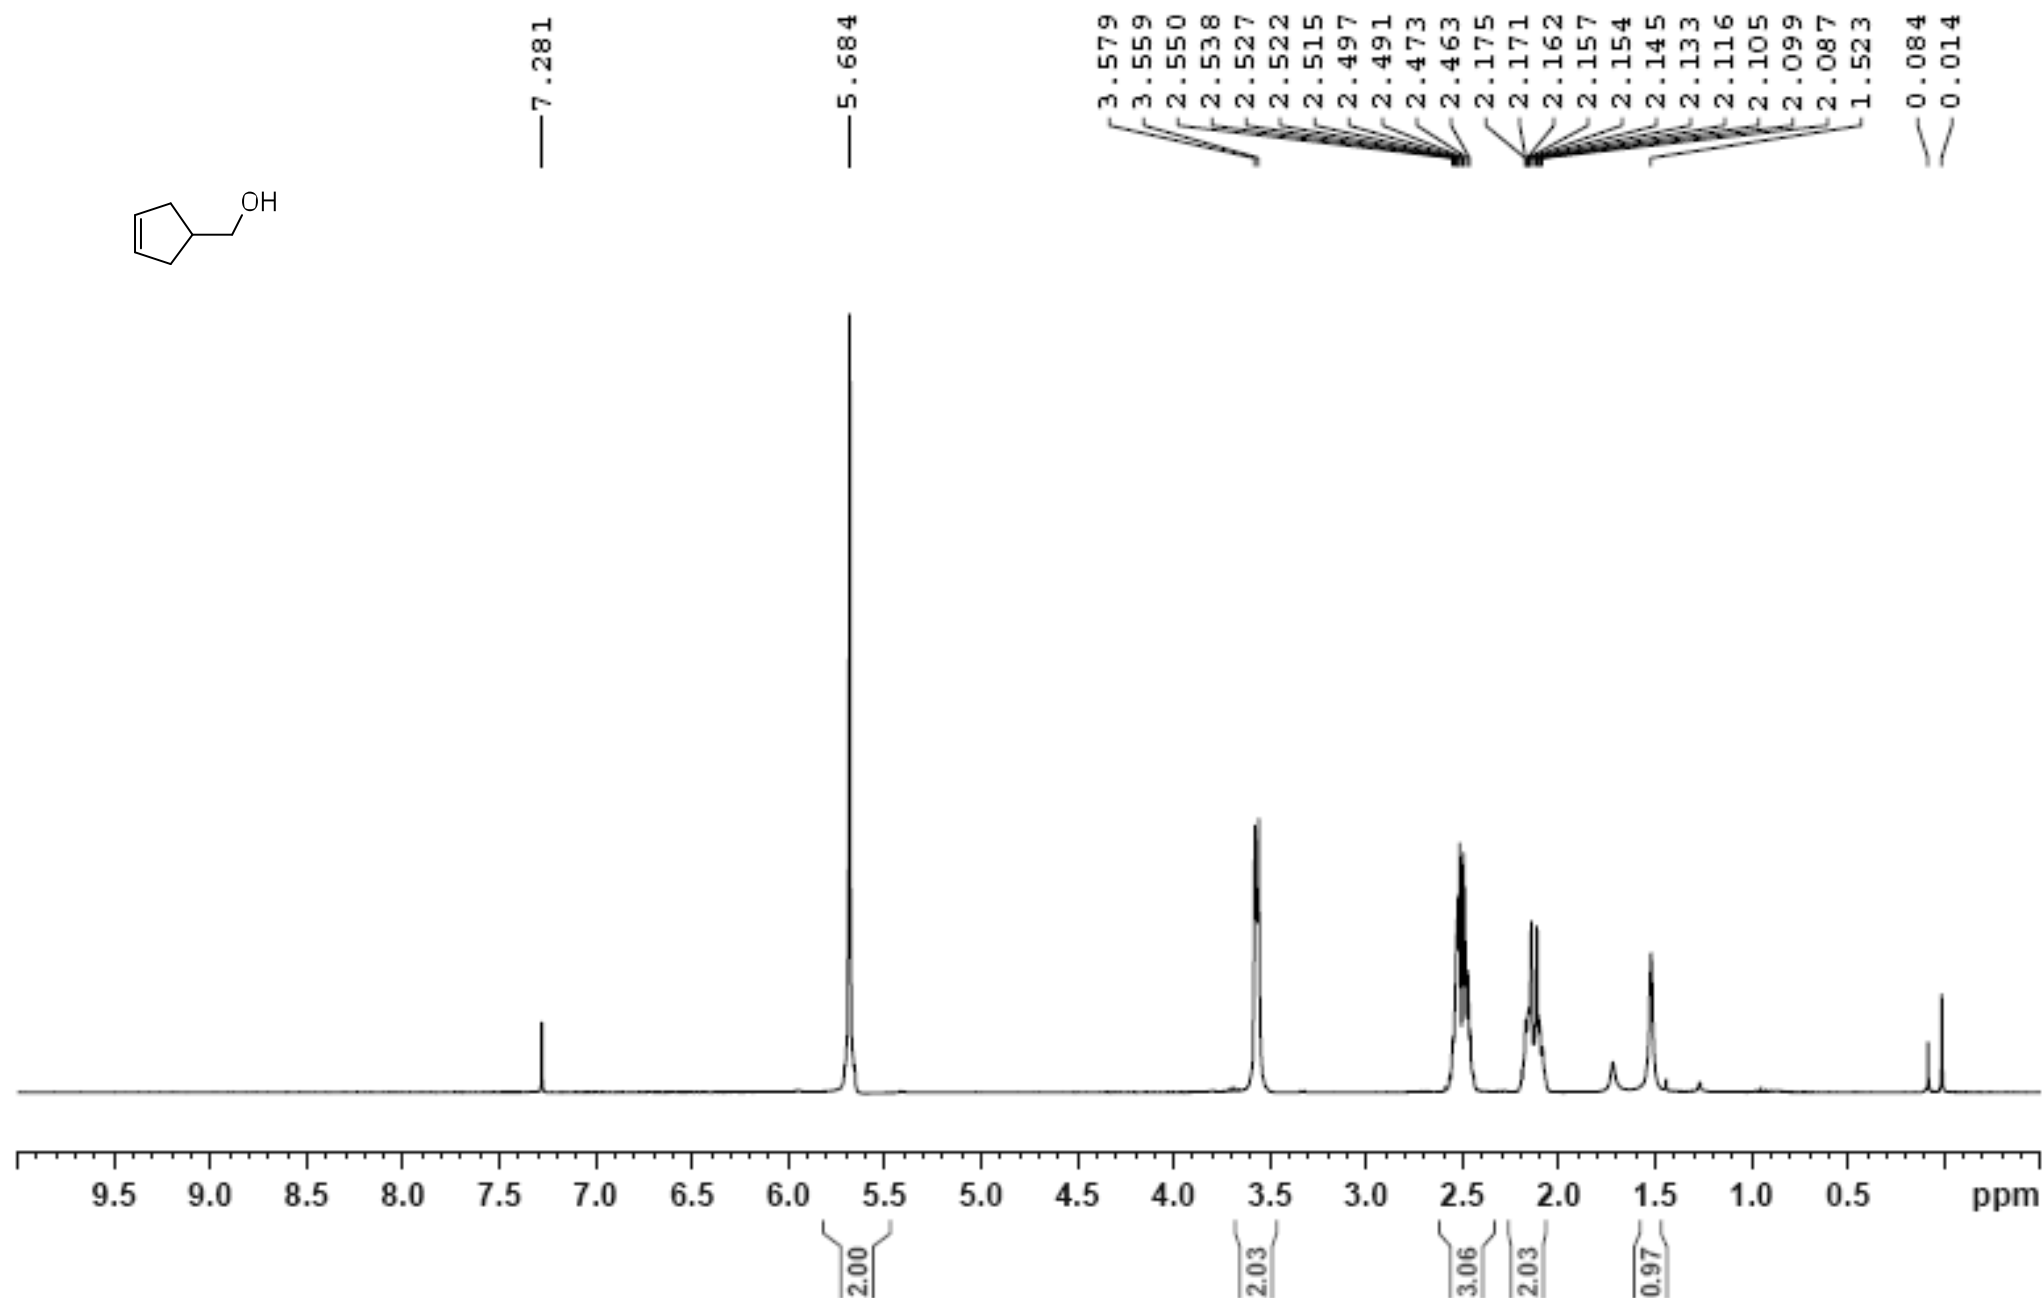

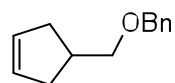

7.354  
7.324  
7.322  
7.311  
7.301  
7.292  
7.290  
7.280  
7.271  
7.270  
7.268  
7.260  
5.676  
5.666  
5.655  
5.644  
5.635  
4.529  
3.392  
3.374  
2.644  
2.641  
2.637  
2.632  
2.626  
2.623  
2.619  
2.613  
2.605  
2.601  
2.595  
2.589  
2.583  
2.534  
2.529  
2.526  
2.521  
2.512  
2.507  
2.501  
2.489  
2.486  
2.480  
2.475  
2.465  
2.458  
2.453  
2.160  
2.152  
2.146  
2.138  
2.133

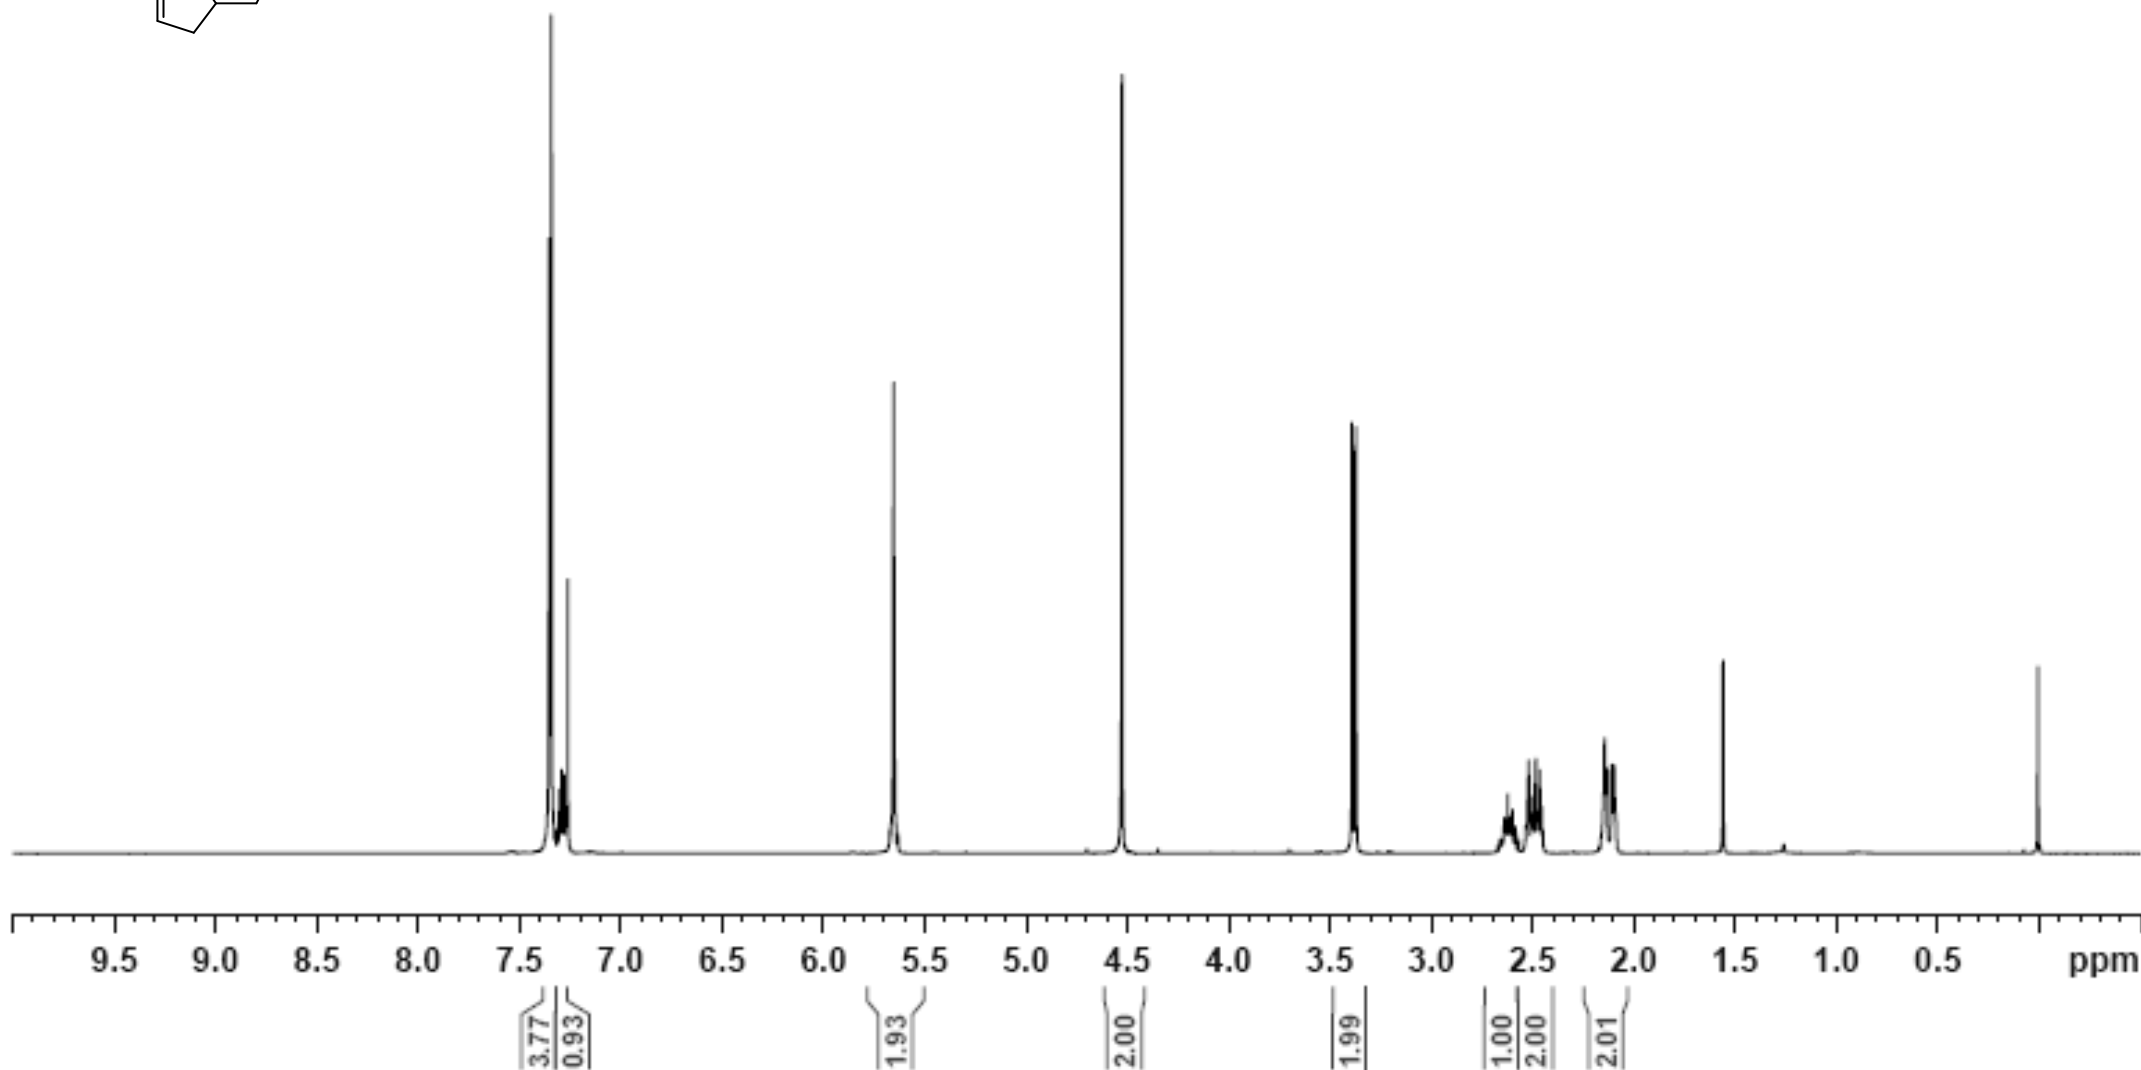

6074 AV300 CDCl<sub>3</sub> 28 Dec 2012

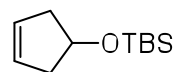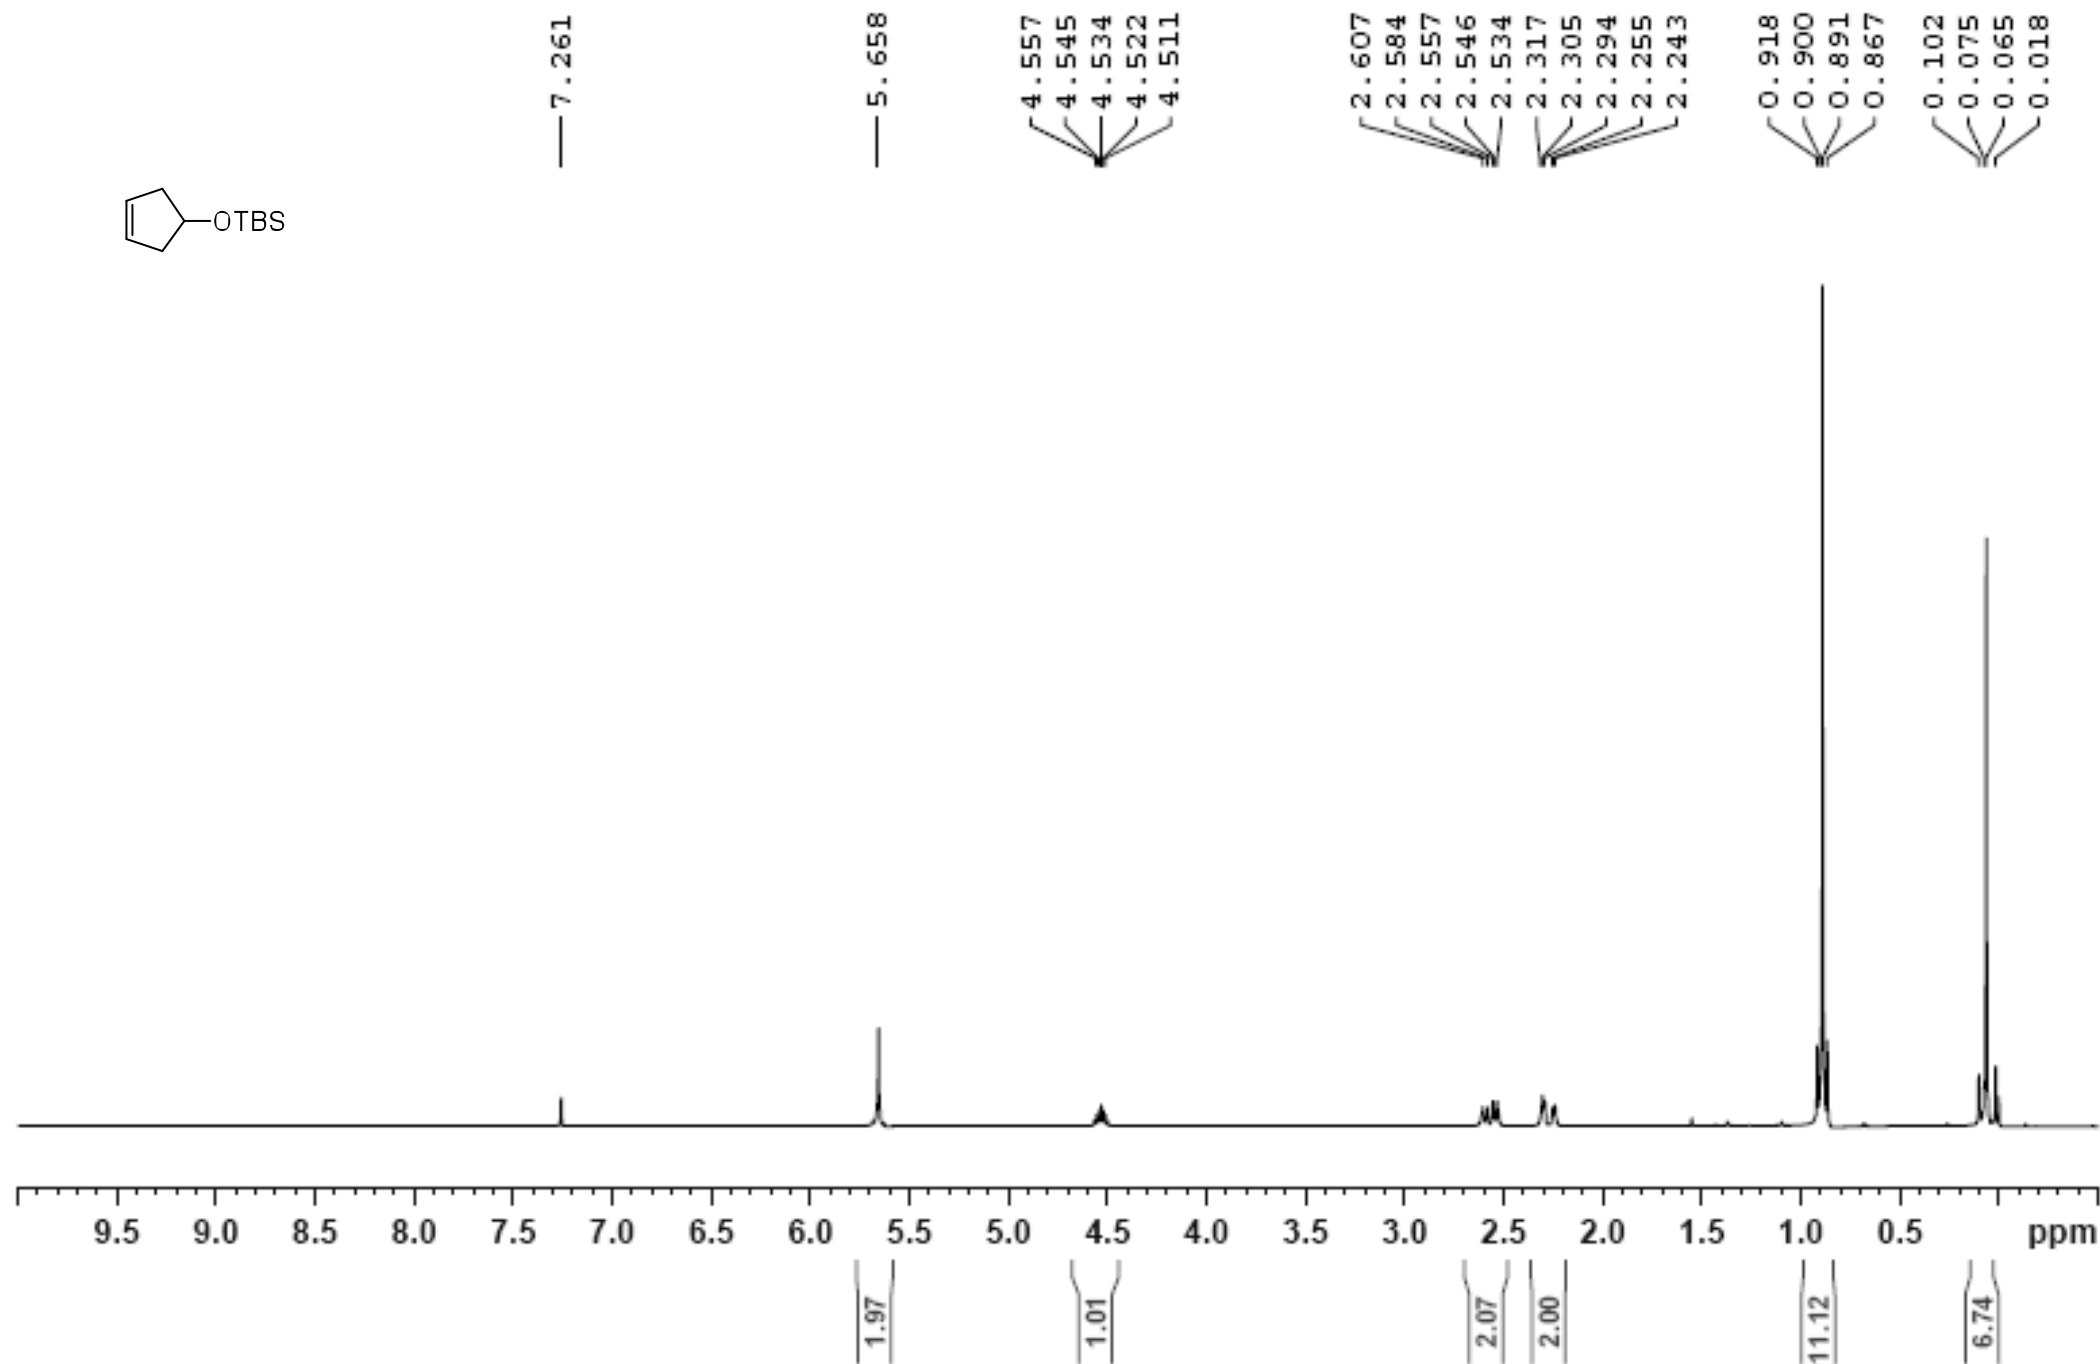

60413-1.DOCX  
AV400MHZ HNMR  
2012-11-6

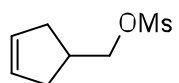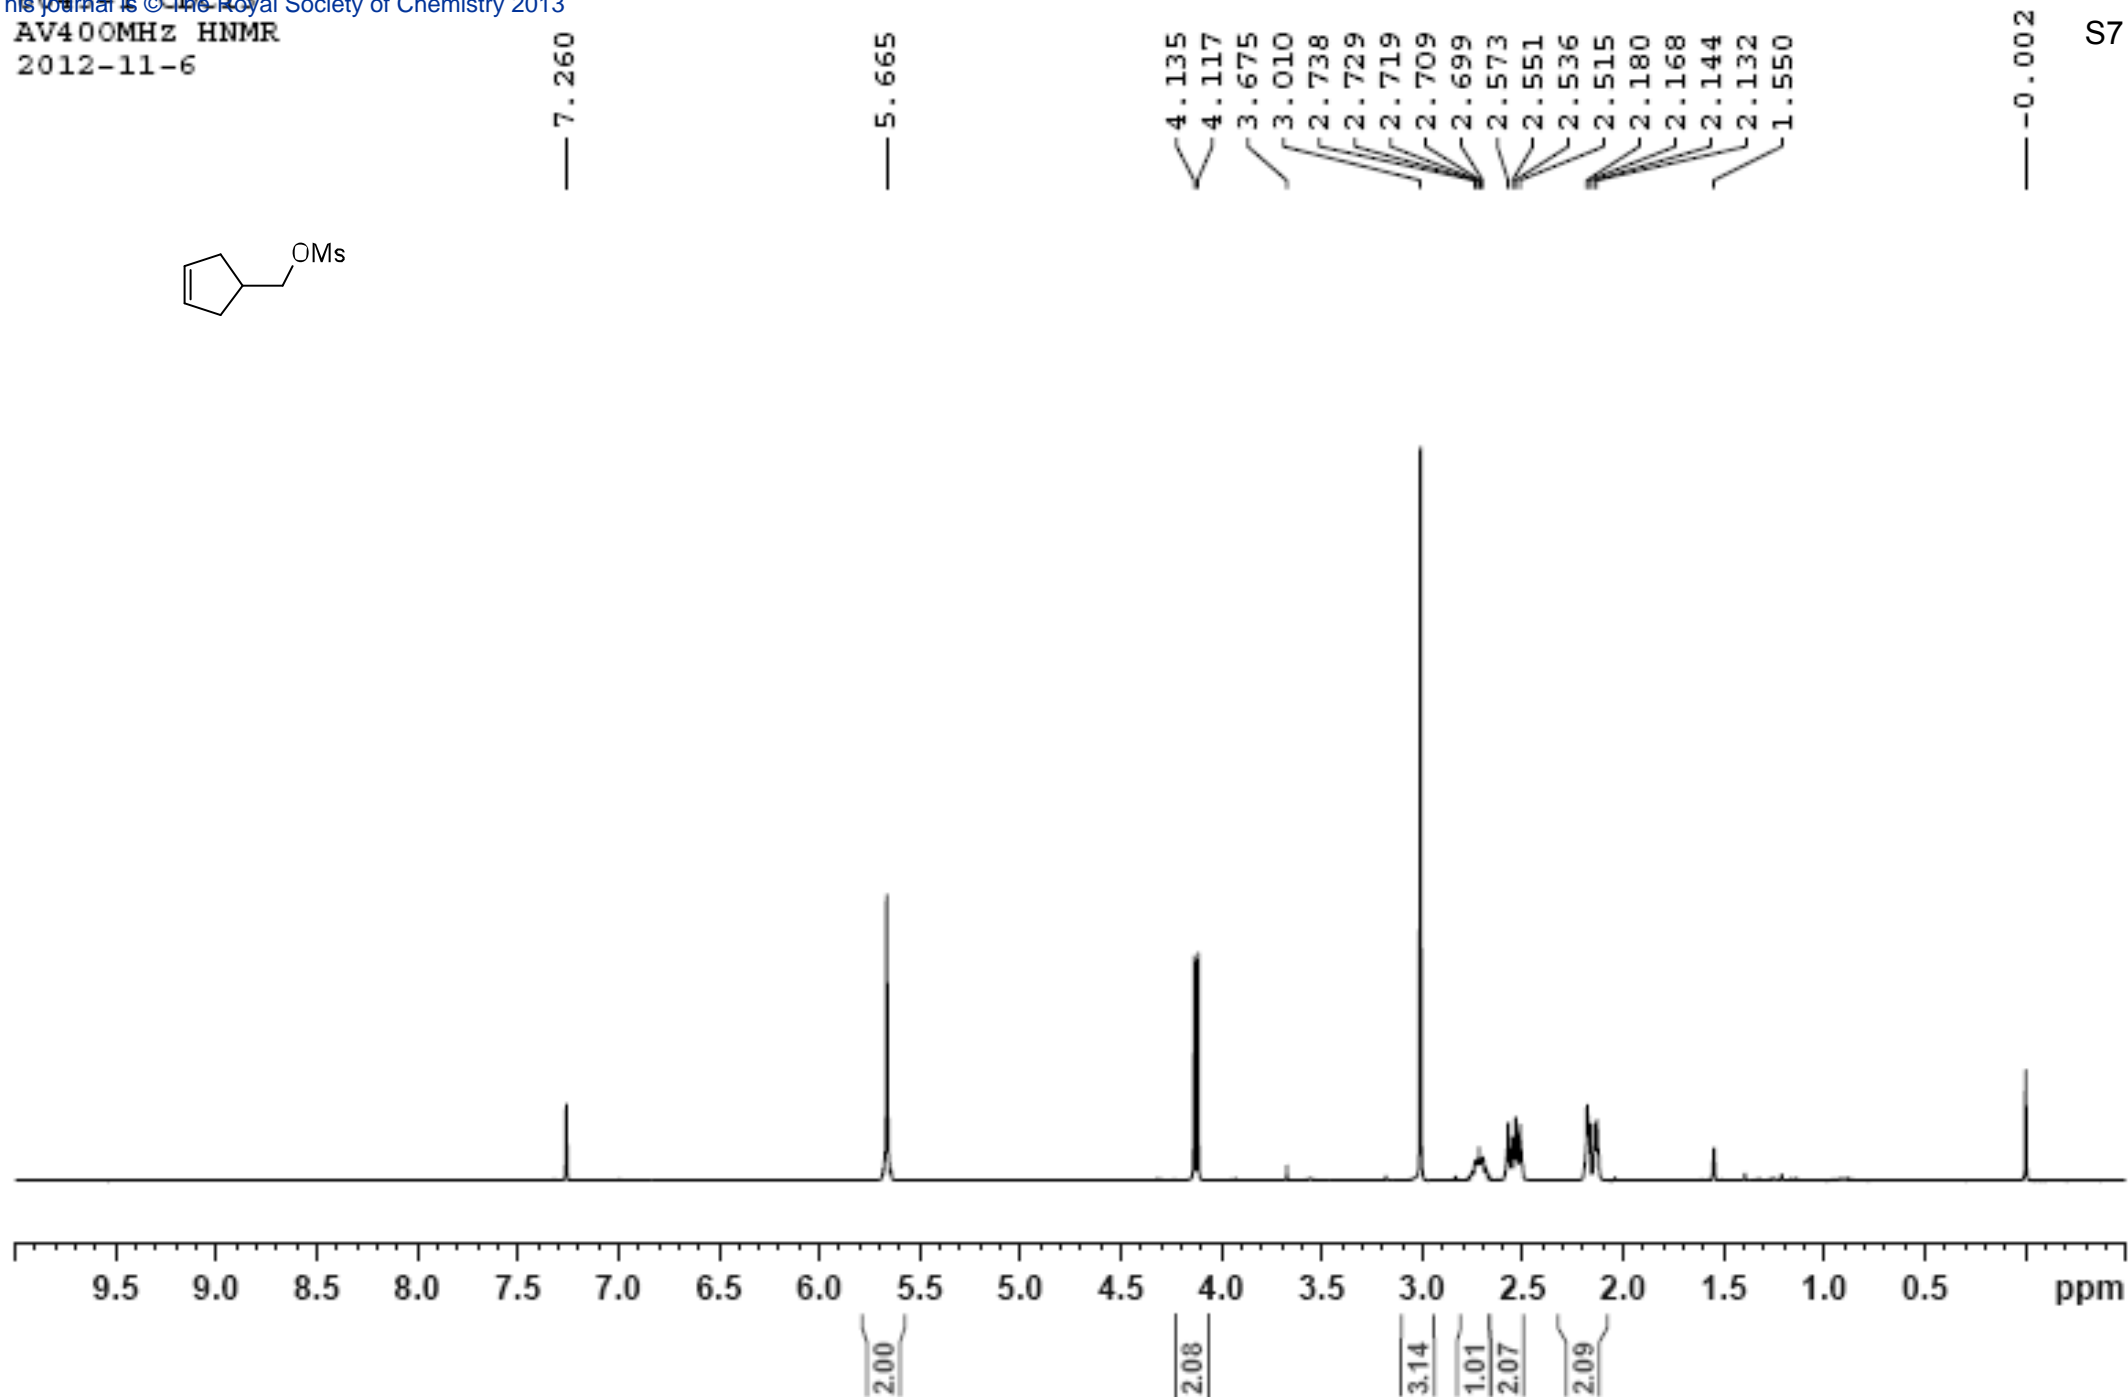

CCDC 909410

AV400MHz HNMR

2012-11-12

S8

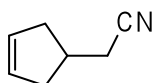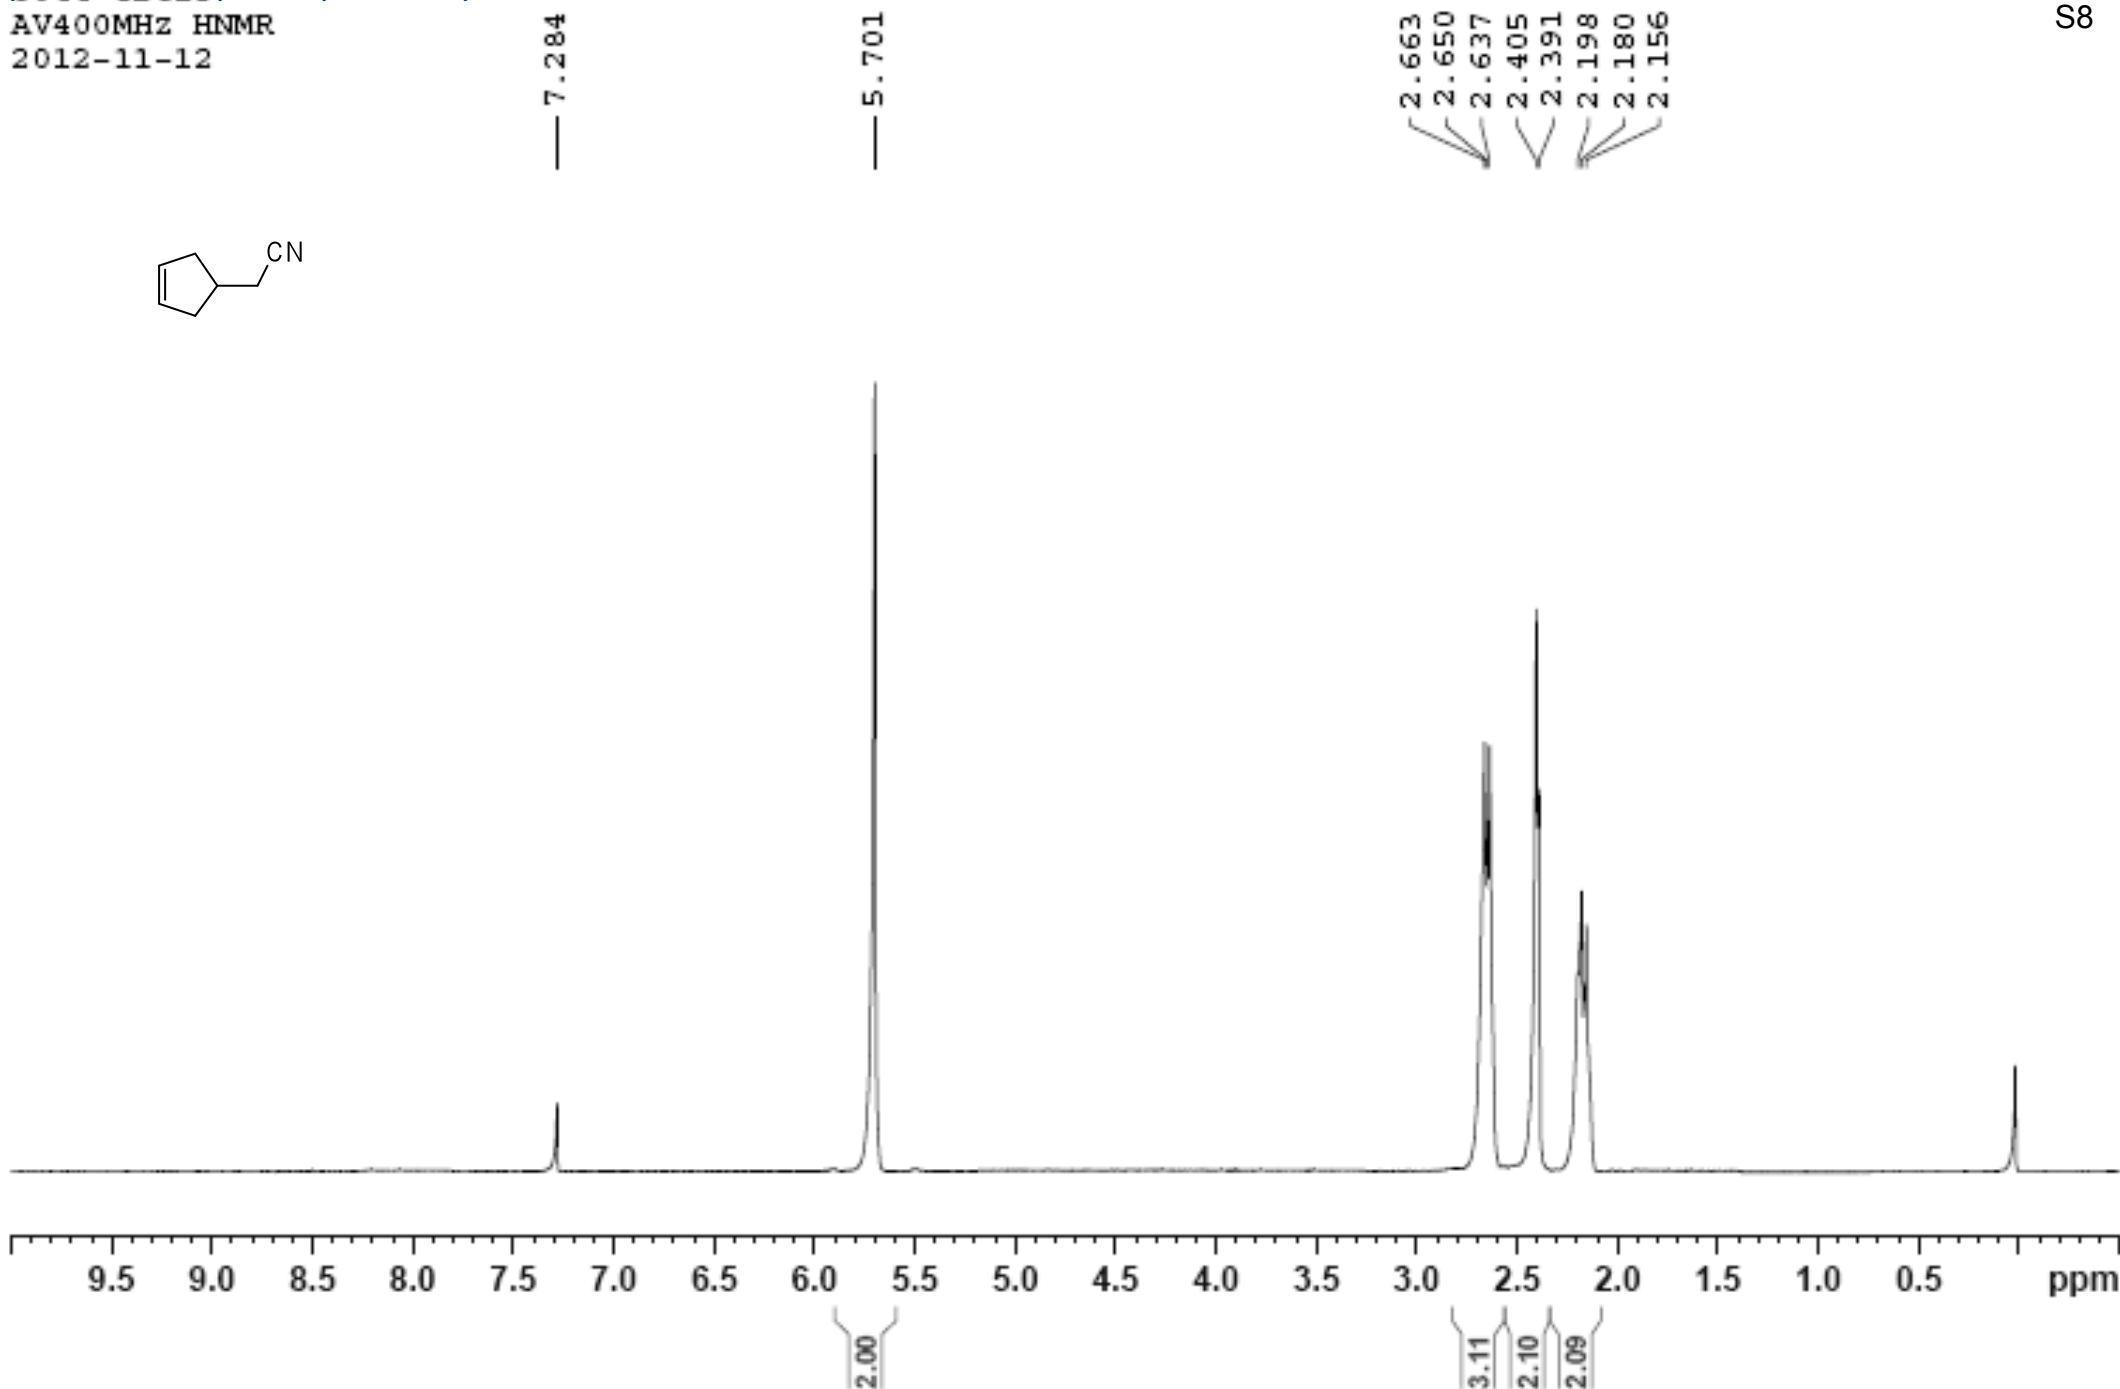



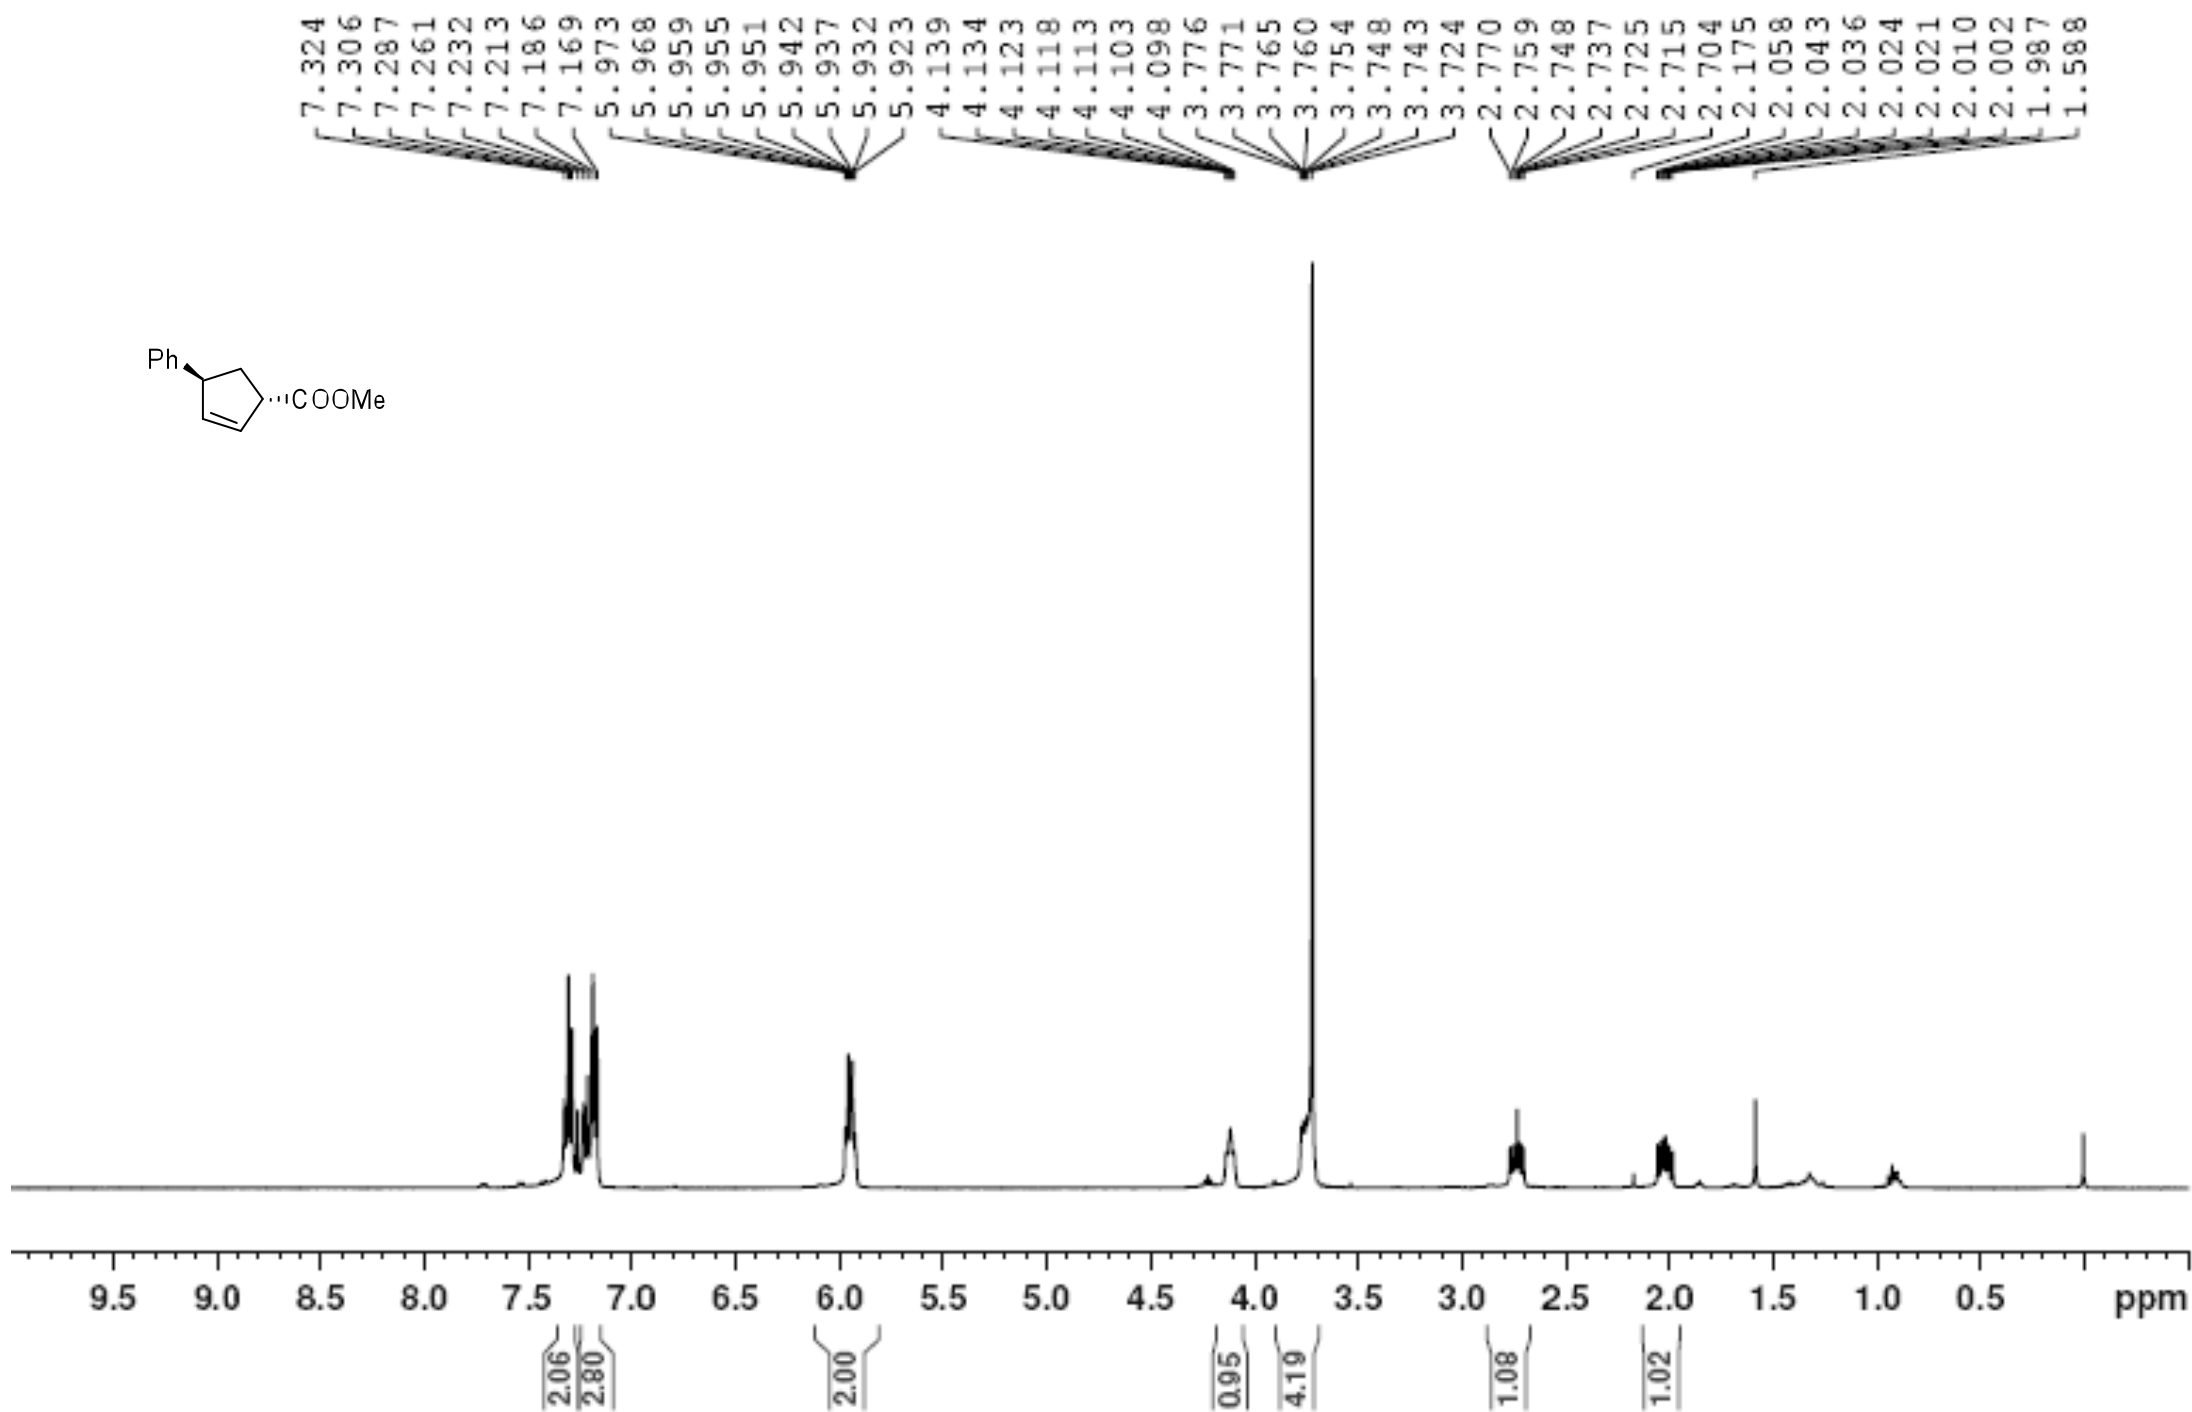

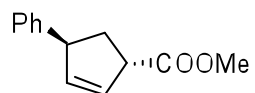

— 175.14

— 145.25

— 137.73

129.79

128.79

127.37

126.64

77.57

77.25

76.93

52.19

51.05

50.75

— 37.26

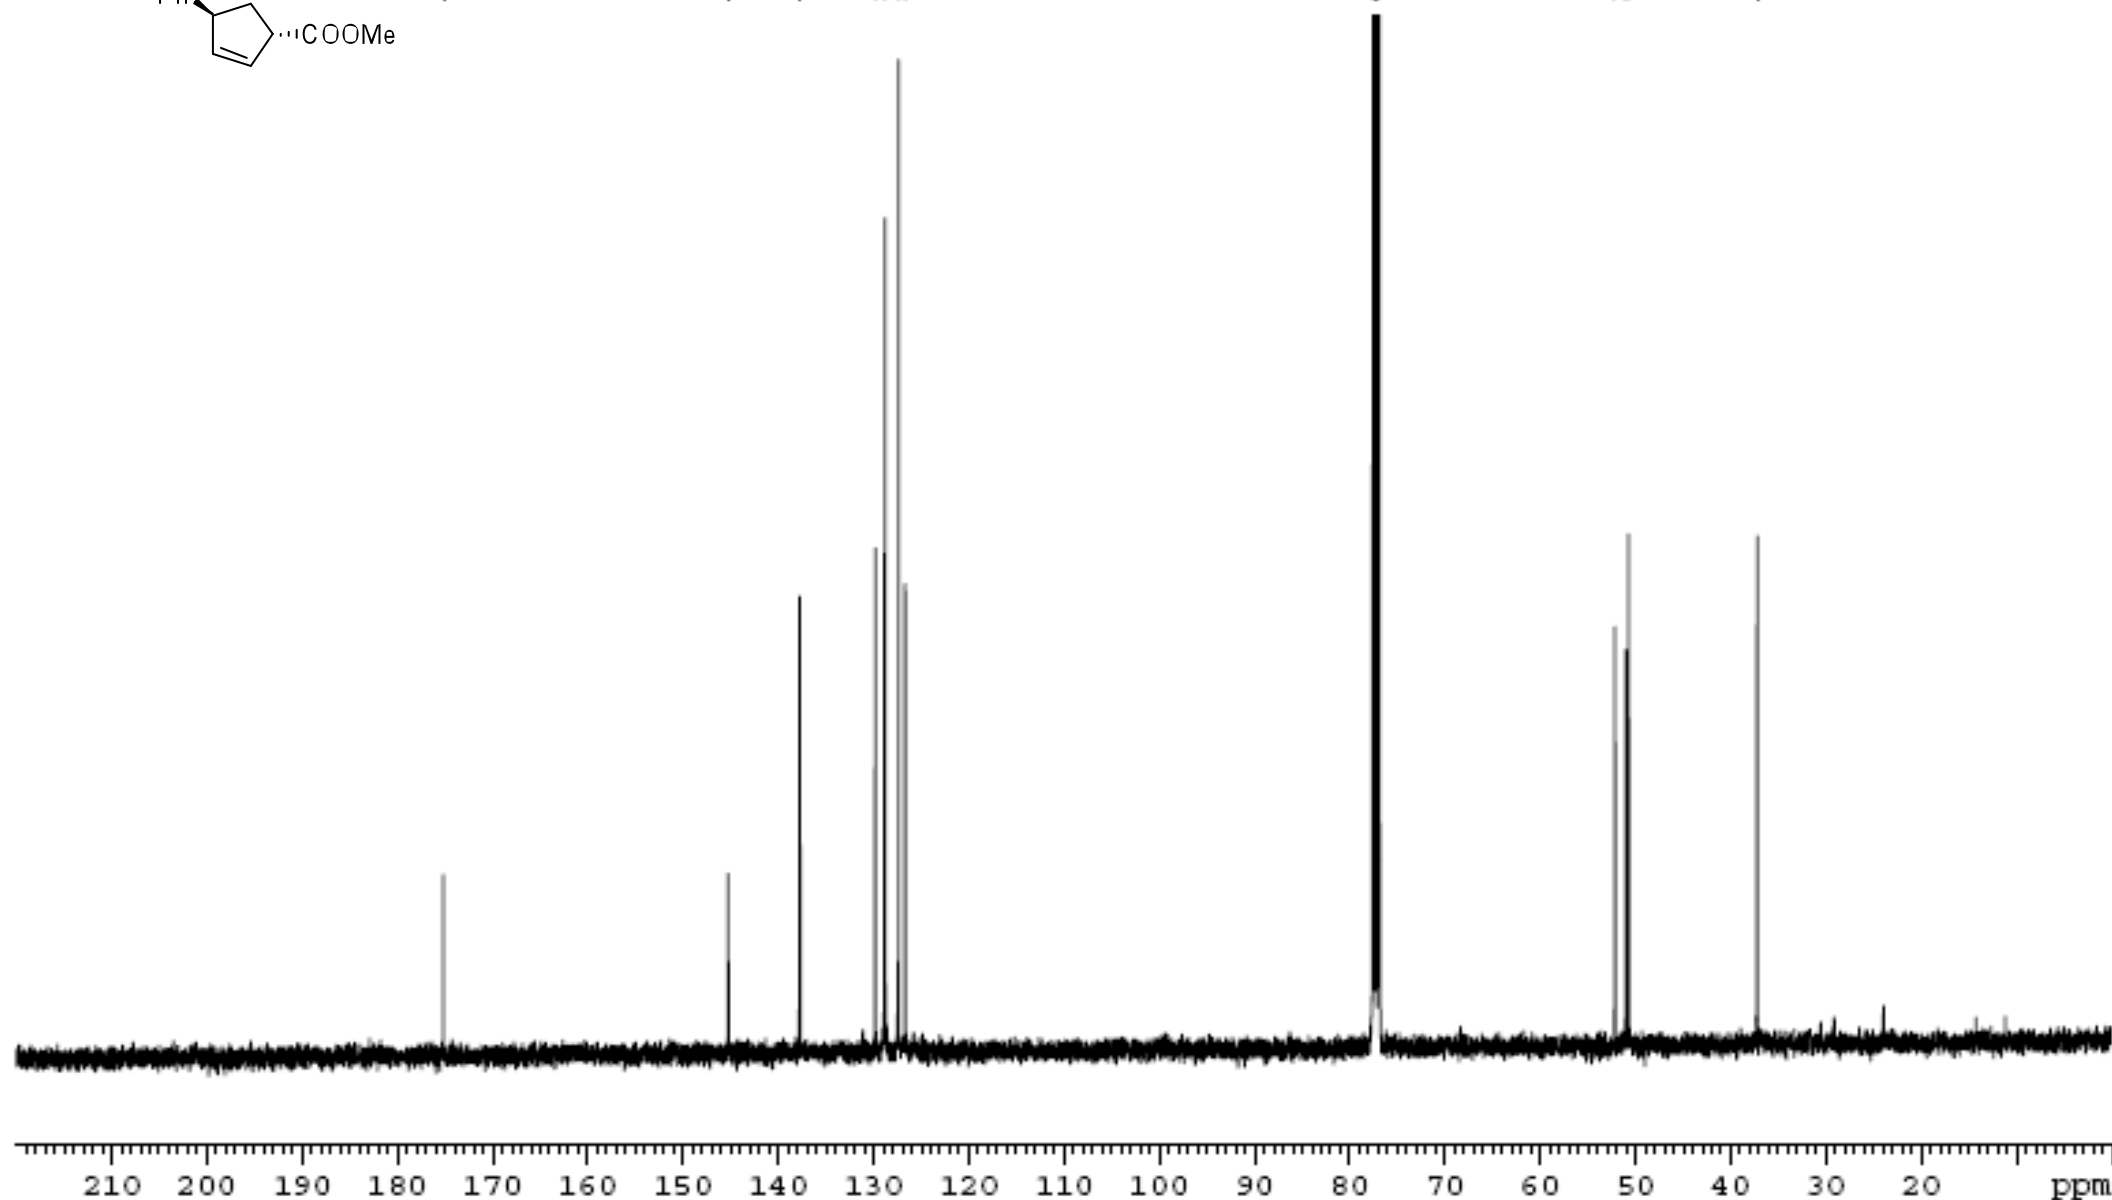

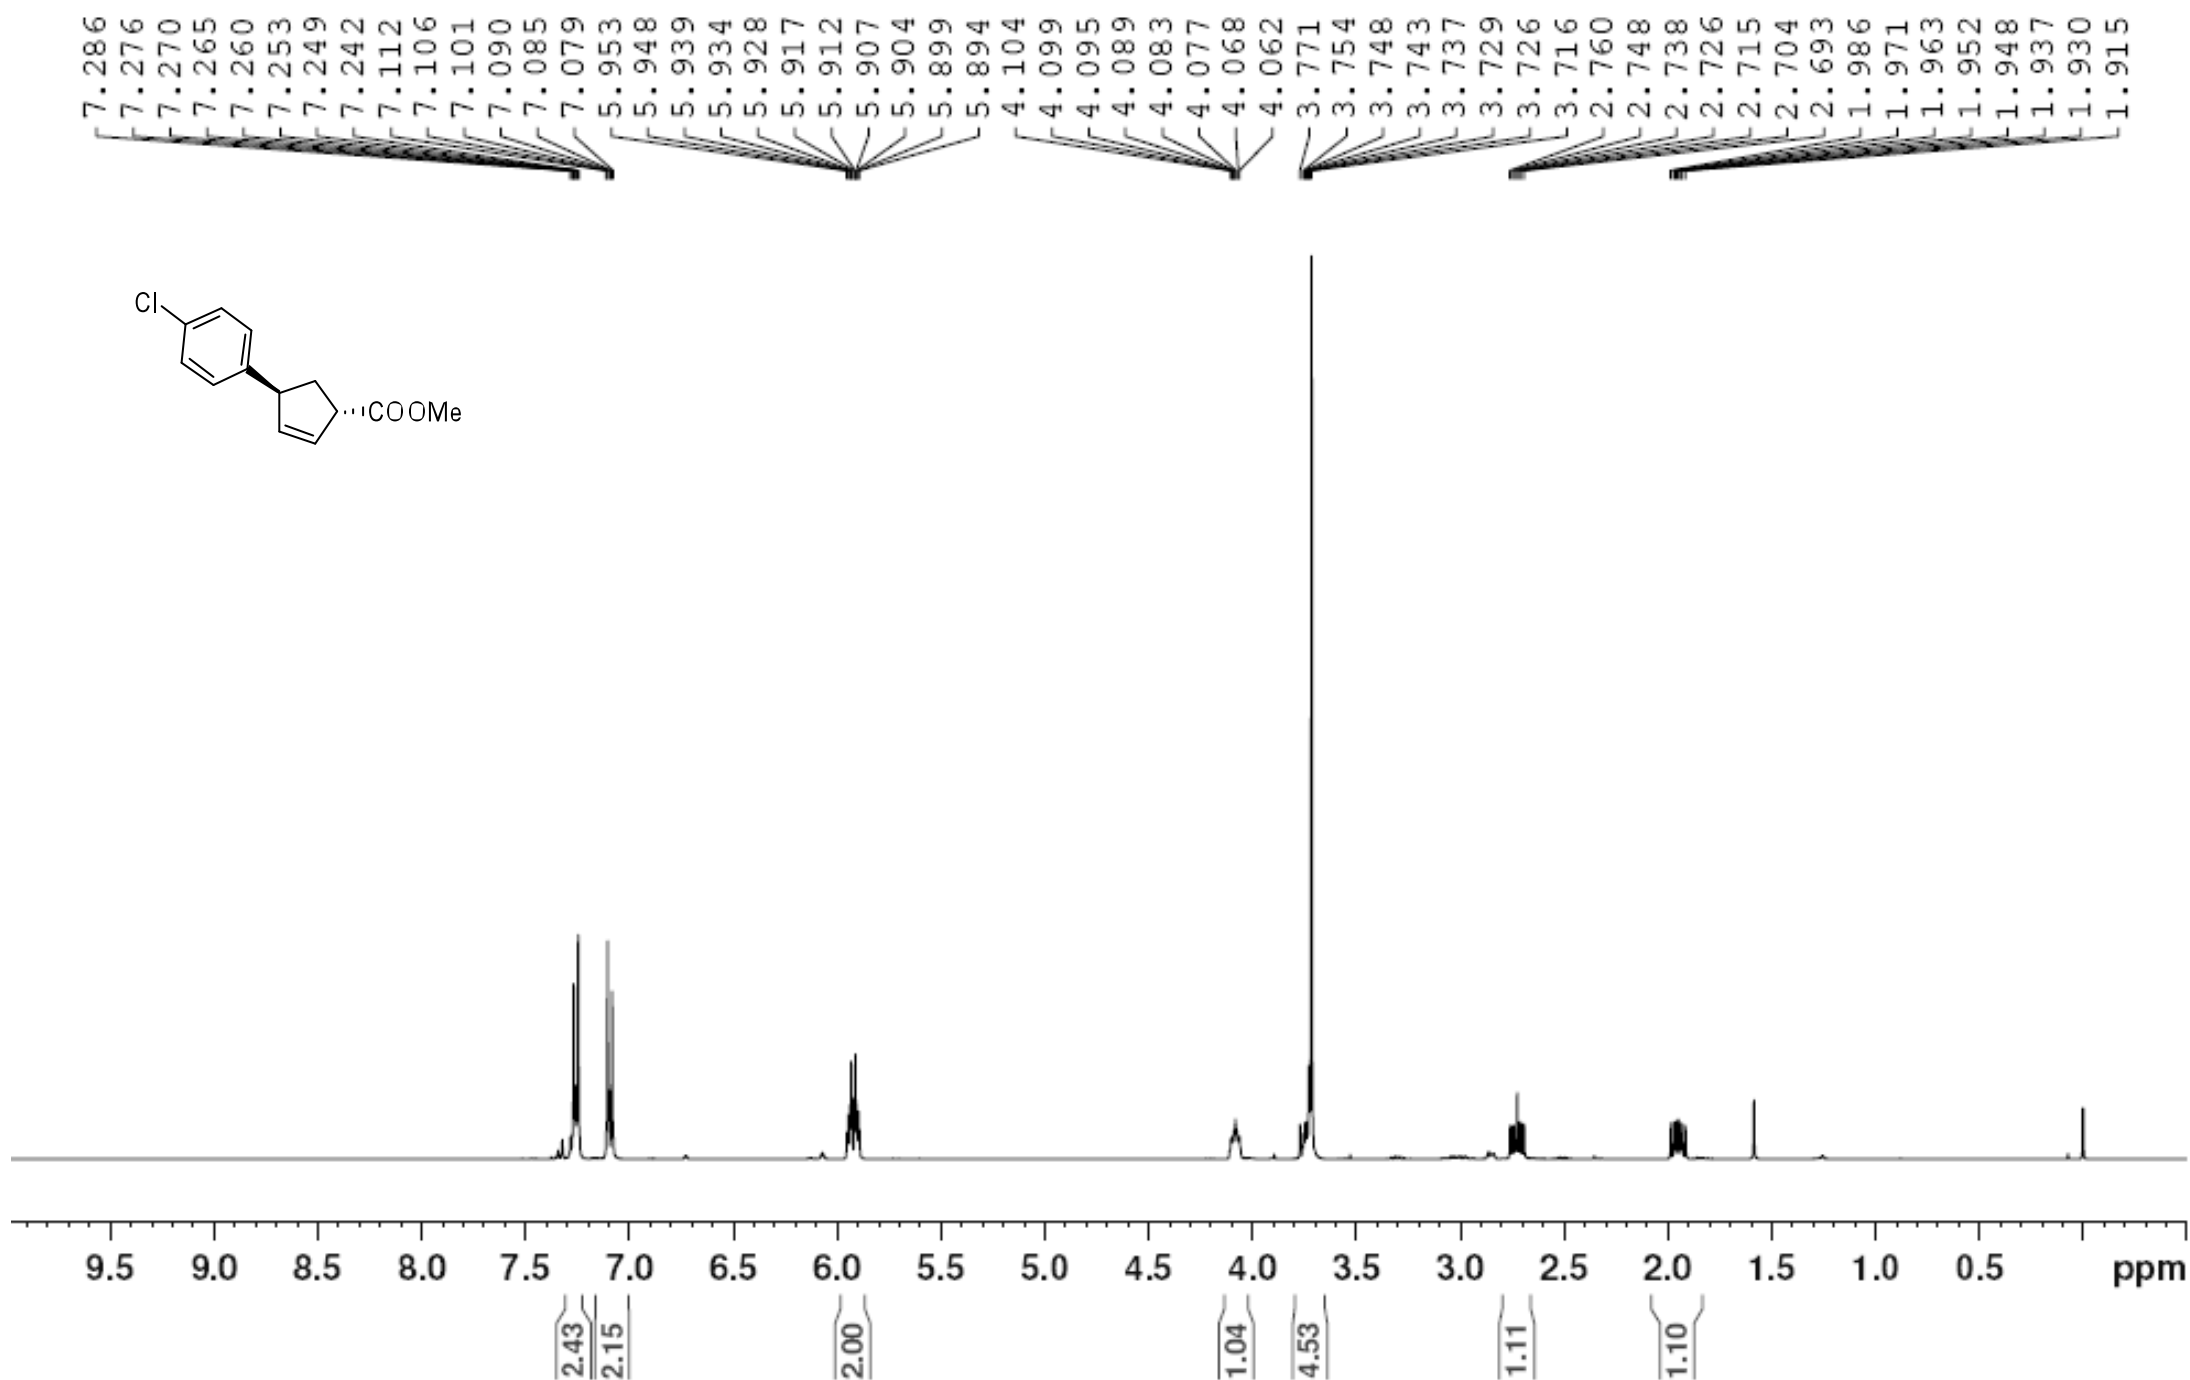

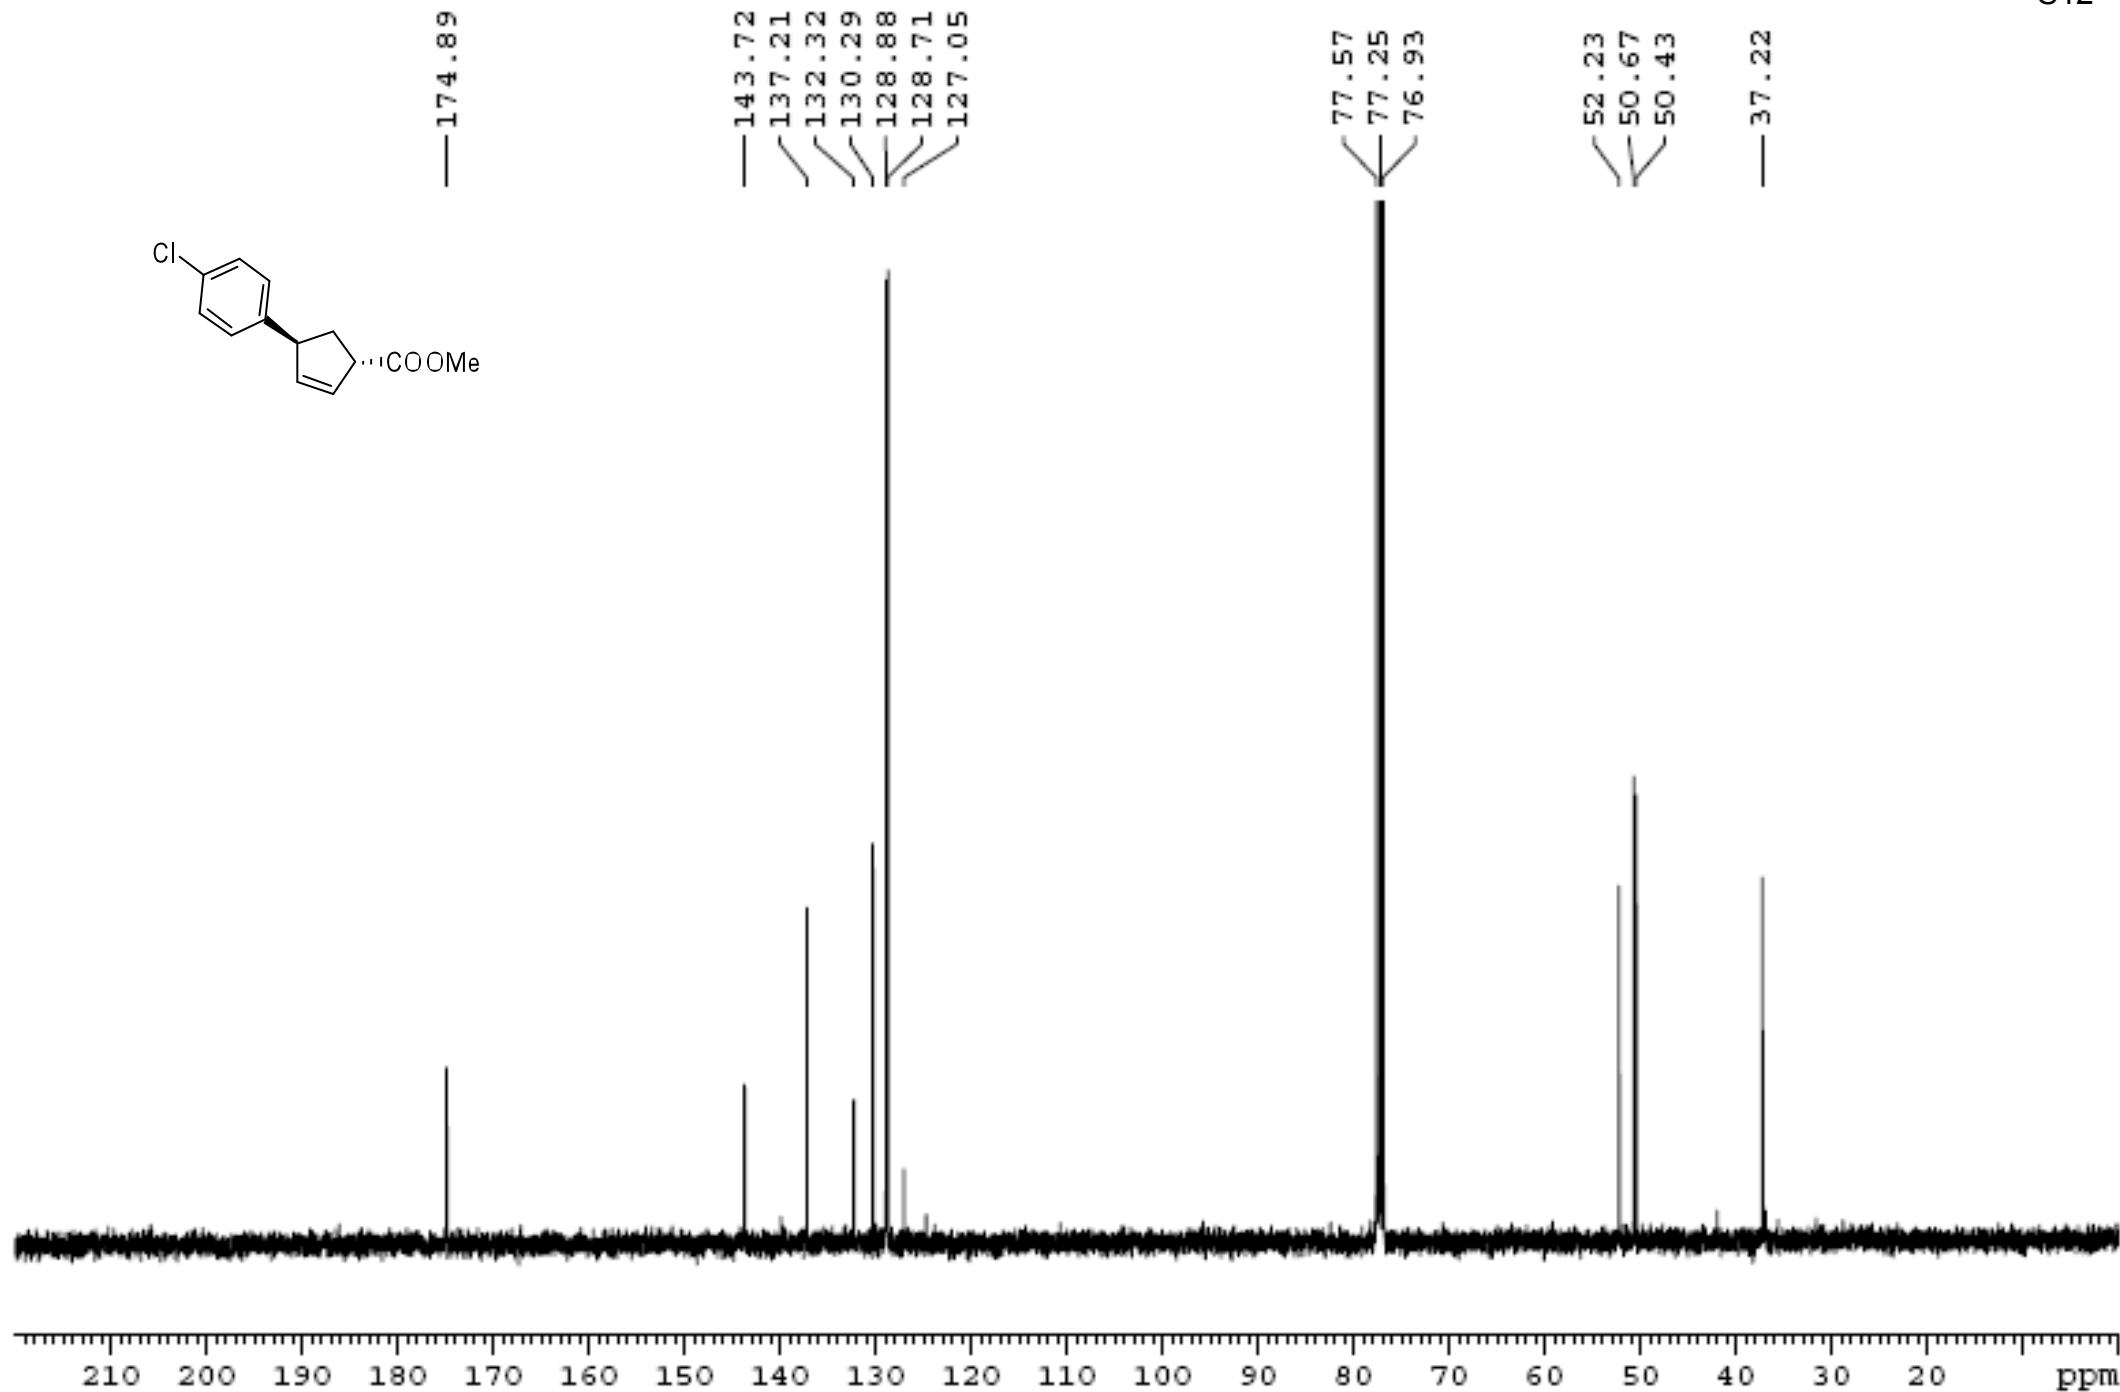

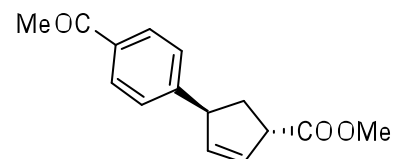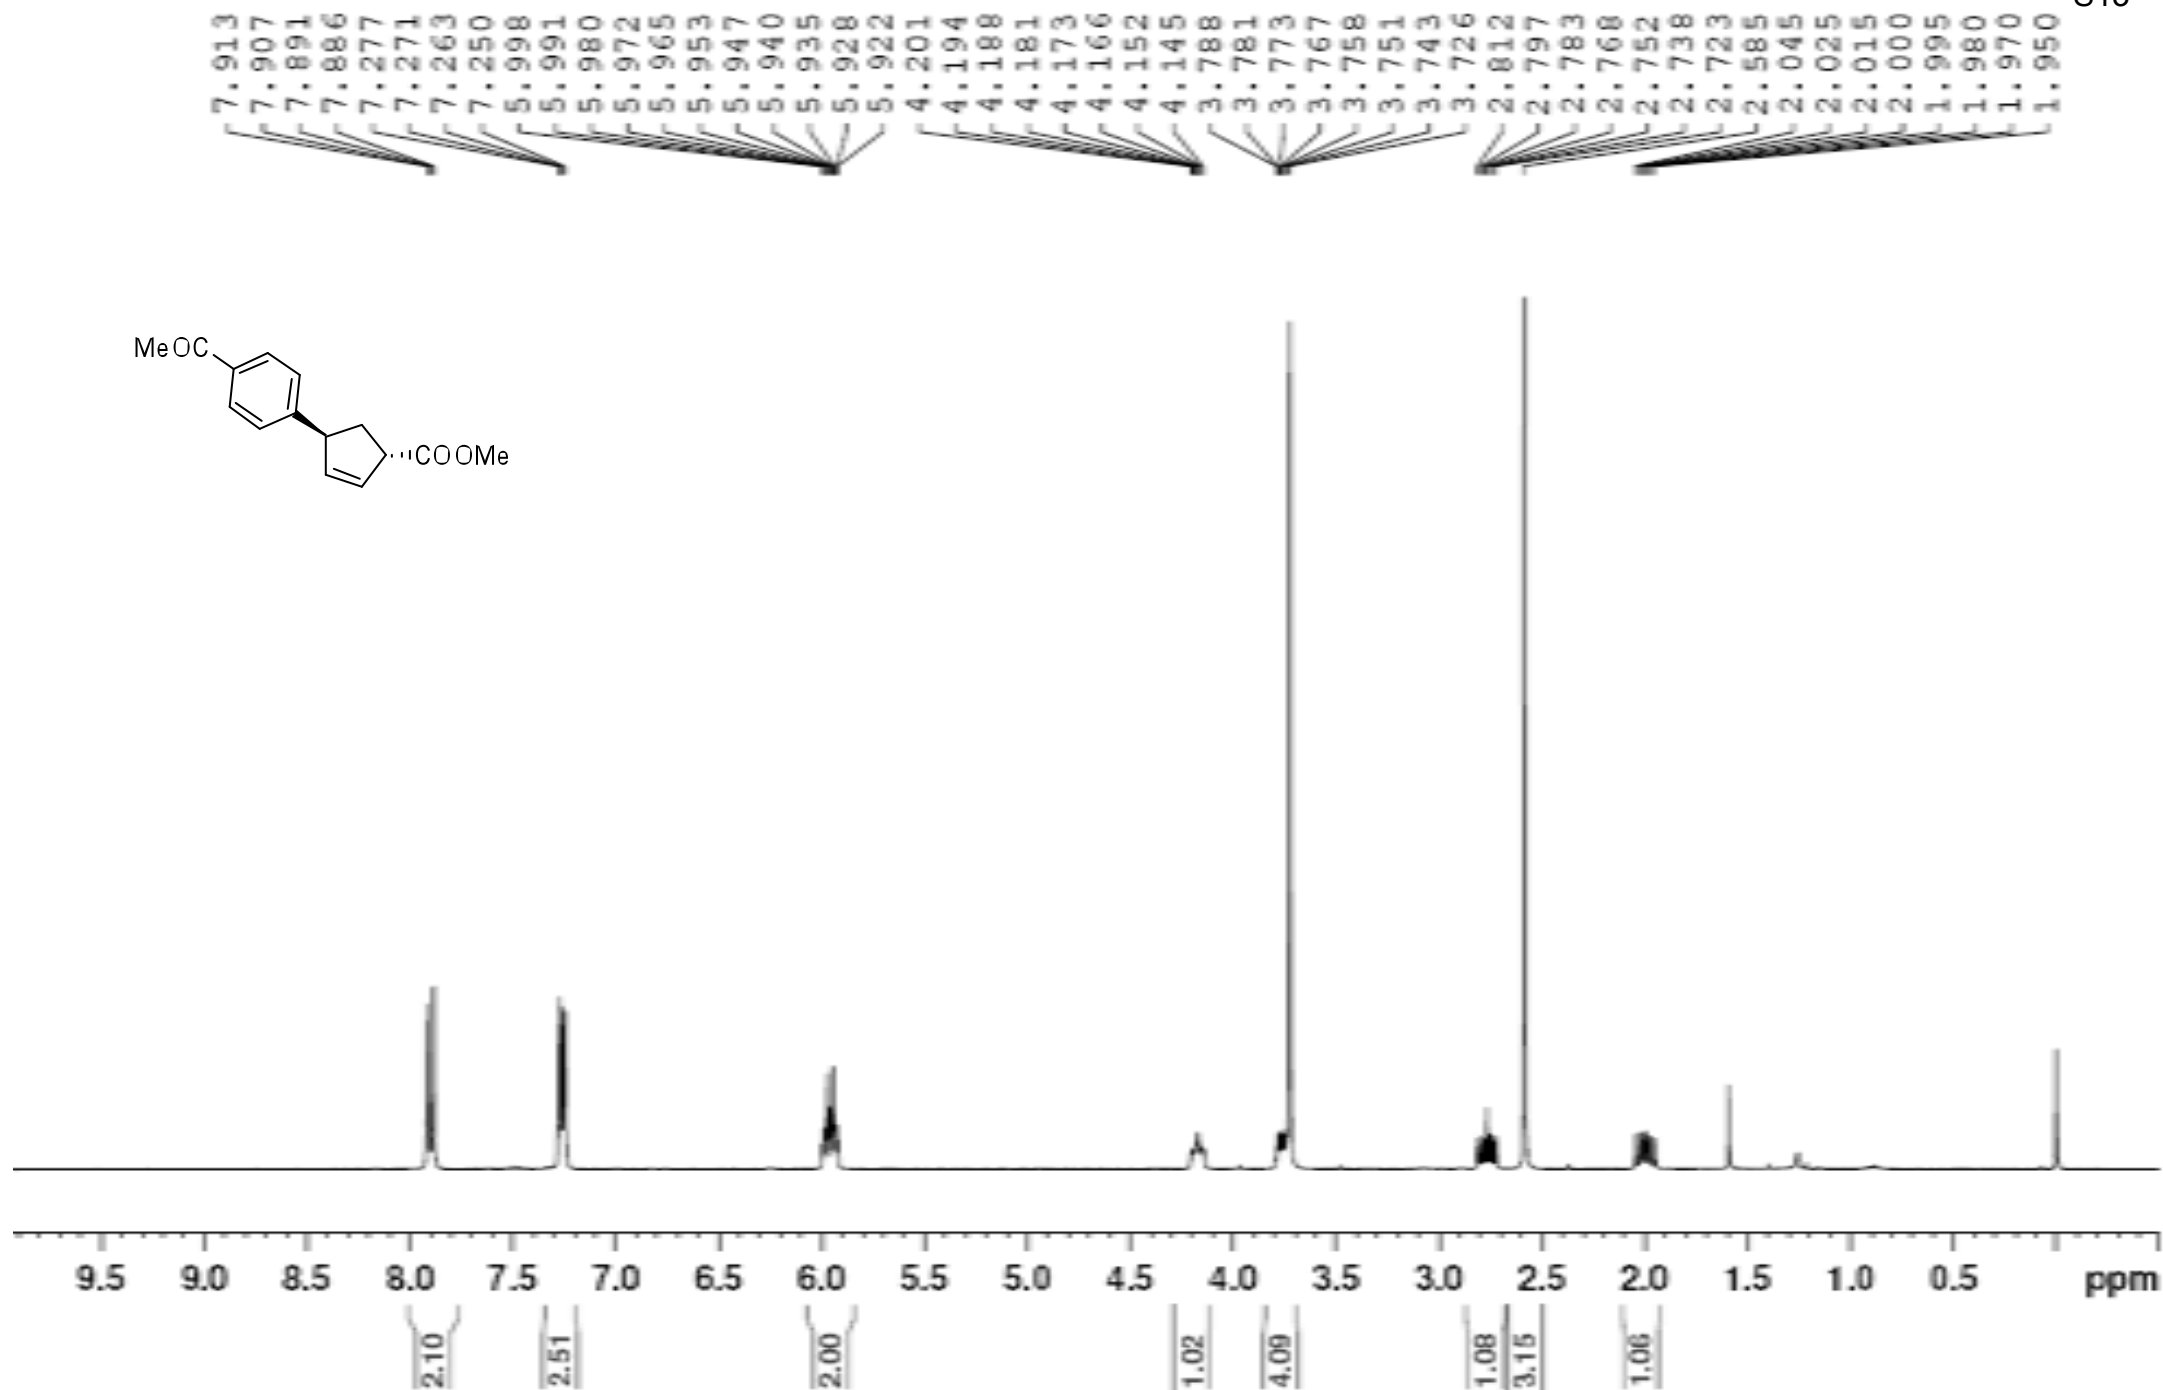

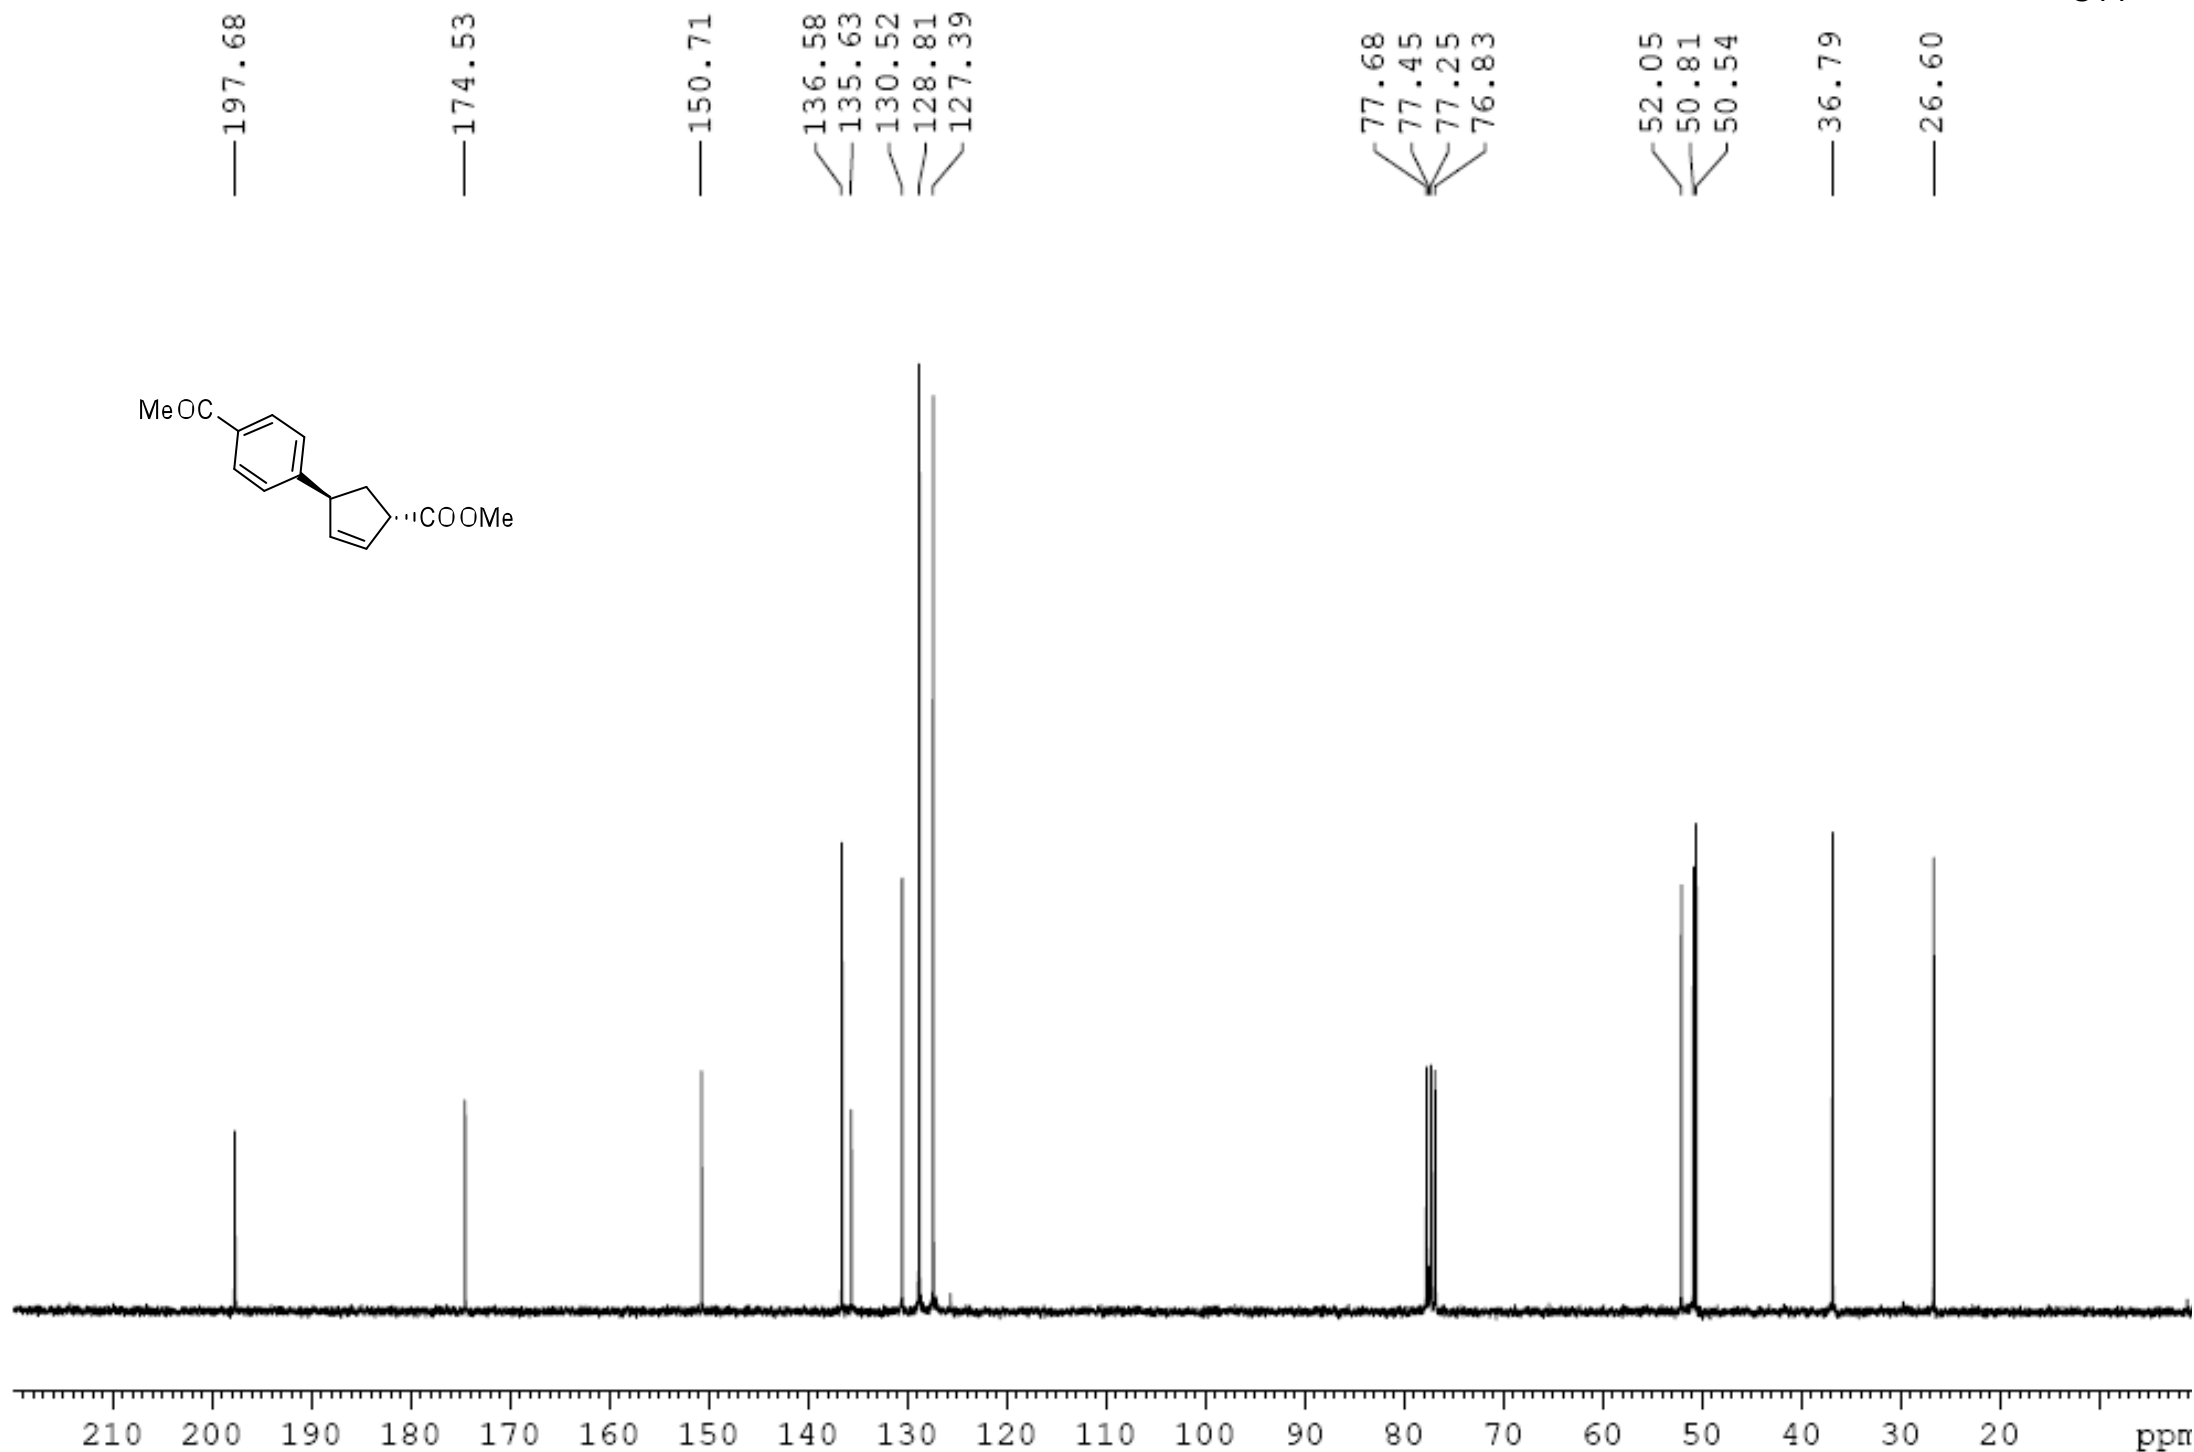

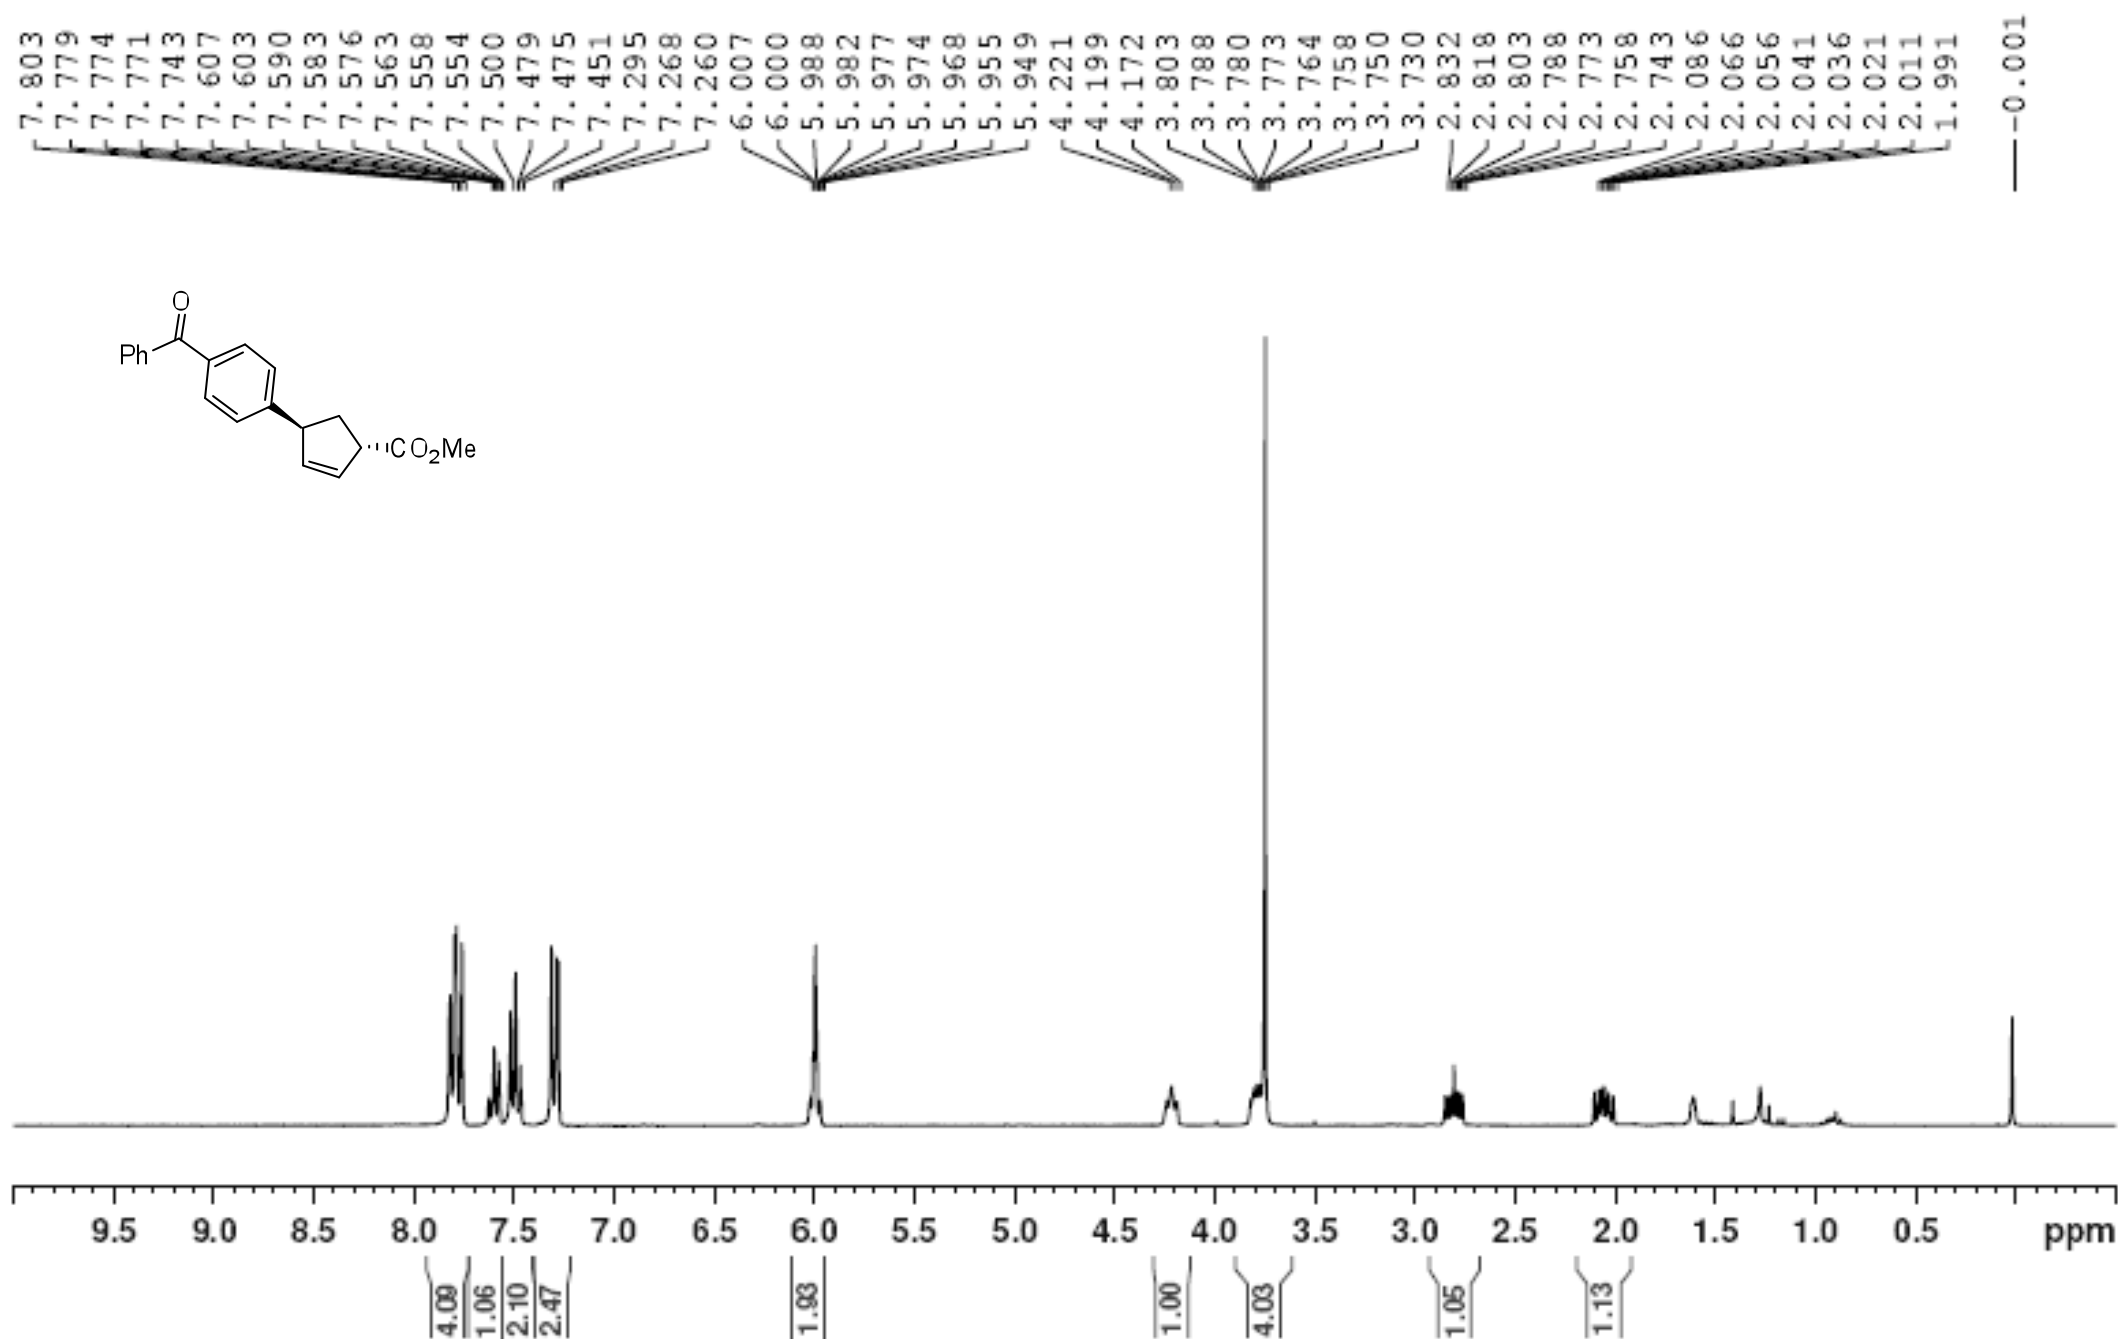

13j-6062-3 CDCl<sub>3</sub>, Bruker AVIII 400 MHz BBF02

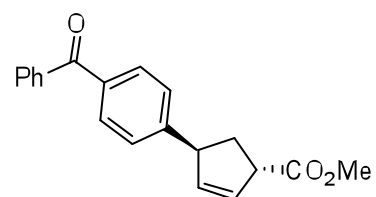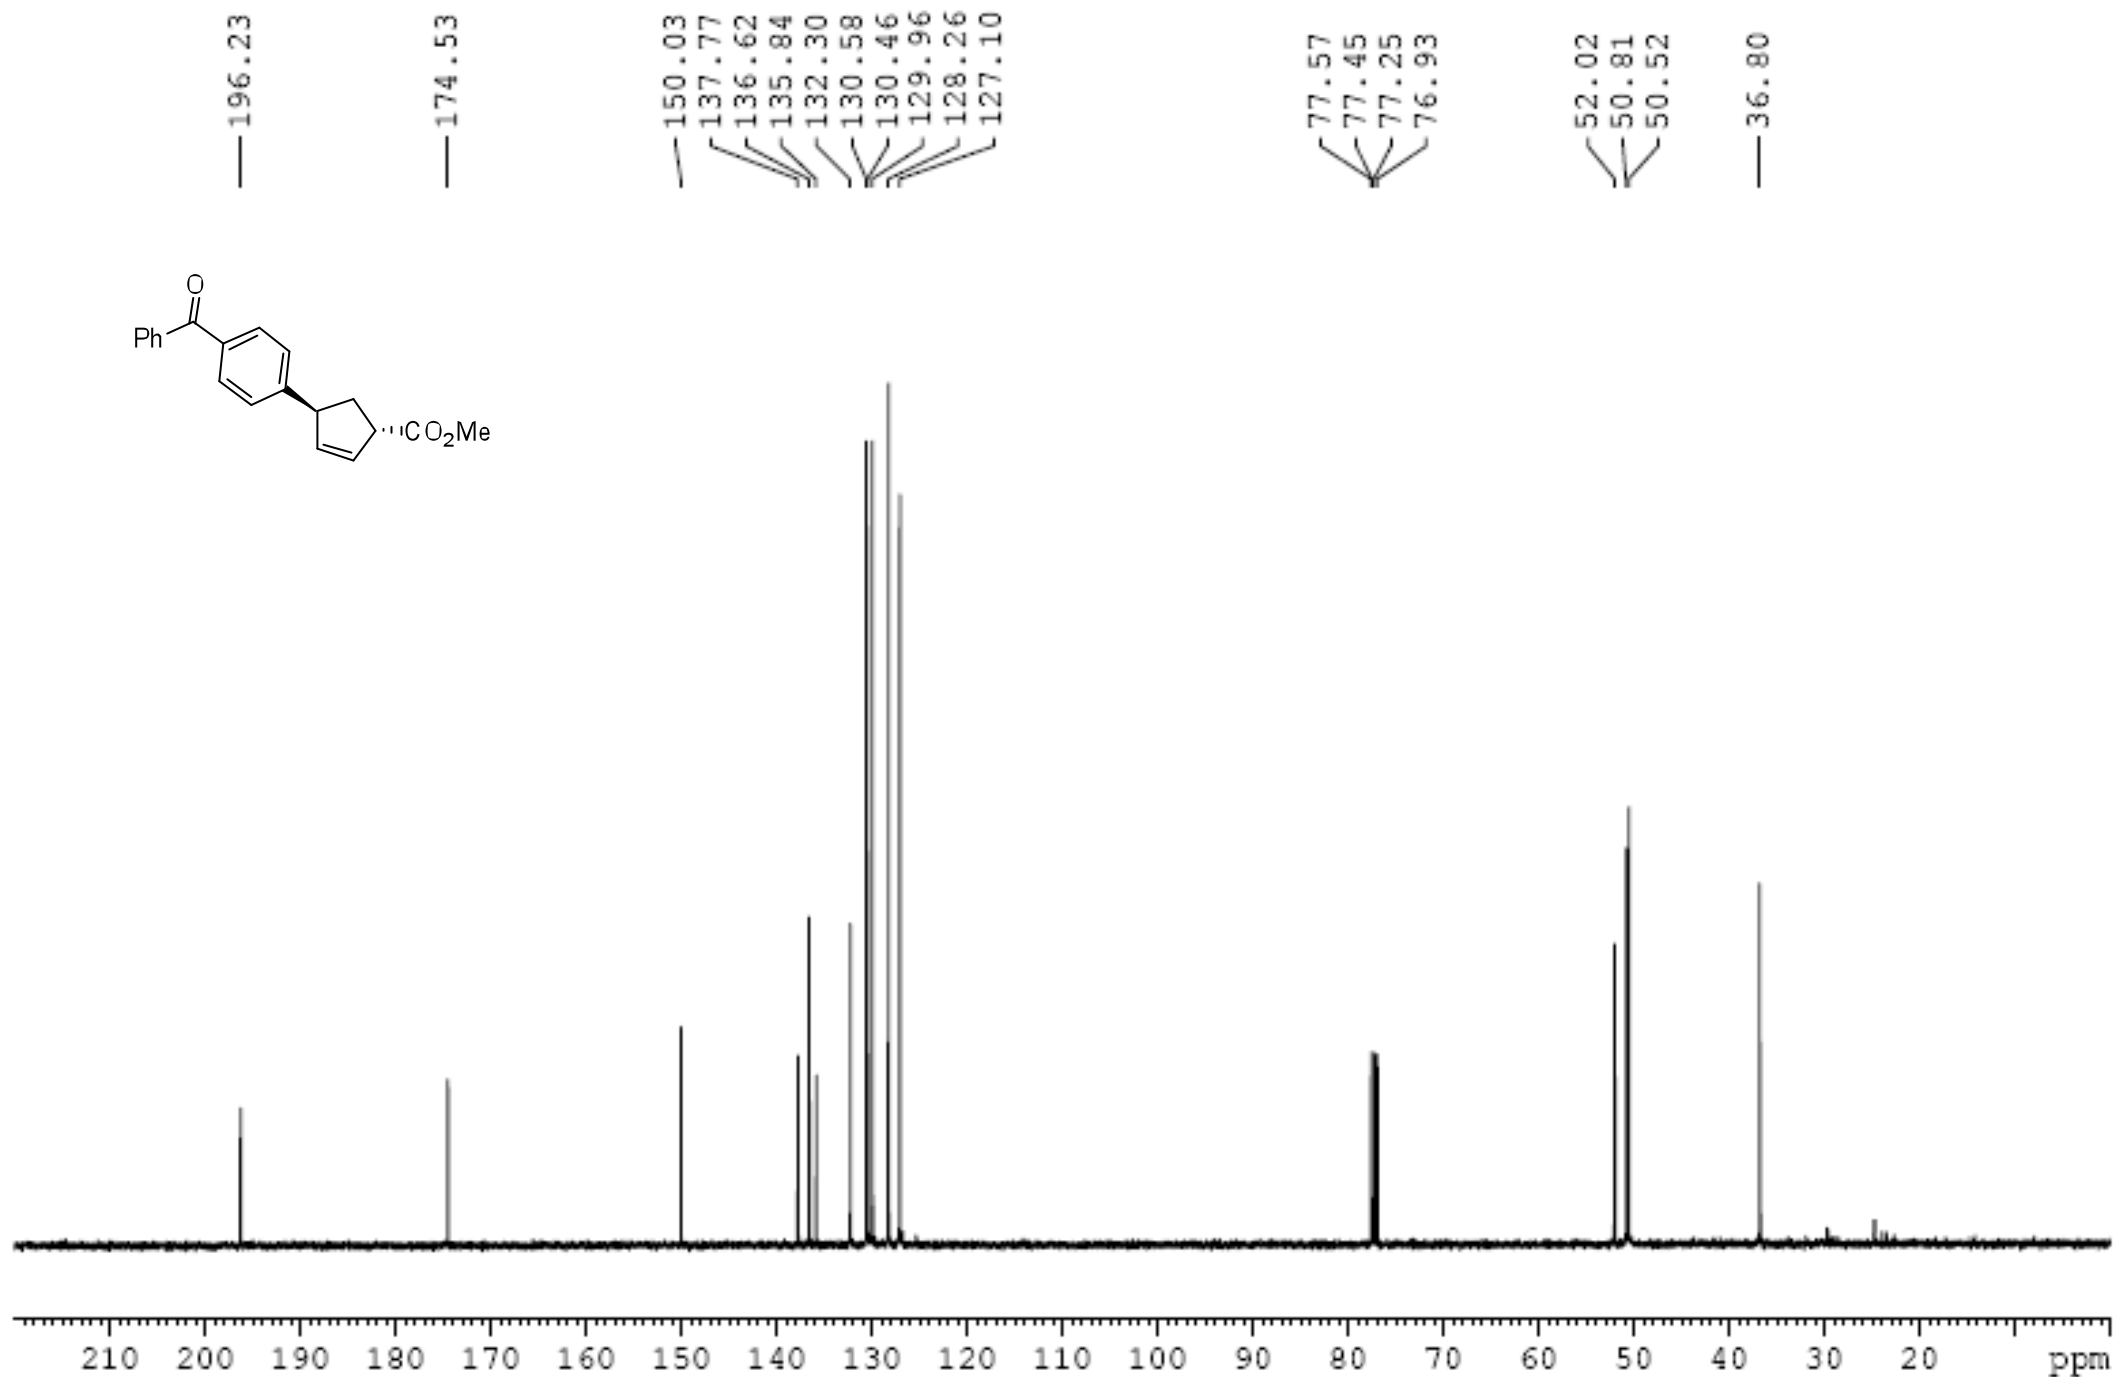



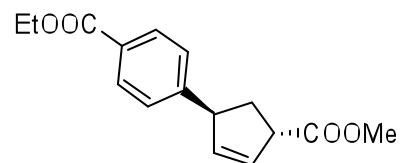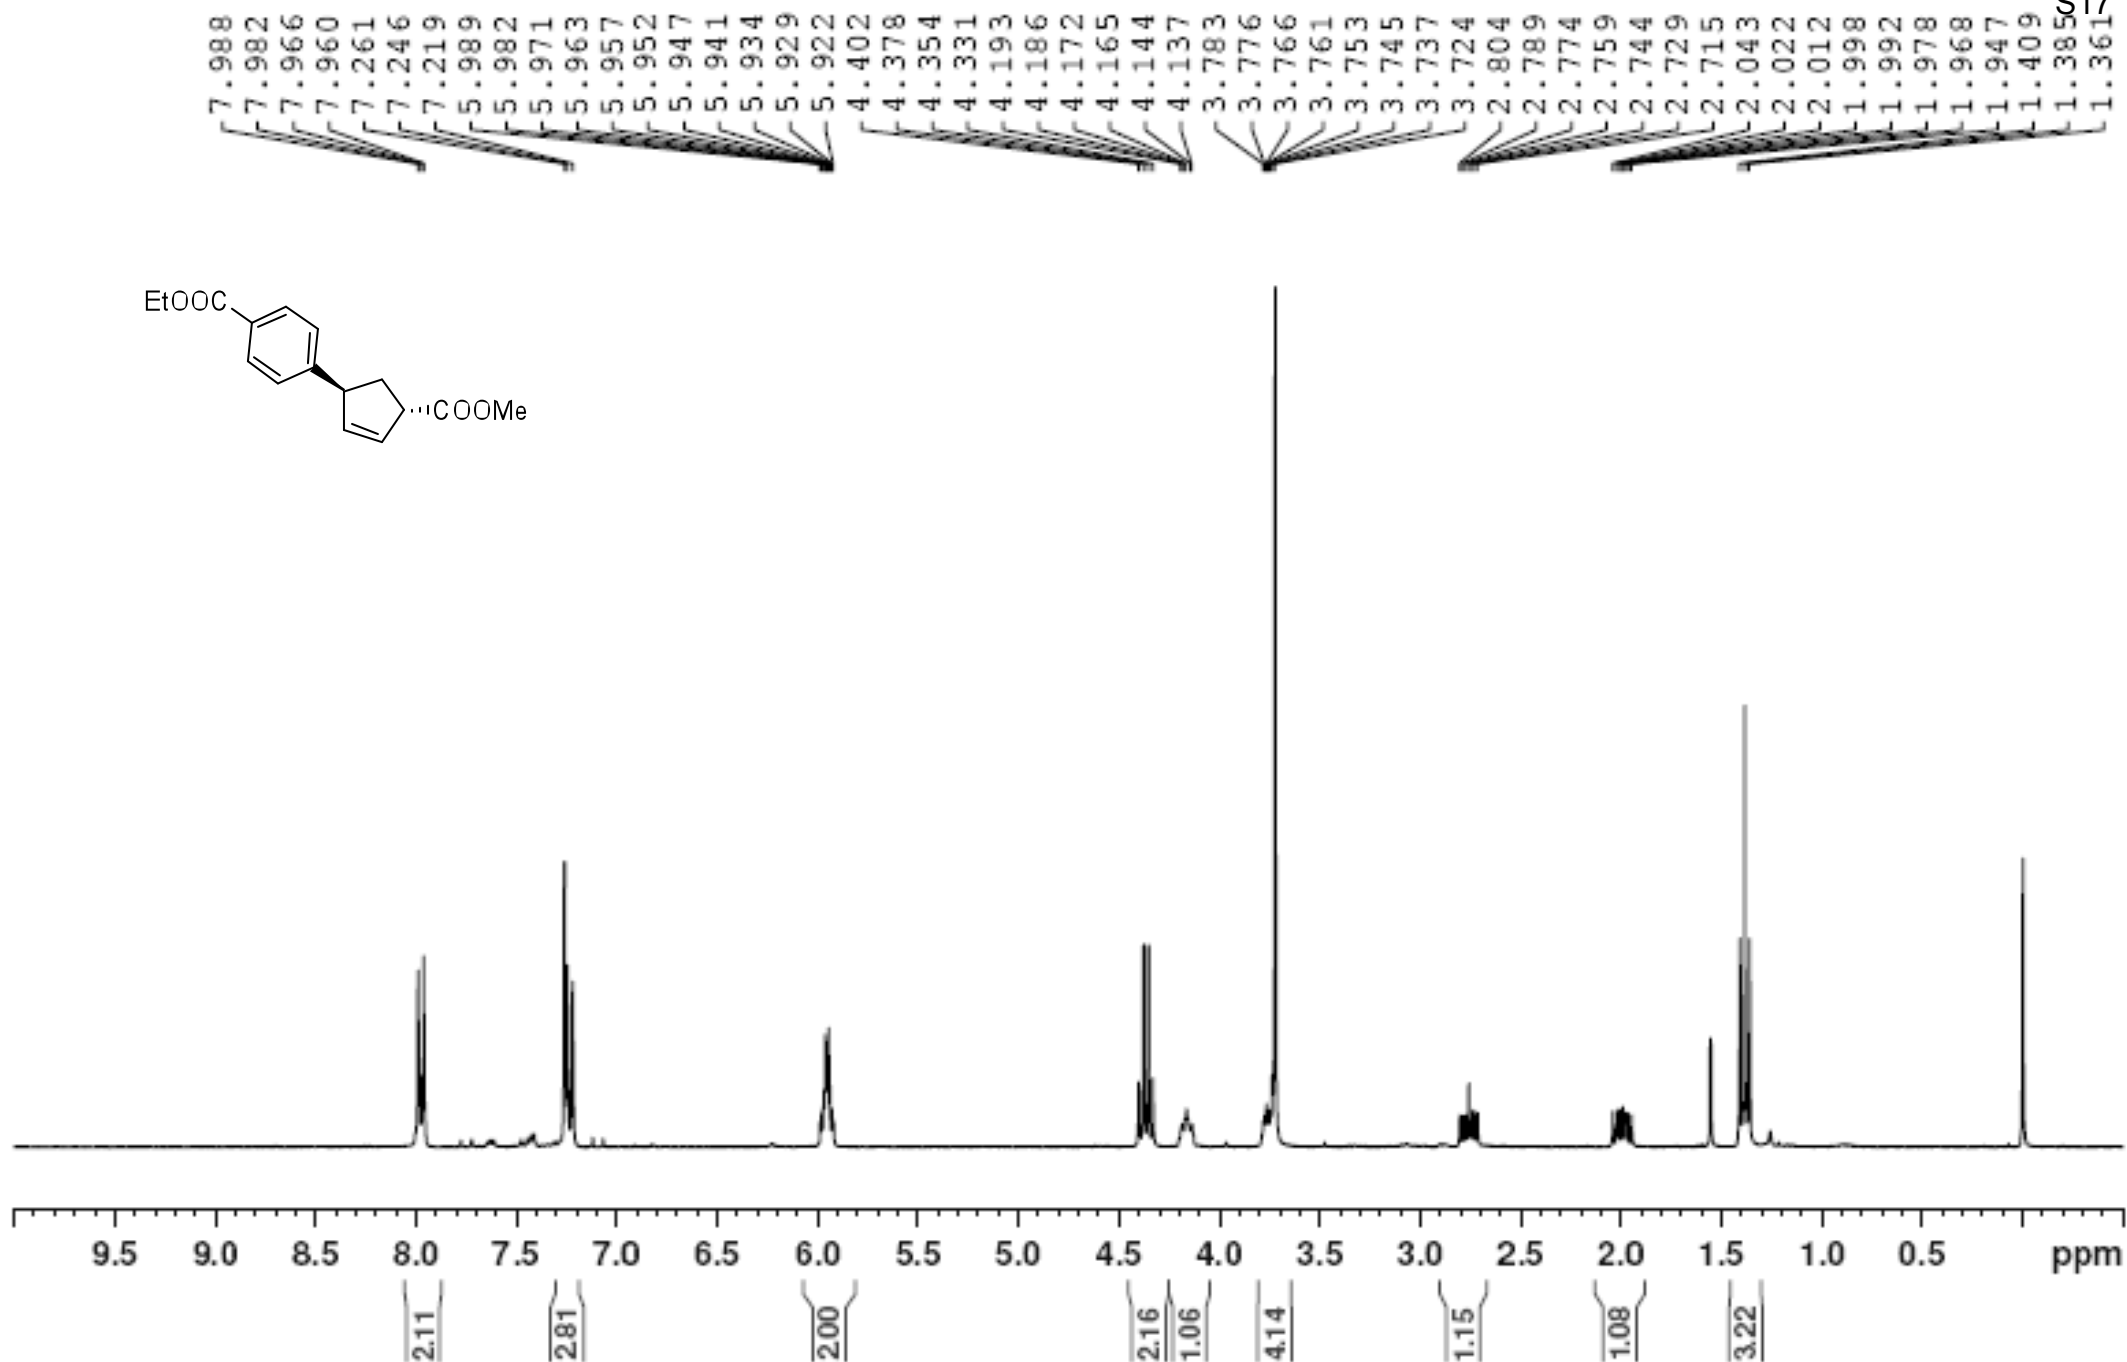

6062-4 AV300 CDCl<sub>3</sub> 06 Dec 2012

S18

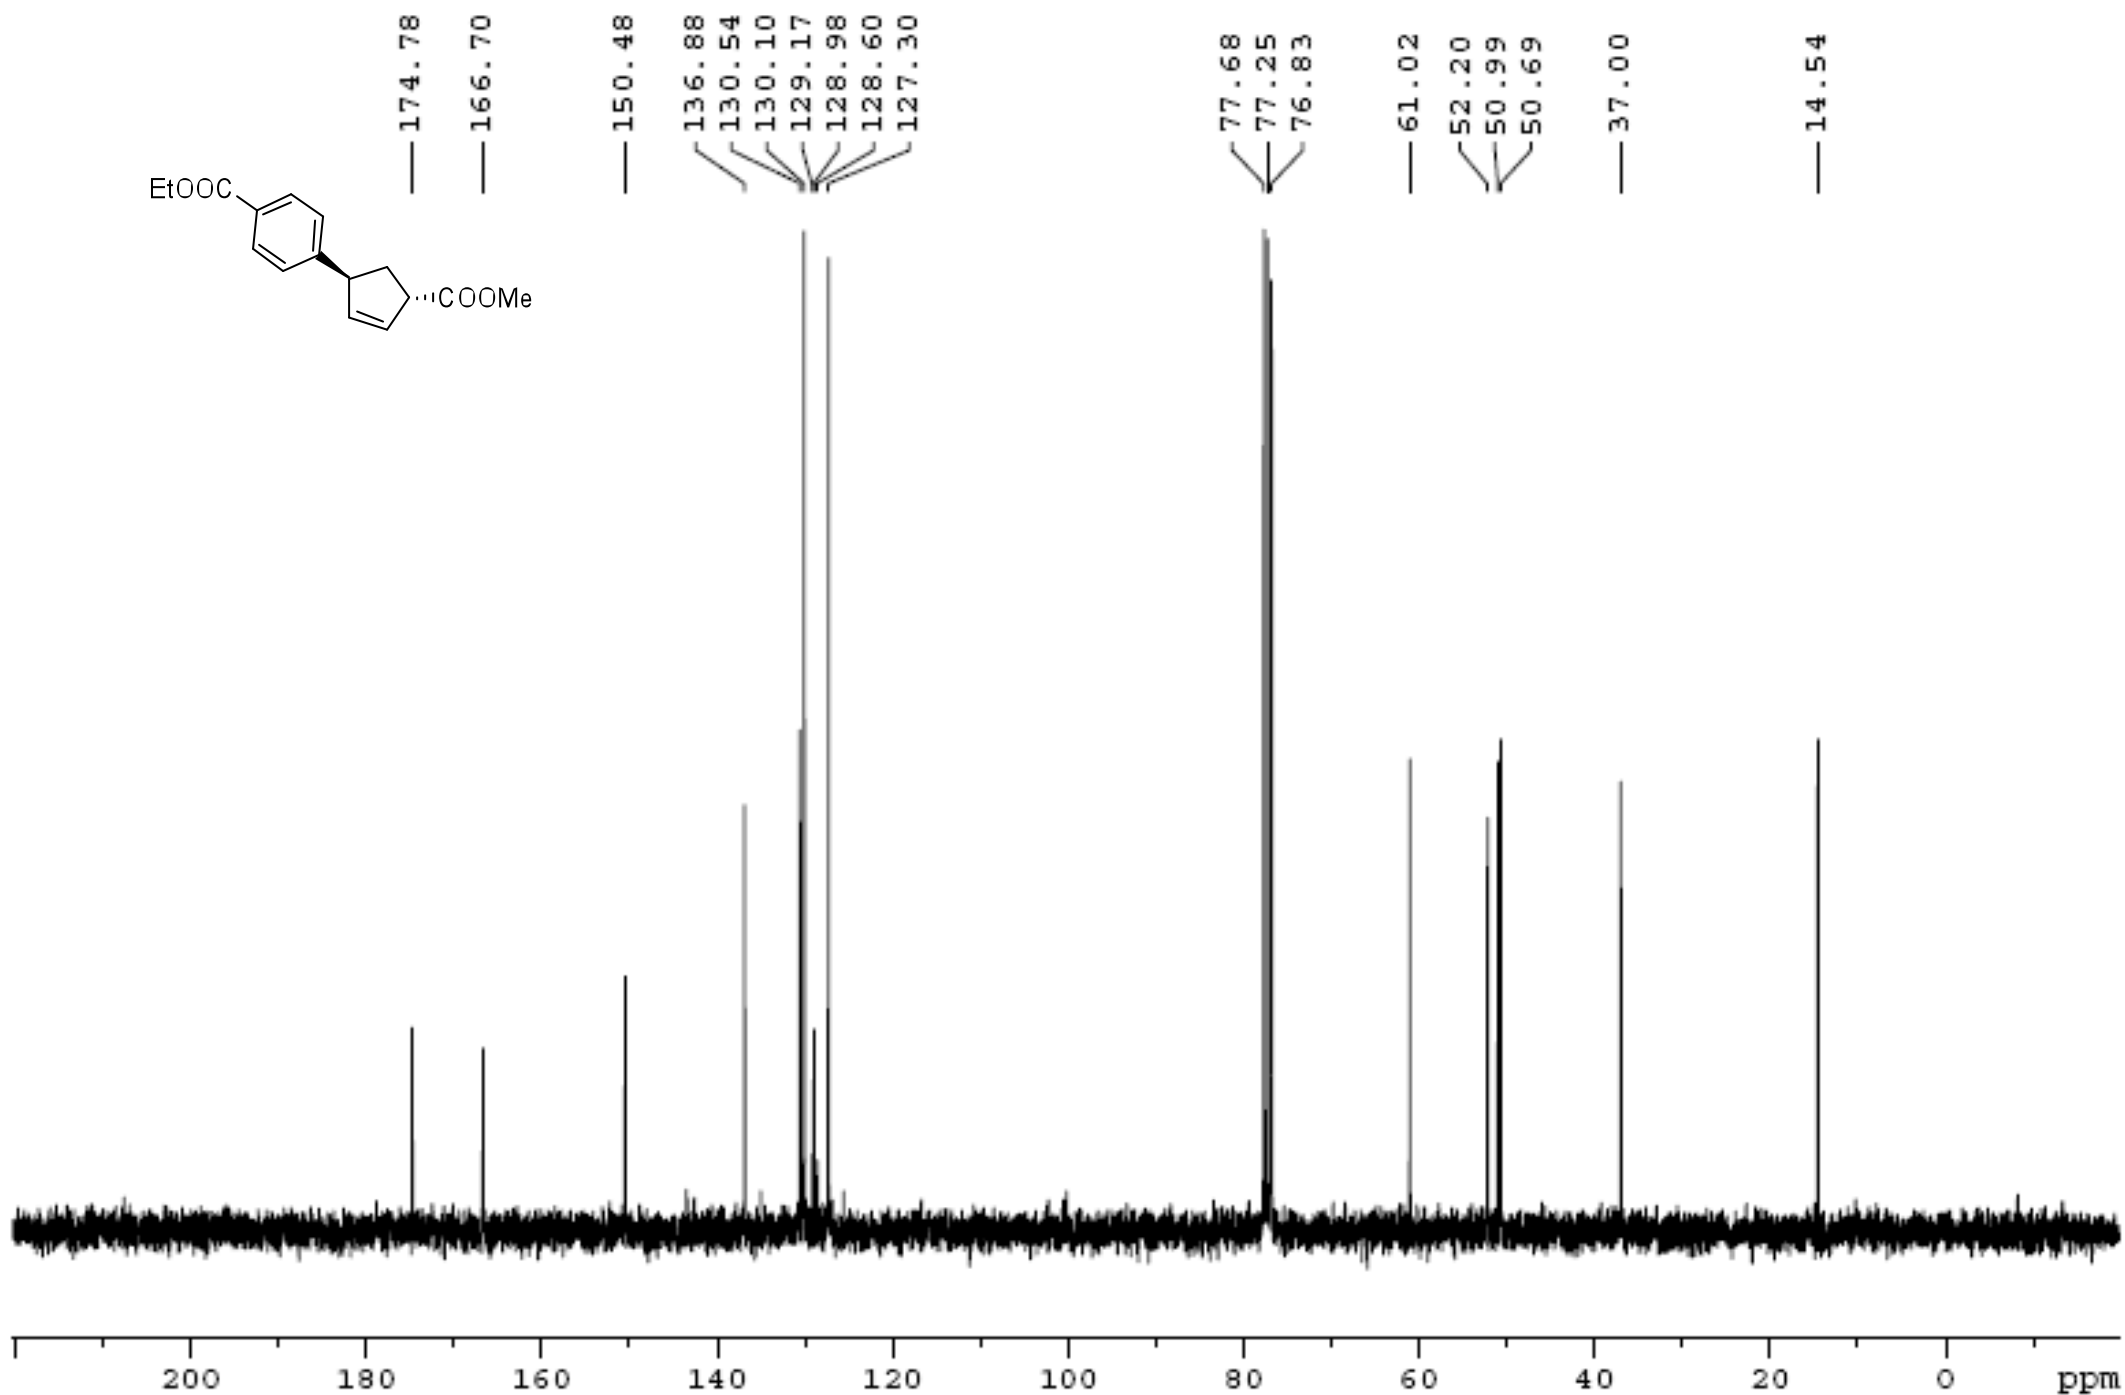

6062-5 AV300 CDC13 05 Dec 2012

S19

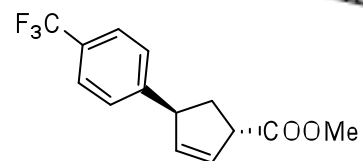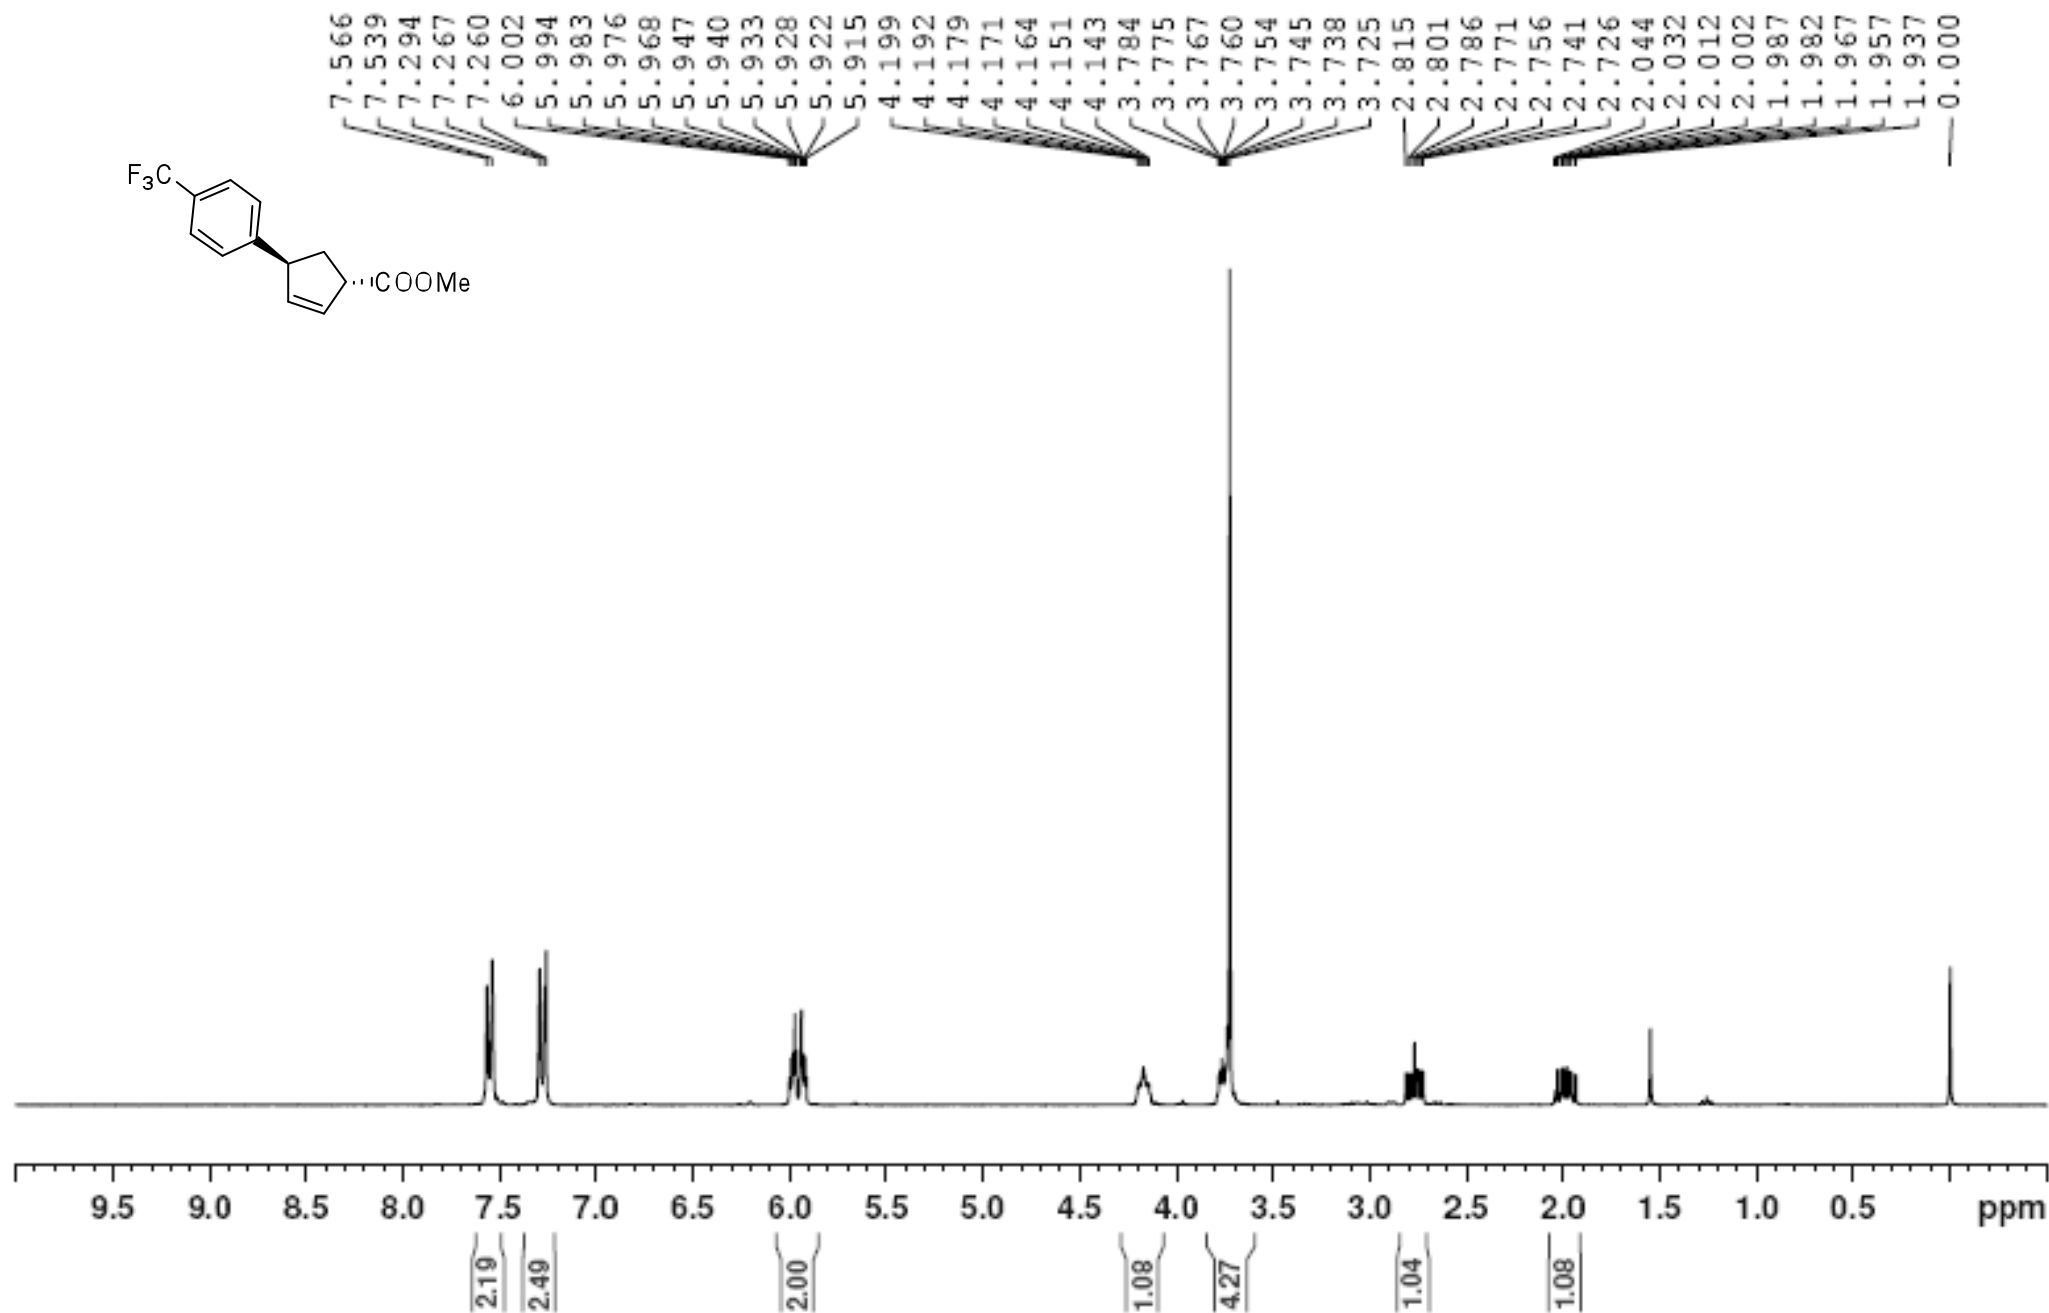

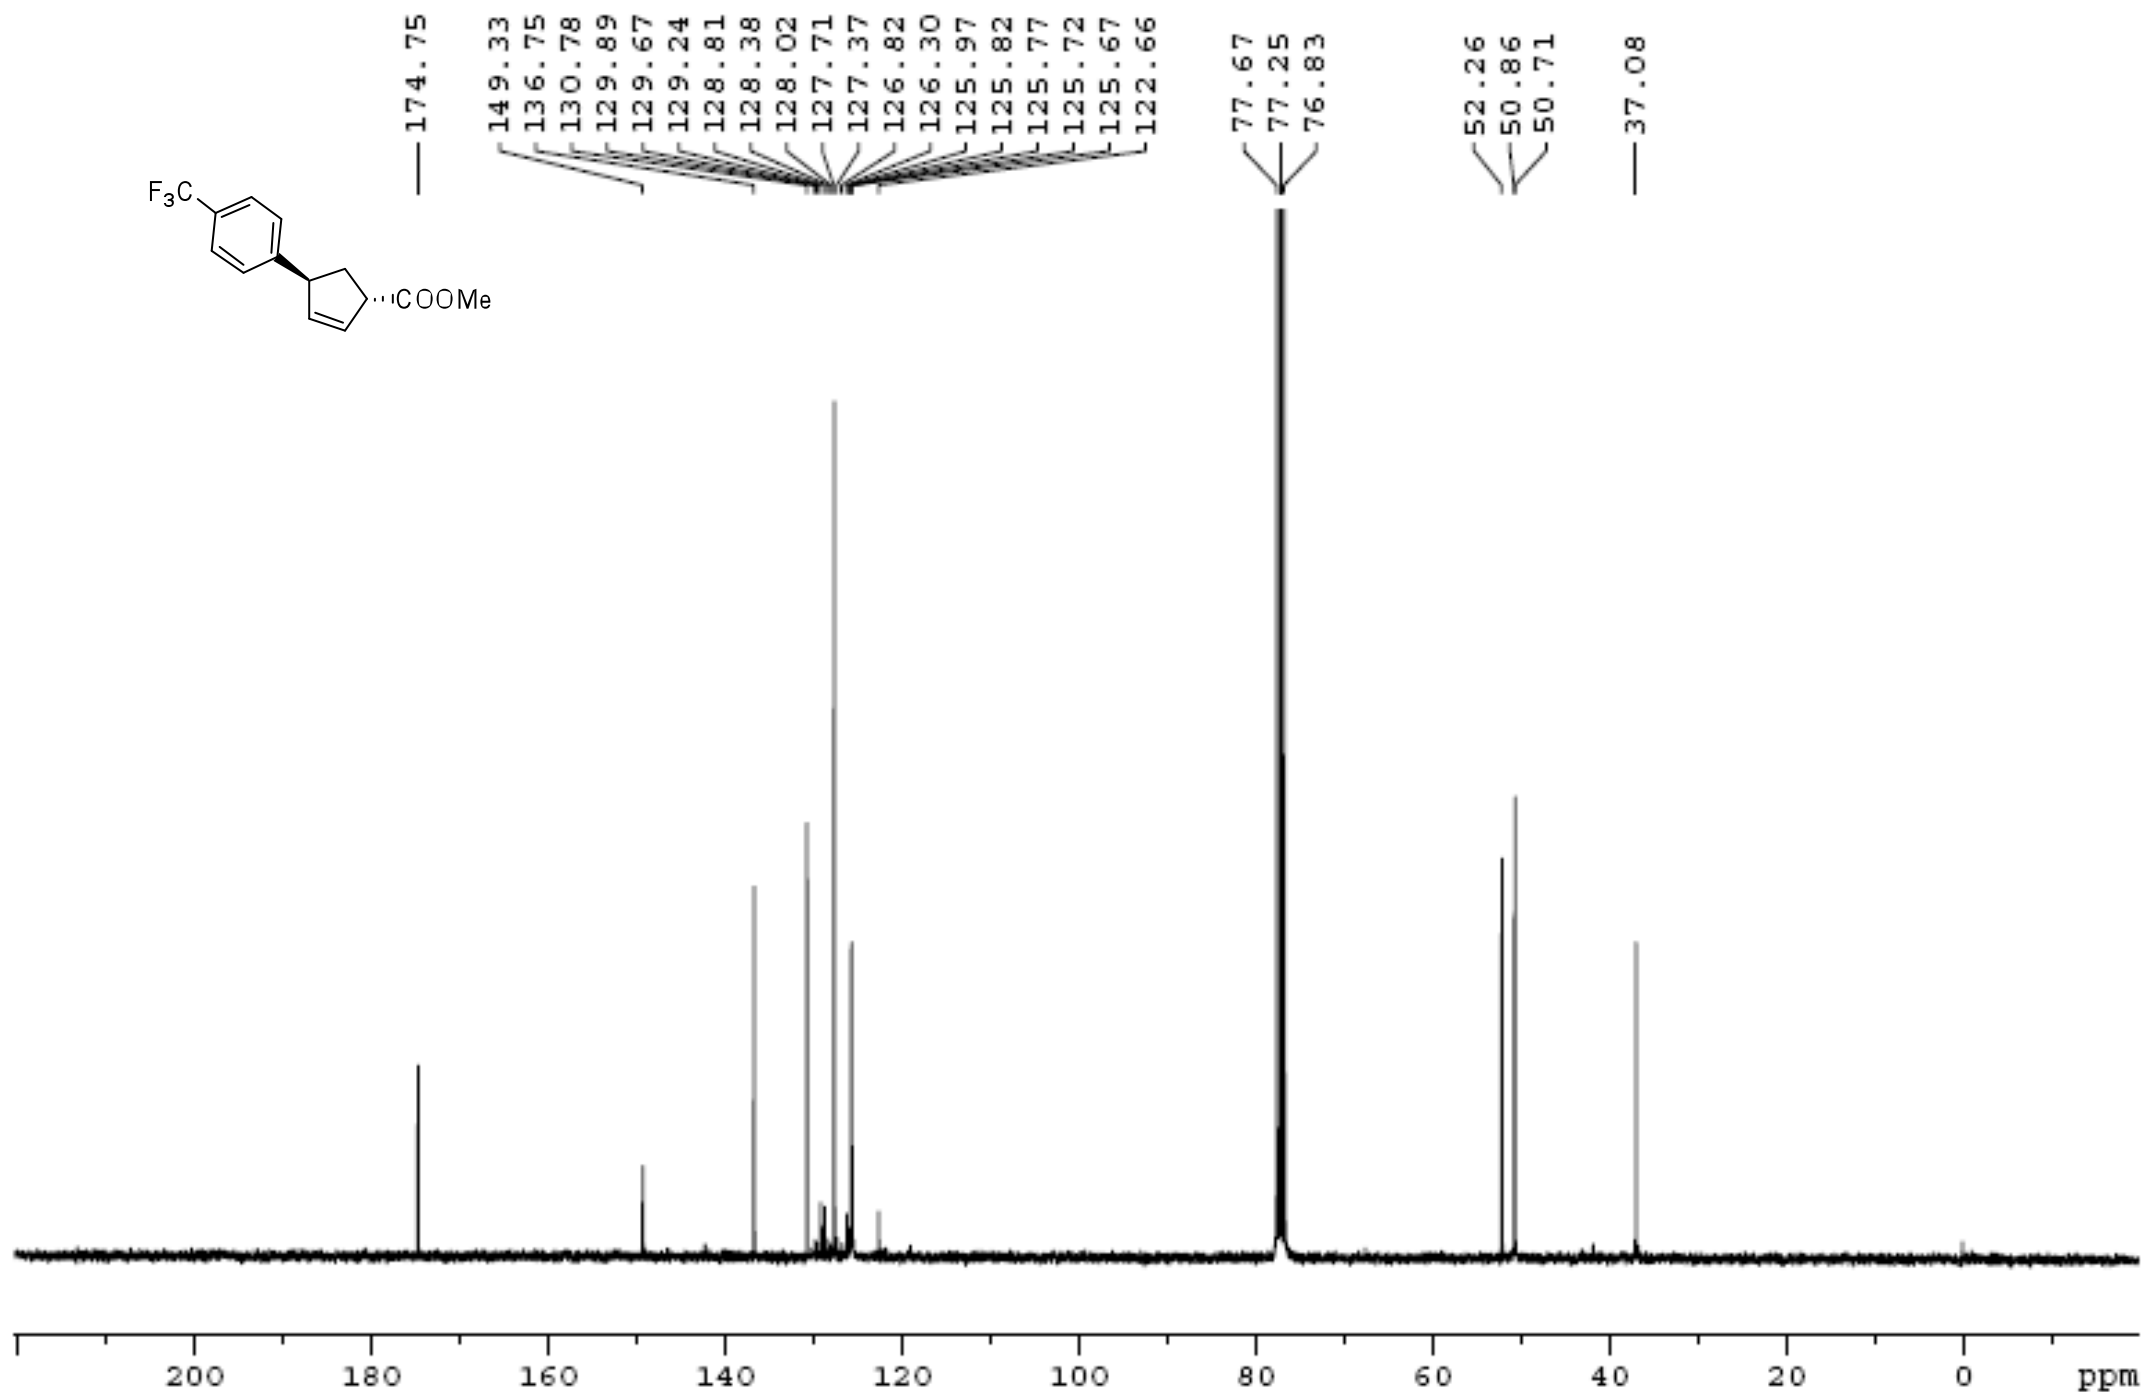

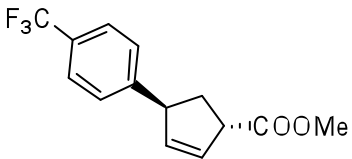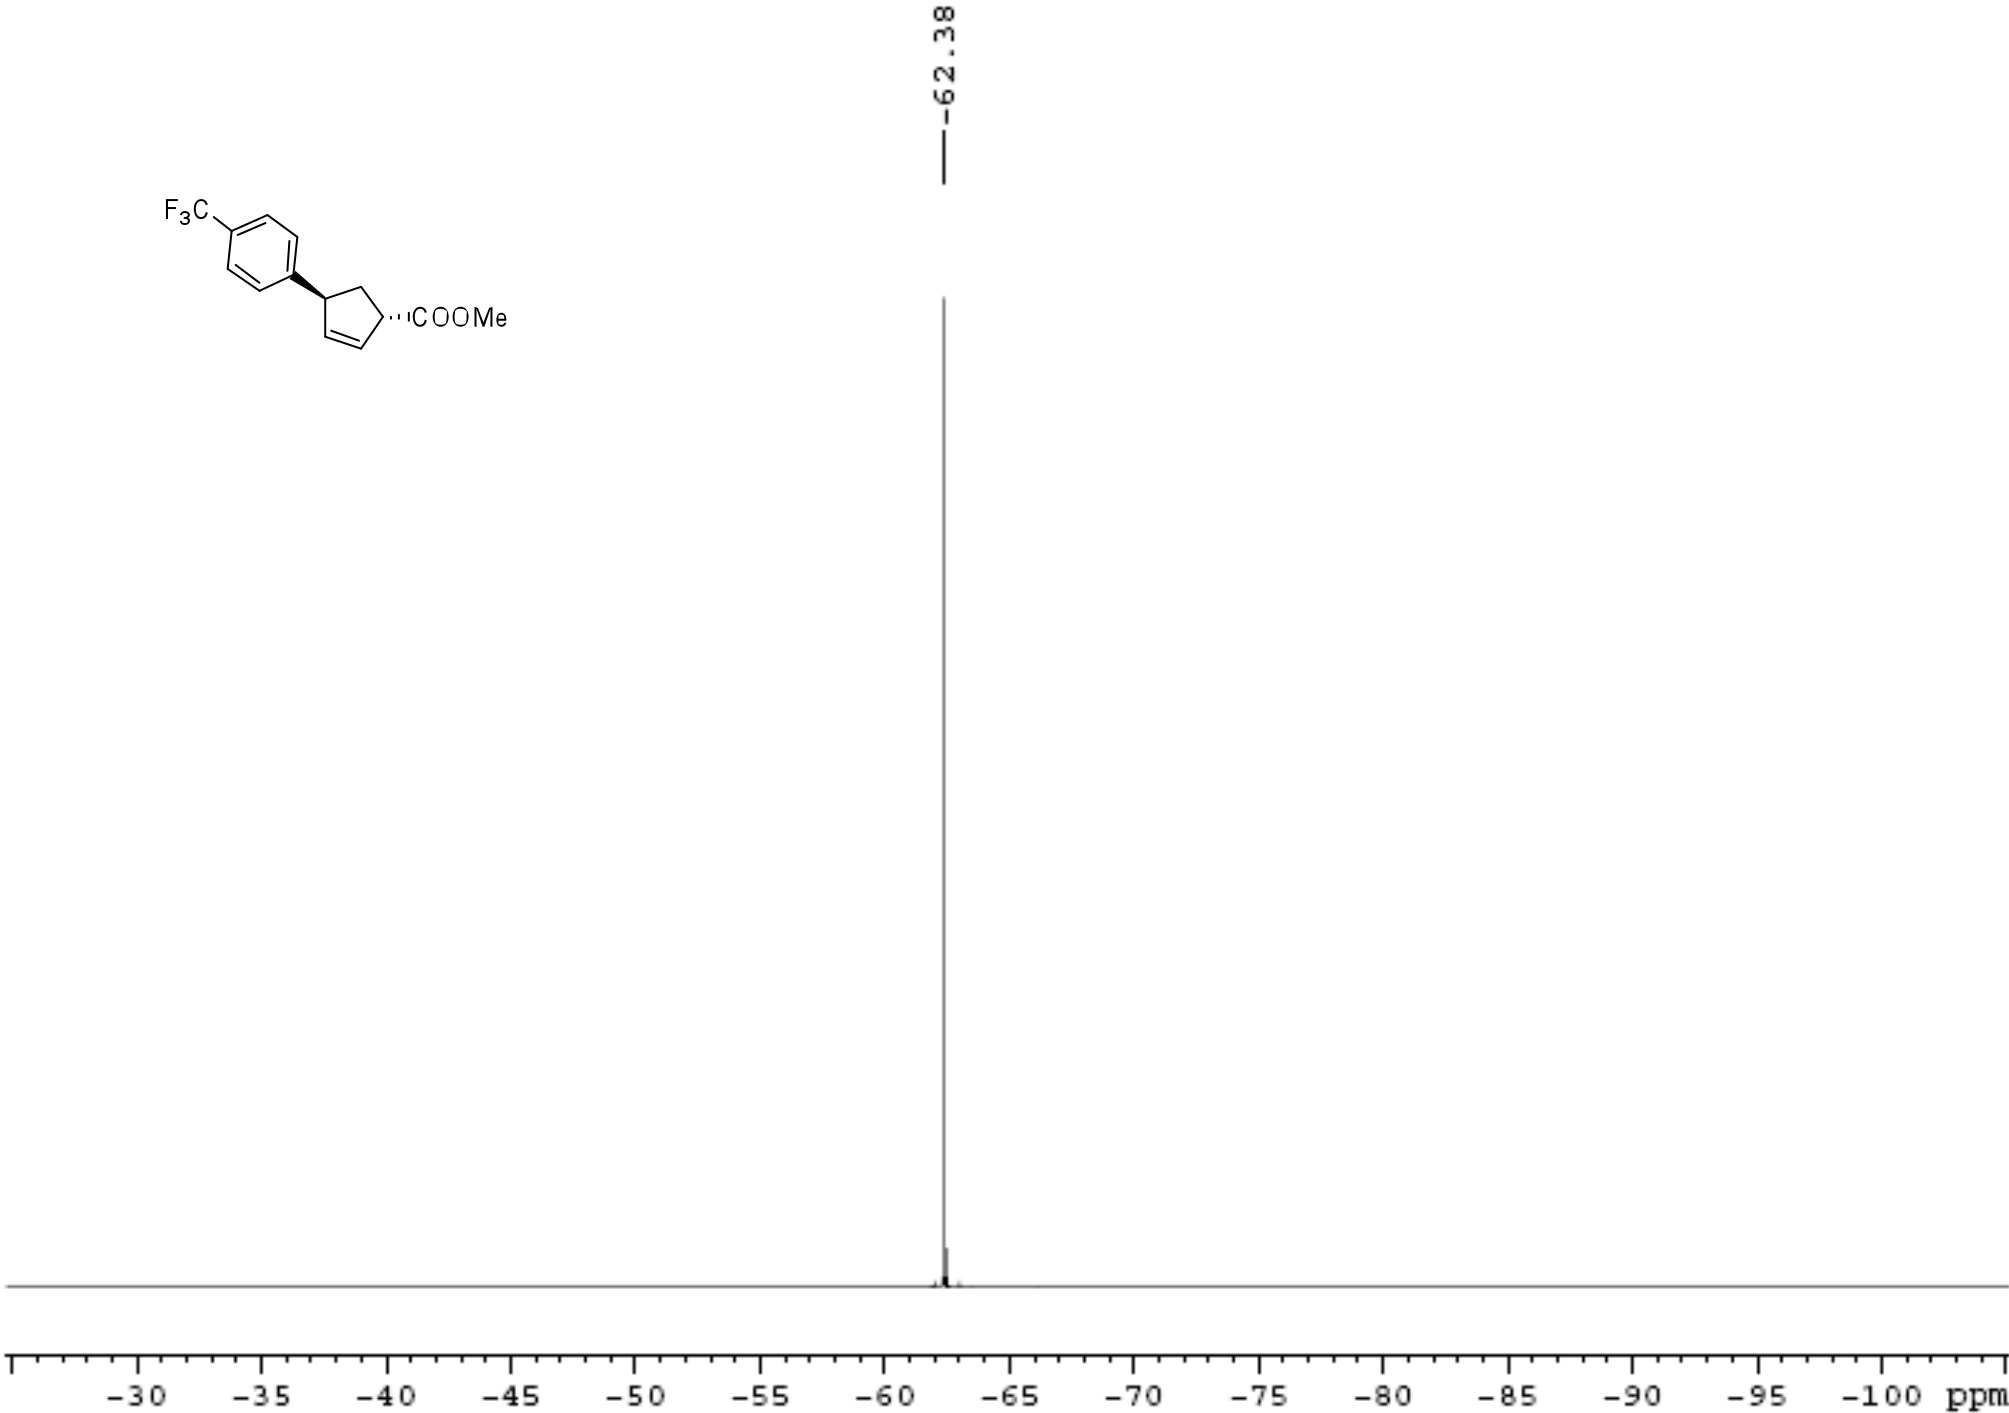

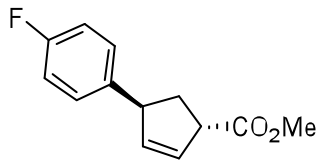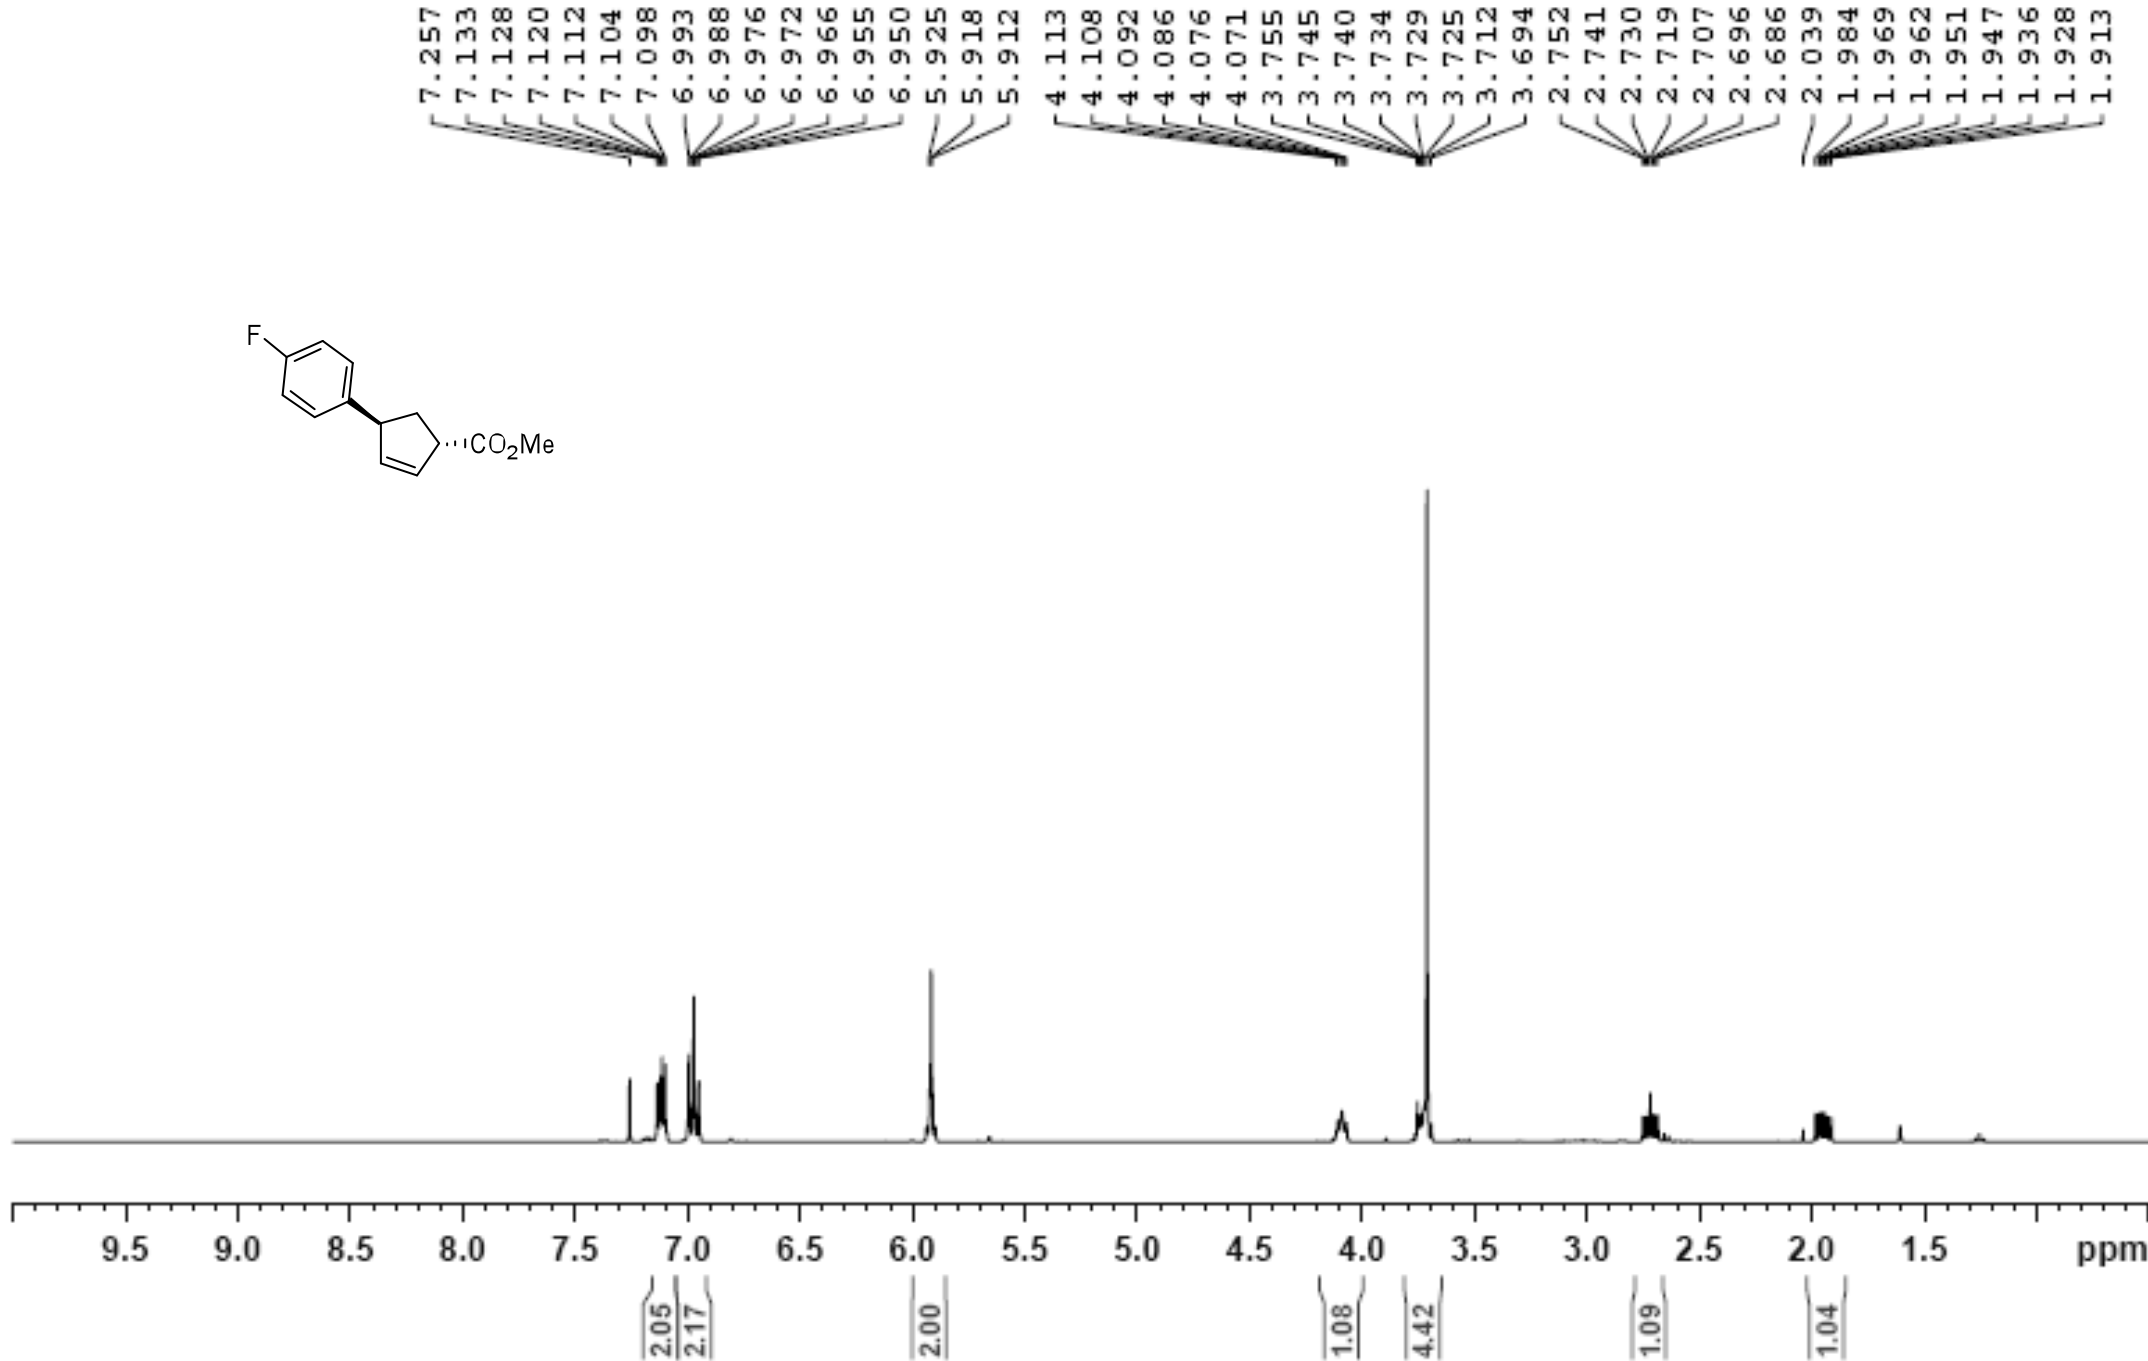

6103-8hmqc AV300 30 July 2013

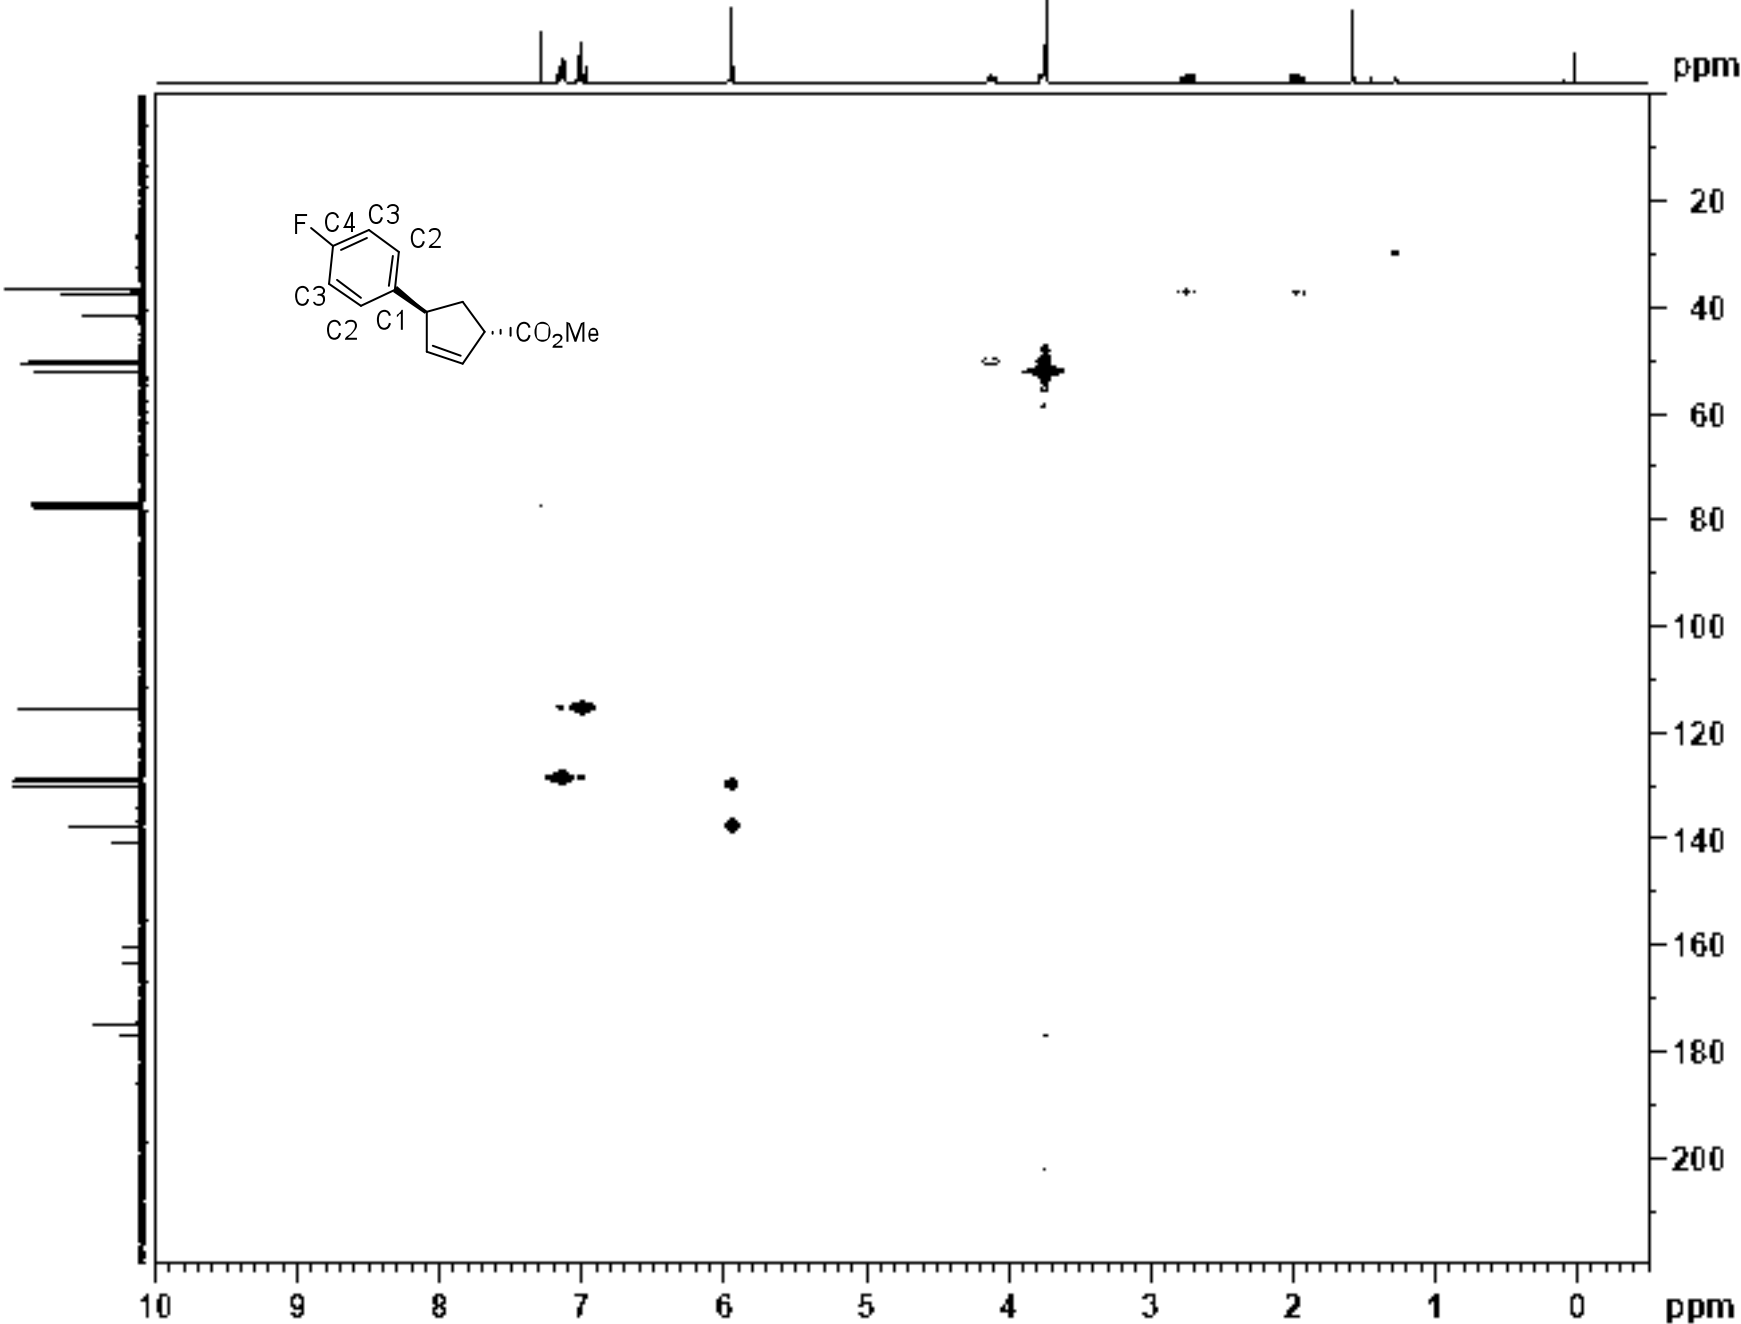

6103-8hmqc AV300 30 July 2013

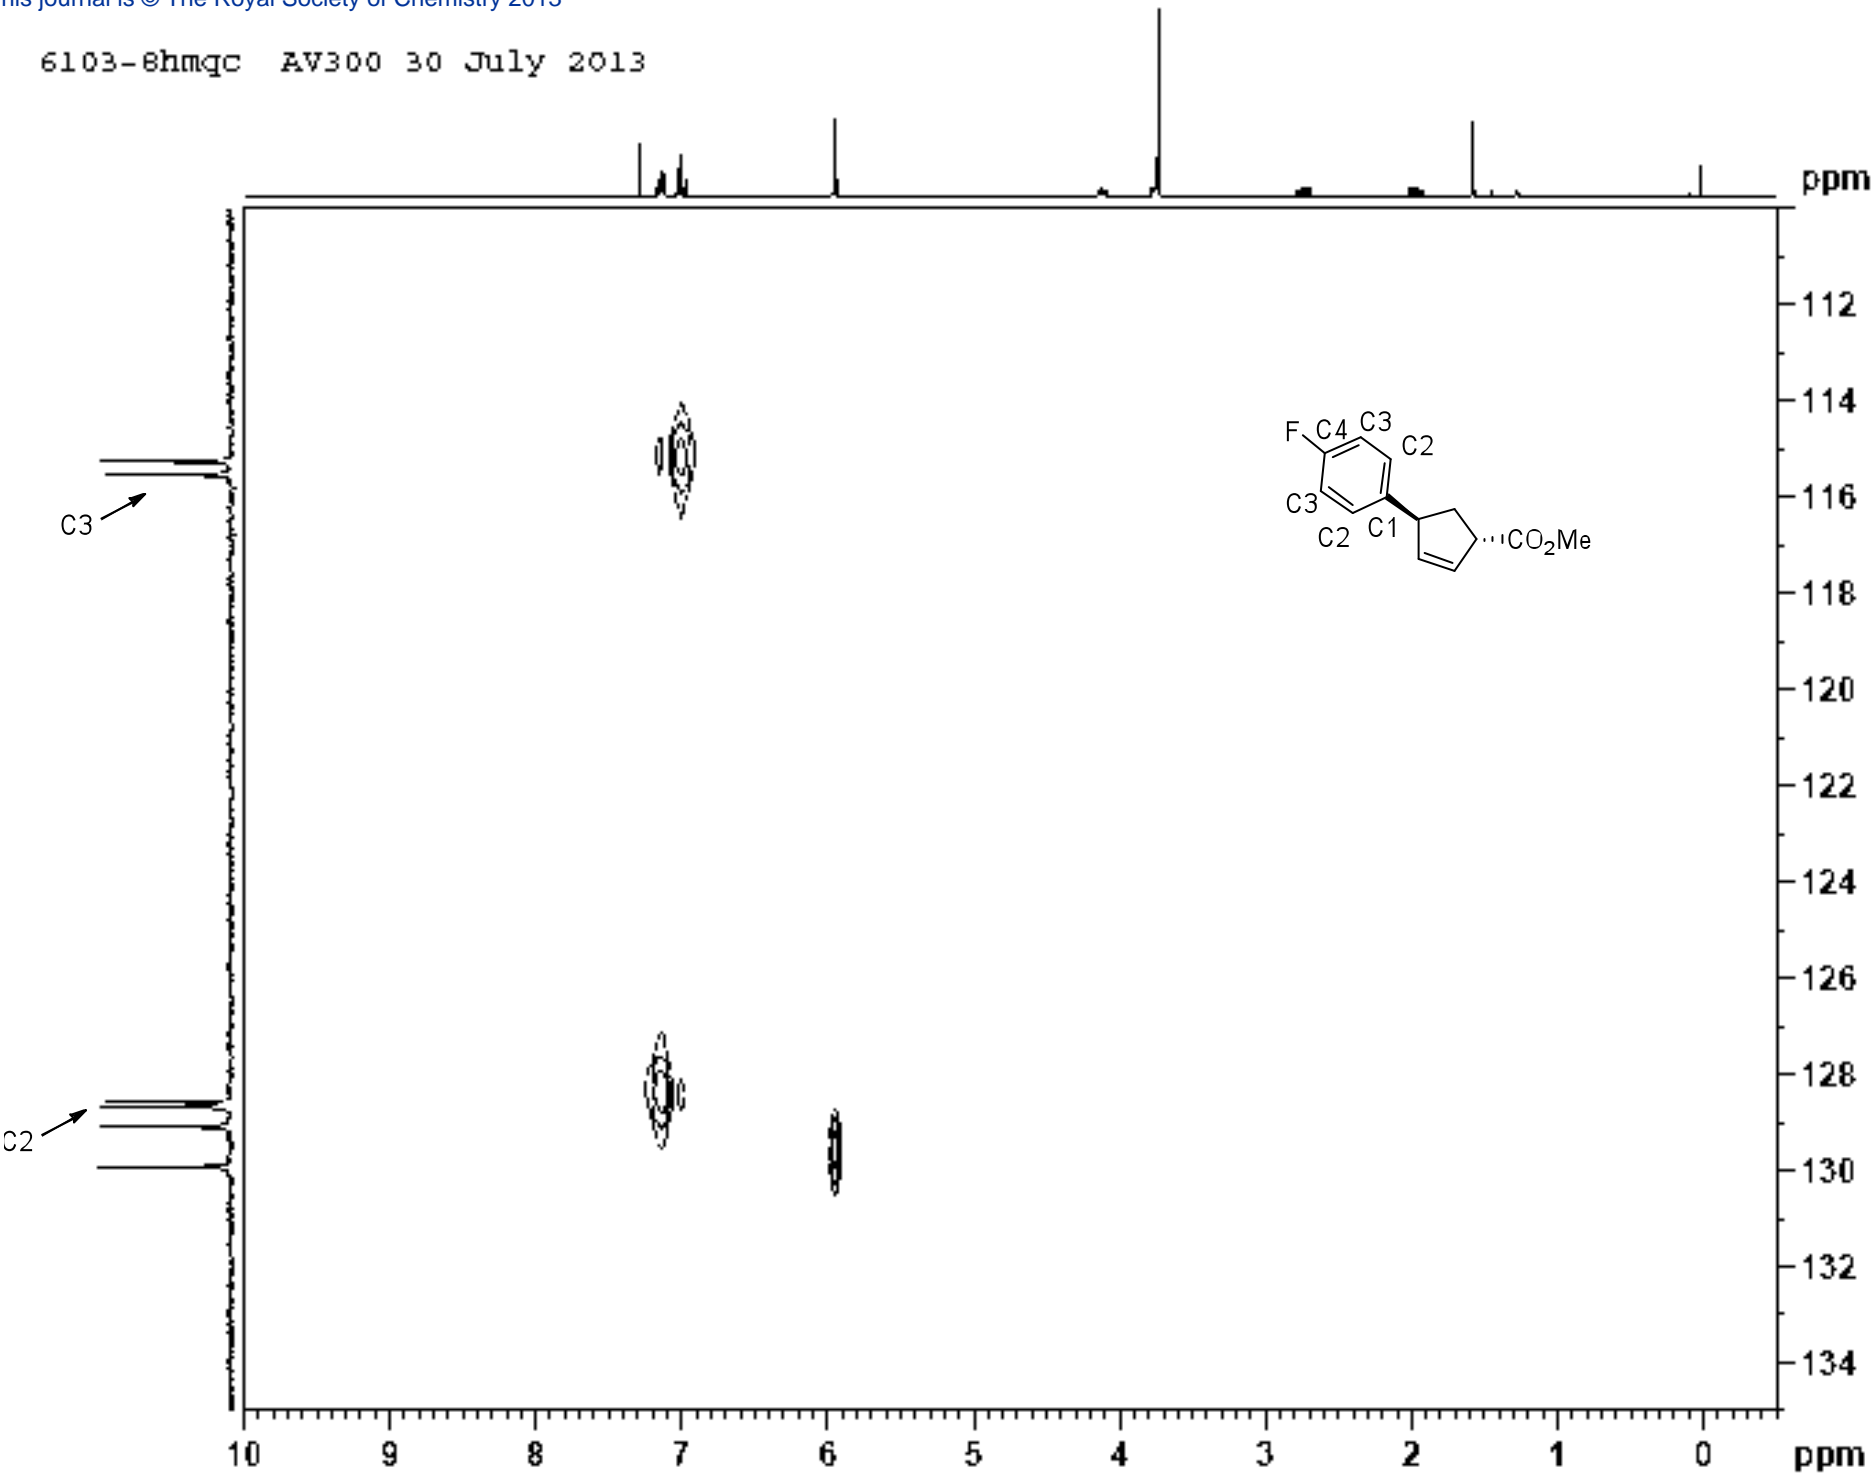



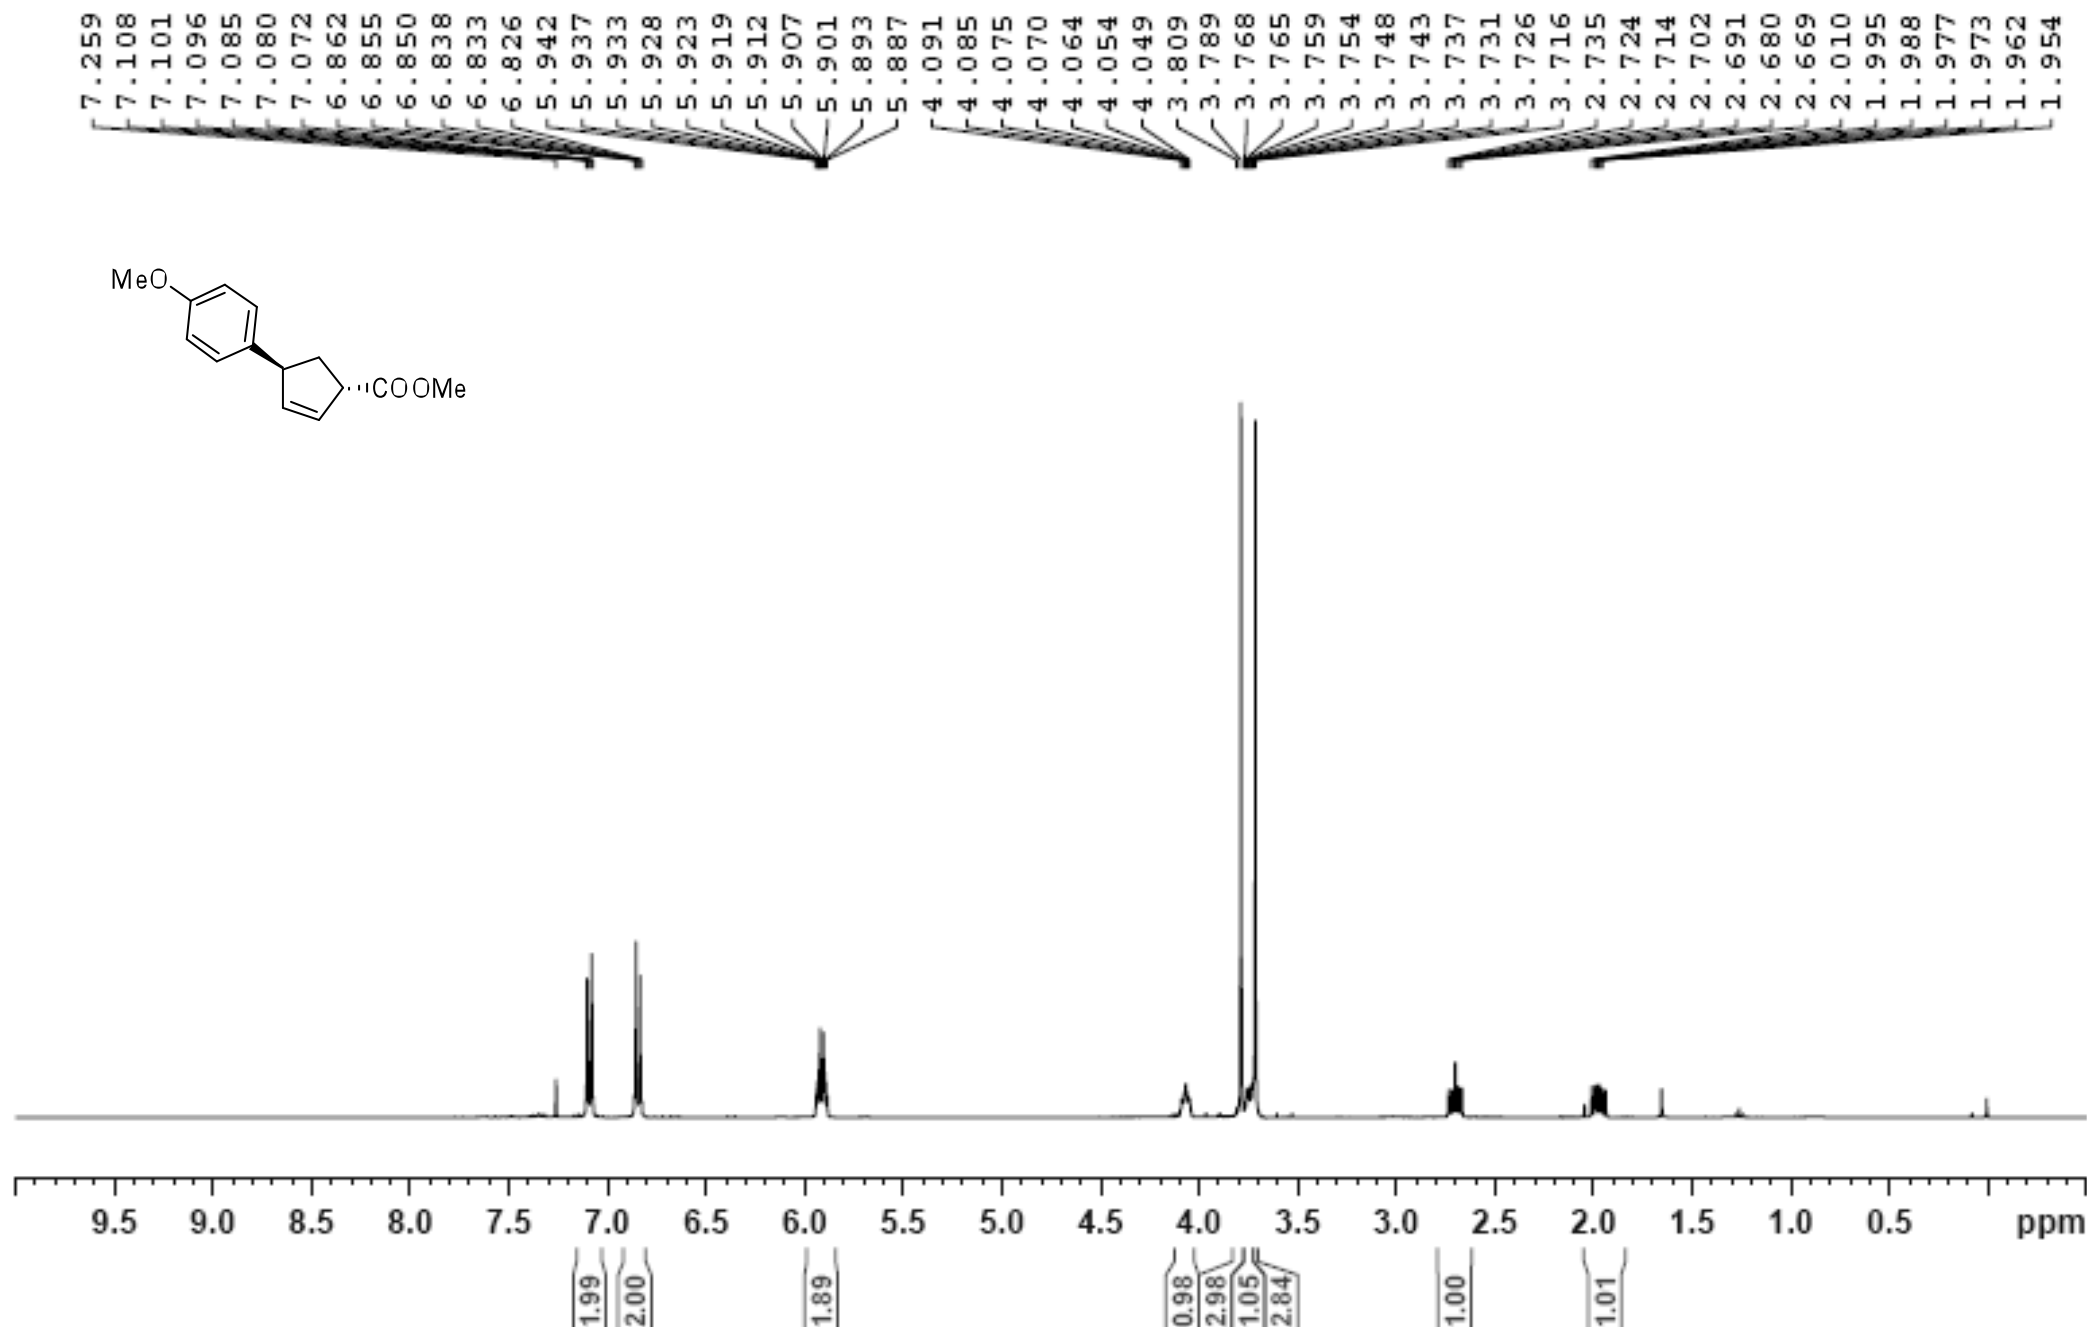

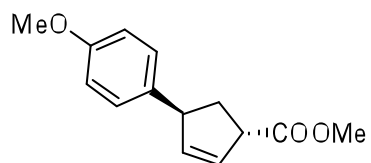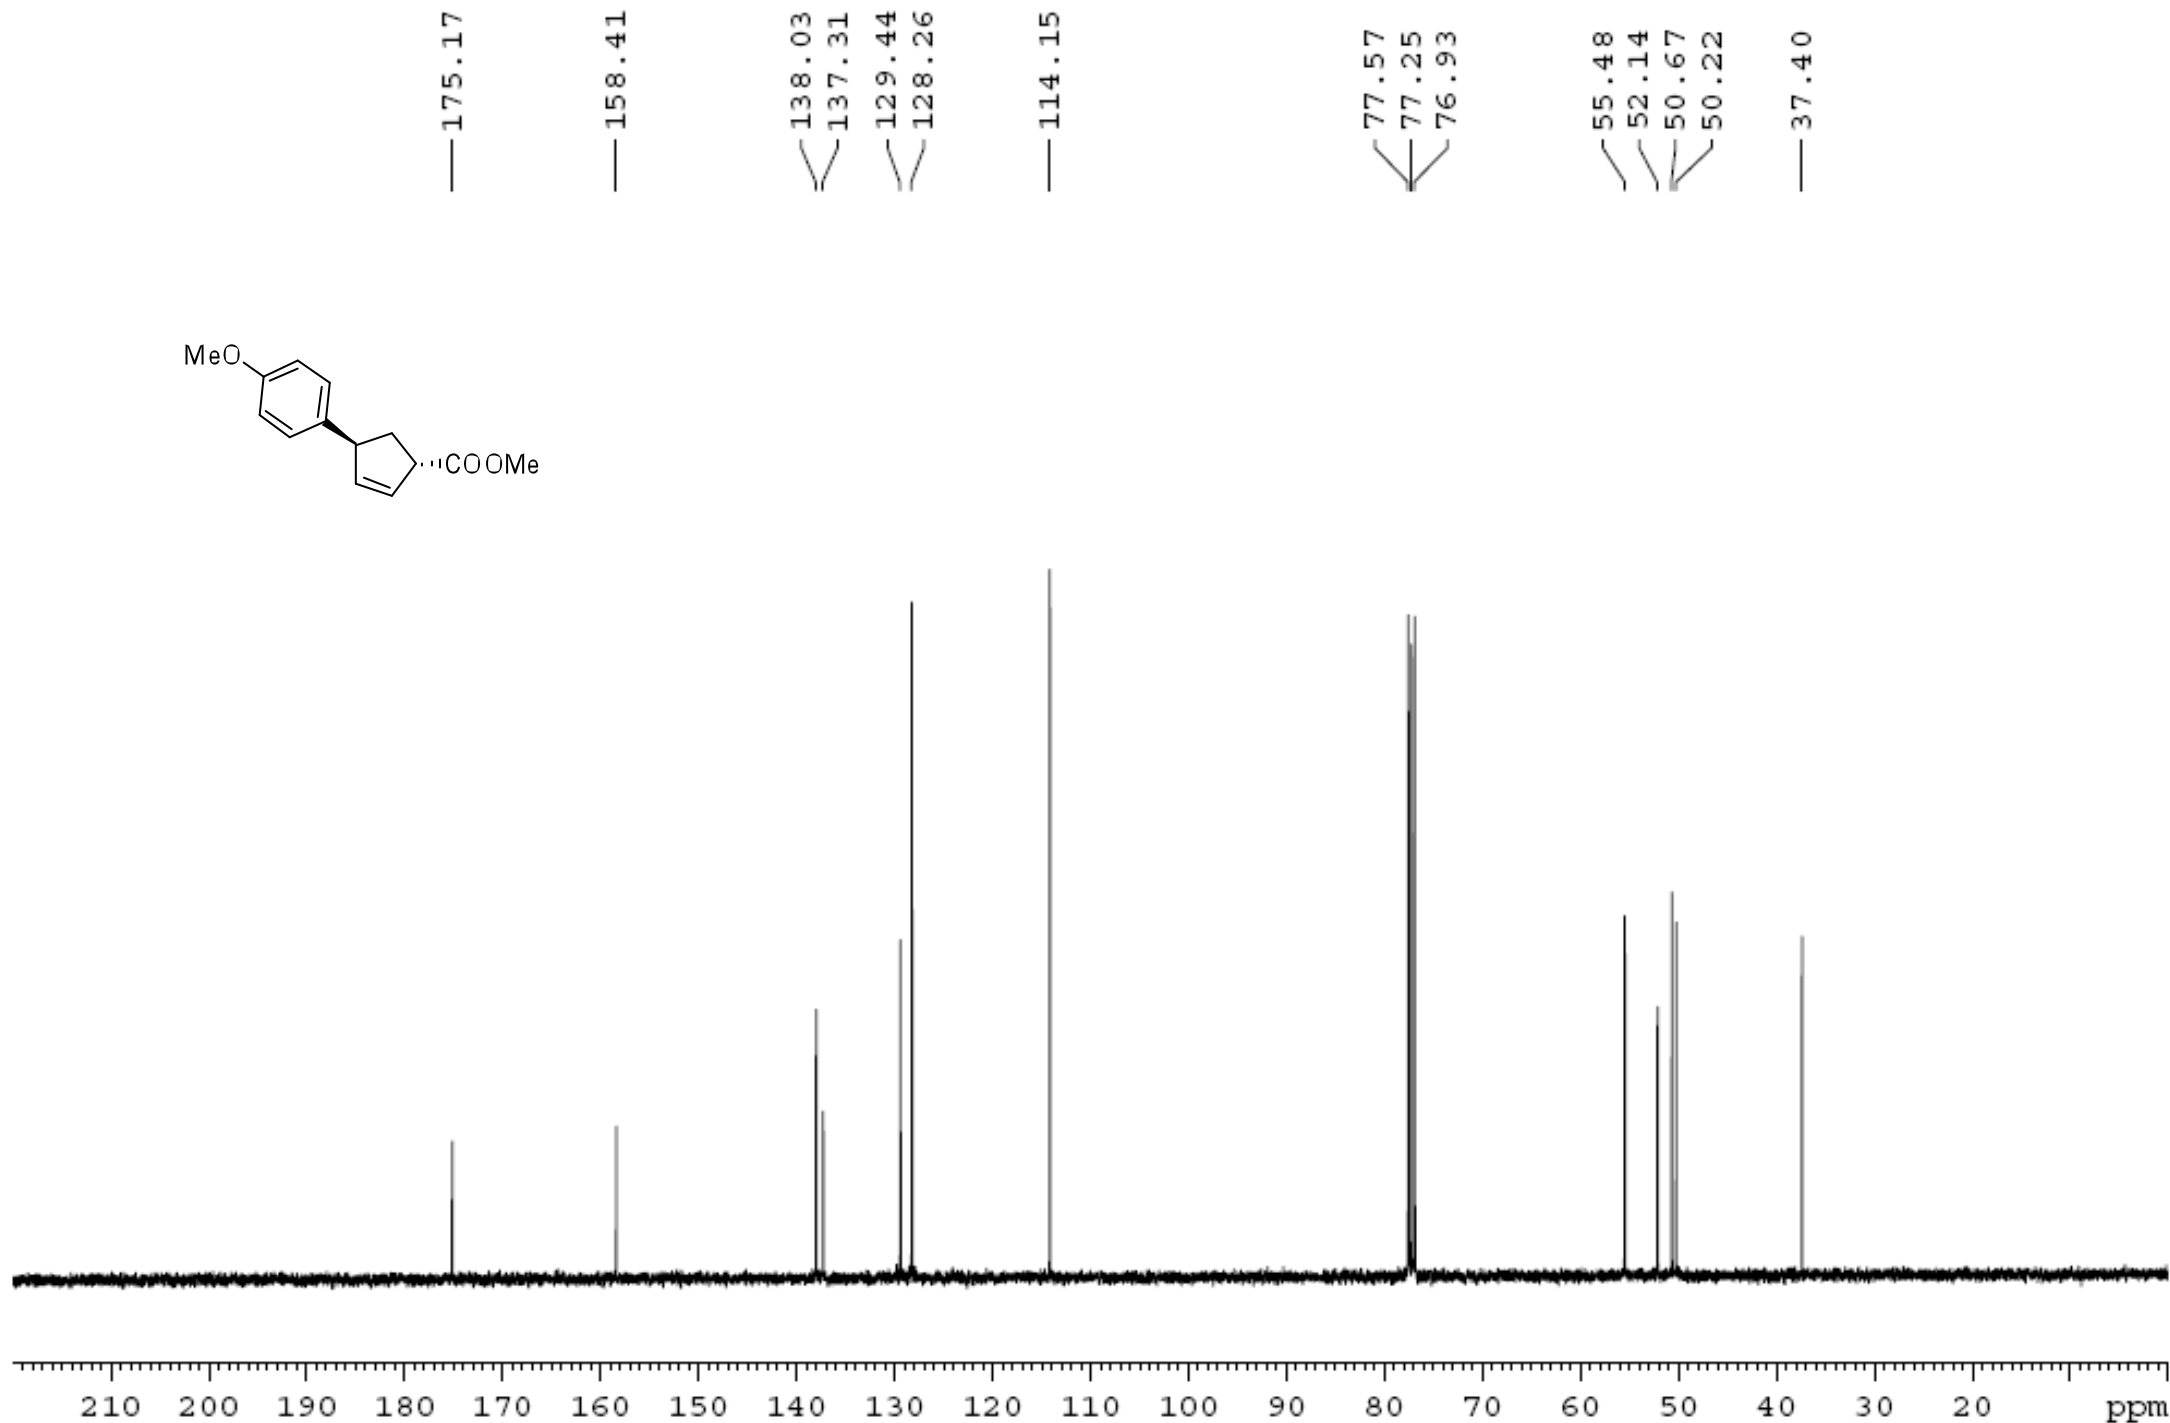

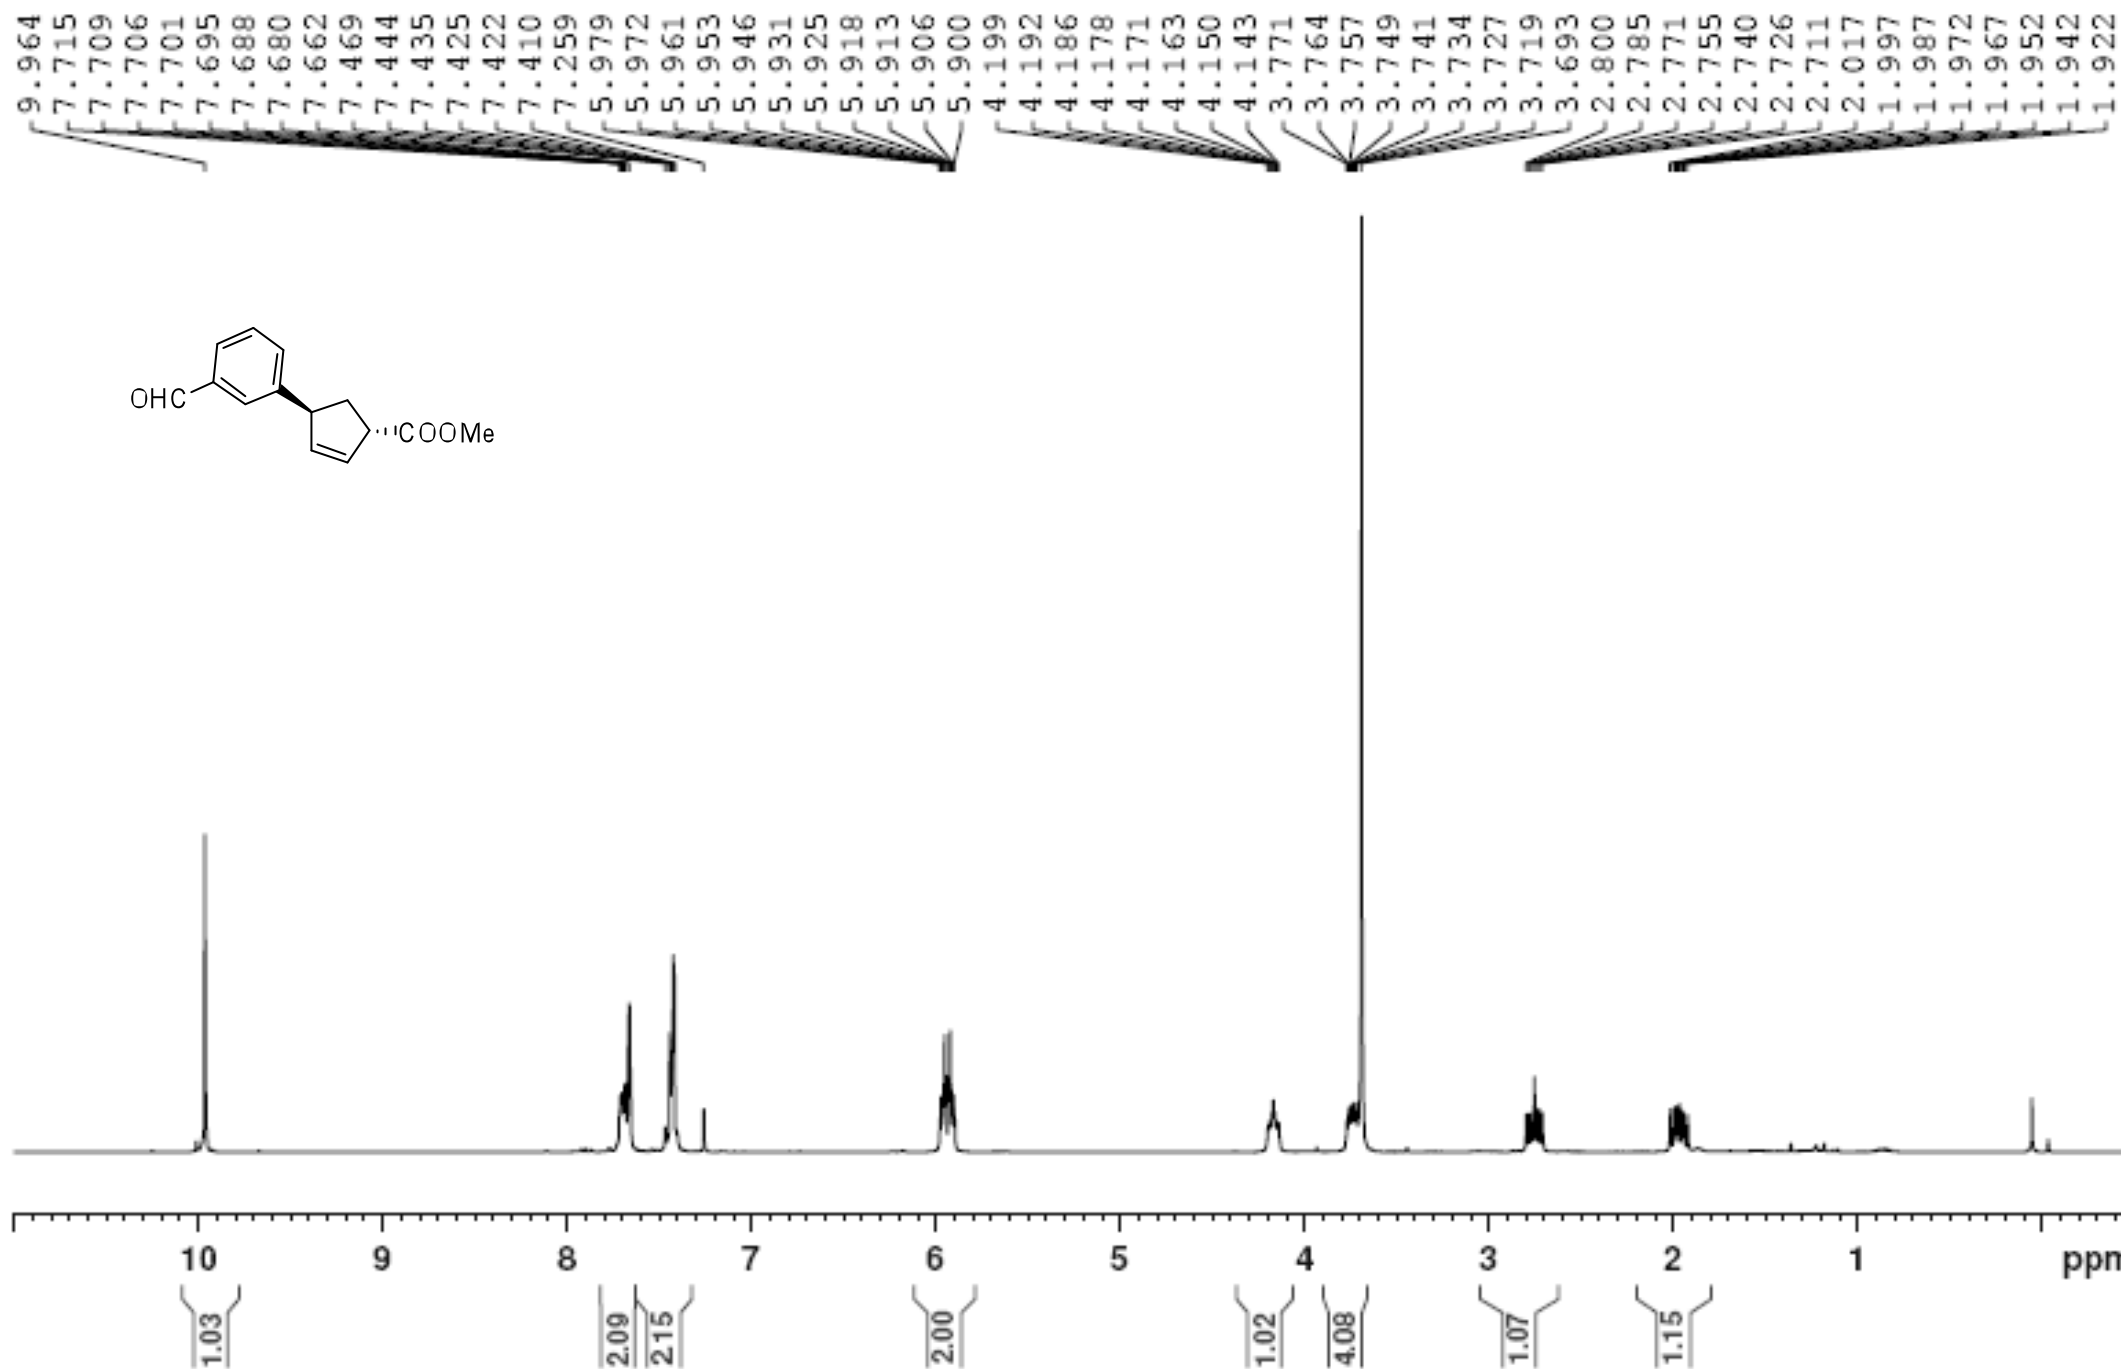

6062-6c AV300 CDC13 07 Dec 2012

S28

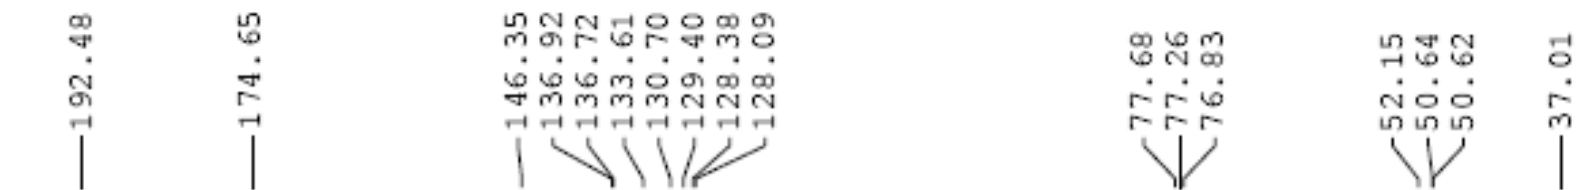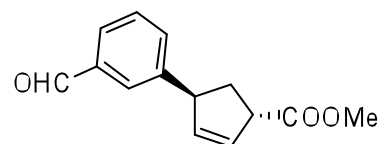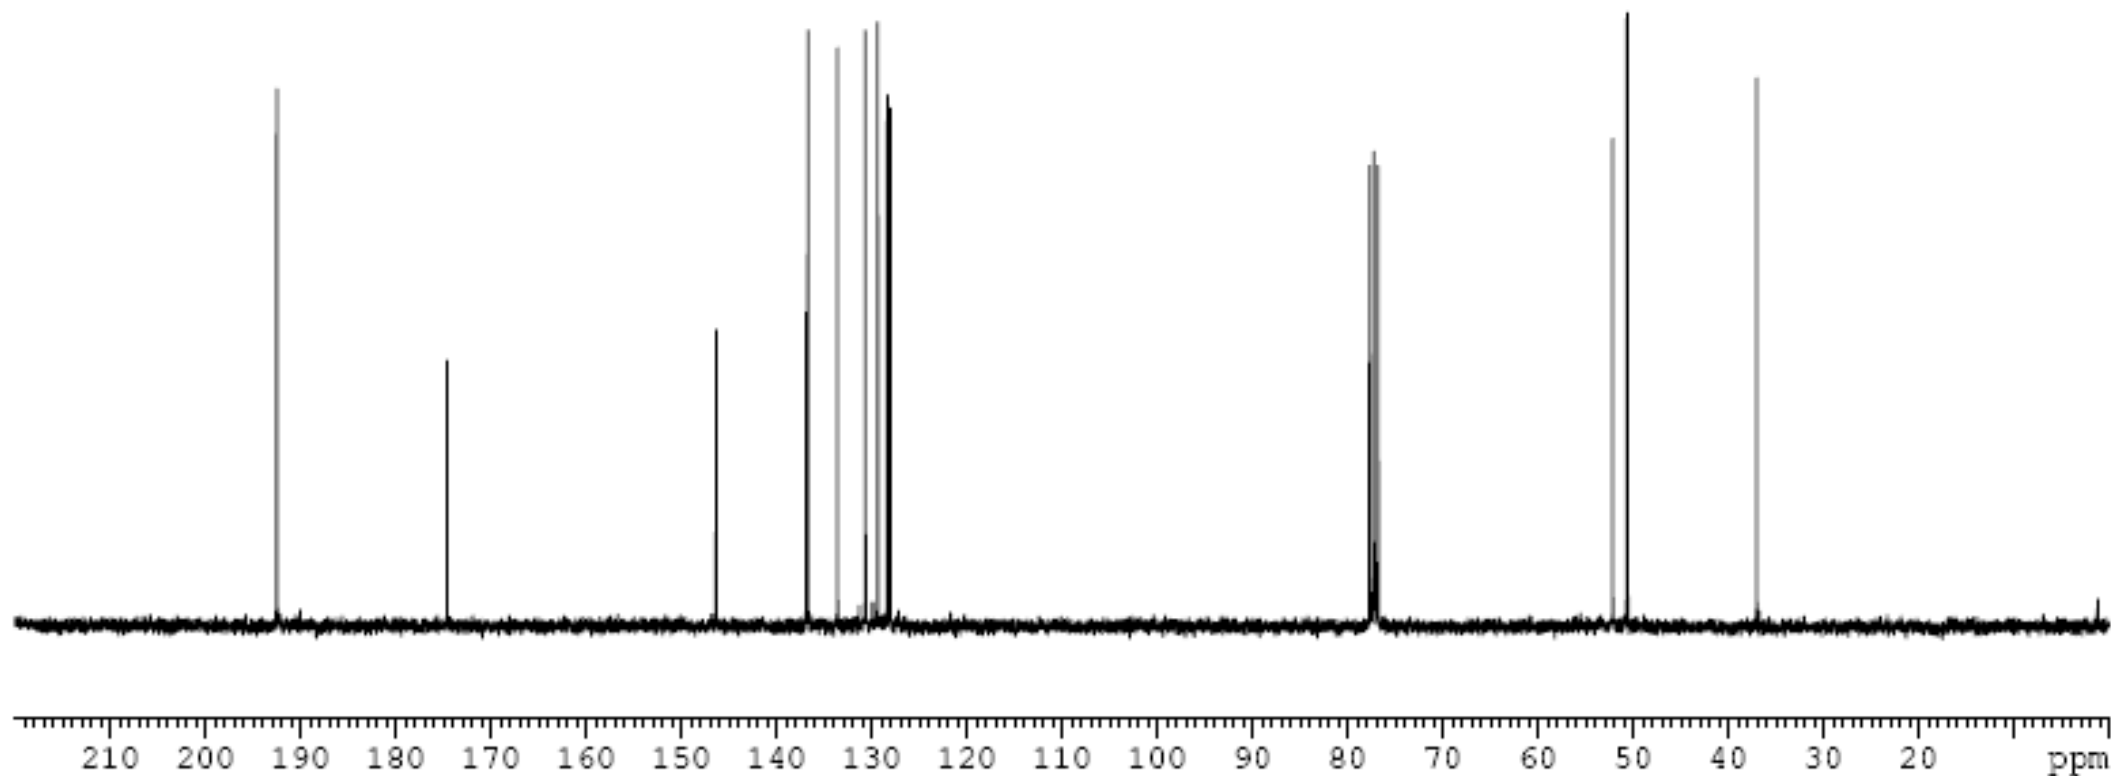

8.128  
8.101  
7.855  
7.830  
7.825  
7.721  
7.694  
7.539  
7.521  
7.516  
7.495  
7.488  
7.467  
7.464  
7.445  
7.400  
7.375  
7.349  
7.262  
7.239  
6.119  
6.108  
6.100  
6.093  
6.058  
6.051  
6.043  
6.032  
4.854  
4.845  
4.836  
3.724  
2.981  
2.964  
2.951  
2.936  
2.920  
2.906  
2.890  
2.092  
2.073  
2.062  
2.047  
2.043  
2.029  
2.018  
1.999

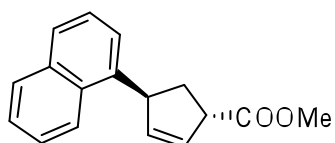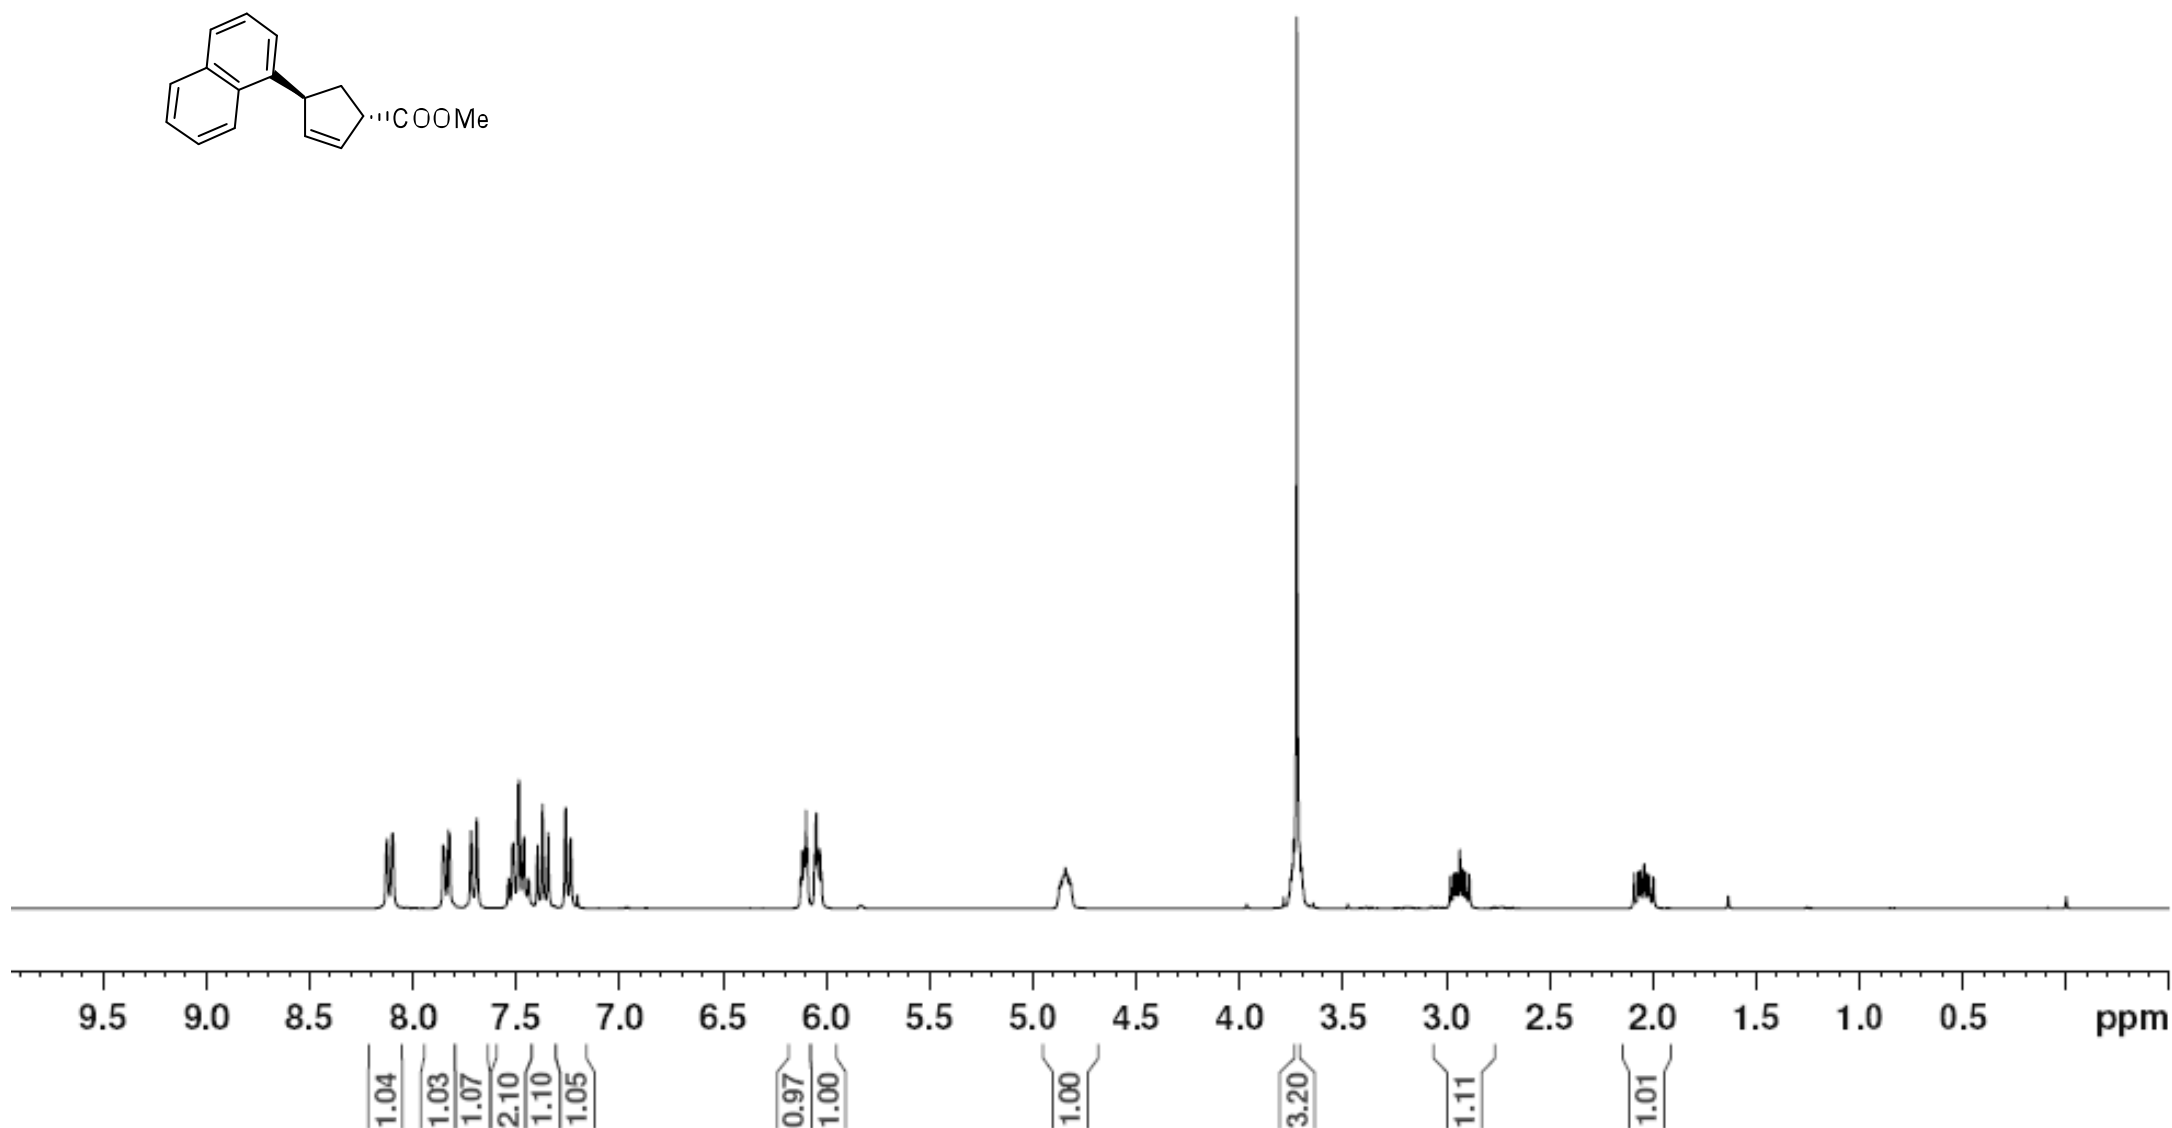

6062-7c AV300 CDCl<sub>3</sub> 08 Dec 2012

S30

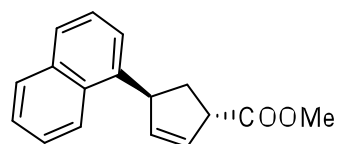

— 175.08

141.11  
136.82  
134.18  
131.85  
130.50  
128.98  
127.21  
126.15  
125.76  
125.71  
123.89  
123.02

77.68  
77.25  
76.83

52.17  
50.56  
46.65

— 36.44

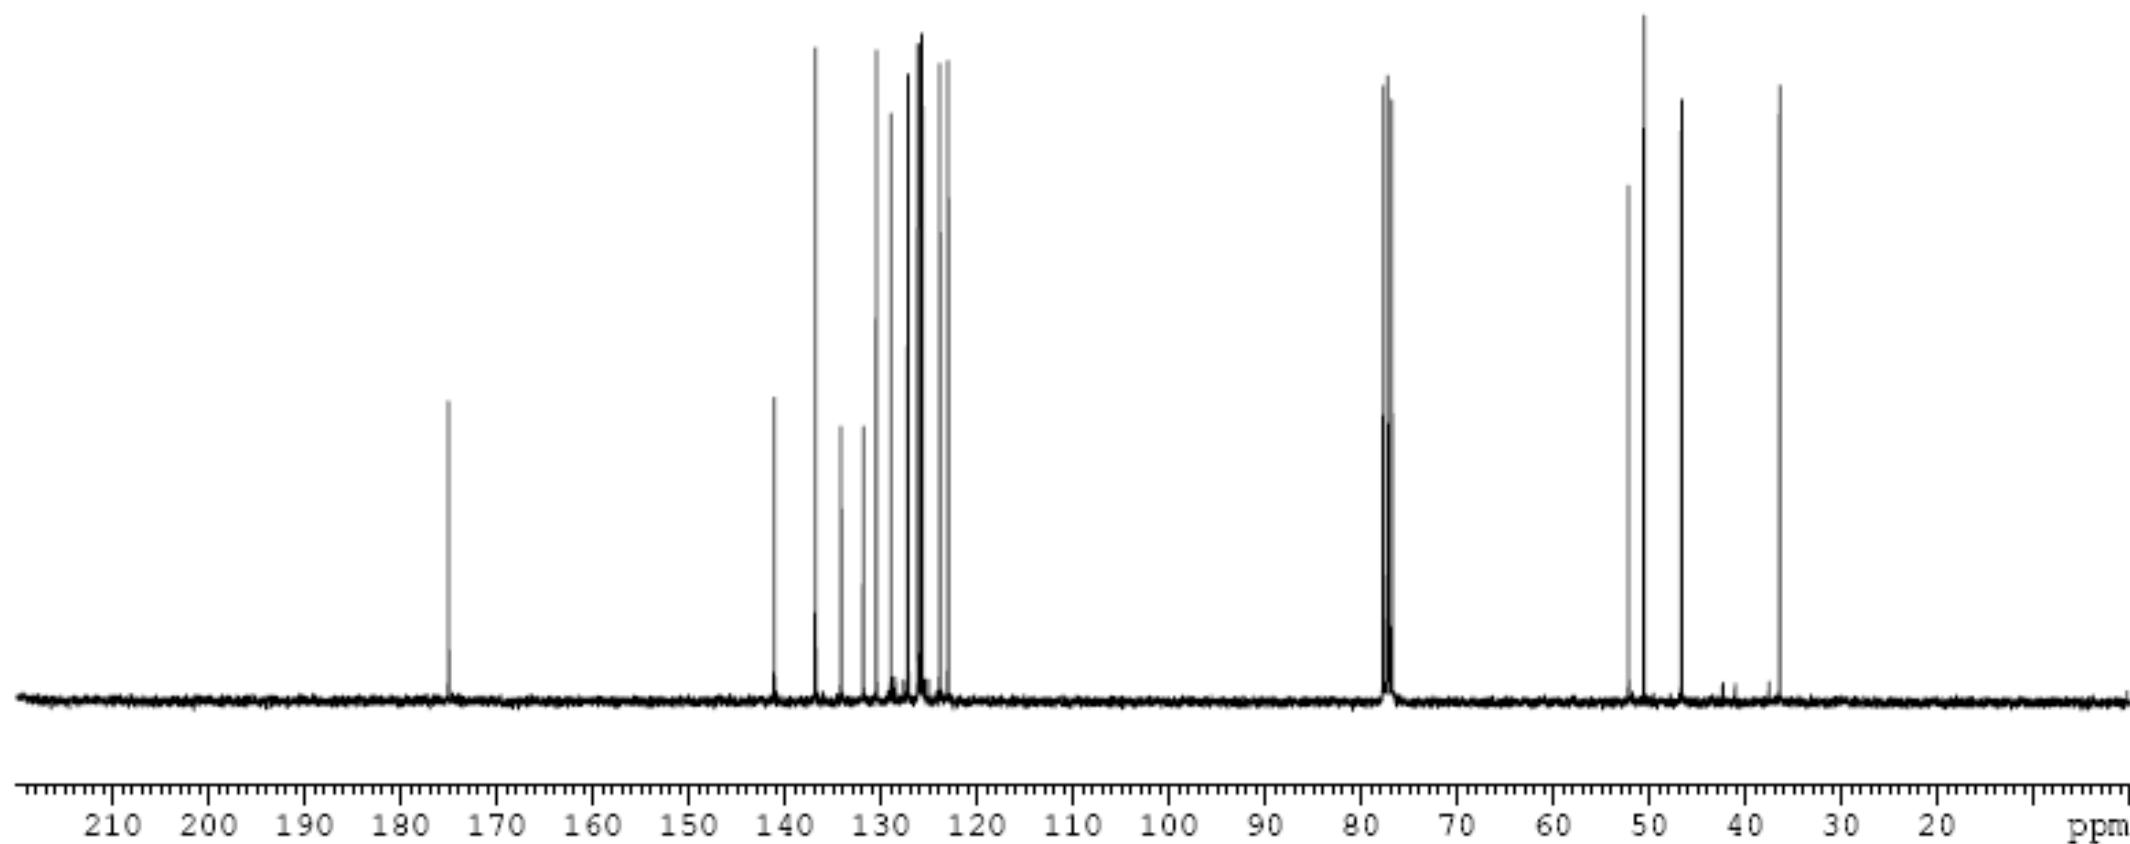

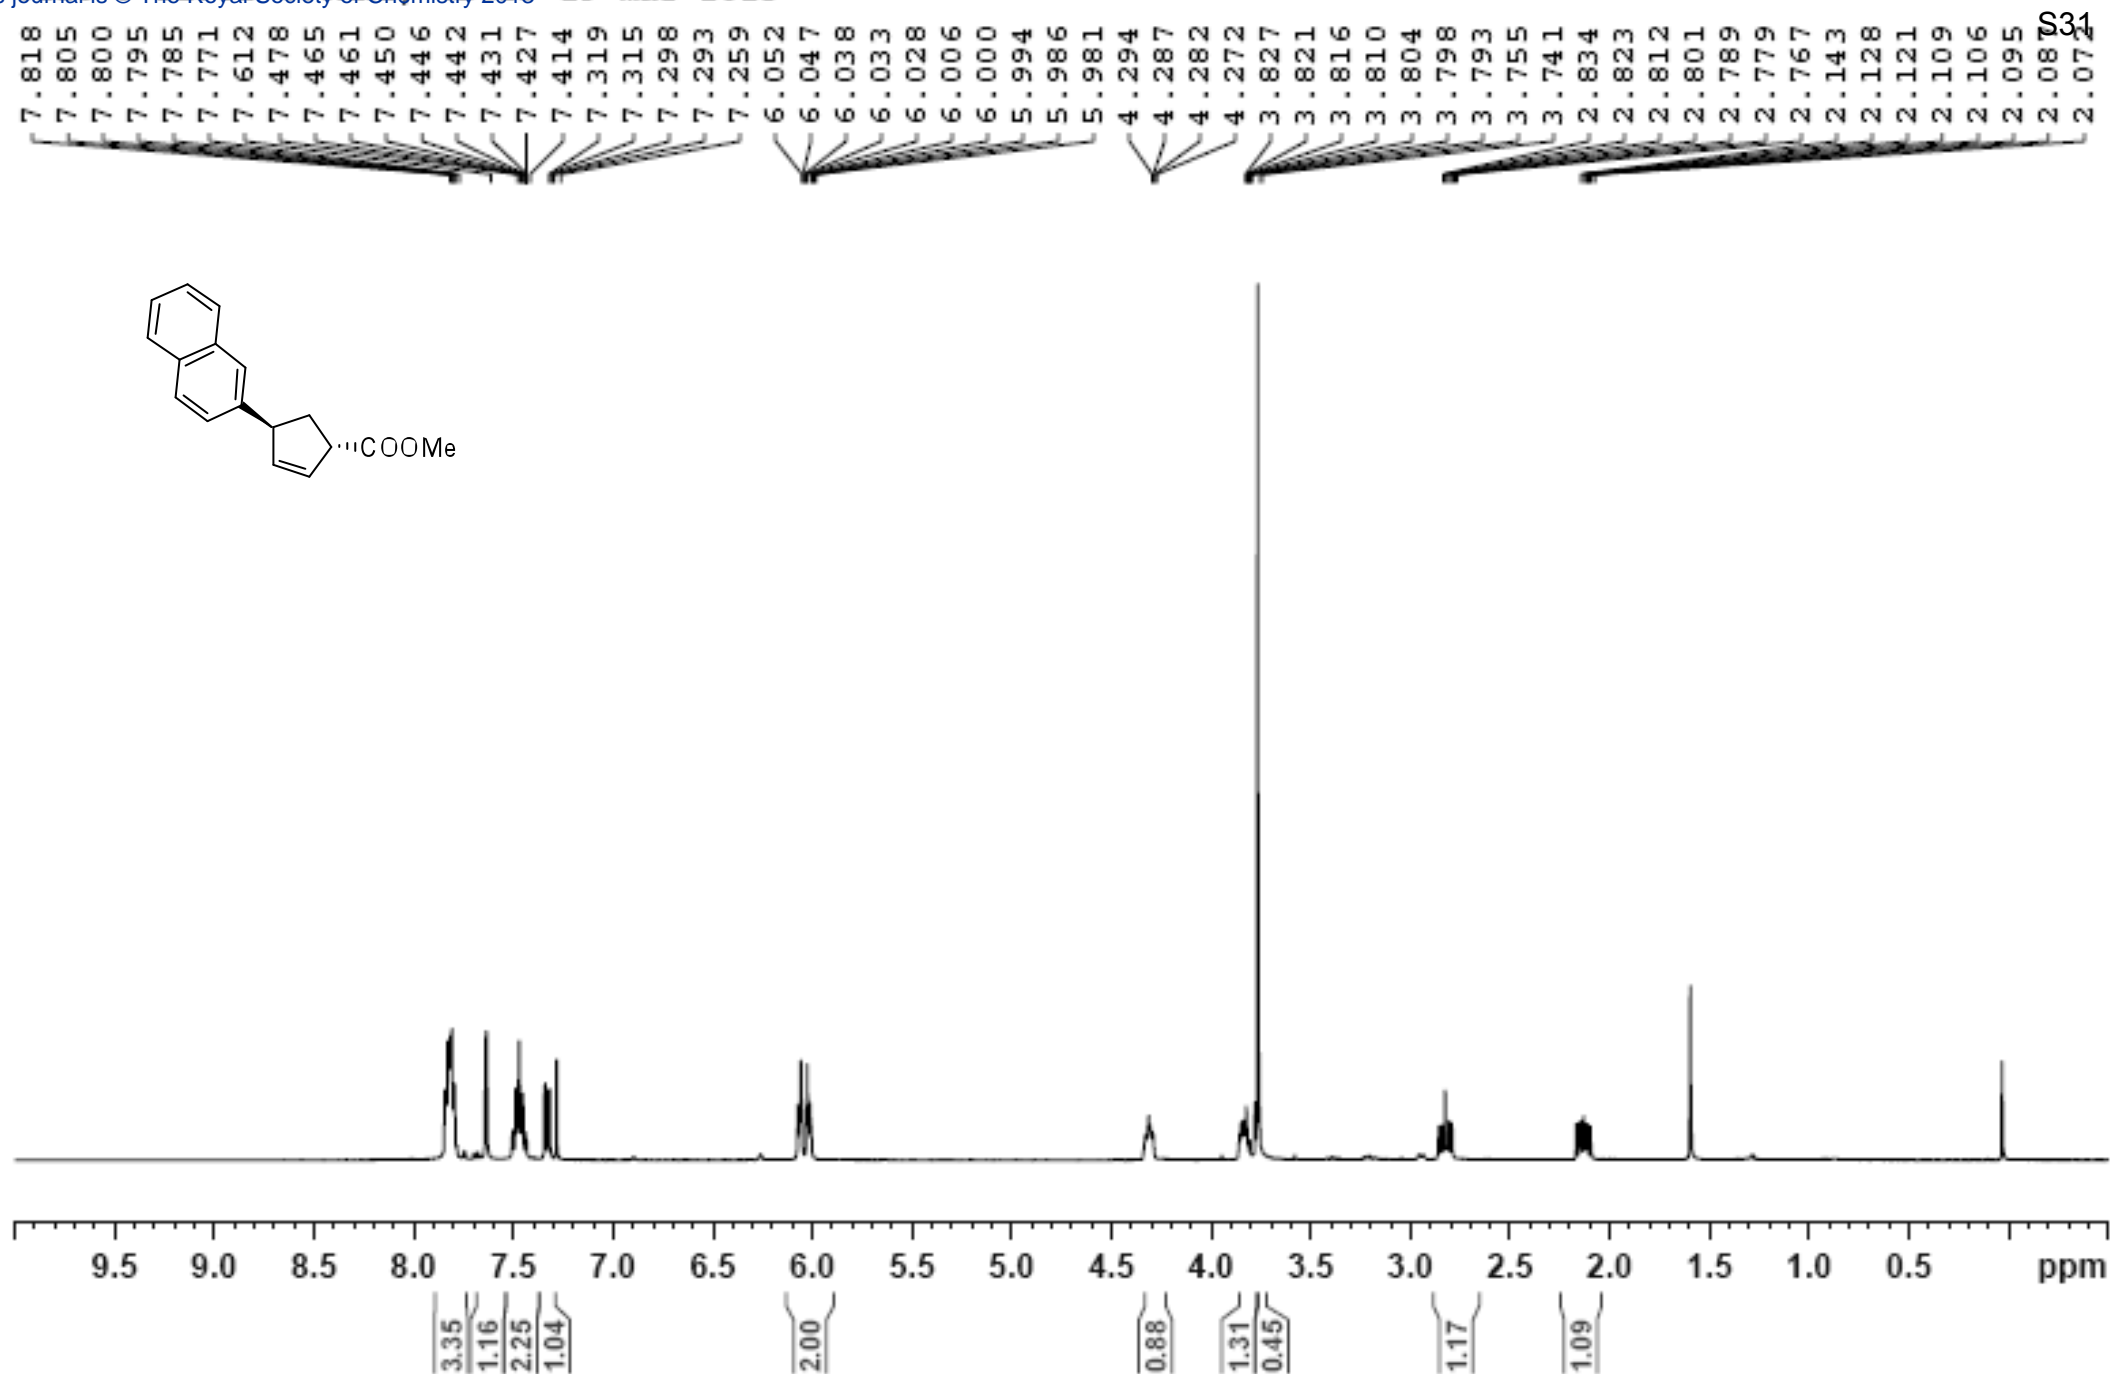

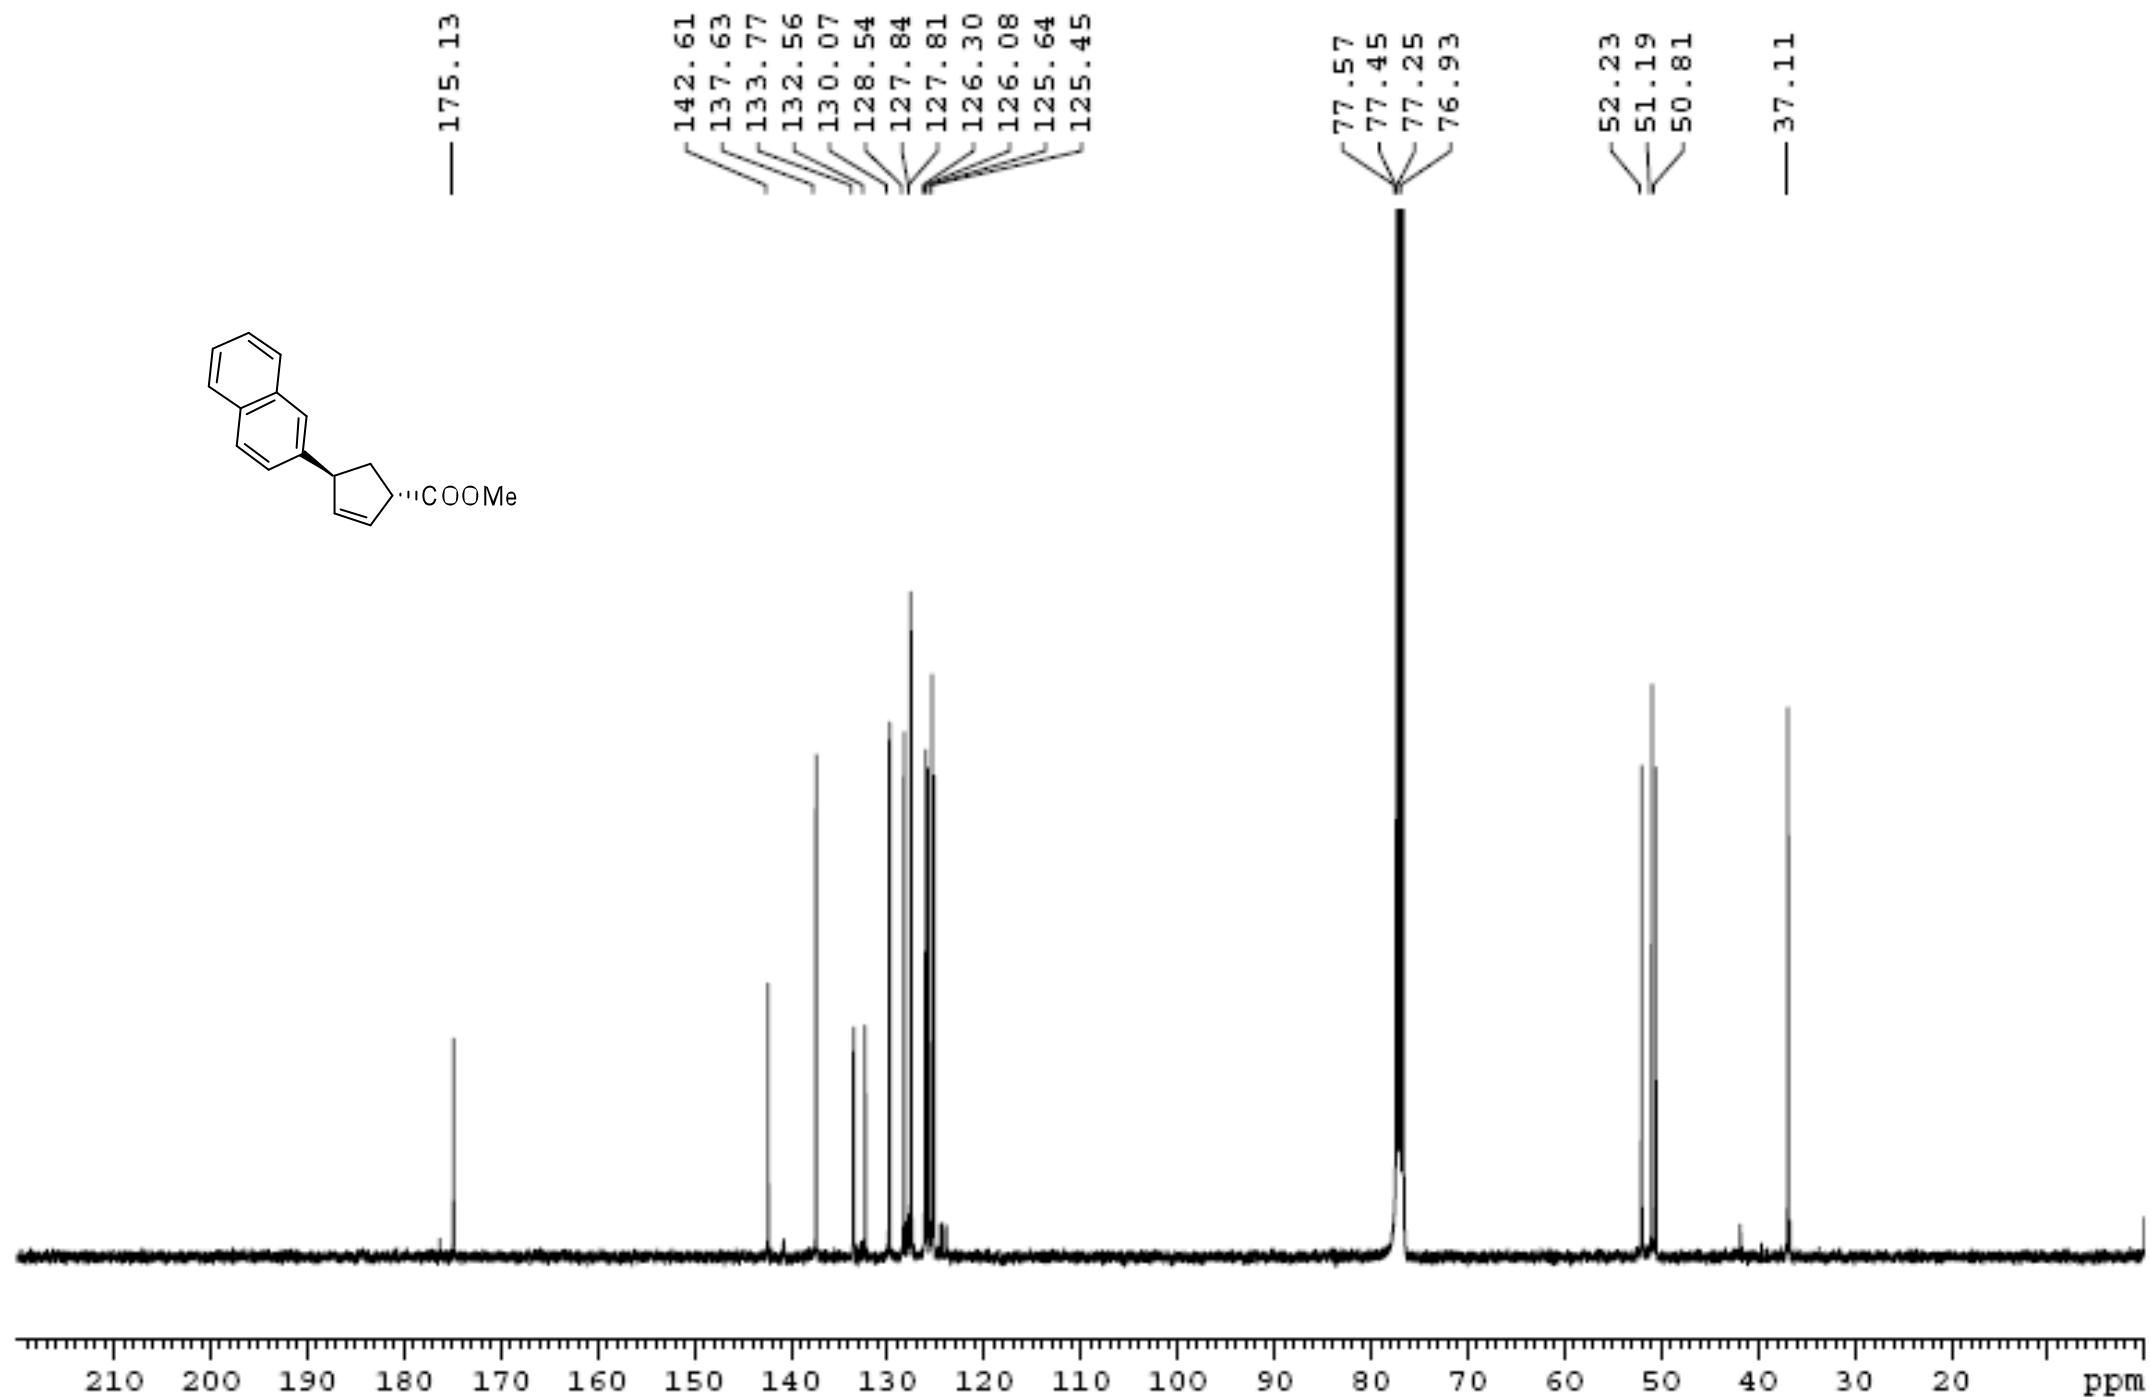



7.260  
7.172  
7.167  
7.162  
7.149  
7.133  
7.129  
7.119  
7.114  
7.085  
7.079  
7.066  
— 5.959

4.329  
4.323  
4.315  
4.308  
4.301  
4.292  
4.286  
— 3.724  
2.795  
2.783  
2.772  
2.761  
2.750  
2.739  
2.727  
— 2.370  
1.939  
1.924  
1.916  
1.906  
1.901  
1.891  
1.883  
1.868

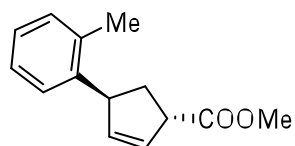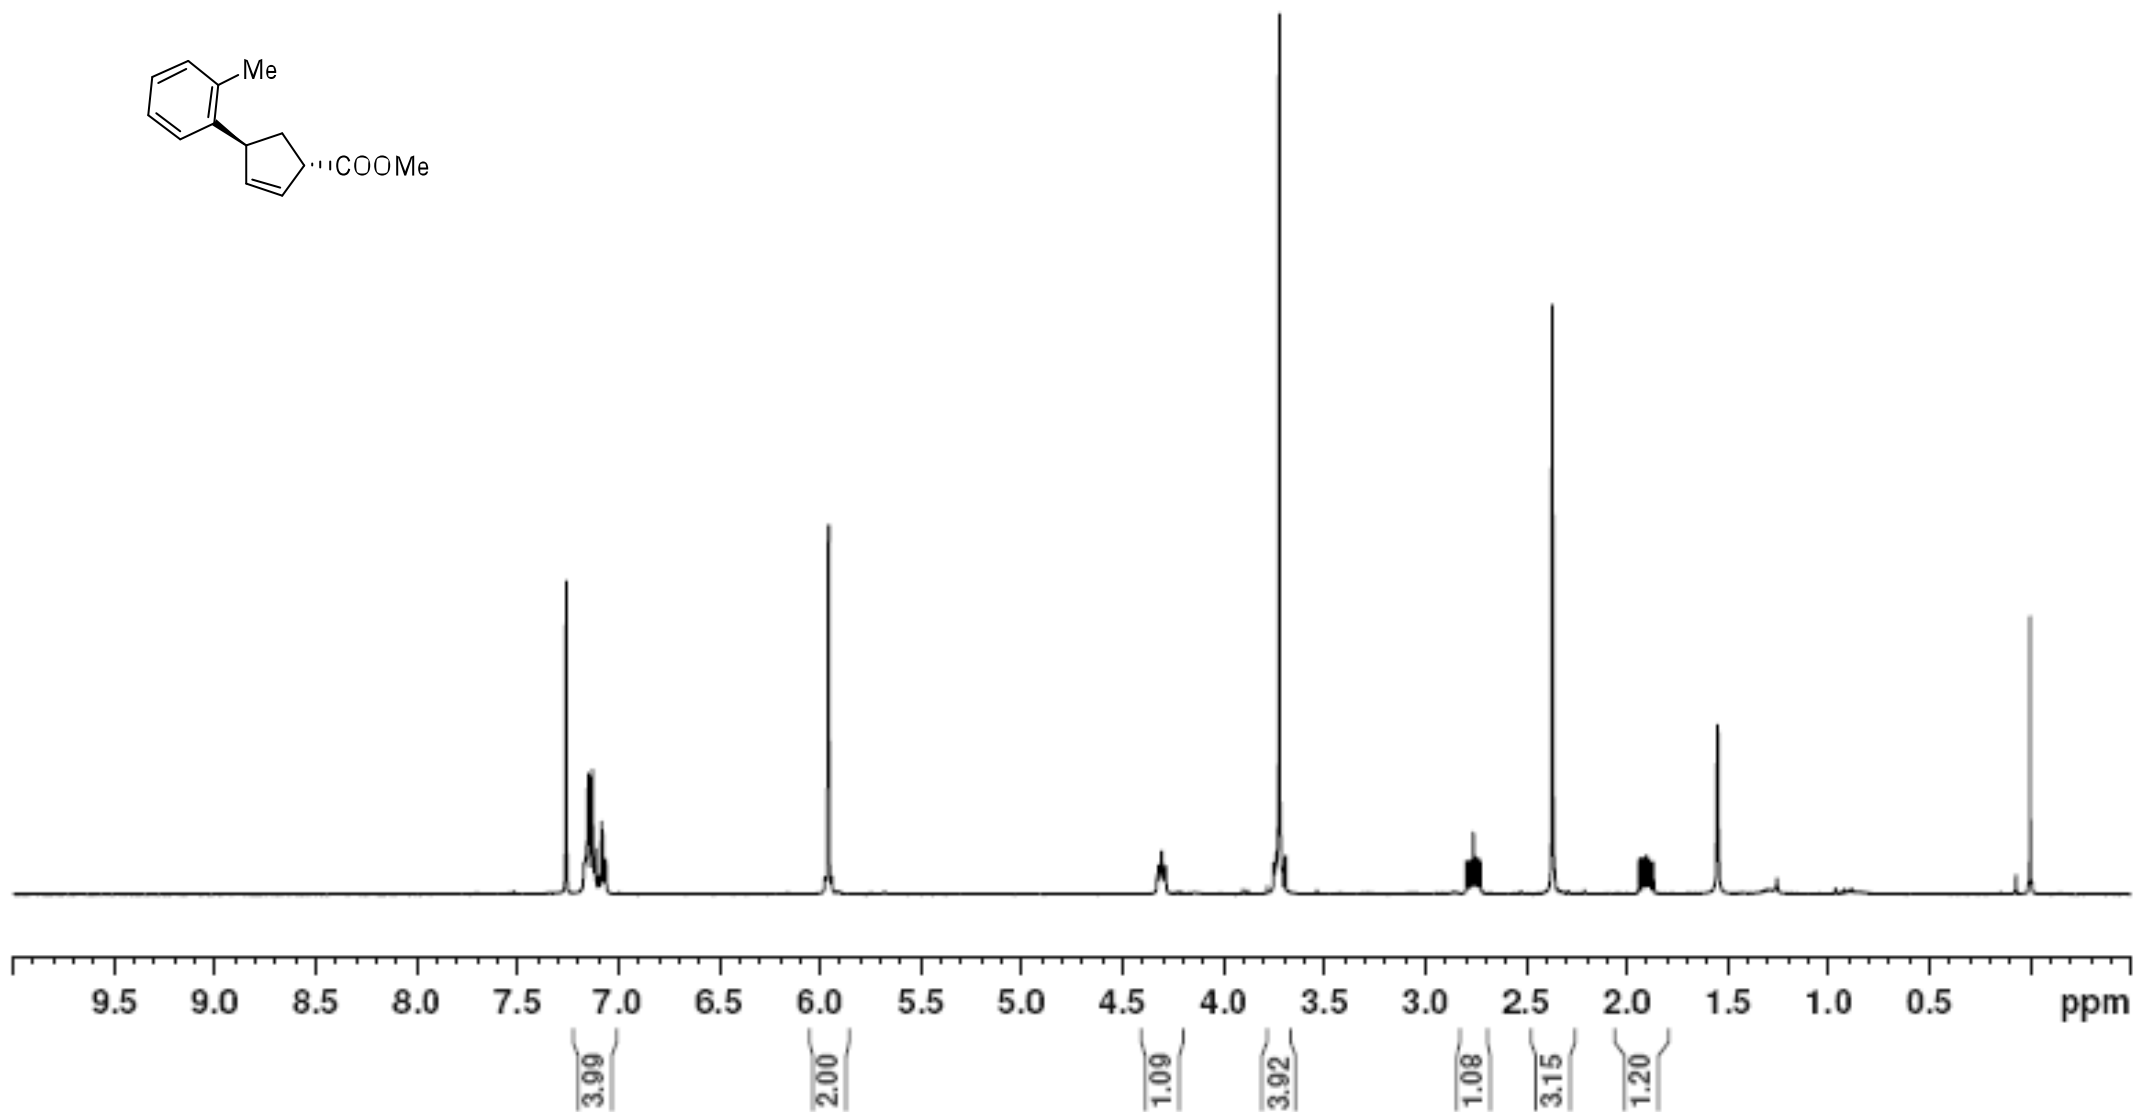

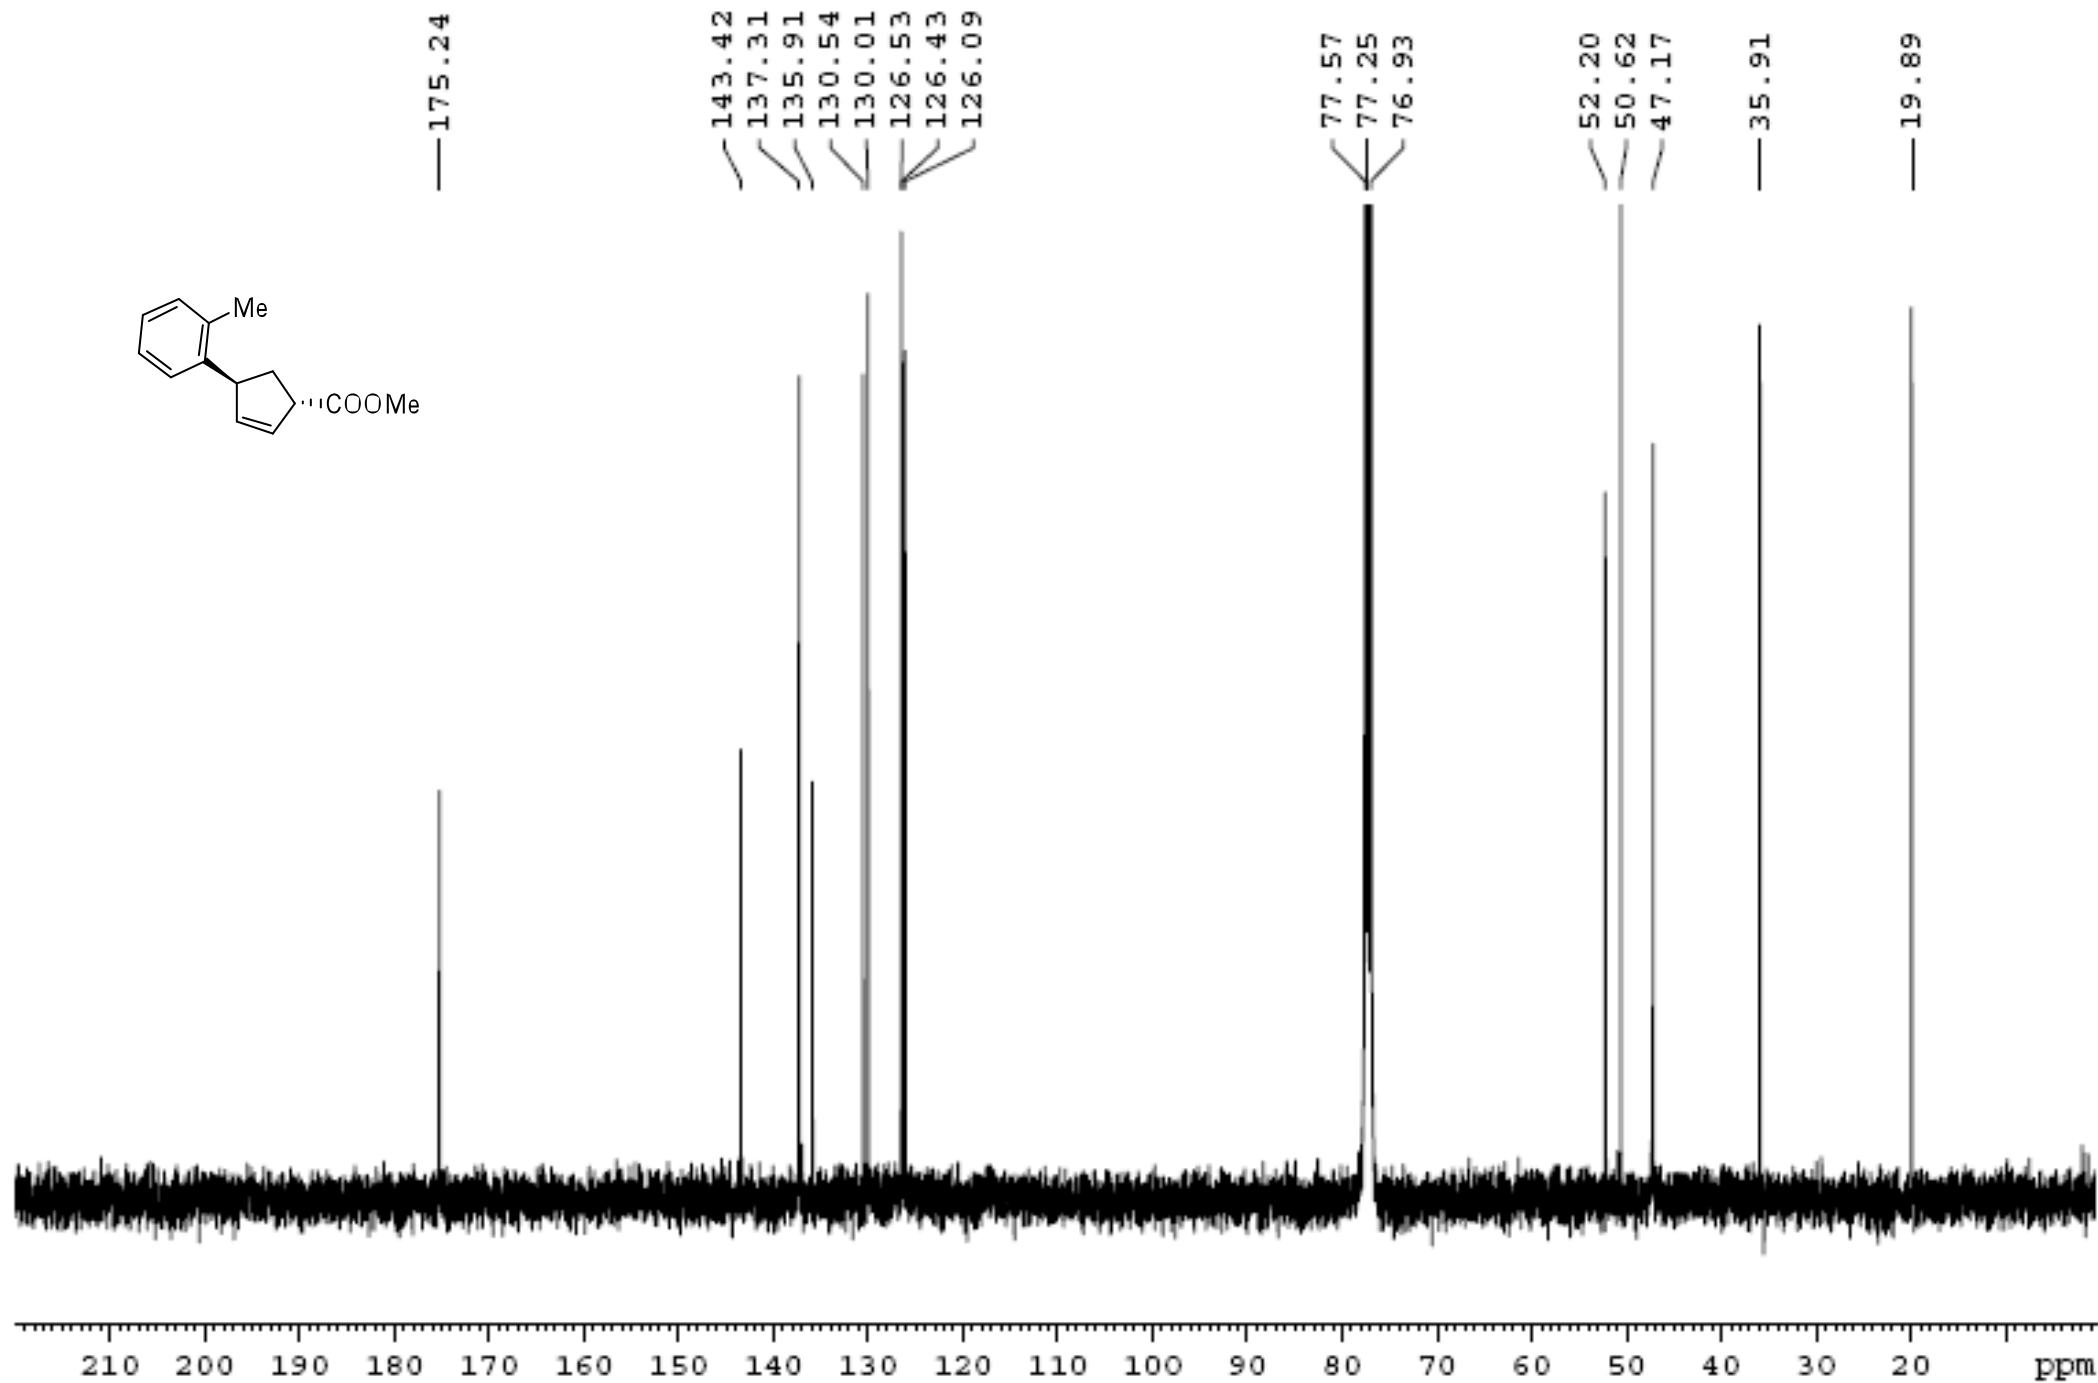

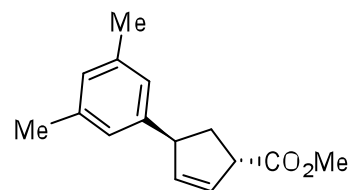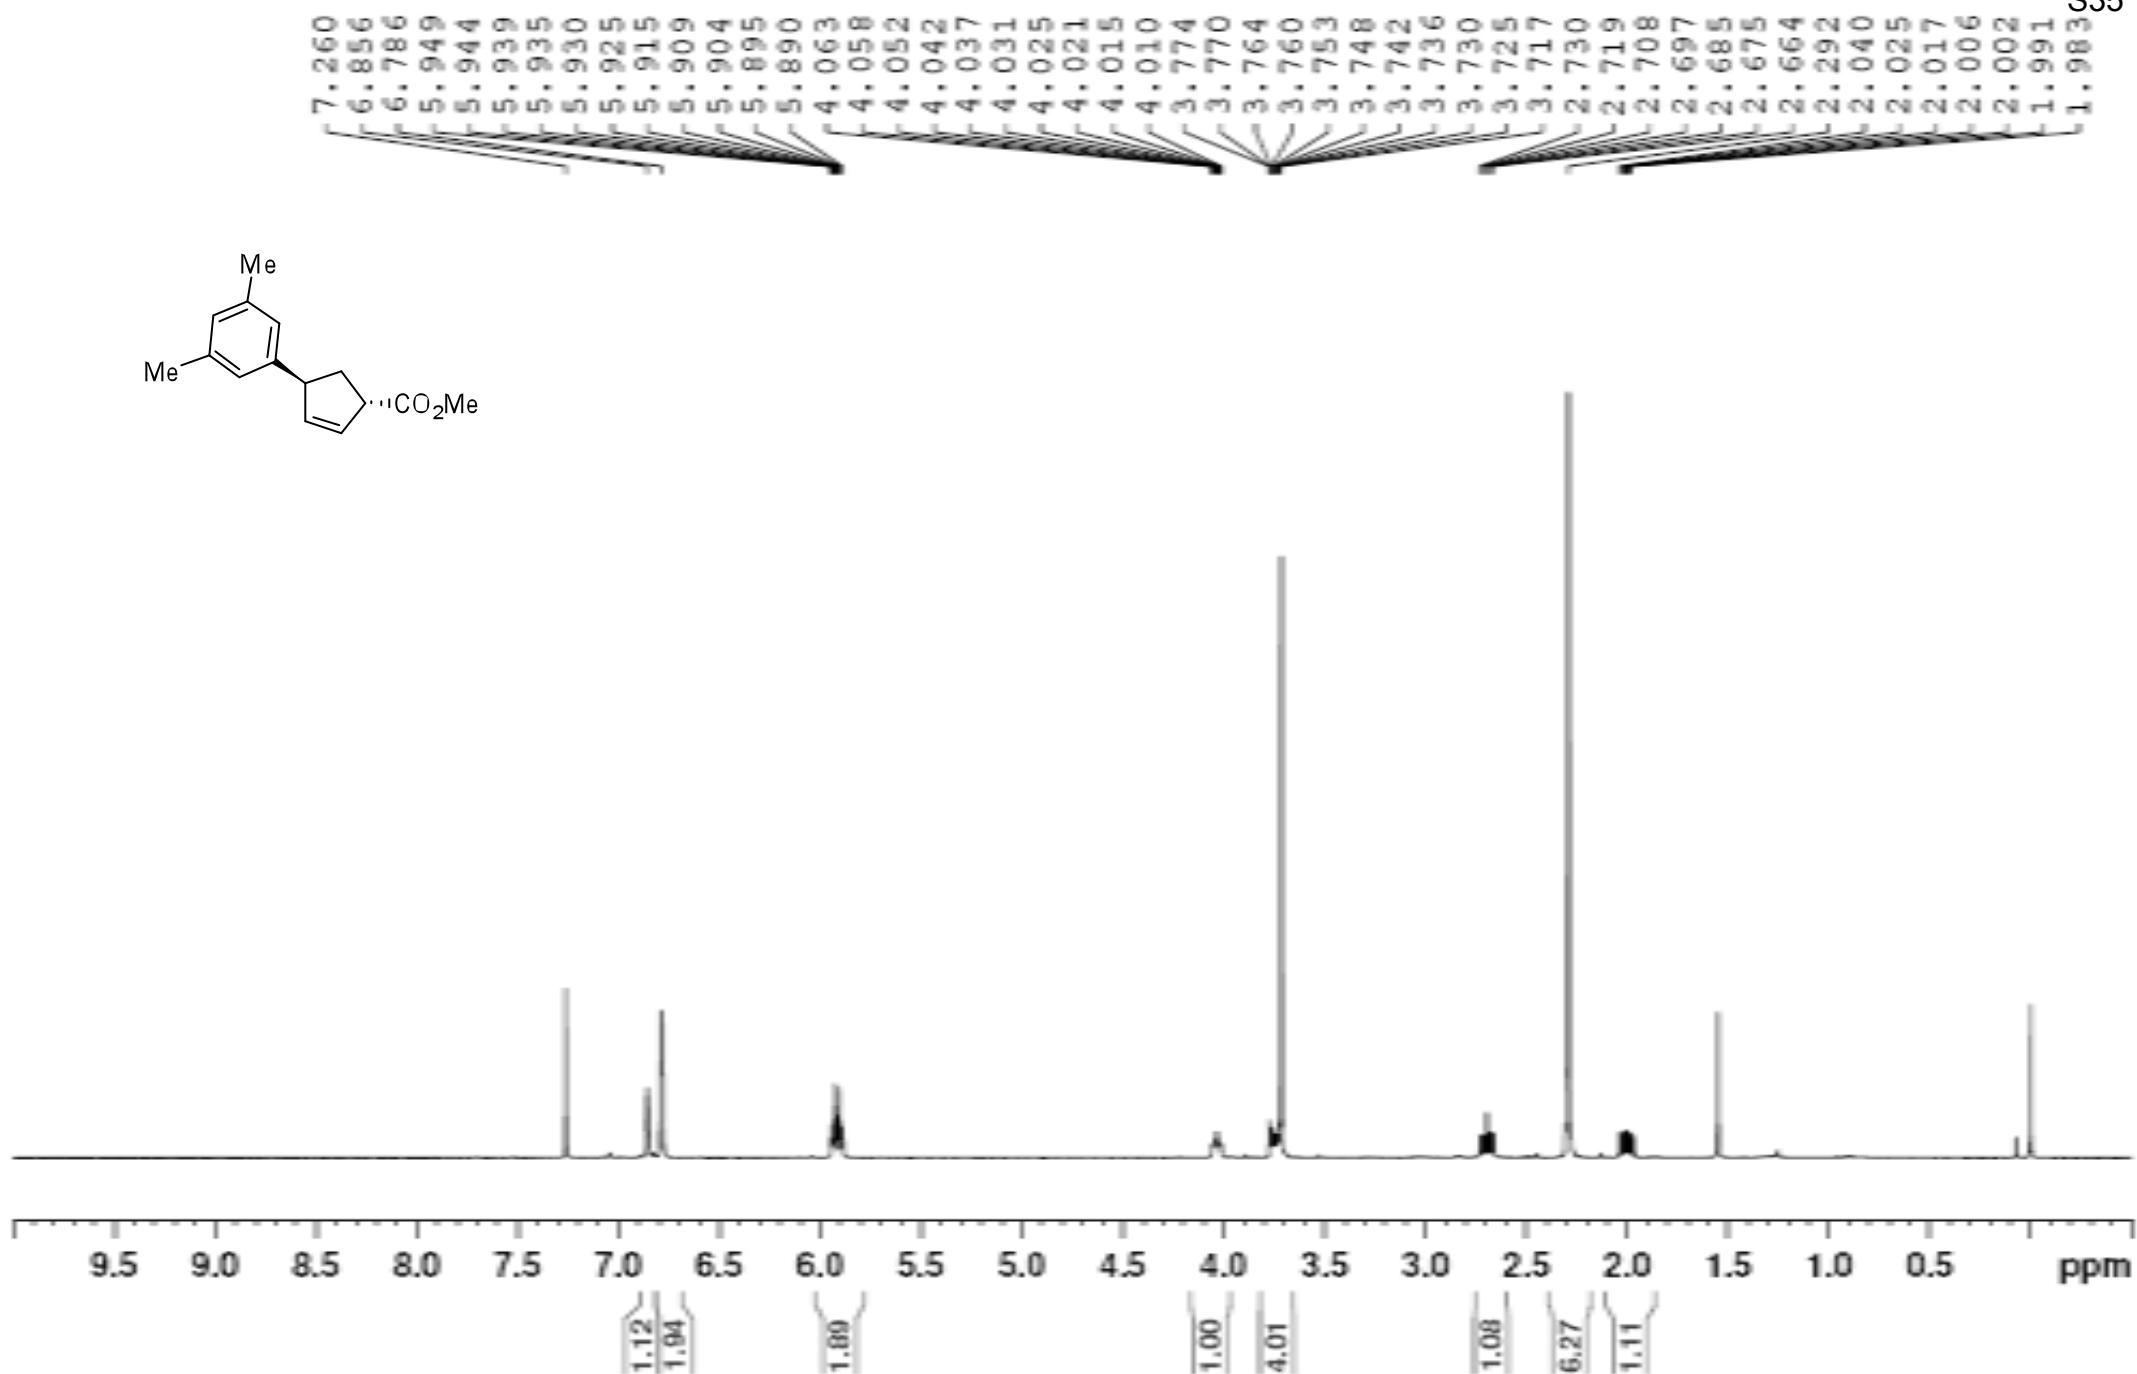

6095-2c BBFO1 12 Feb 2013

S36

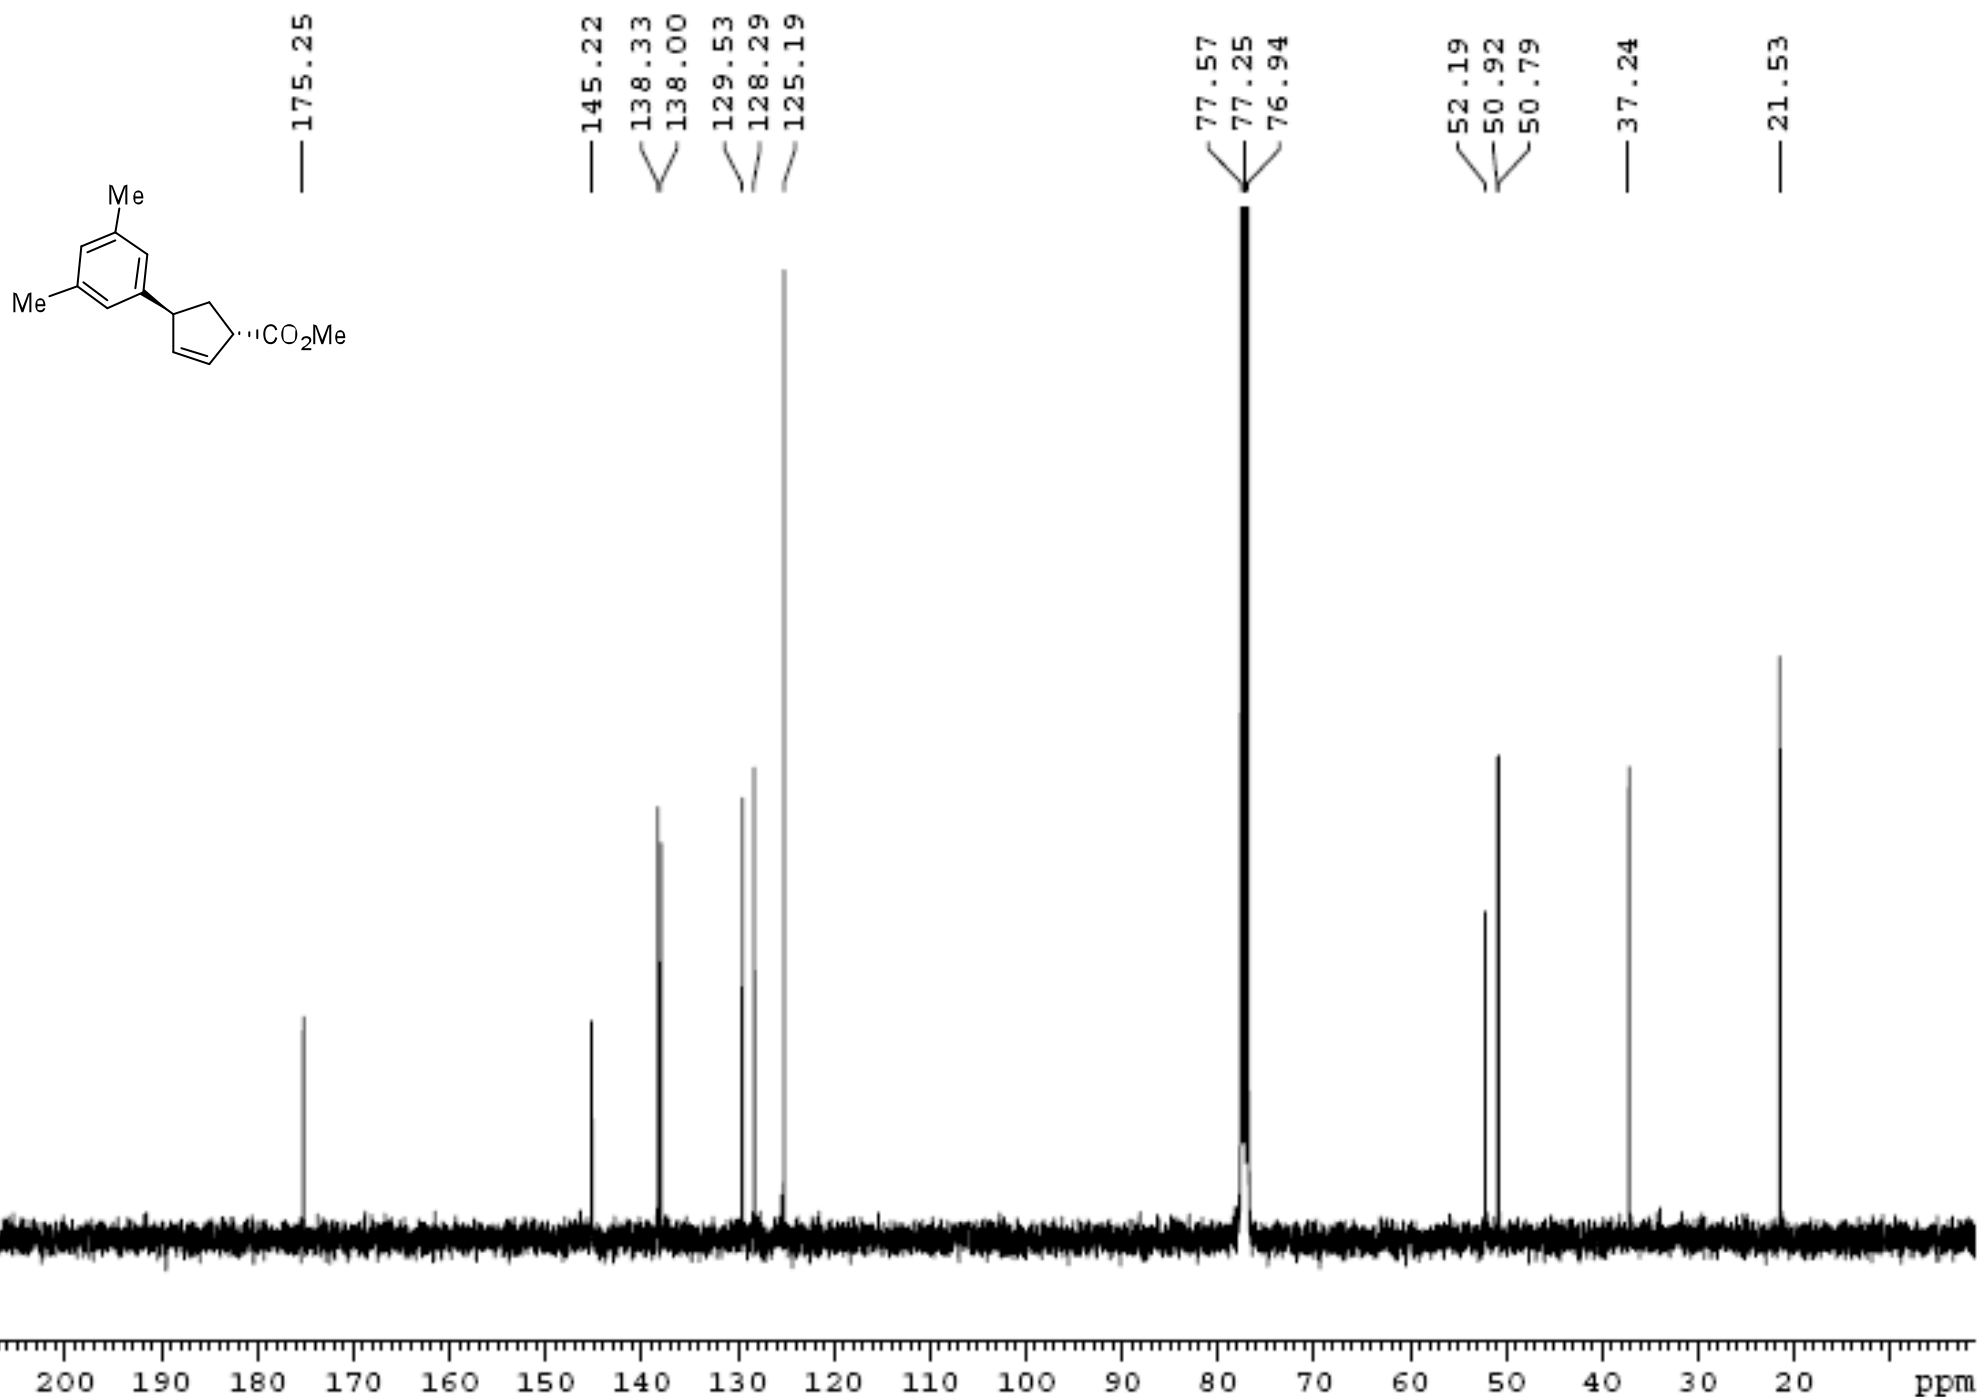

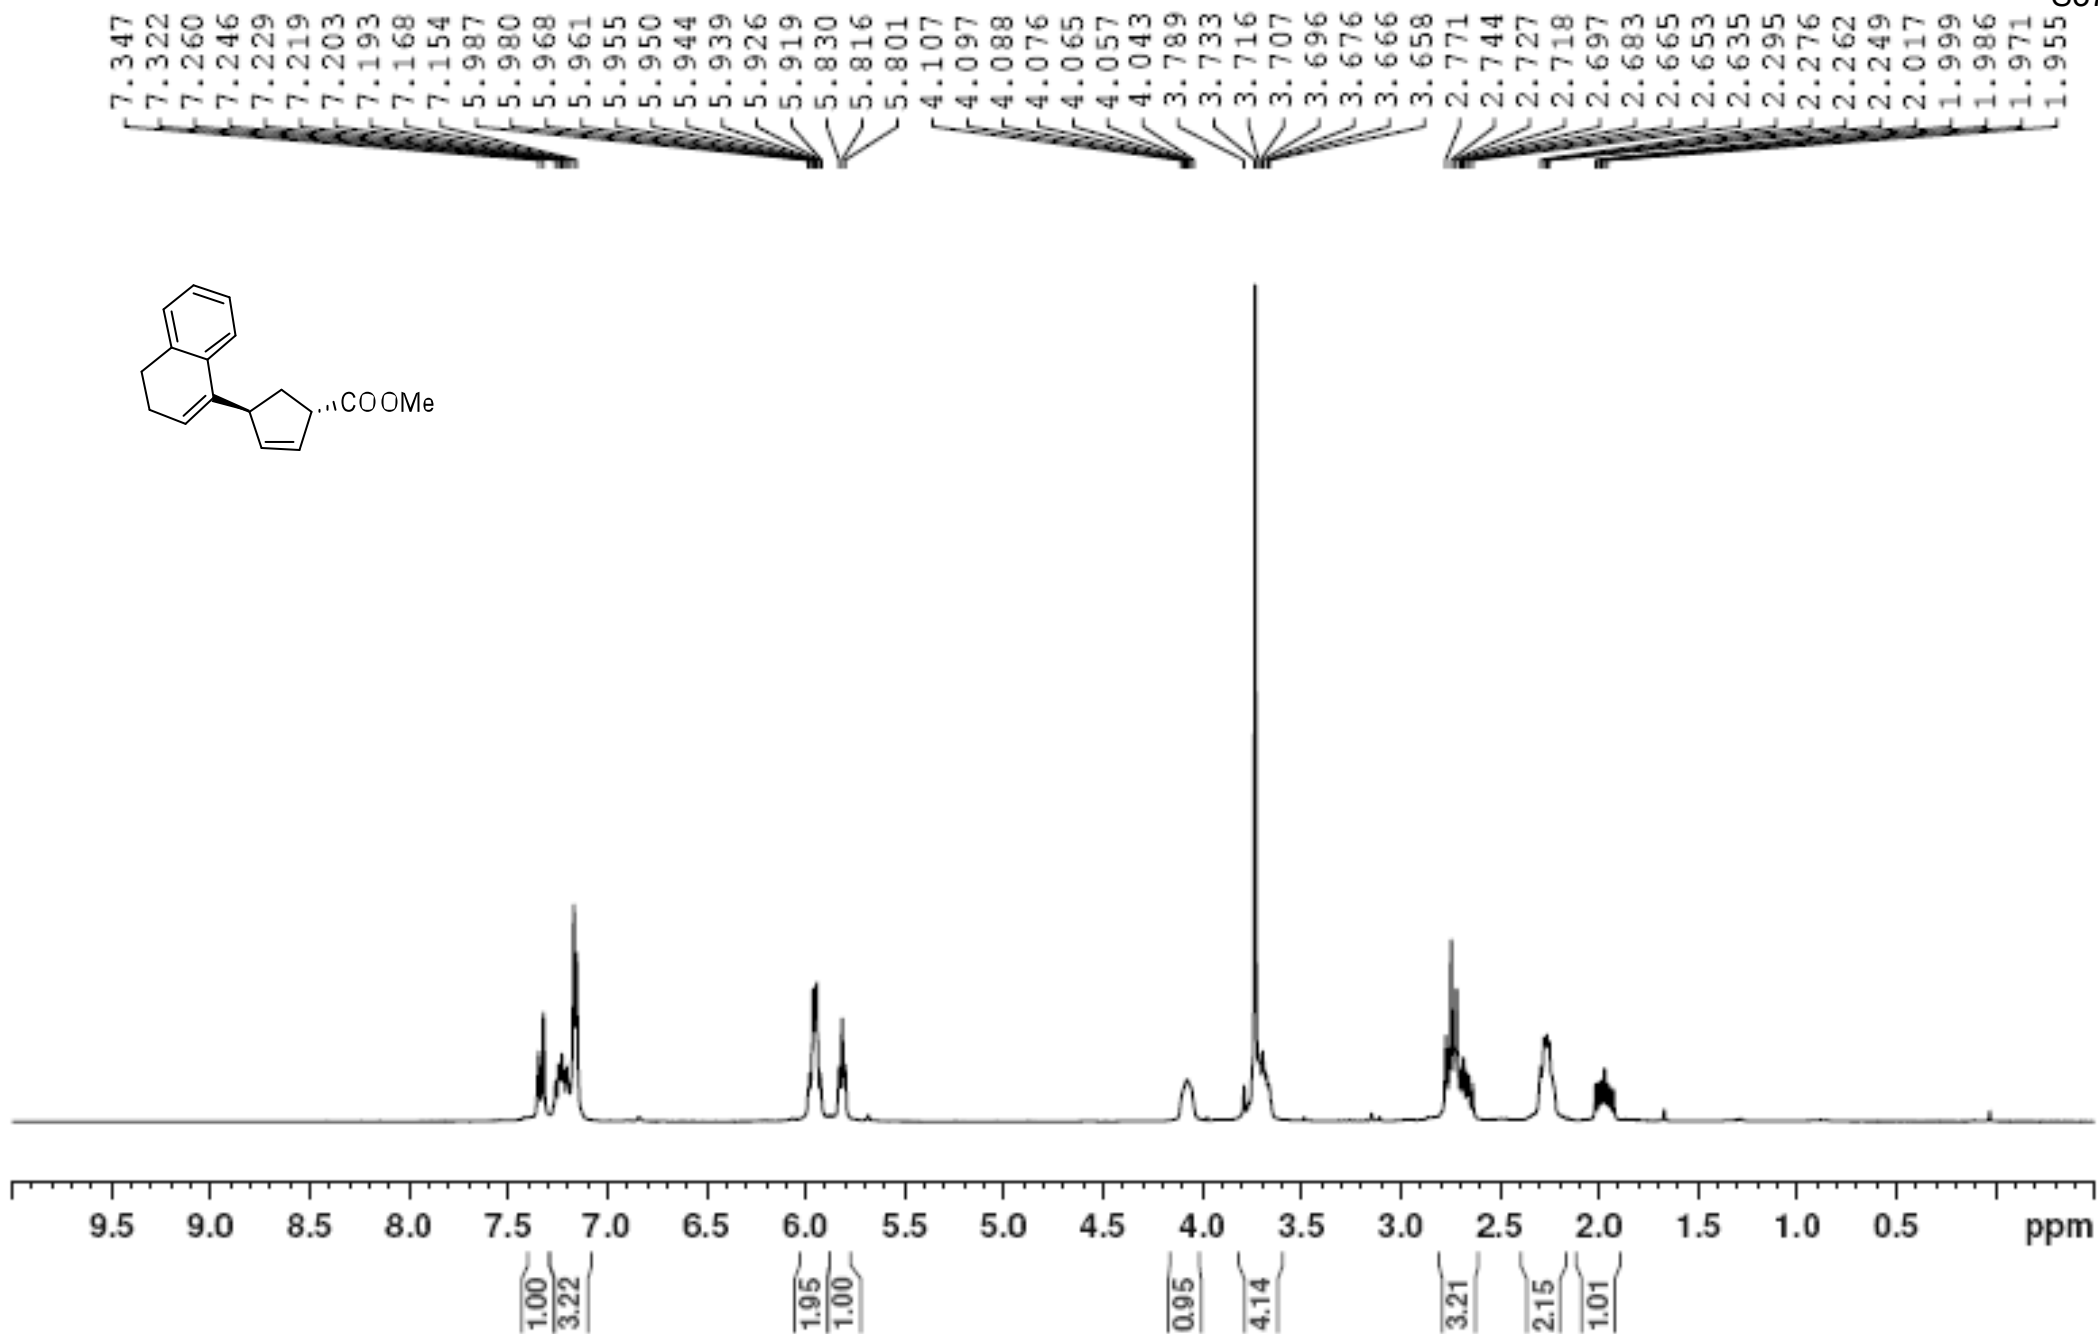

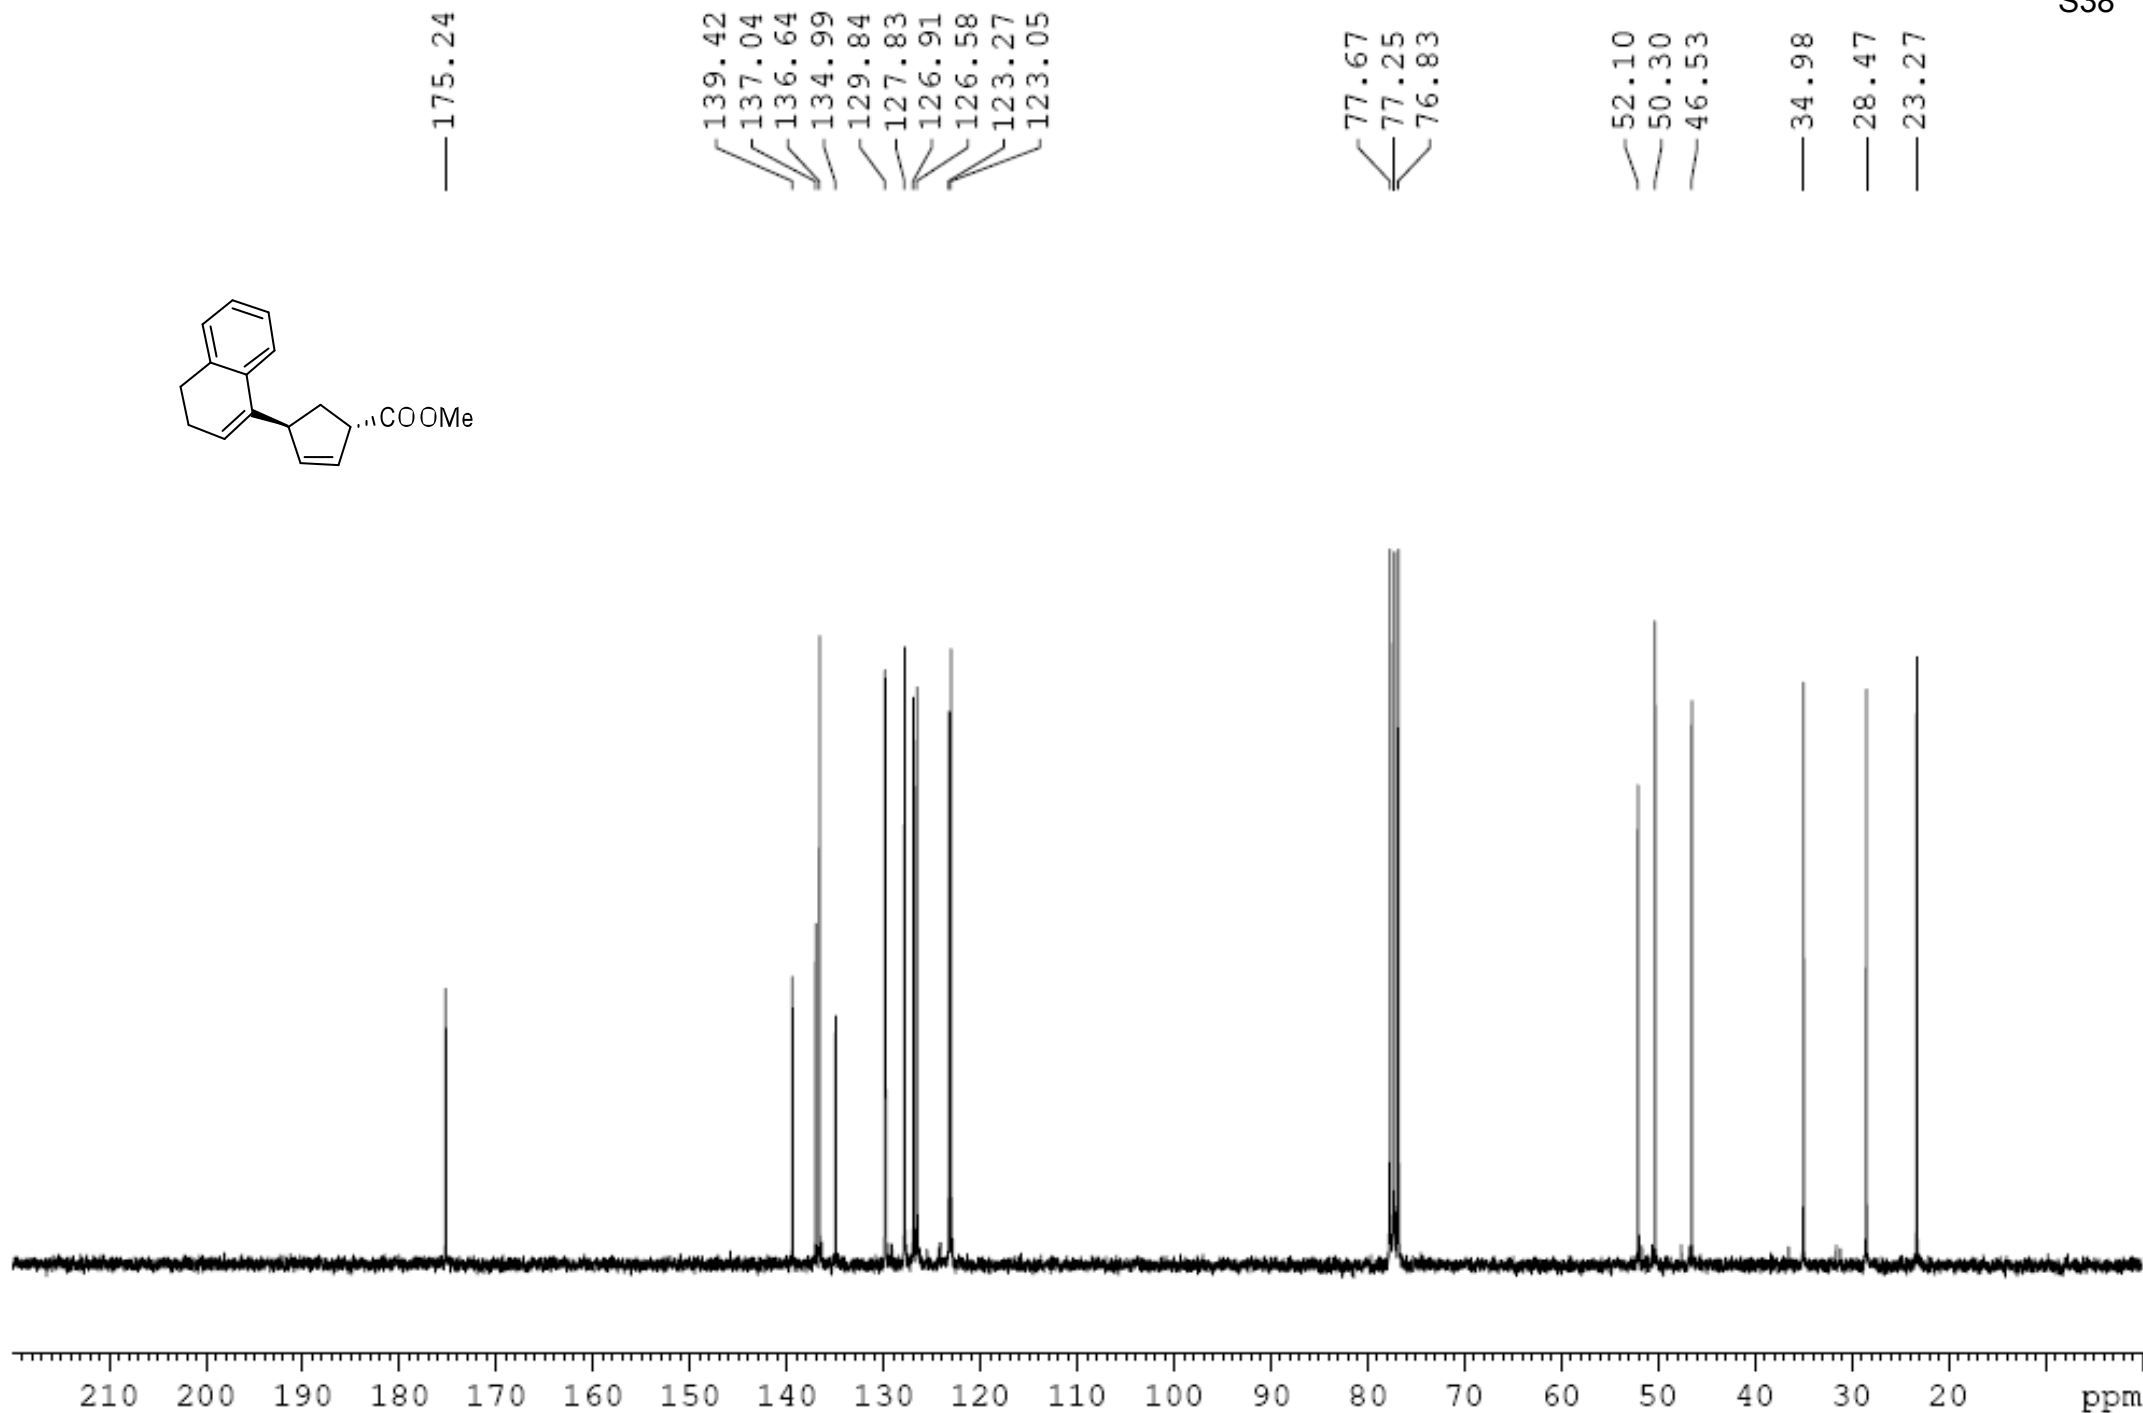

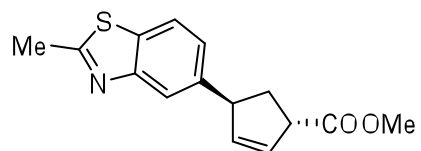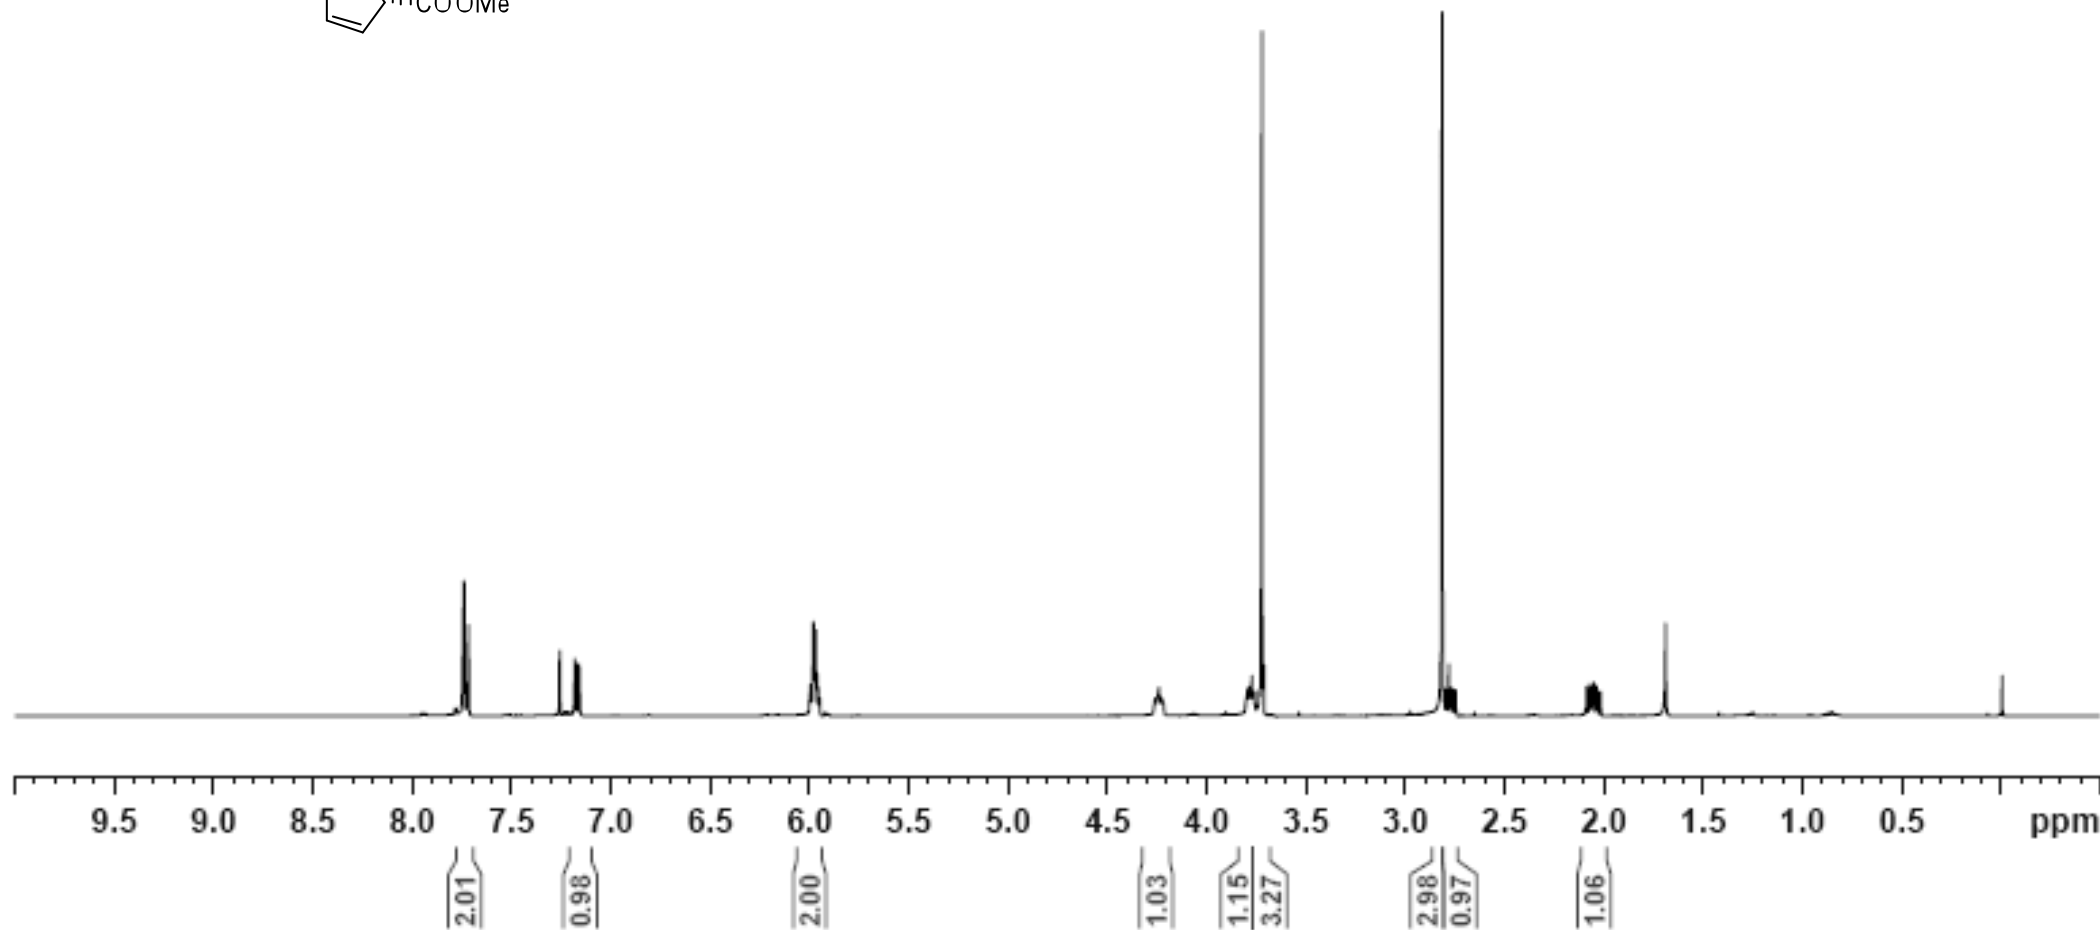

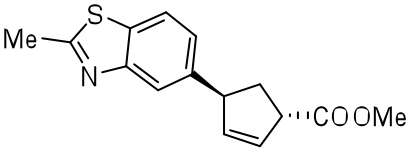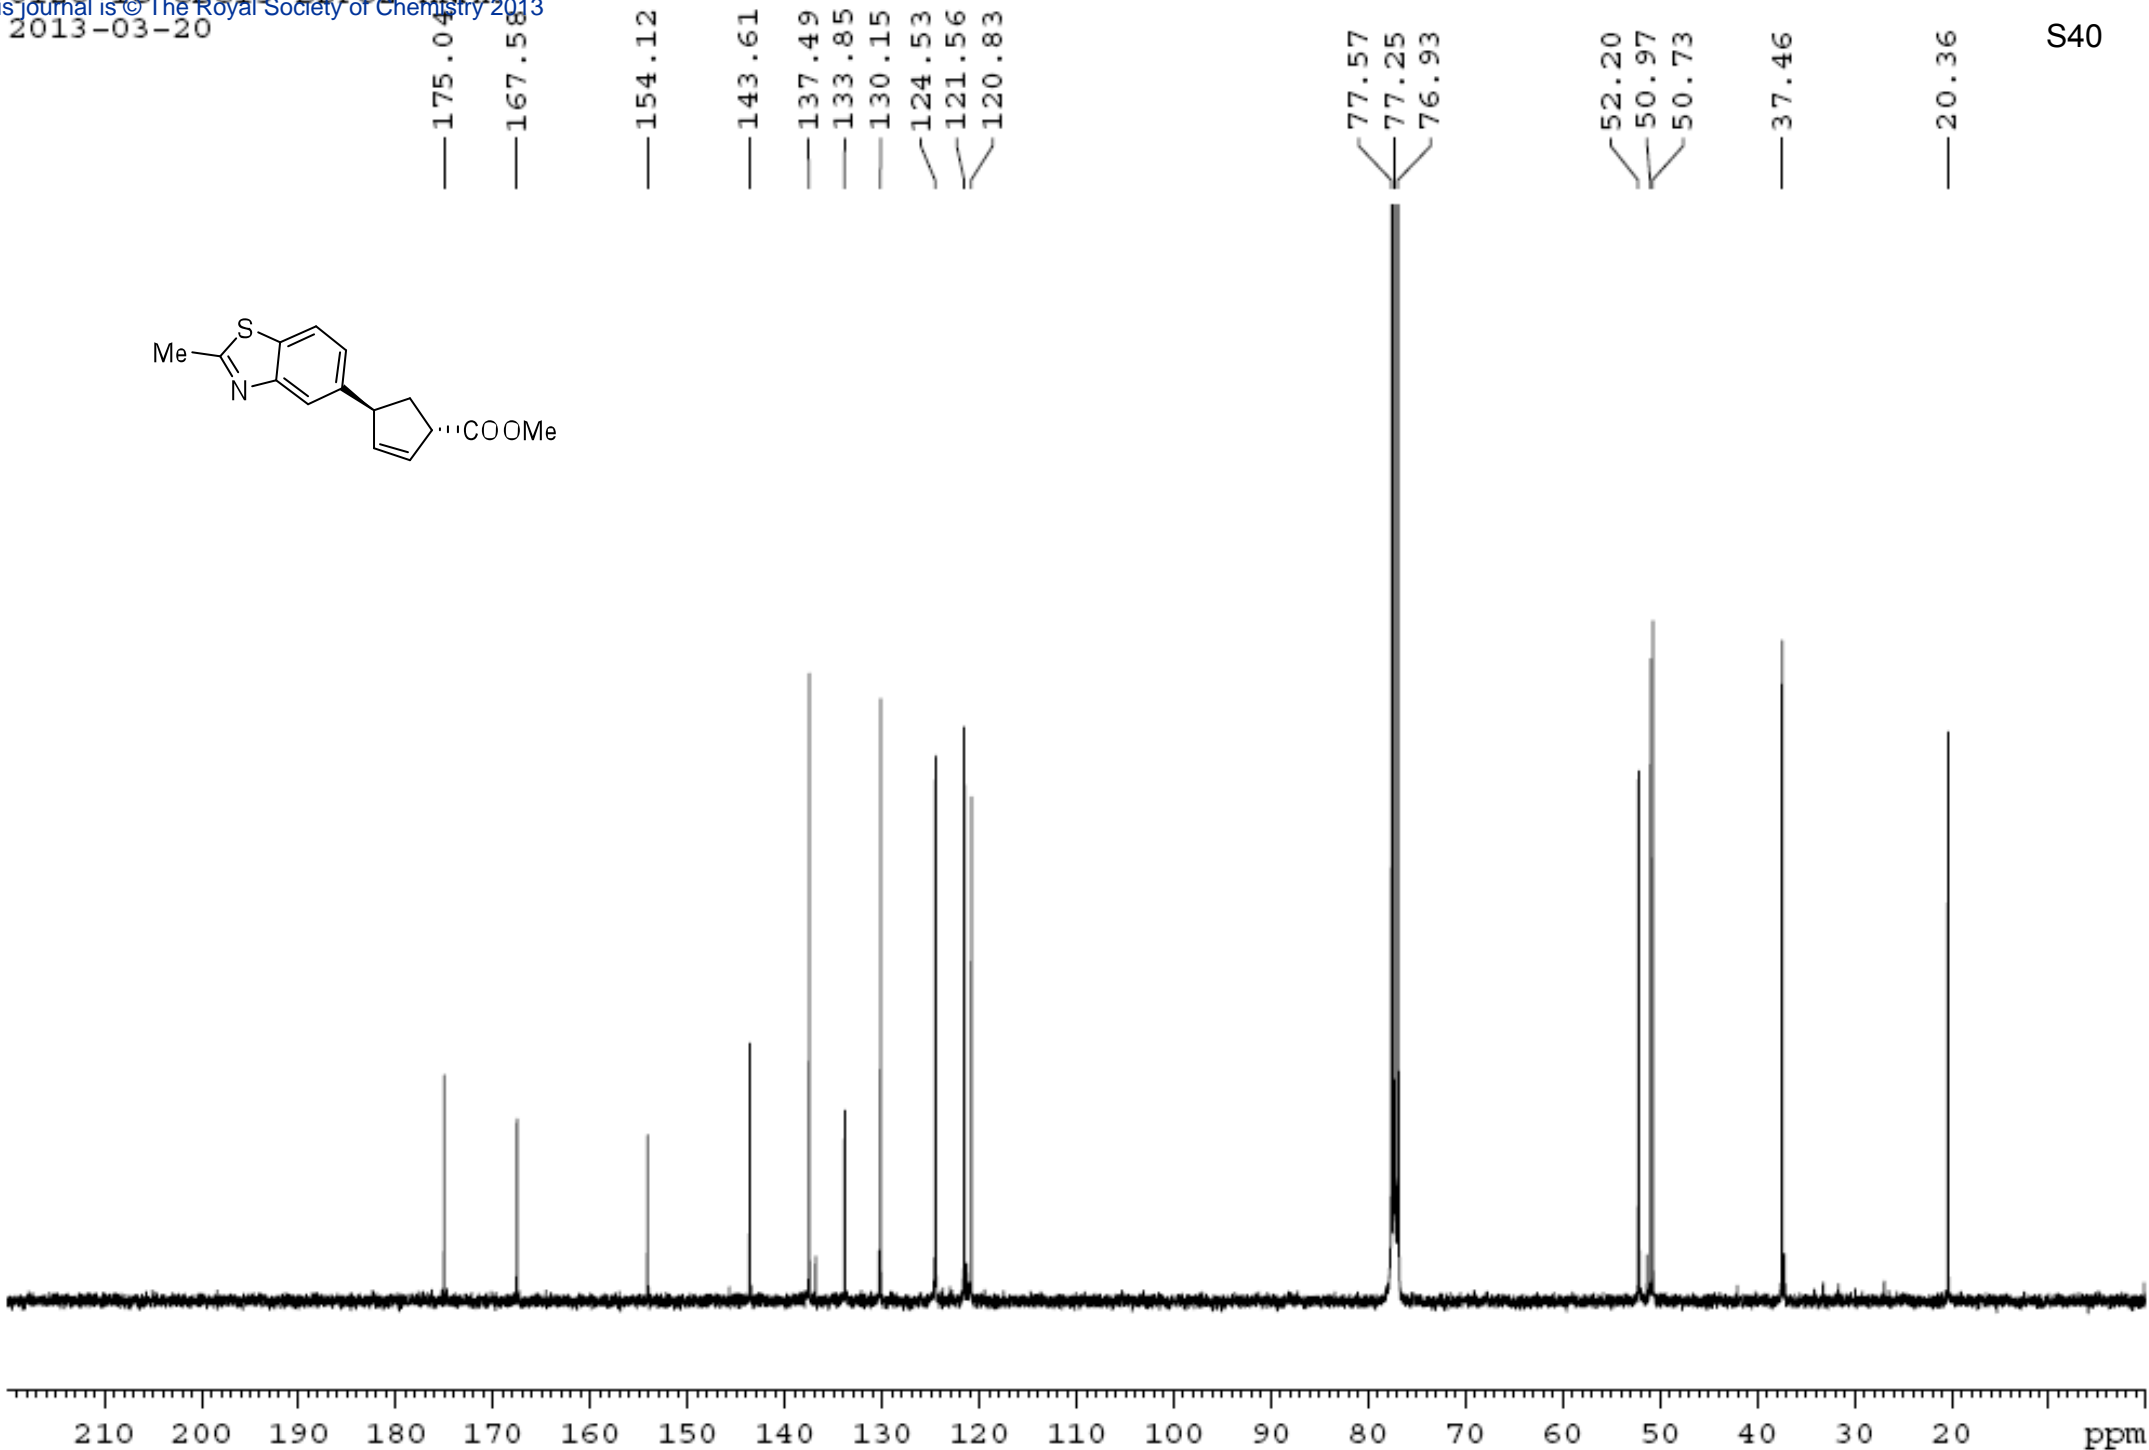



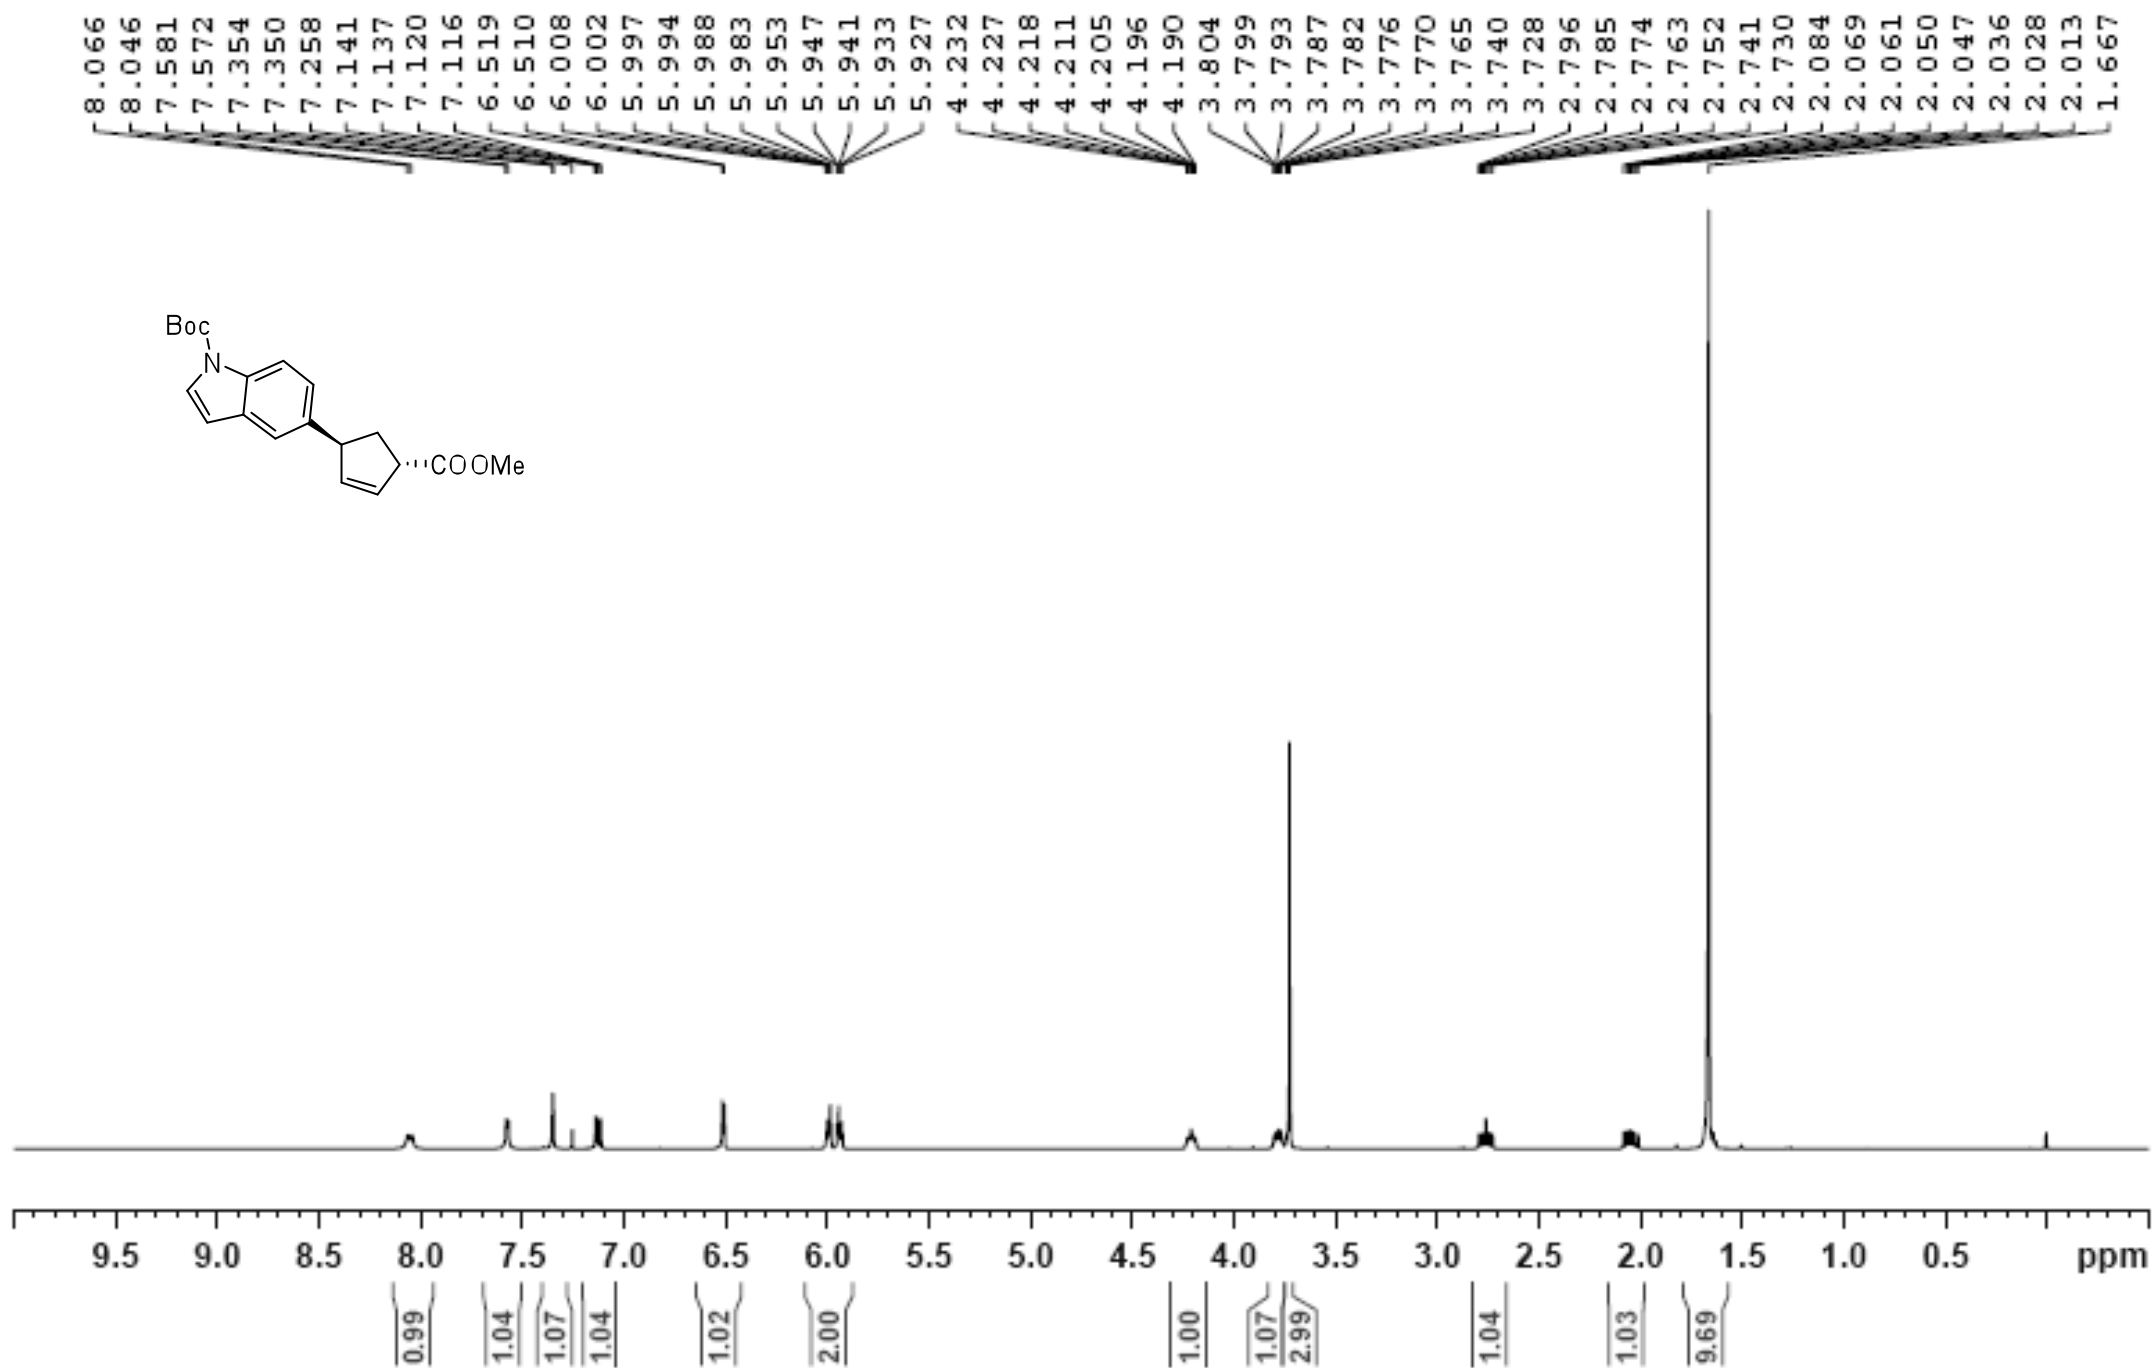

6131-1c CDCl<sub>3</sub> BBF02 HNMR 2013-03-26

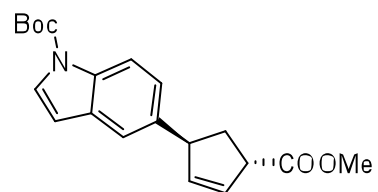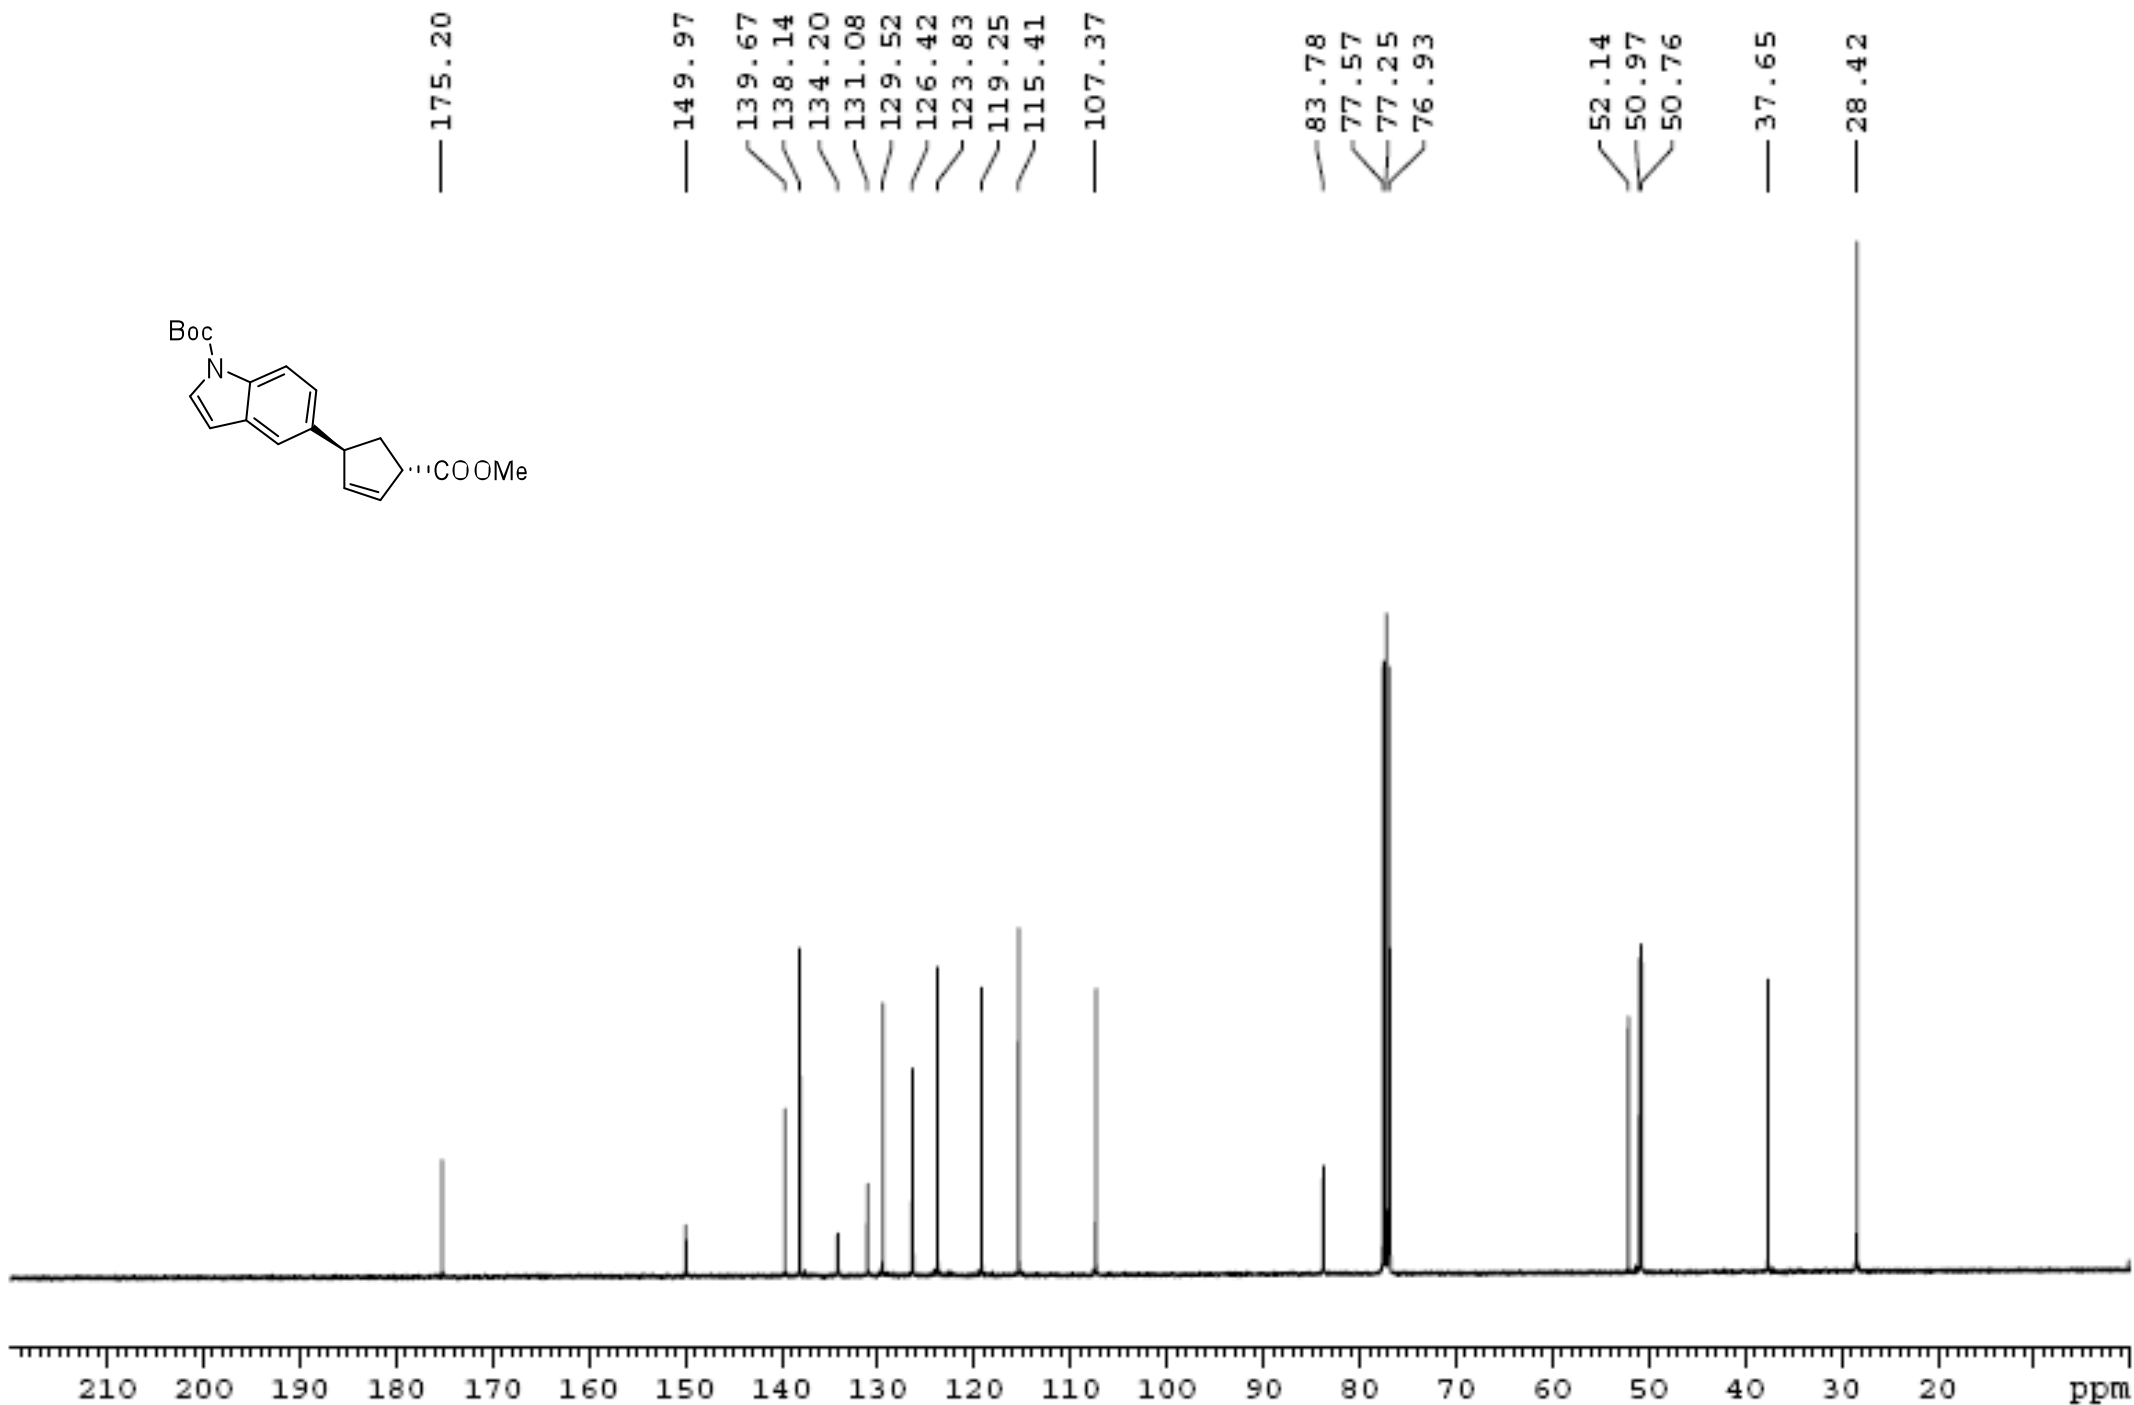

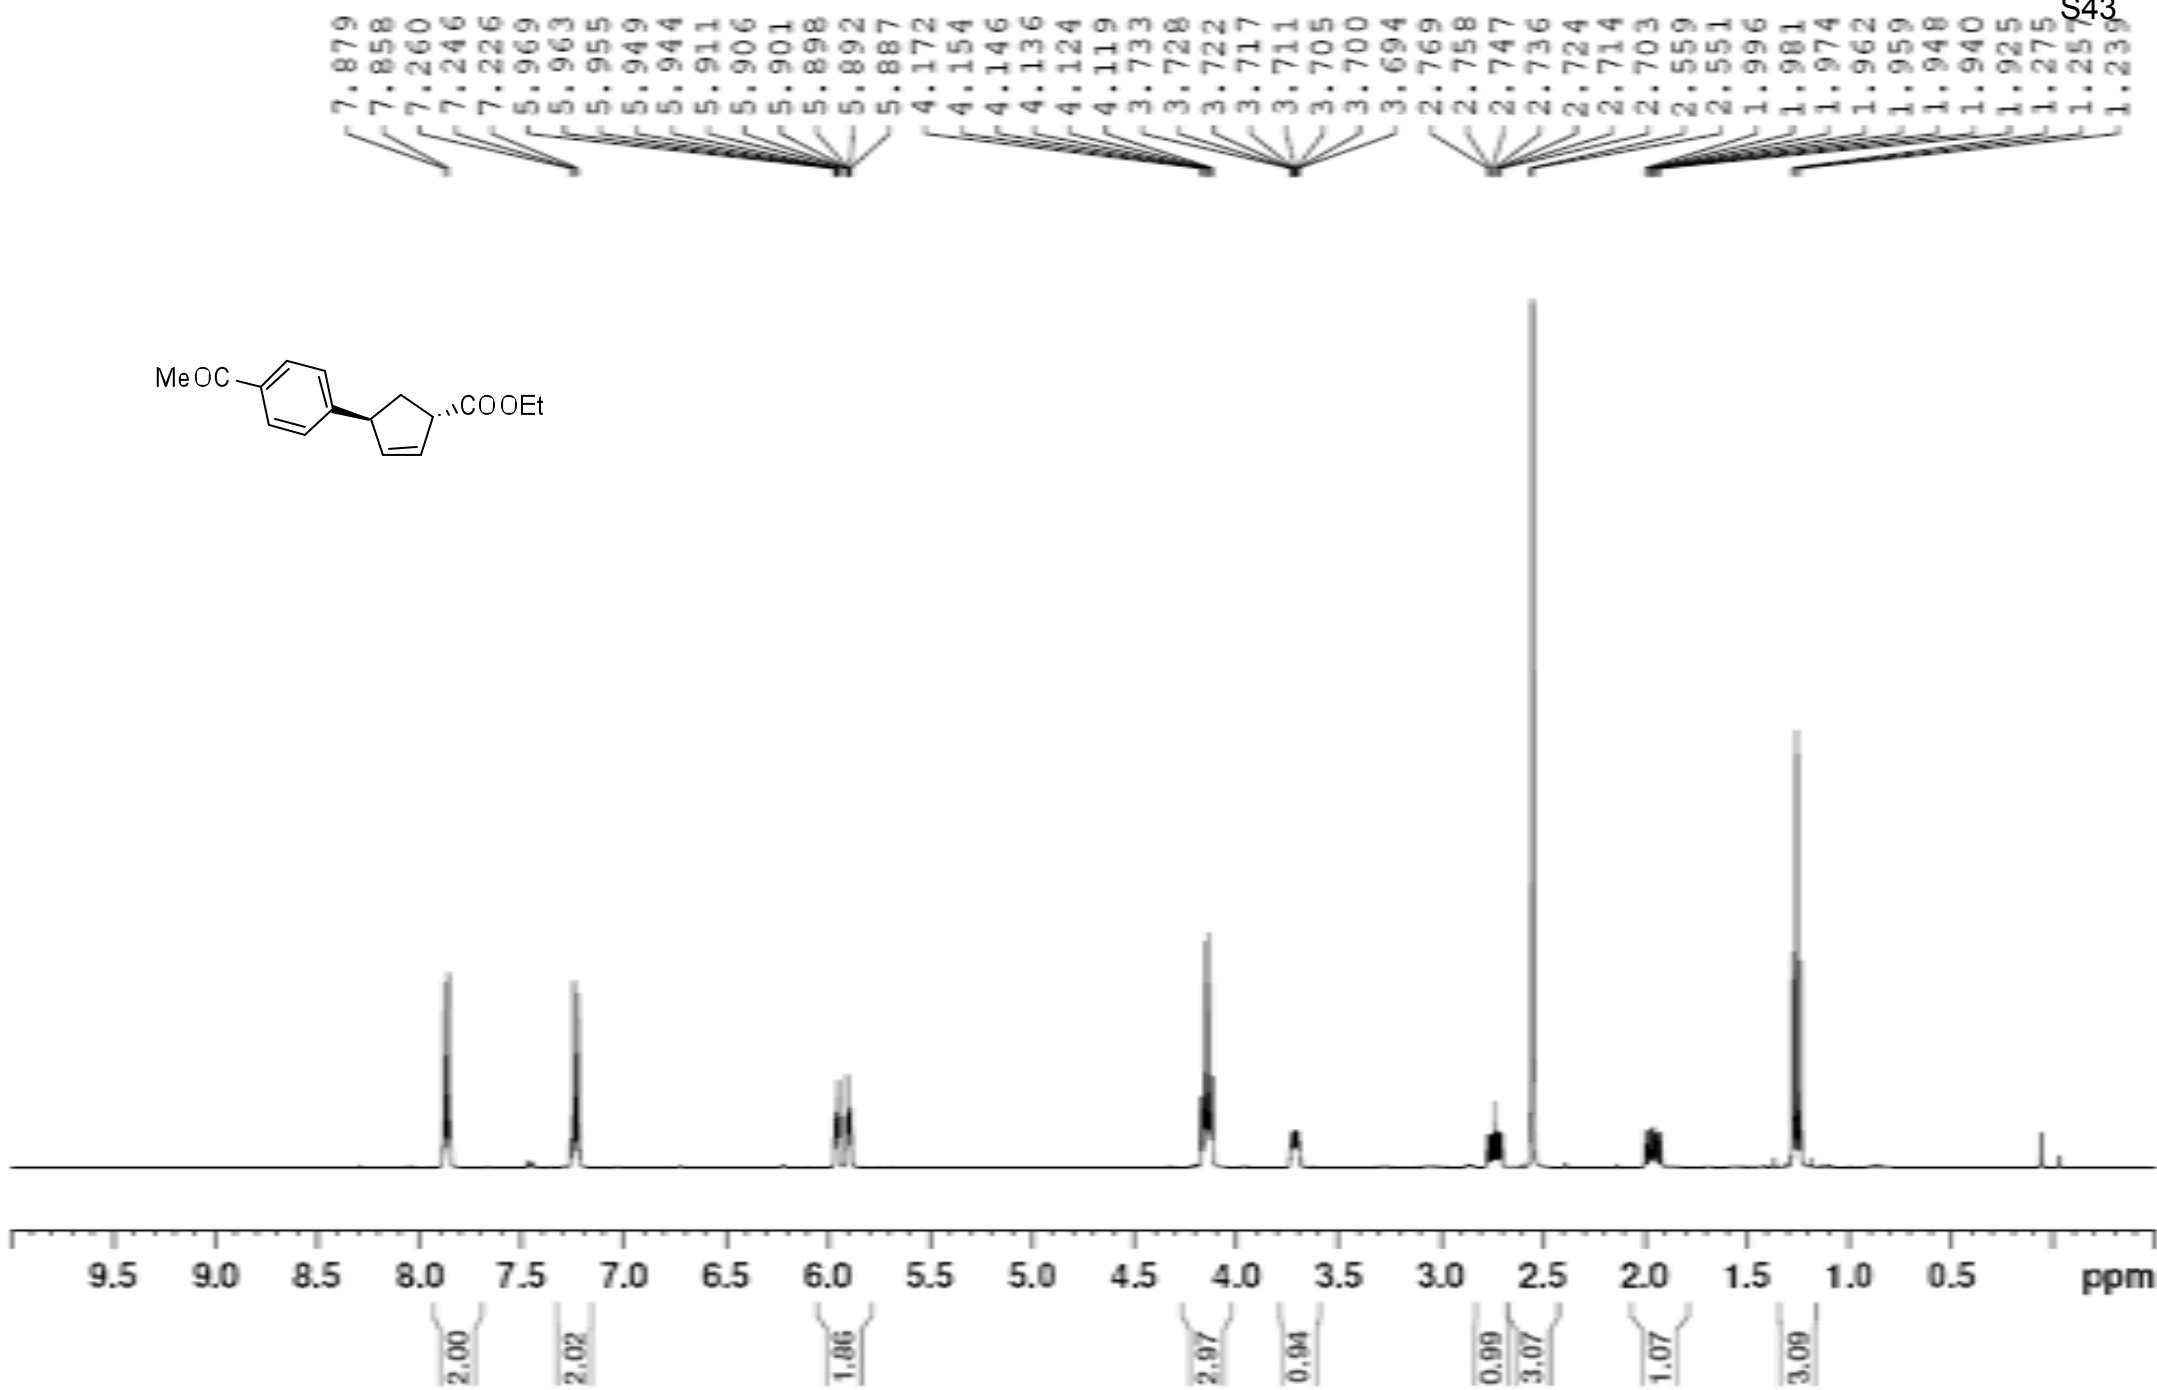

6063-3c CDC13 08 Dec 2012

S44

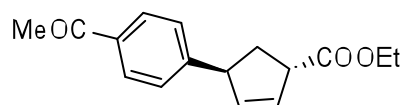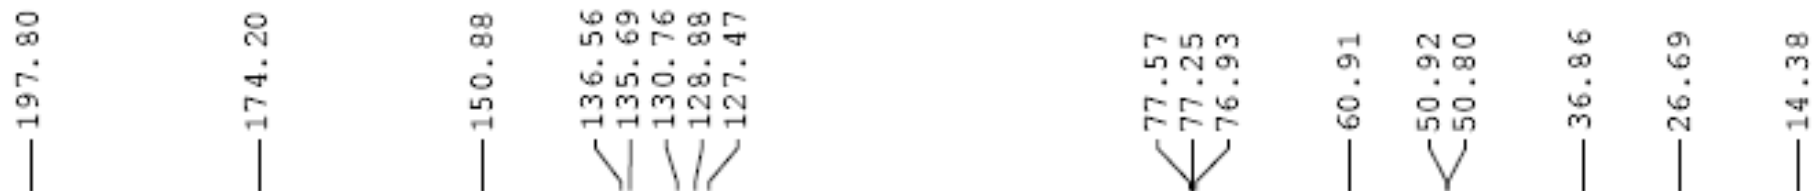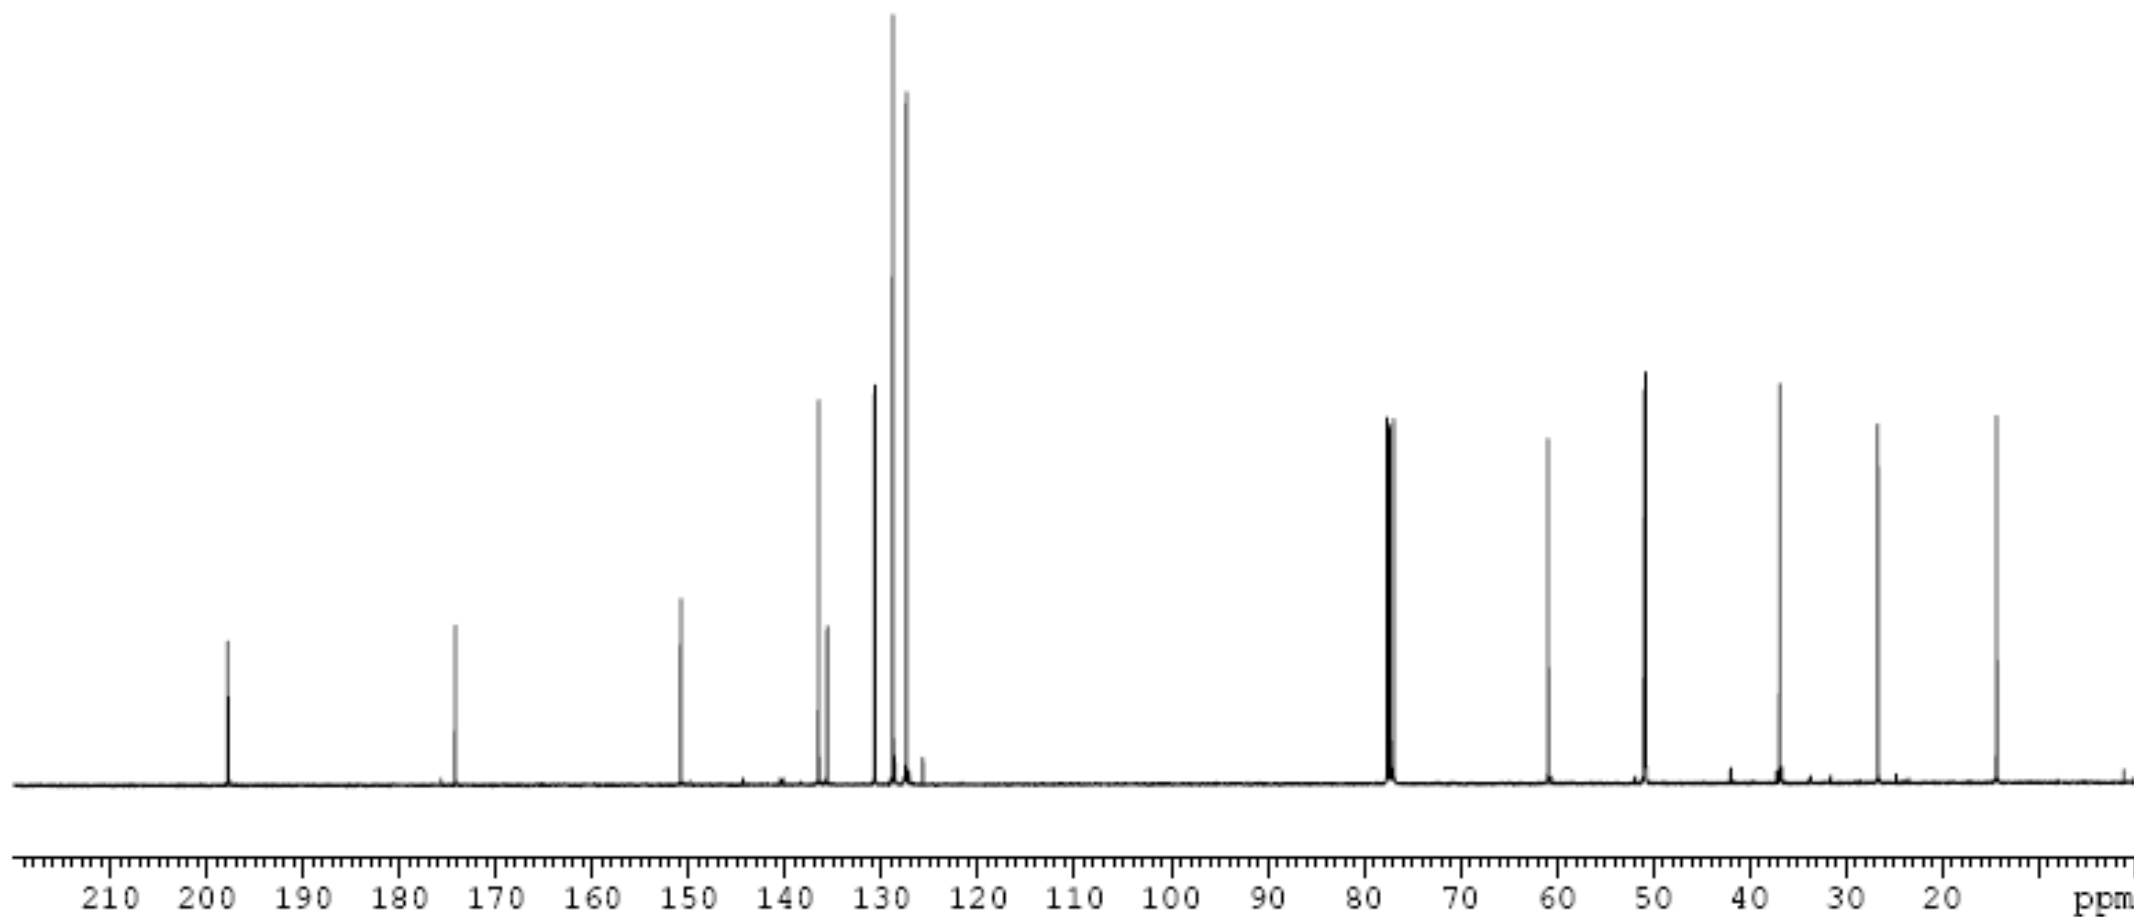

7.885  
7.856  
7.848  
7.830  
7.810  
7.297  
7.281  
7.263  
7.234  
5.983  
5.973  
5.961  
5.953  
5.942  
5.836  
5.828  
5.816  
5.806  
4.538  
4.034  
4.026  
4.016  
4.004  
3.994  
3.983  
3.975  
3.451  
3.437  
3.428  
3.416  
3.236  
3.218  
3.200  
3.189  
3.179  
3.169  
3.157  
3.136  
3.128  
2.553  
2.255  
2.241  
2.222  
2.204  
2.194  
2.177  
2.163  
1.953  
1.935  
1.922  
1.910  
1.894  
1.884

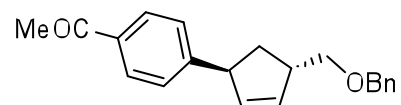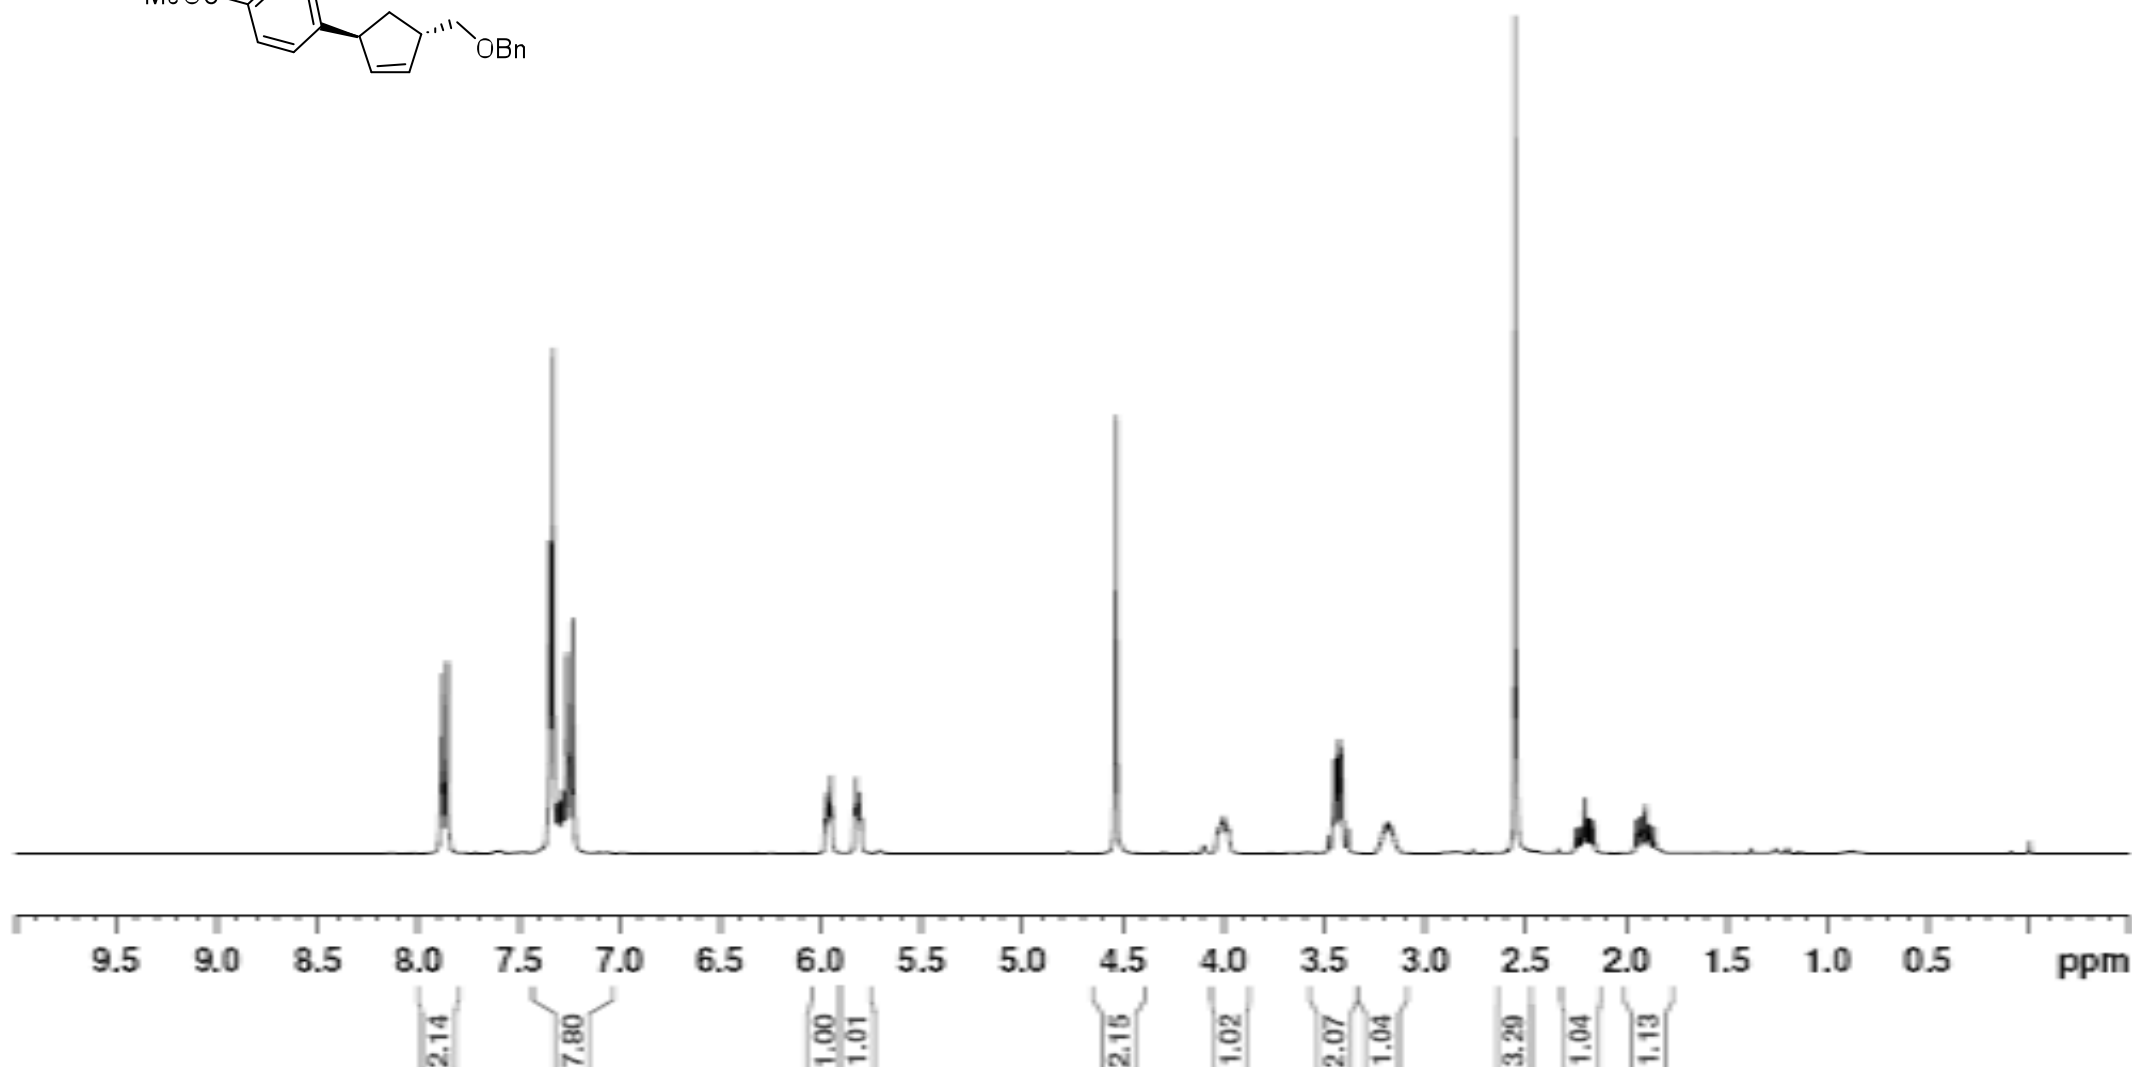

— 197.85

— 151.92

138.63

135.45

134.80

134.23

128.79

128.51

127.79

127.71

127.69

127.46

77.66

77.23

76.81

73.93

73.26

— 50.66

— 46.25

— 37.19

— 26.67

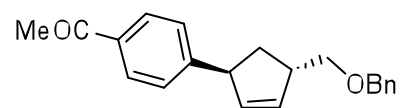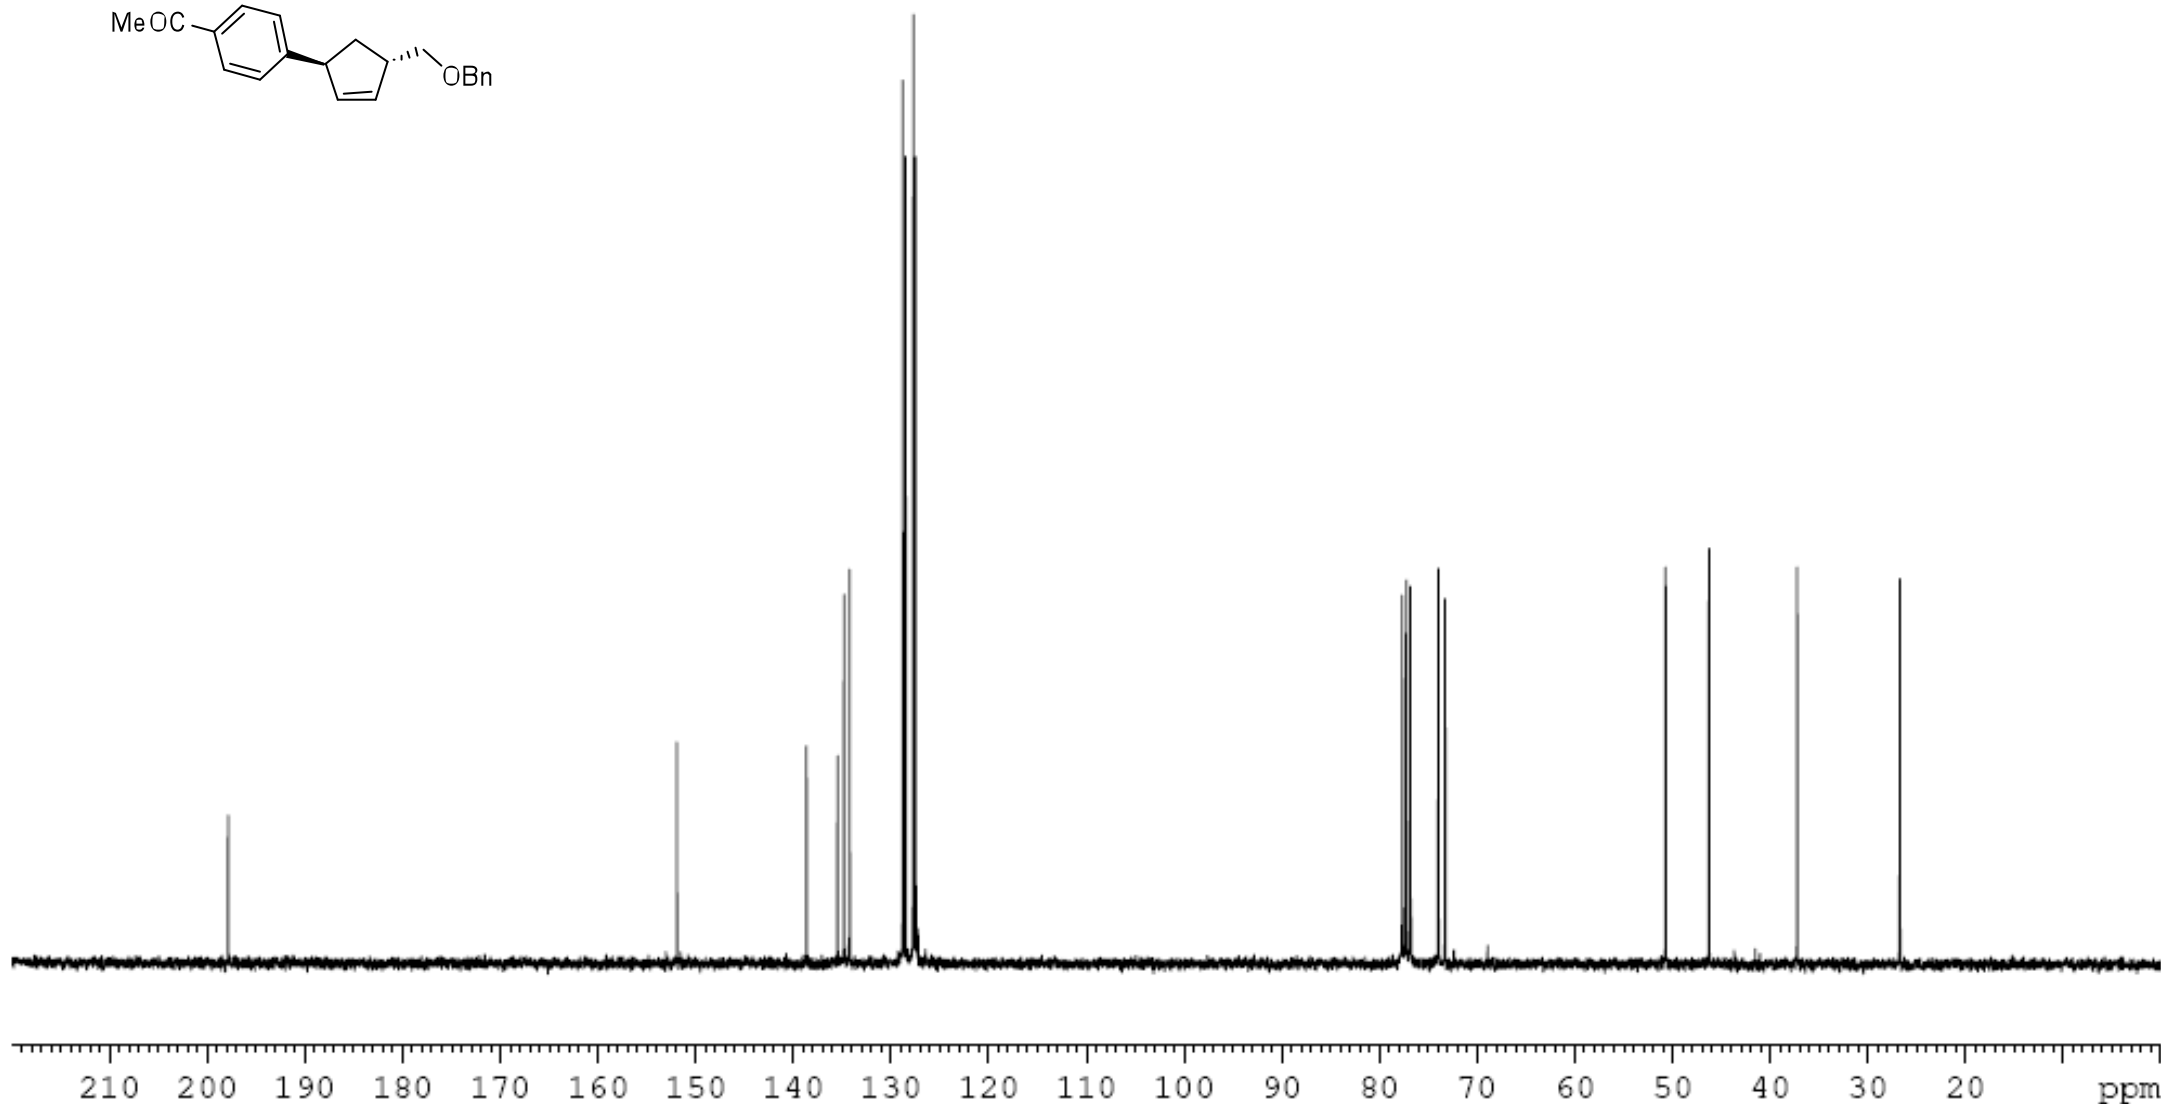

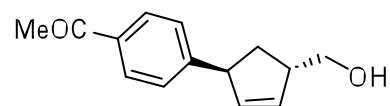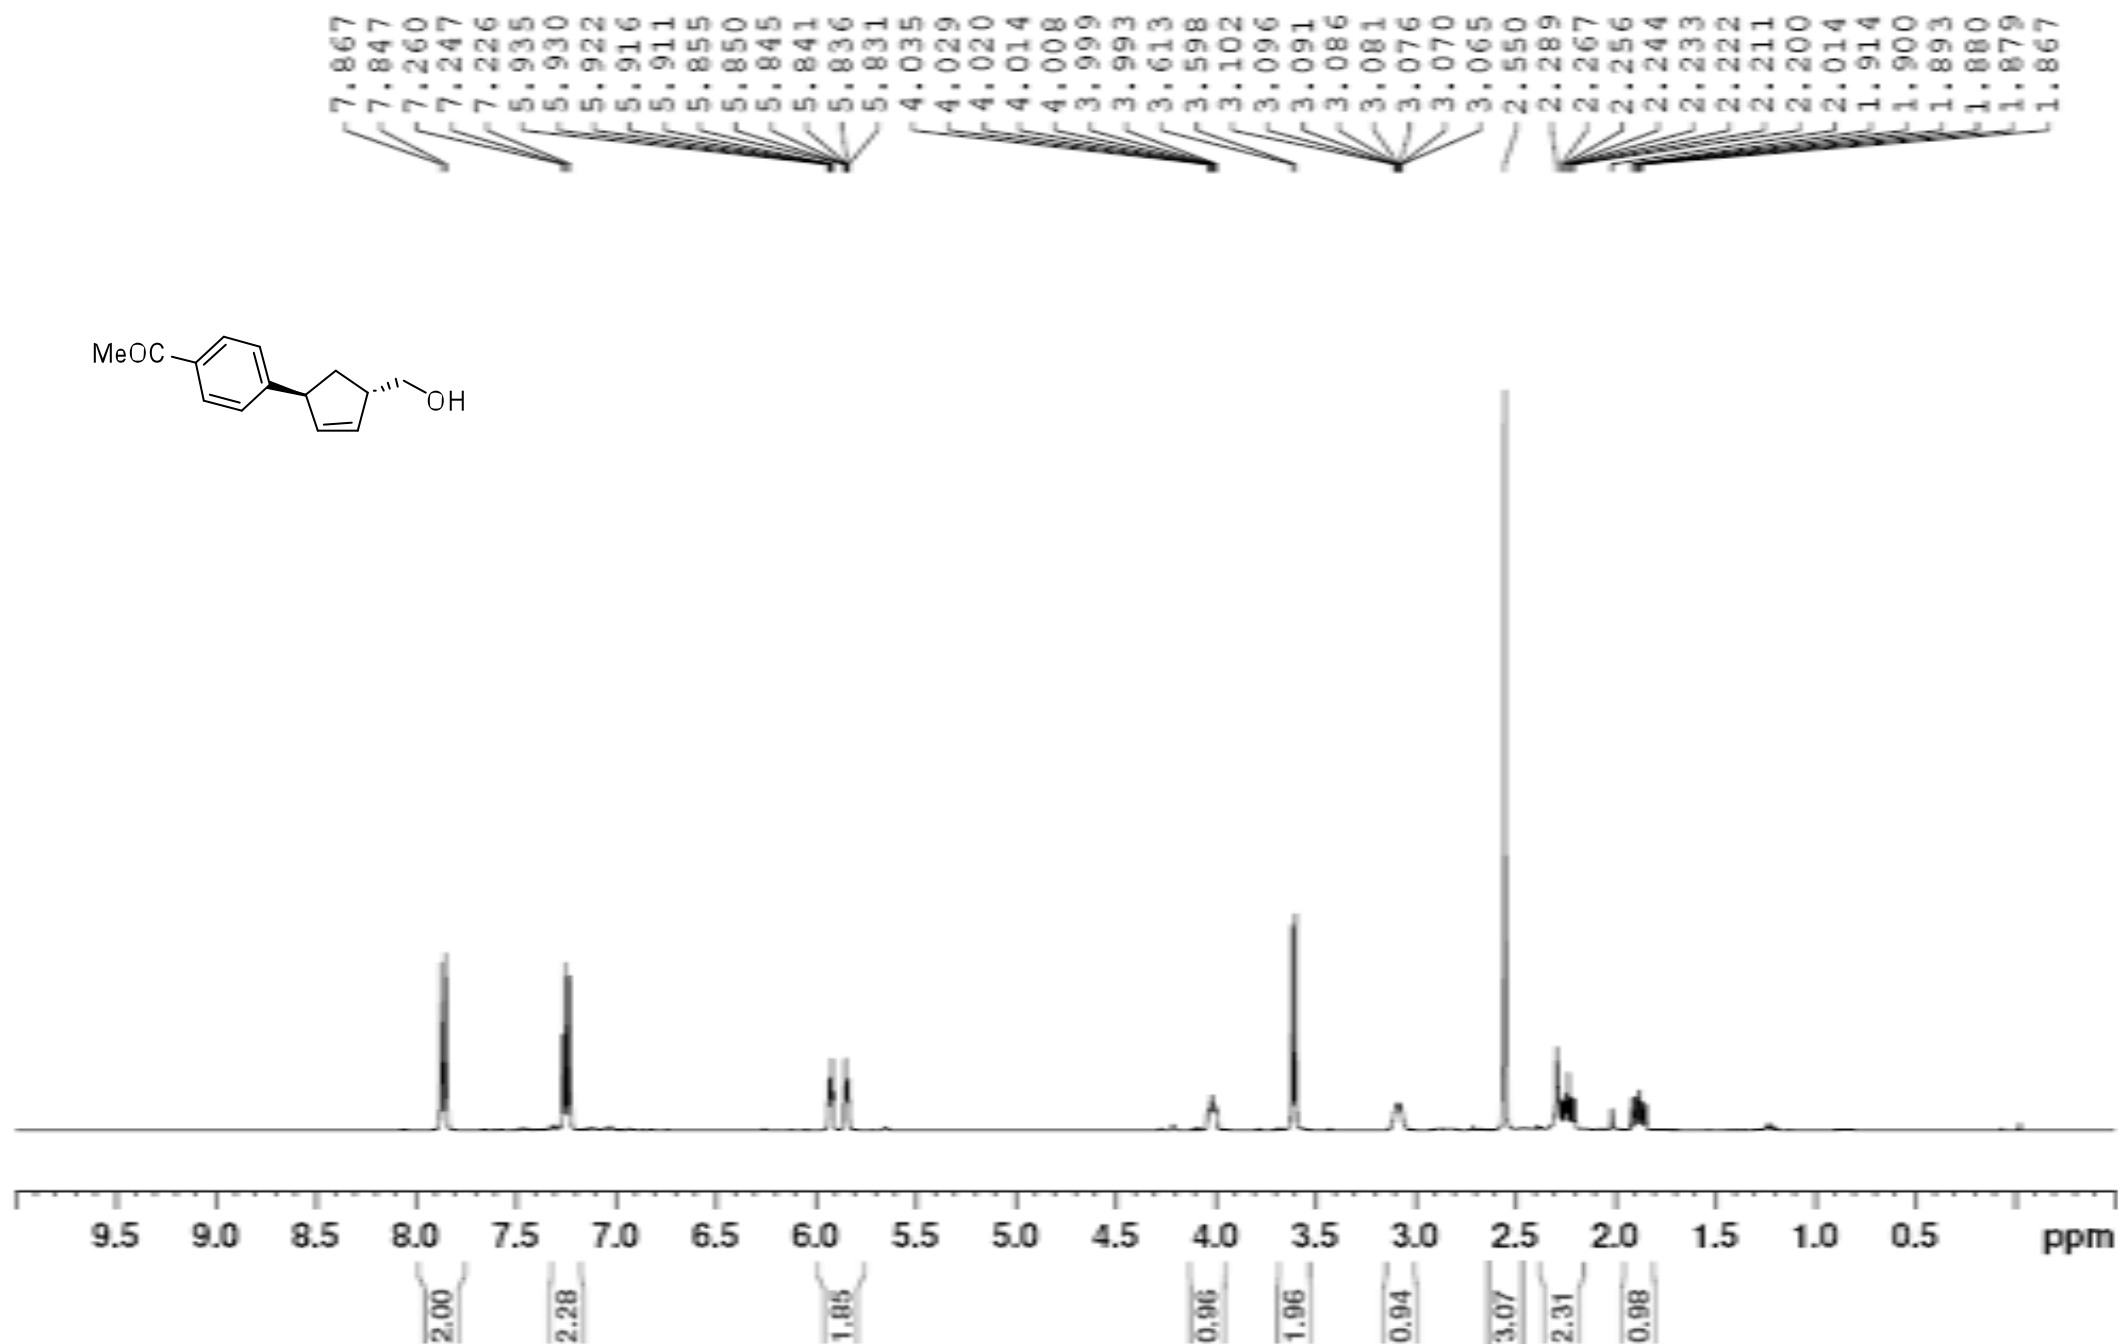

6063-2c CDCl<sub>3</sub> 11 Dec 2012

S48

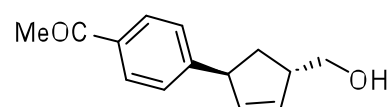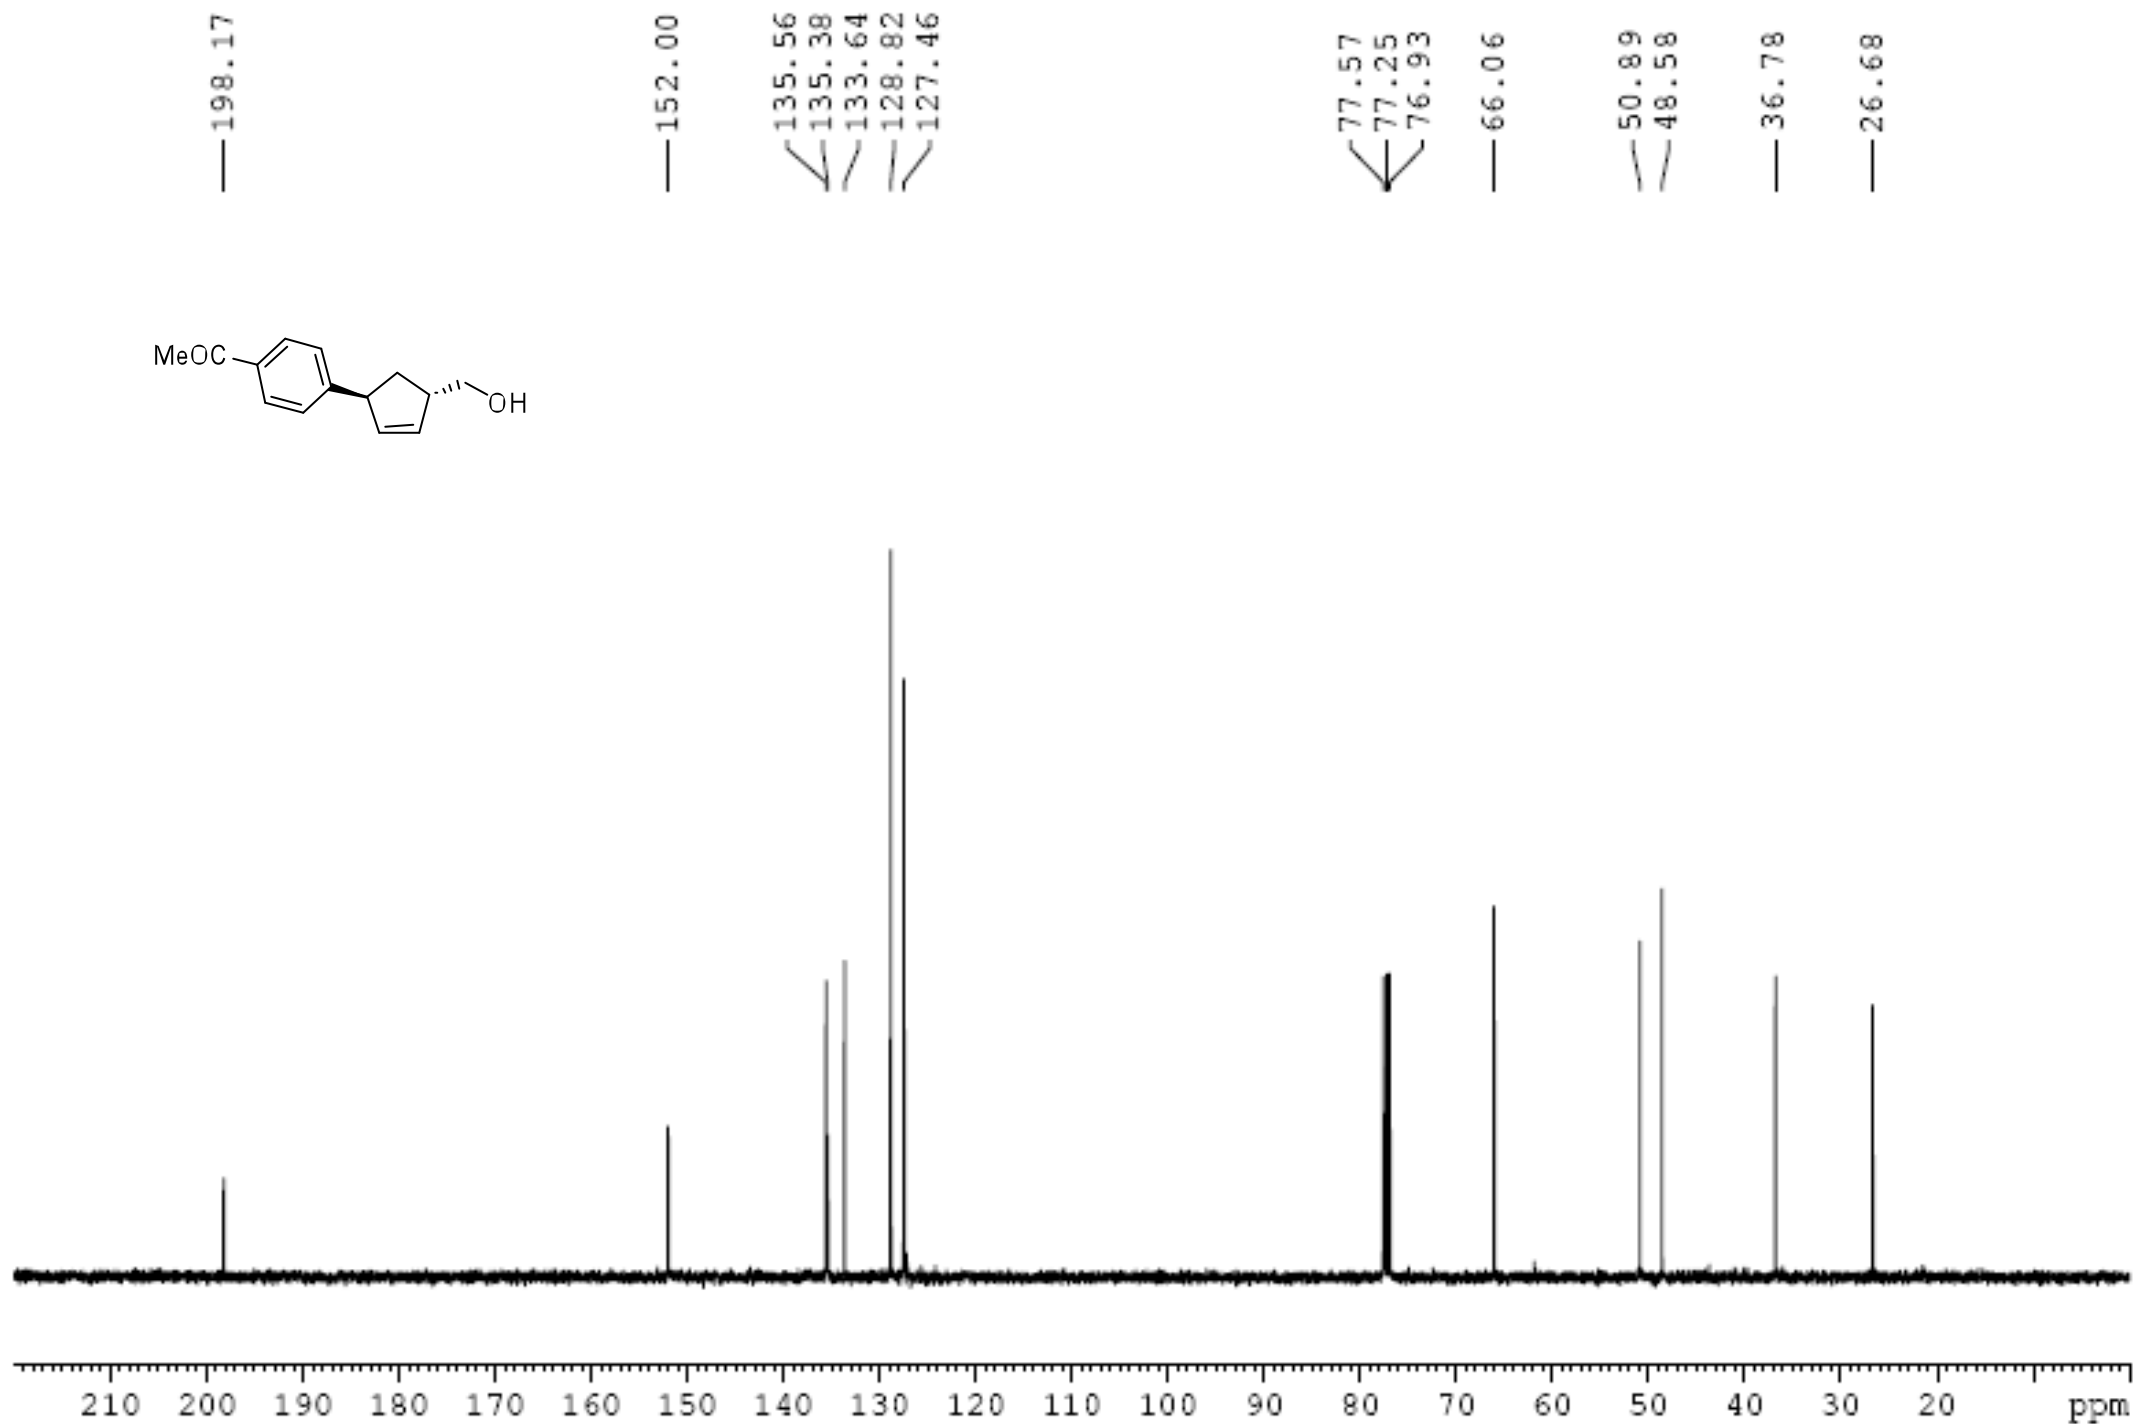



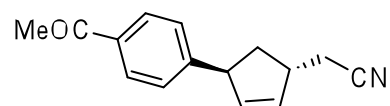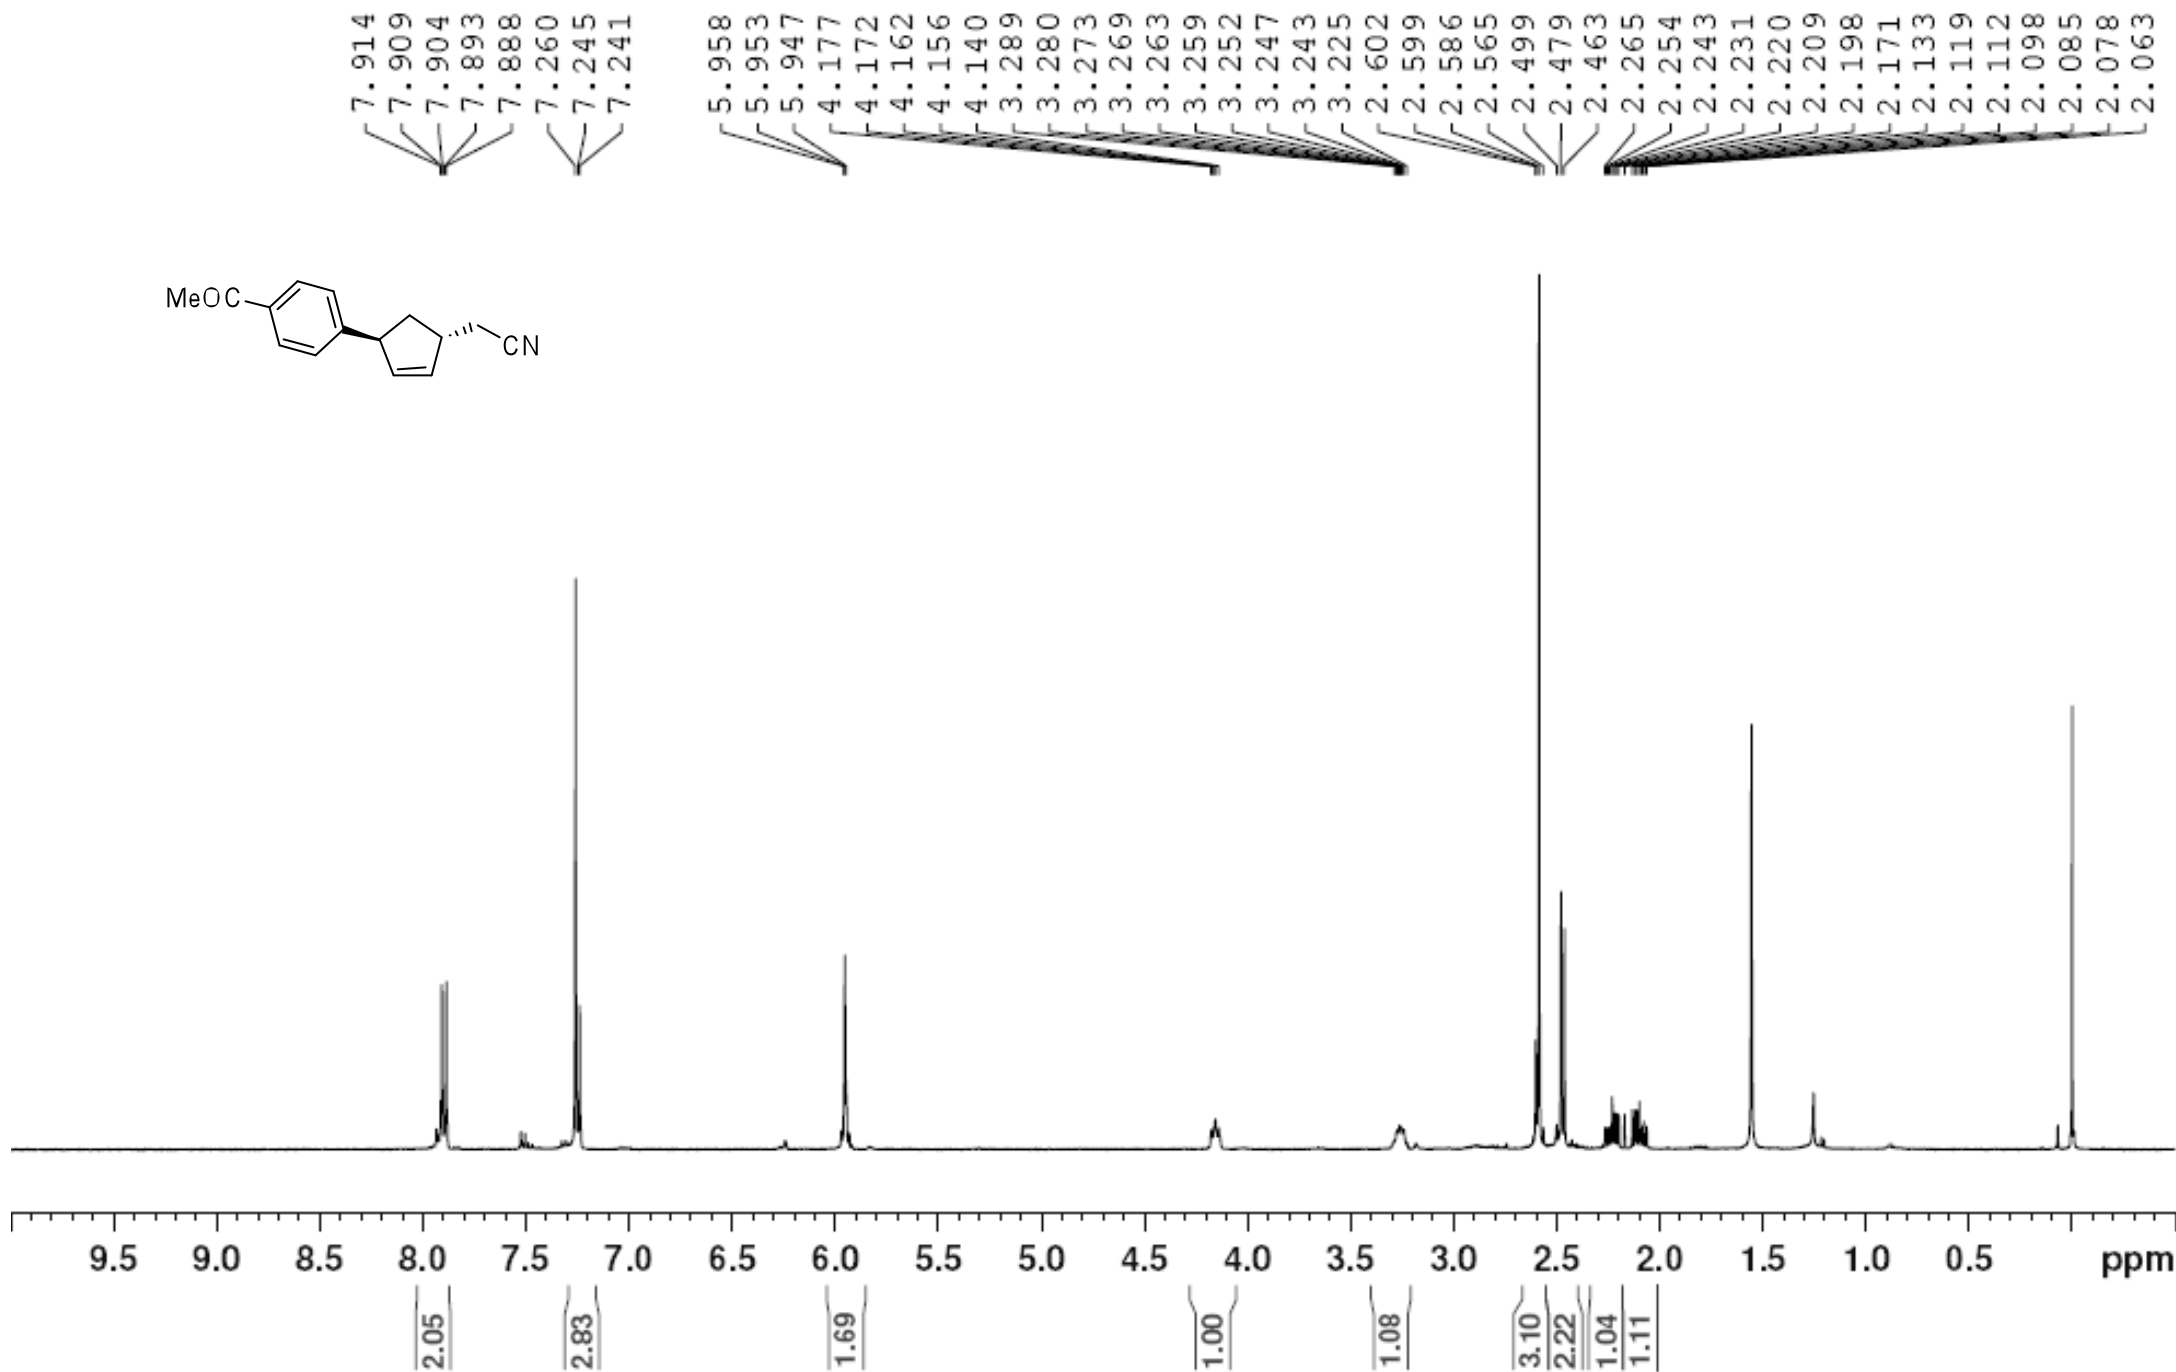

6076-2 BBF01 24 JAN 2013

S50

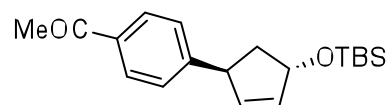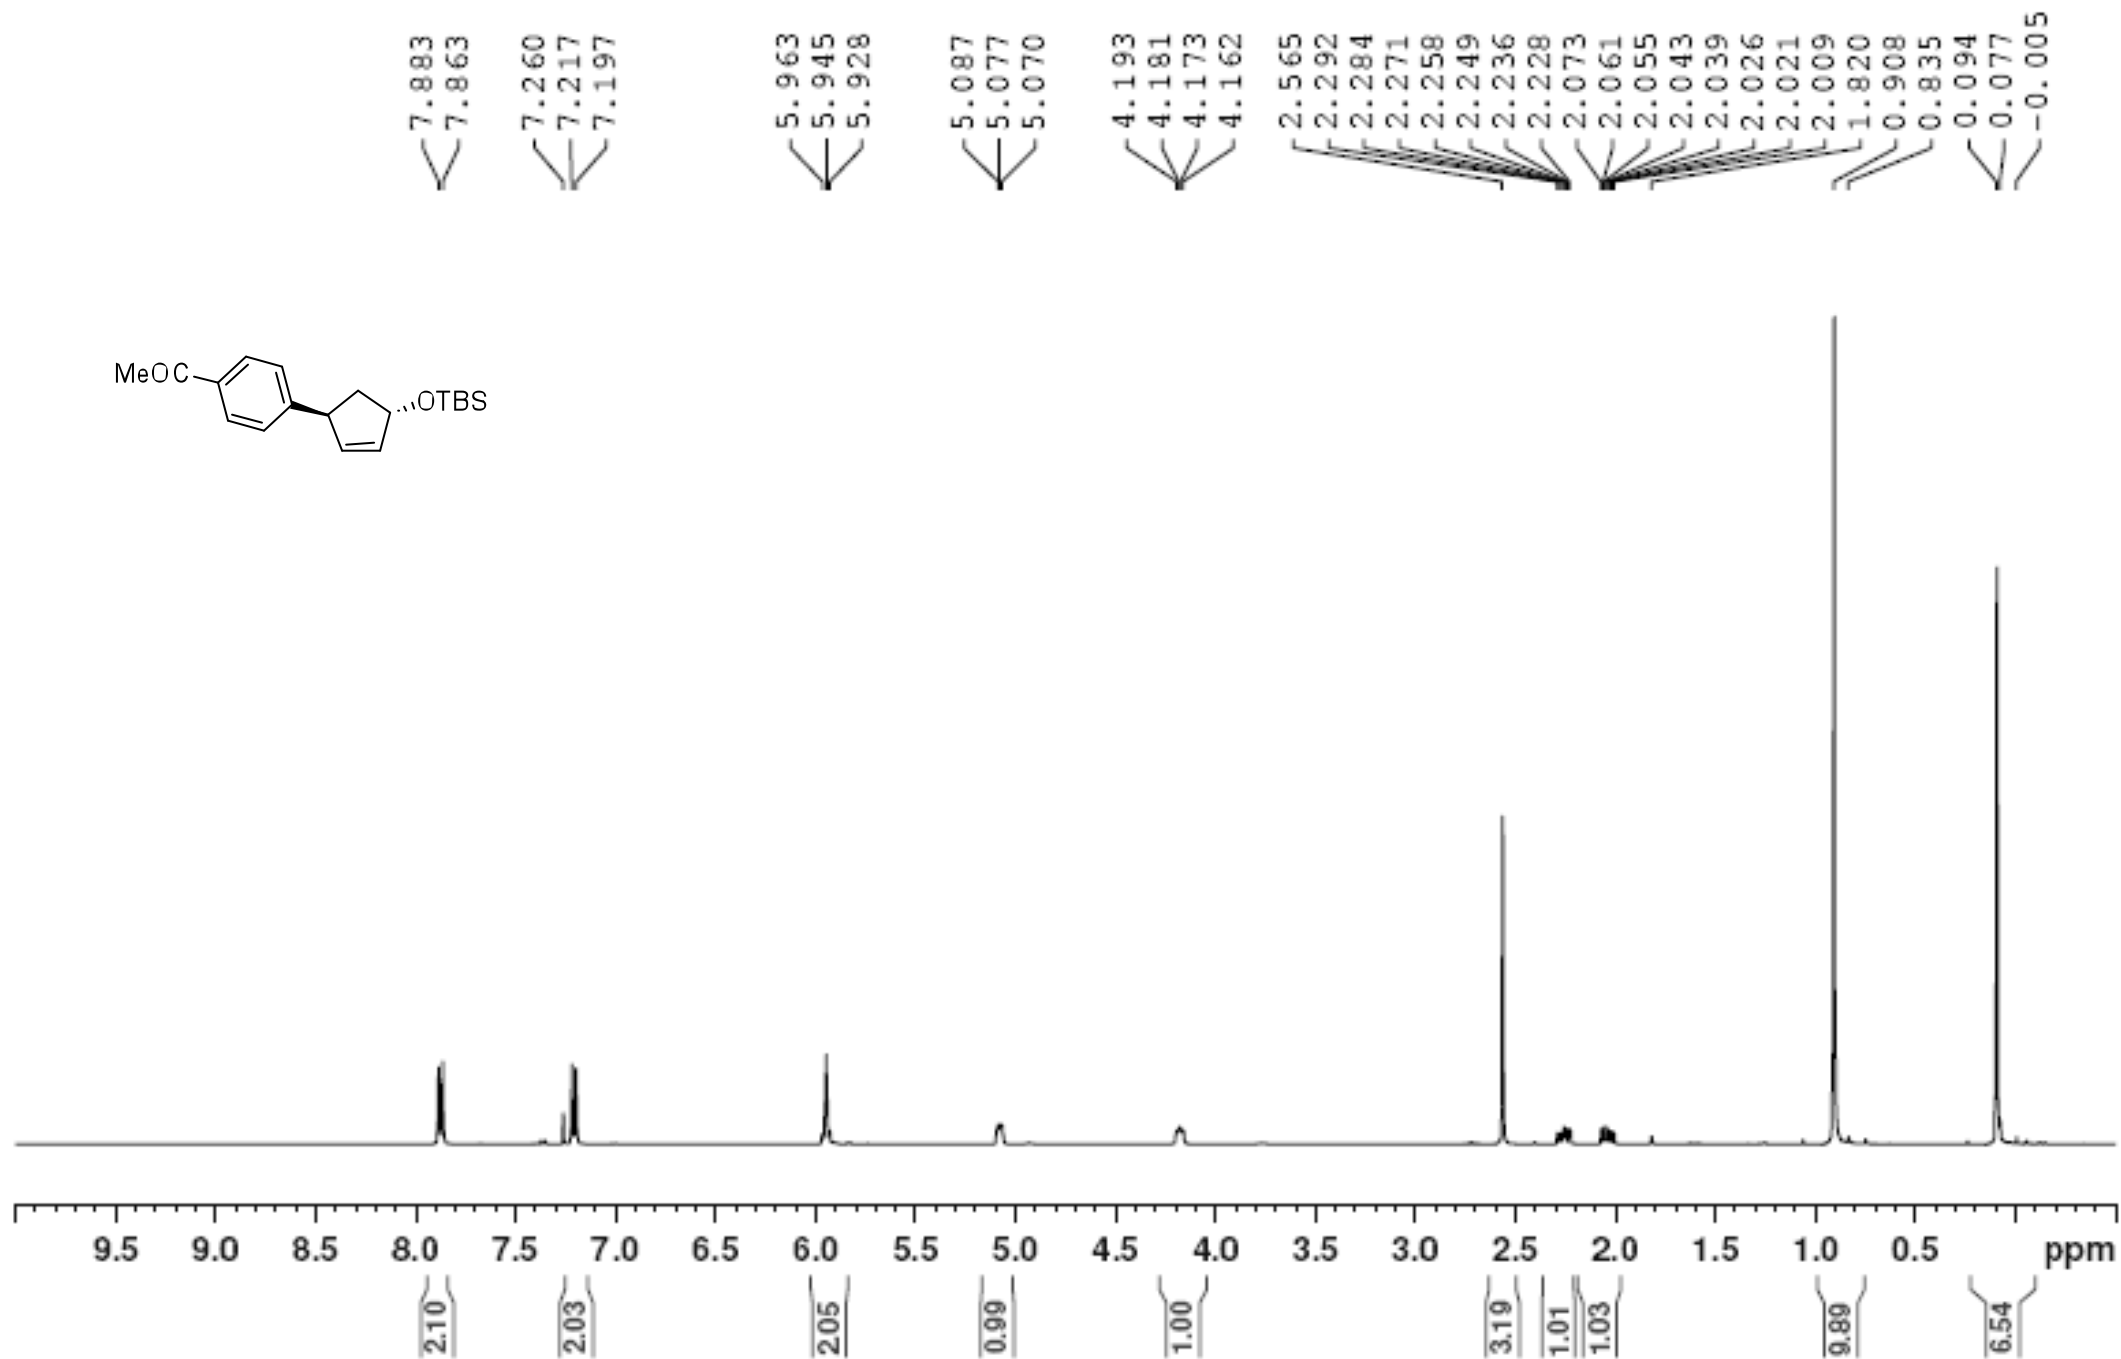

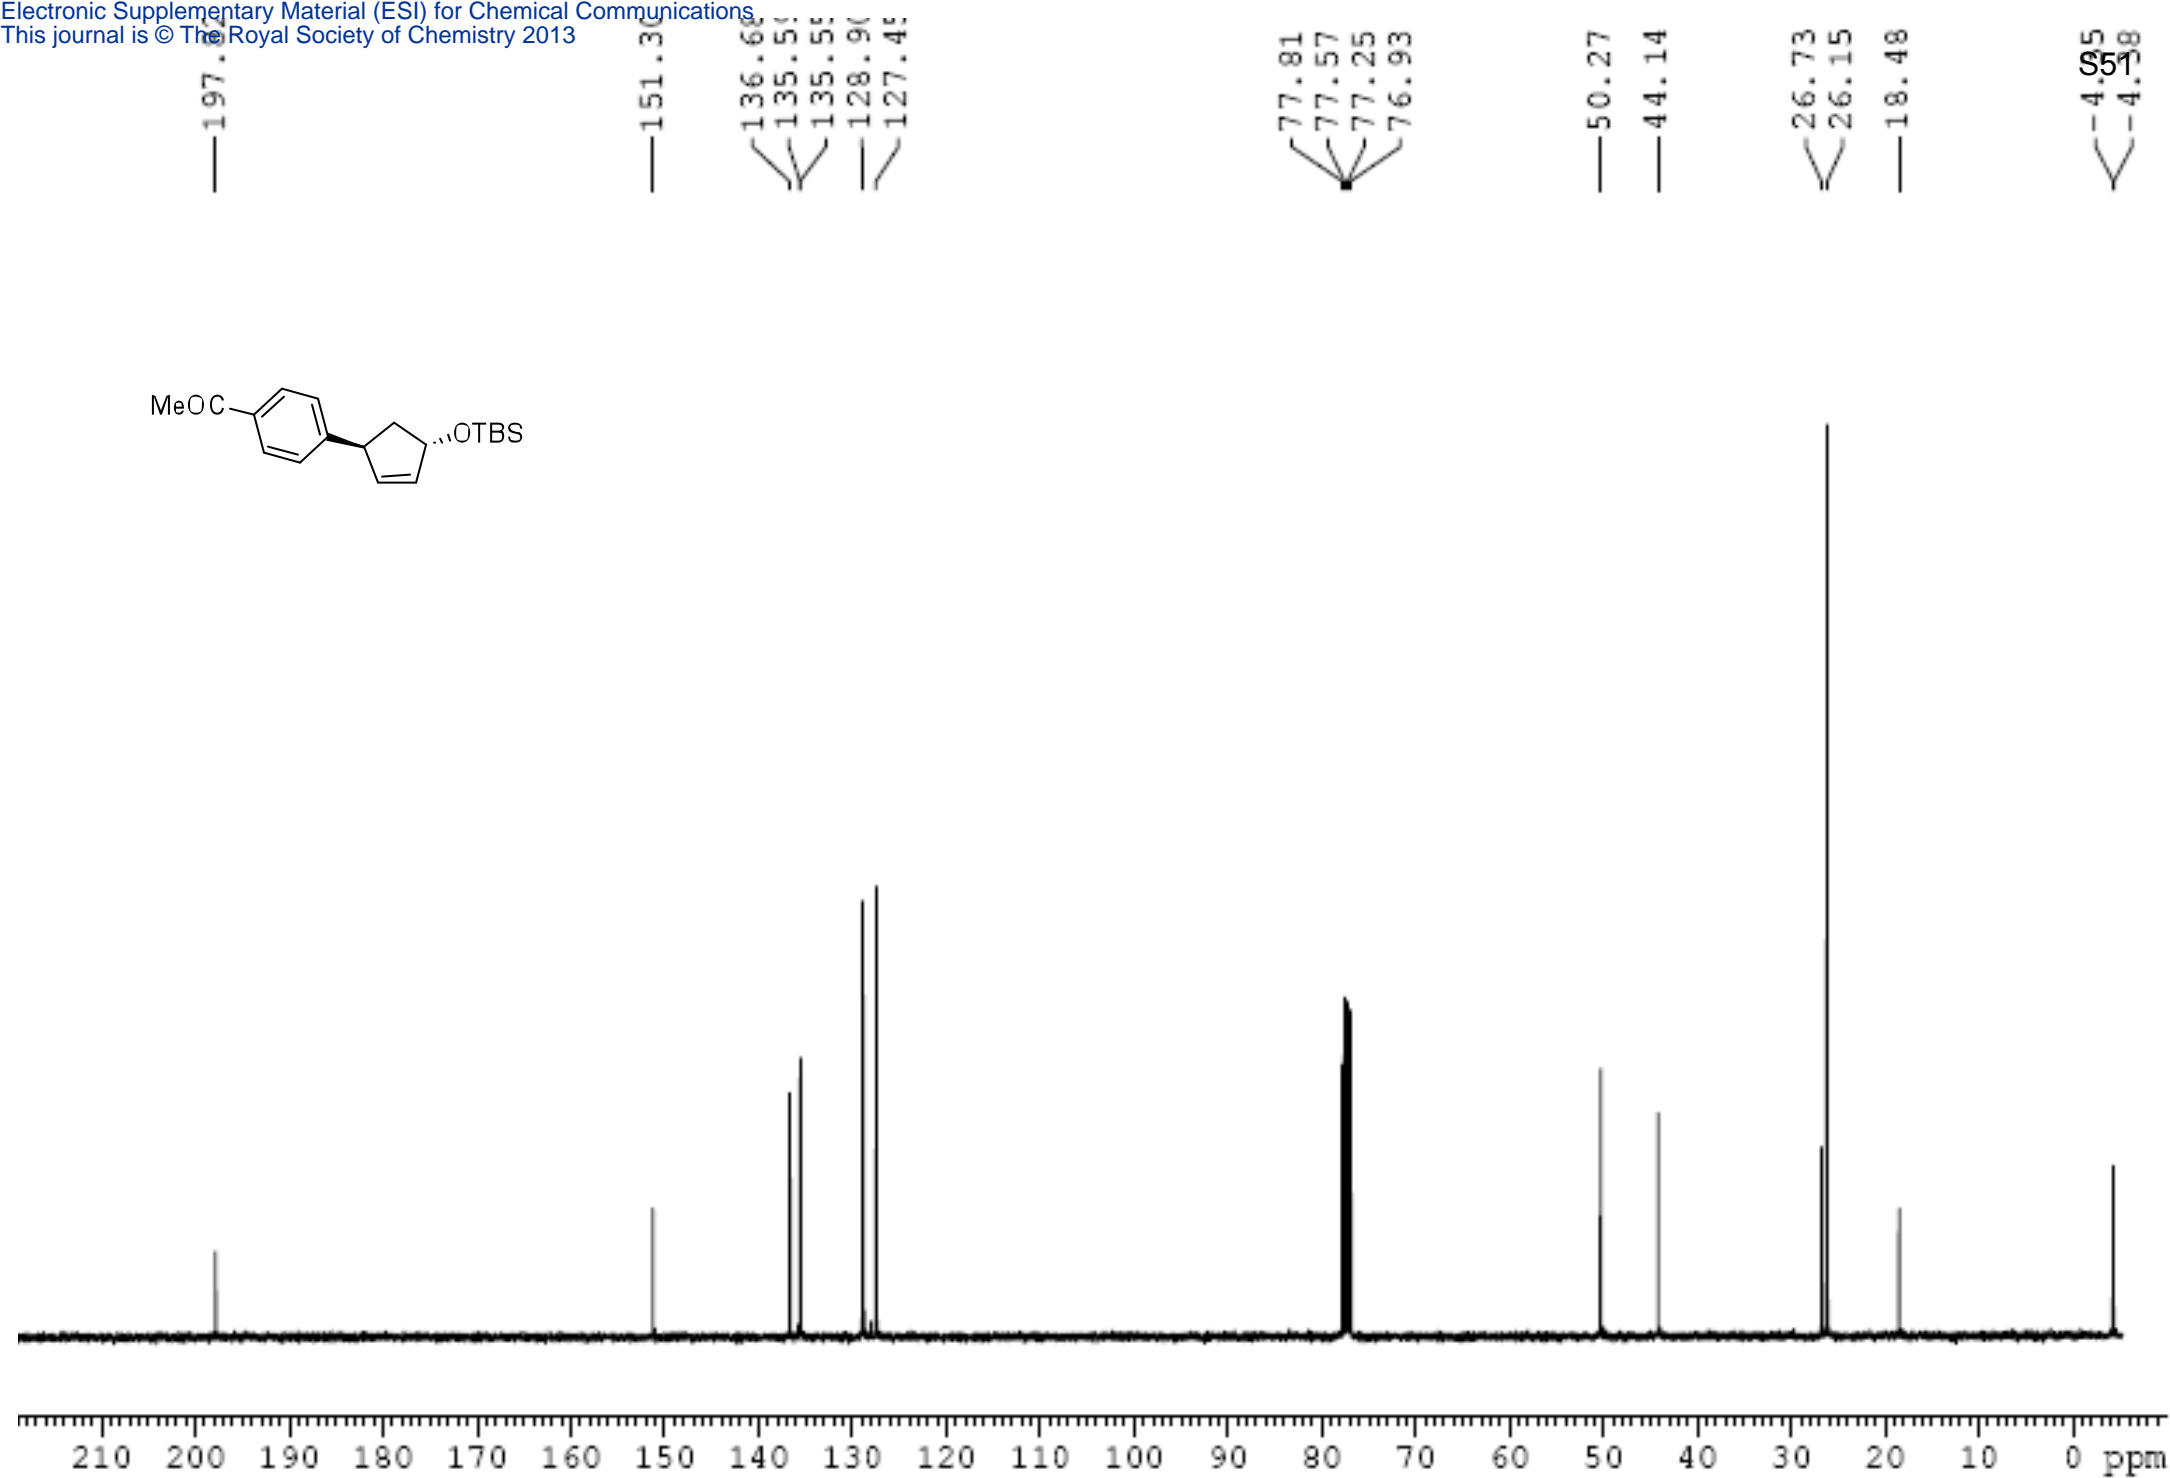

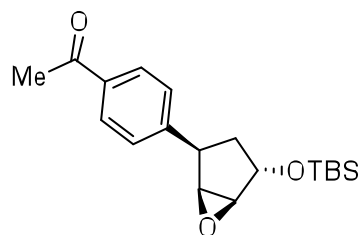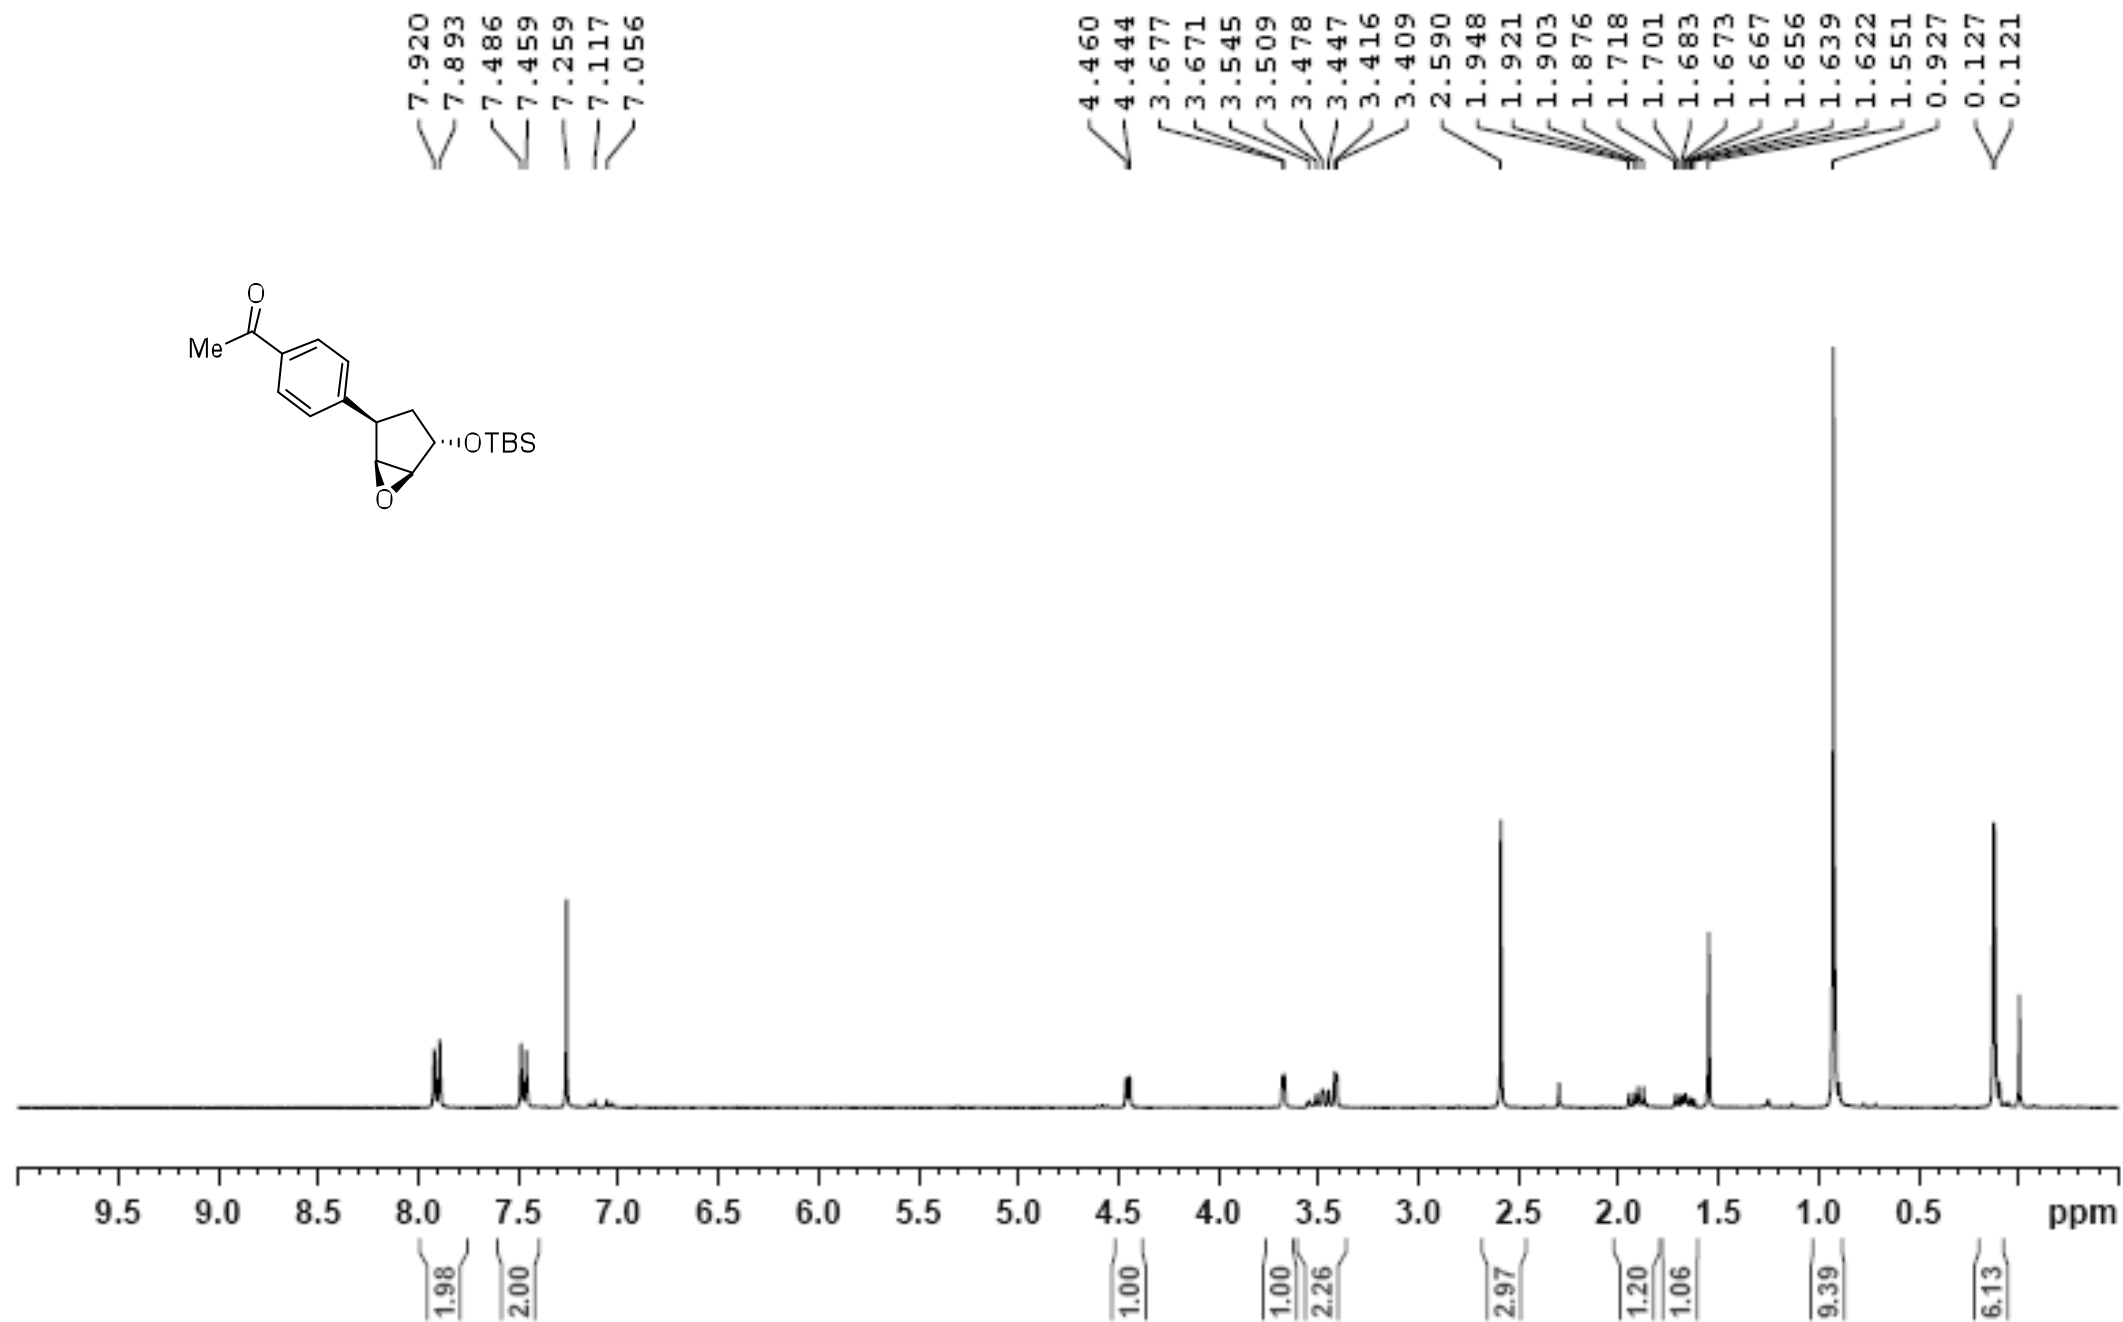

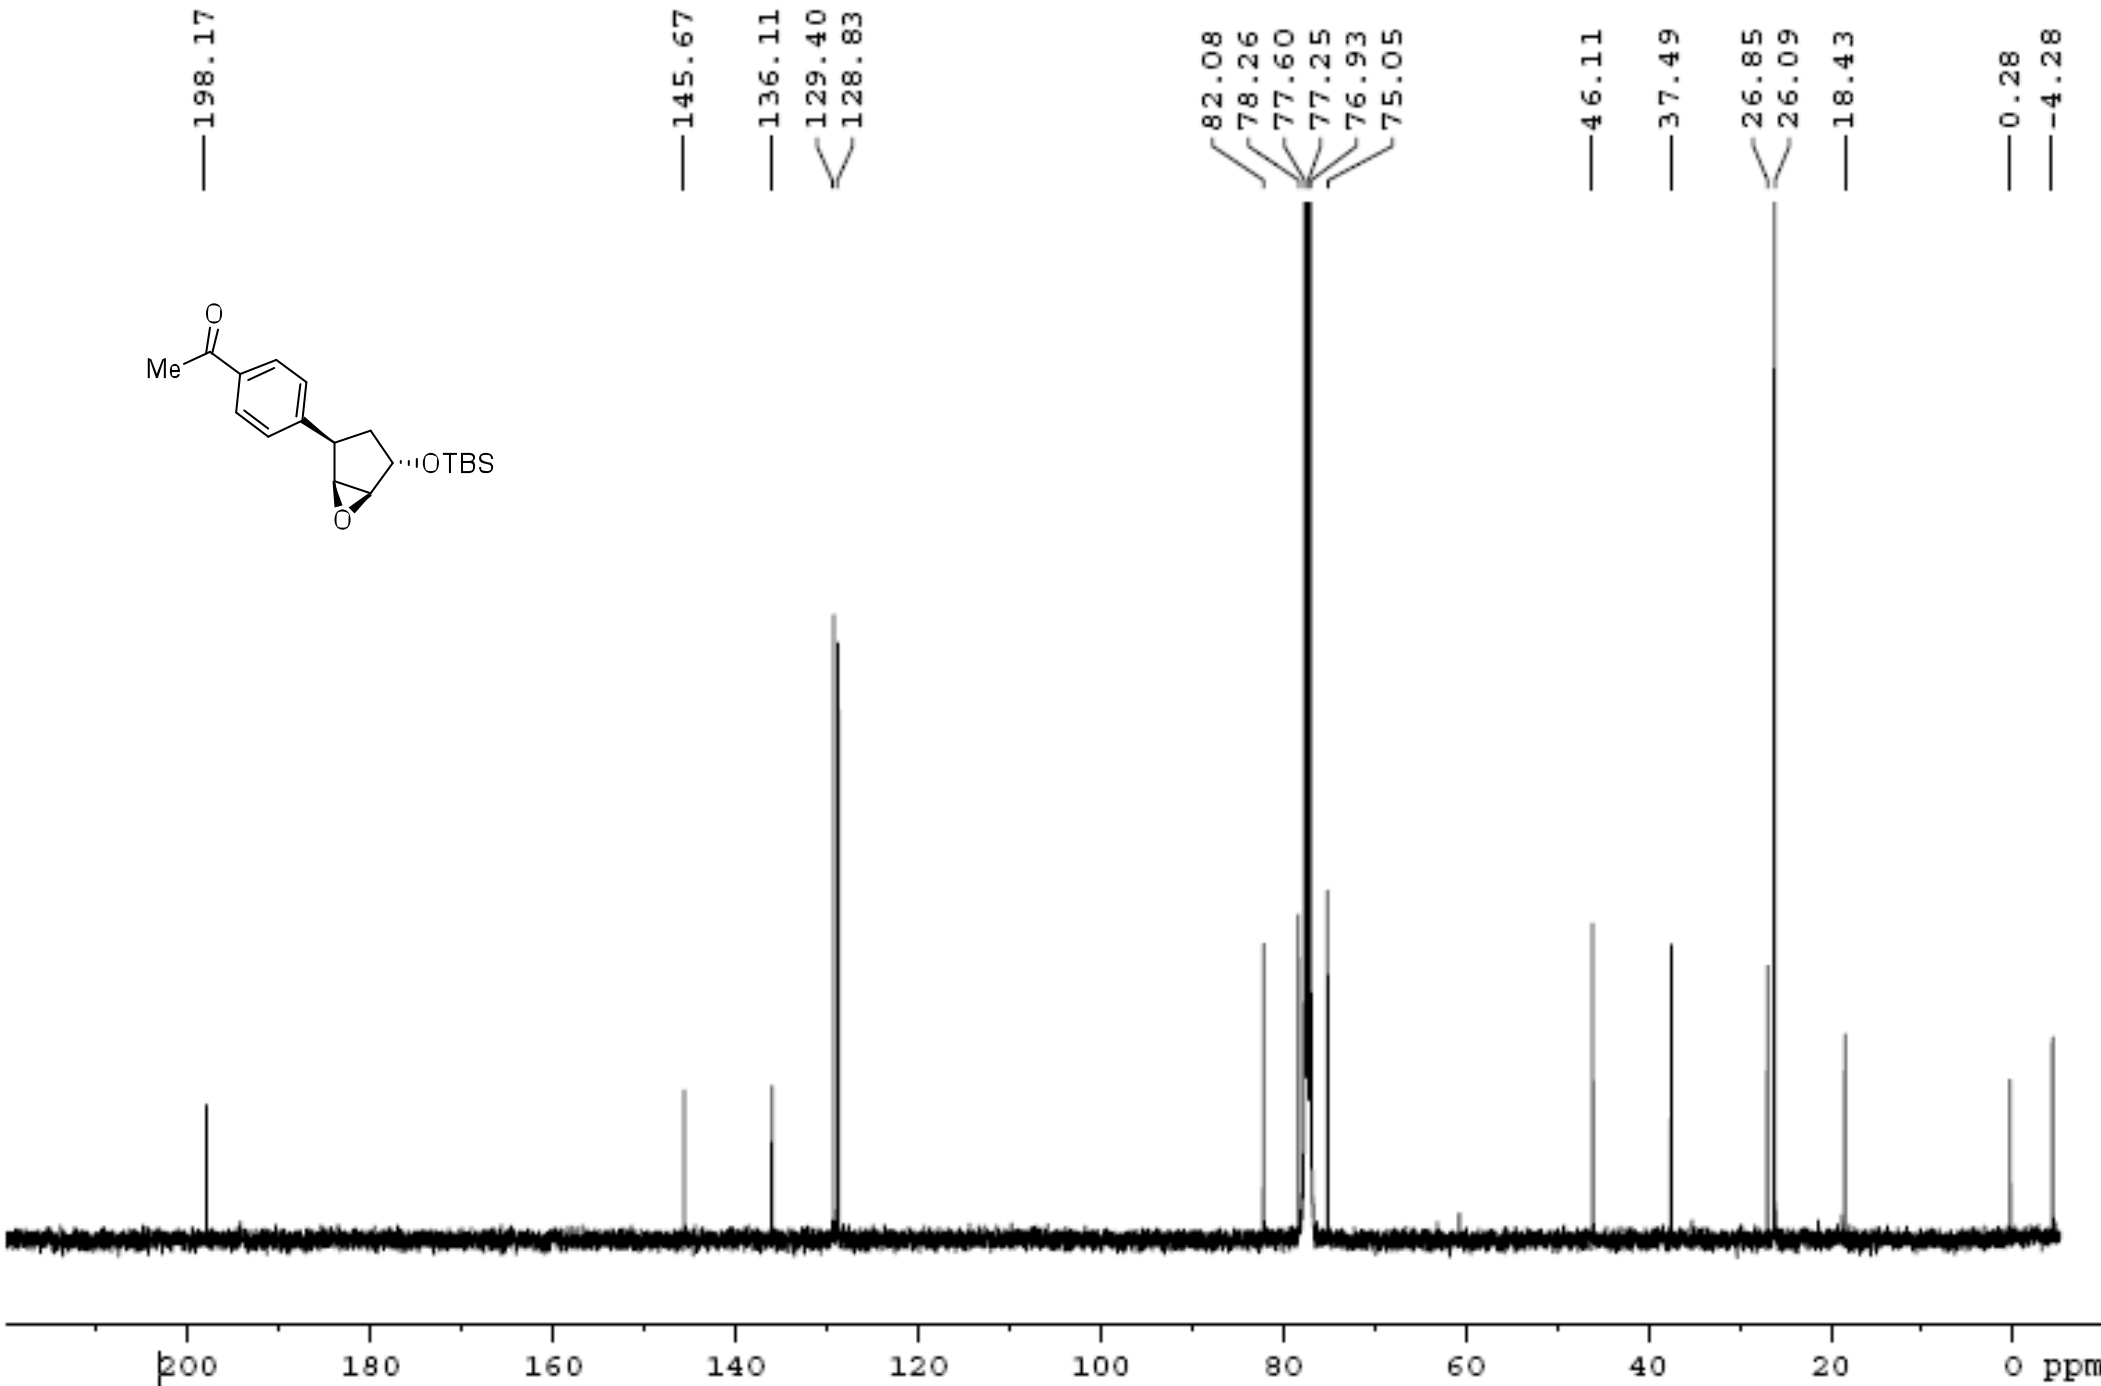

7003noe AV300 23 July 2013

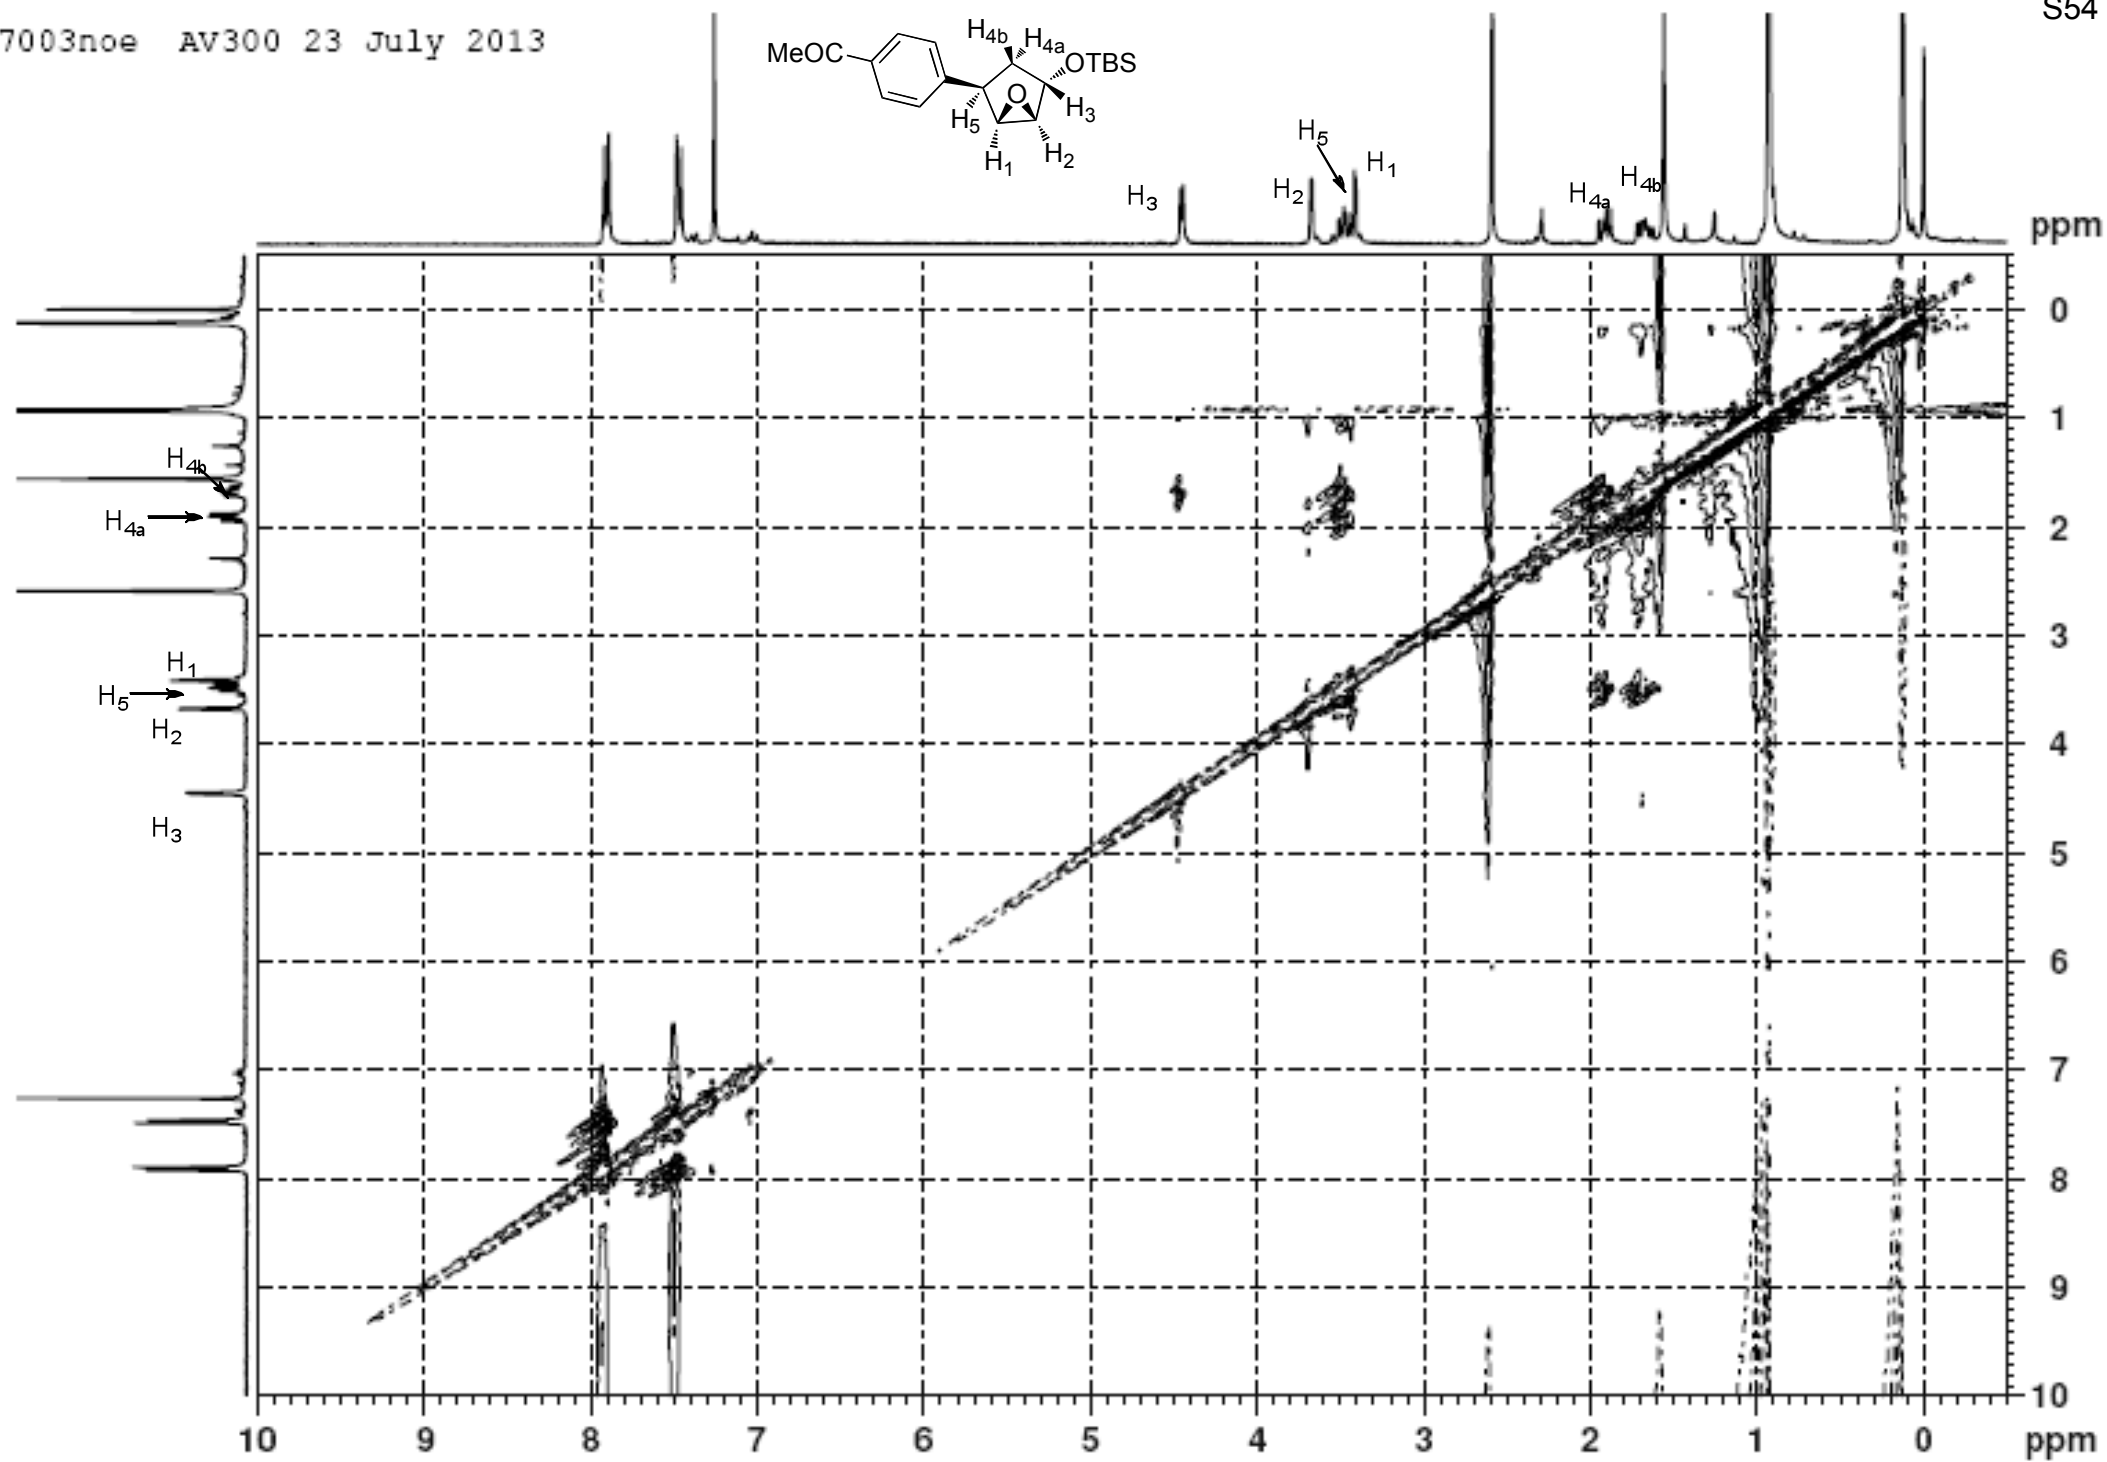

7003noe AV300 23 July 2013

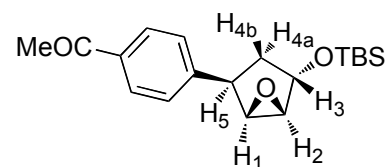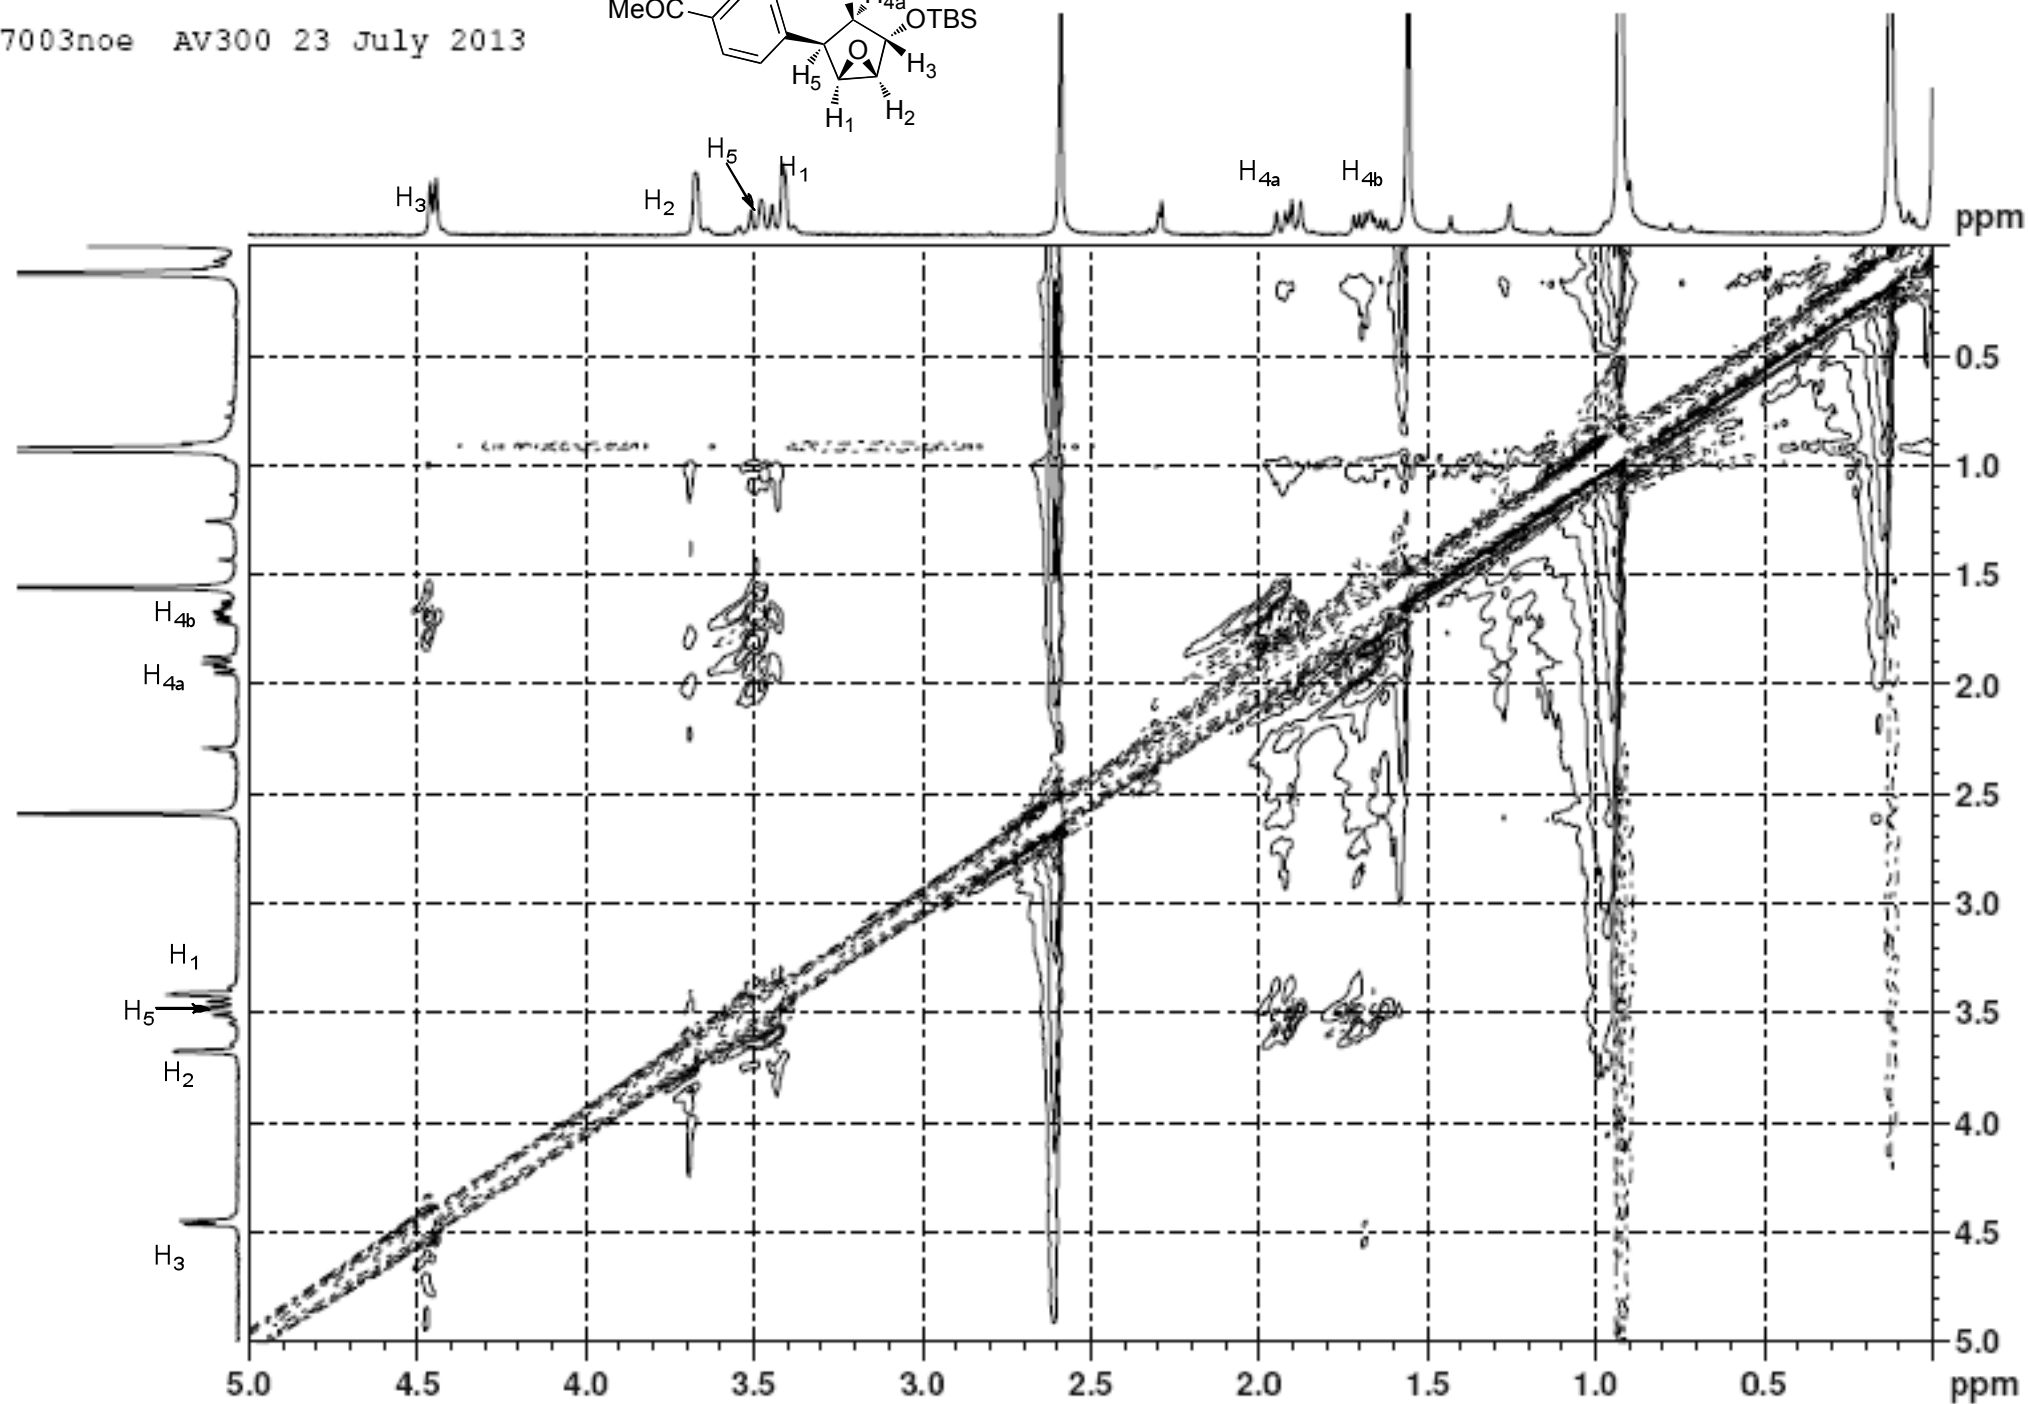

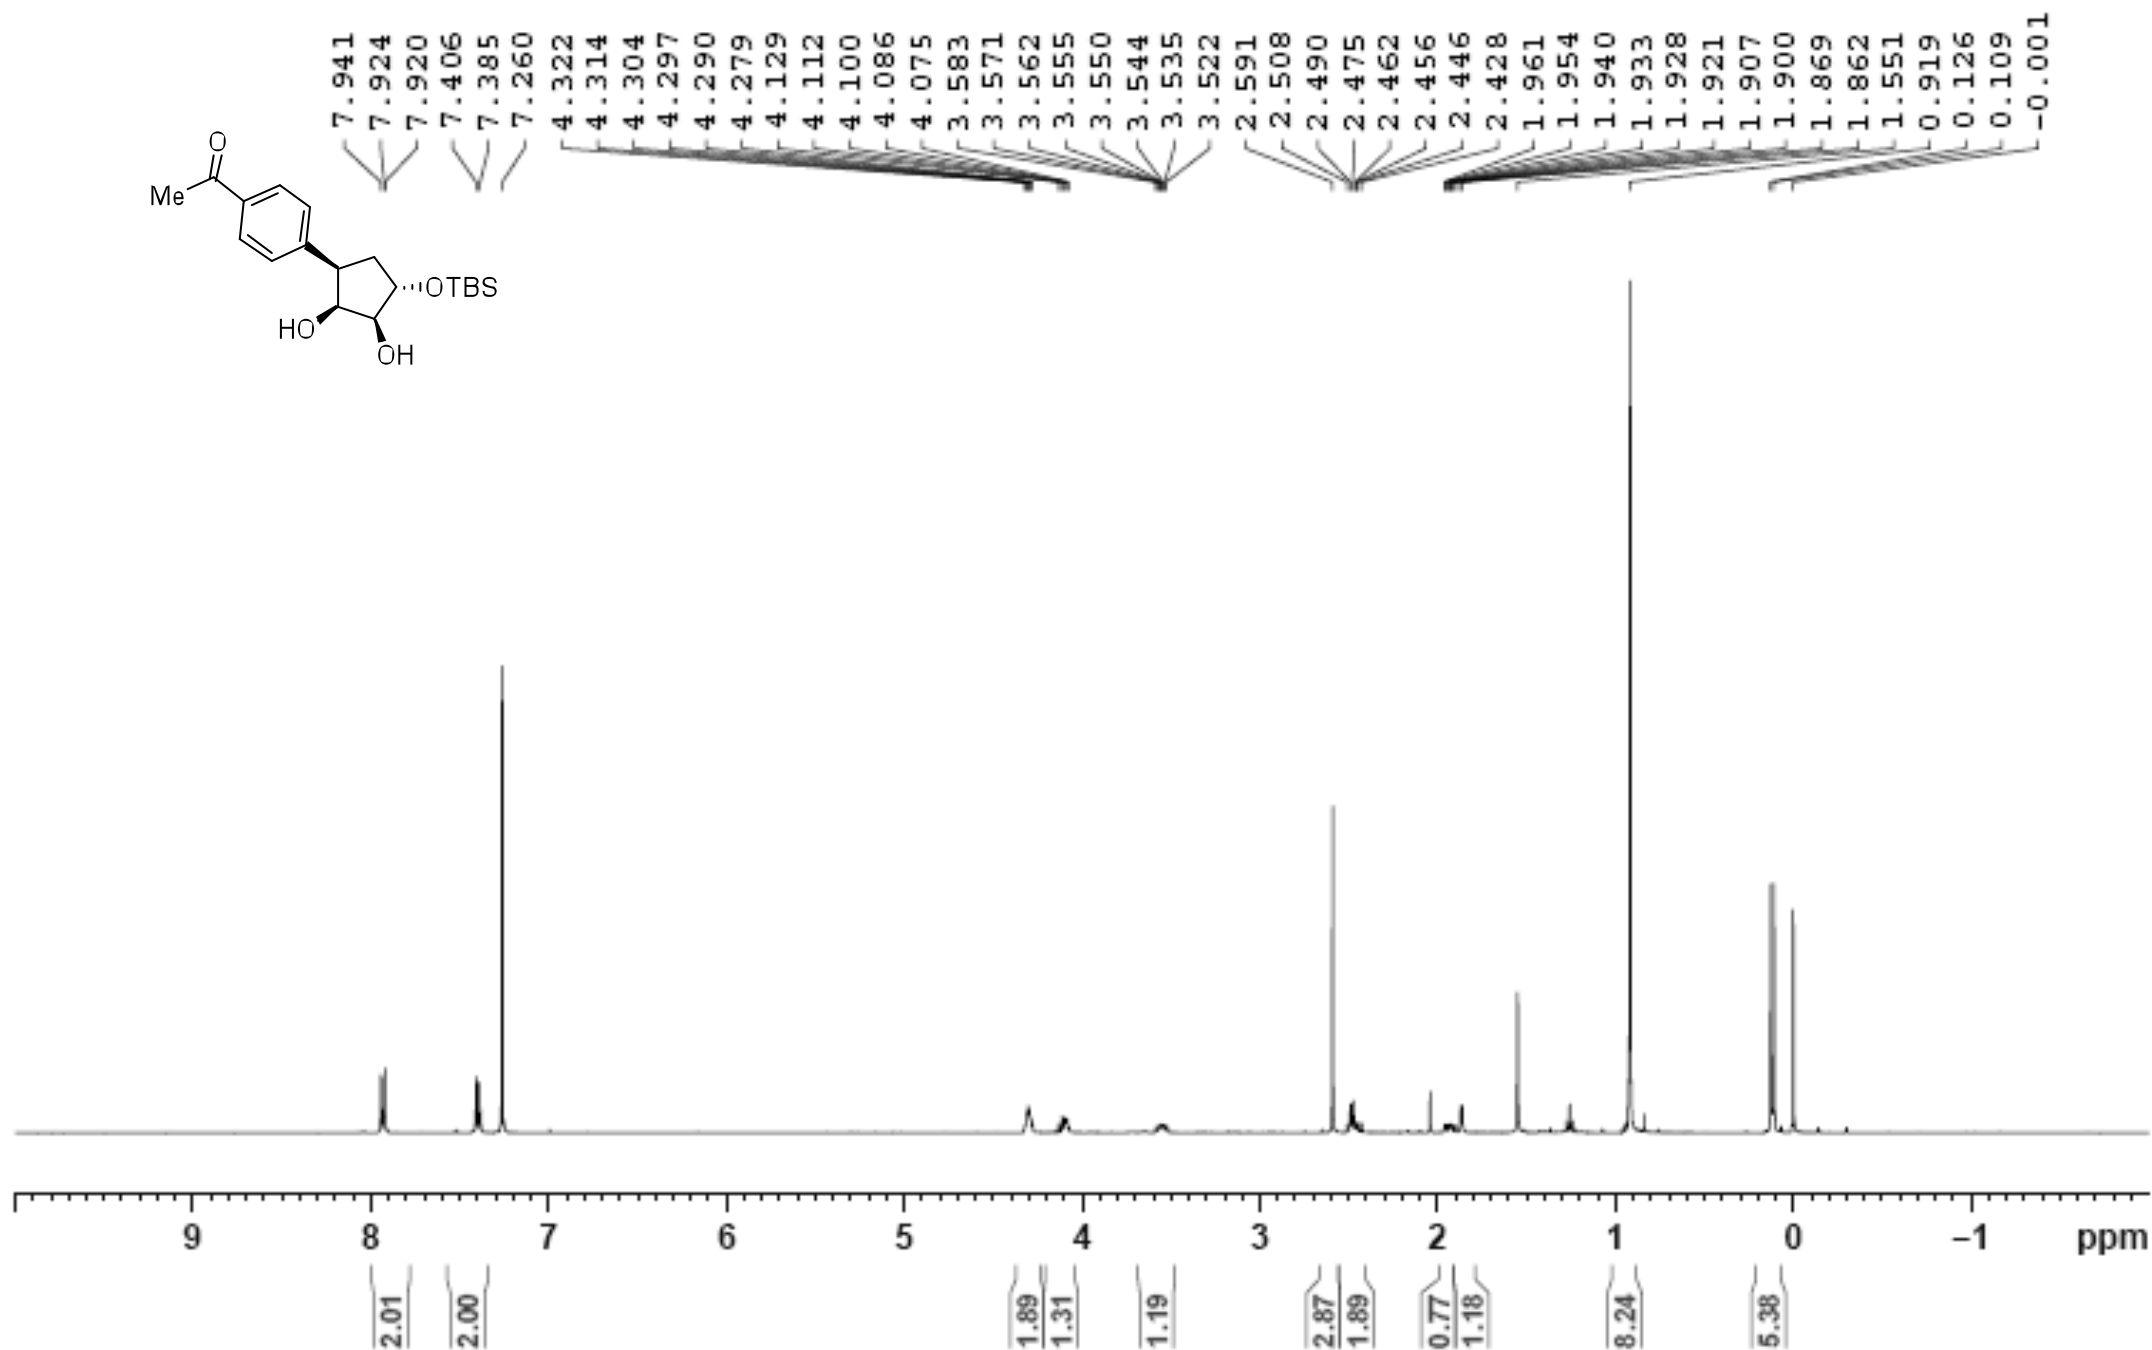



6144-1c BBF01 13 APR 2013

S57

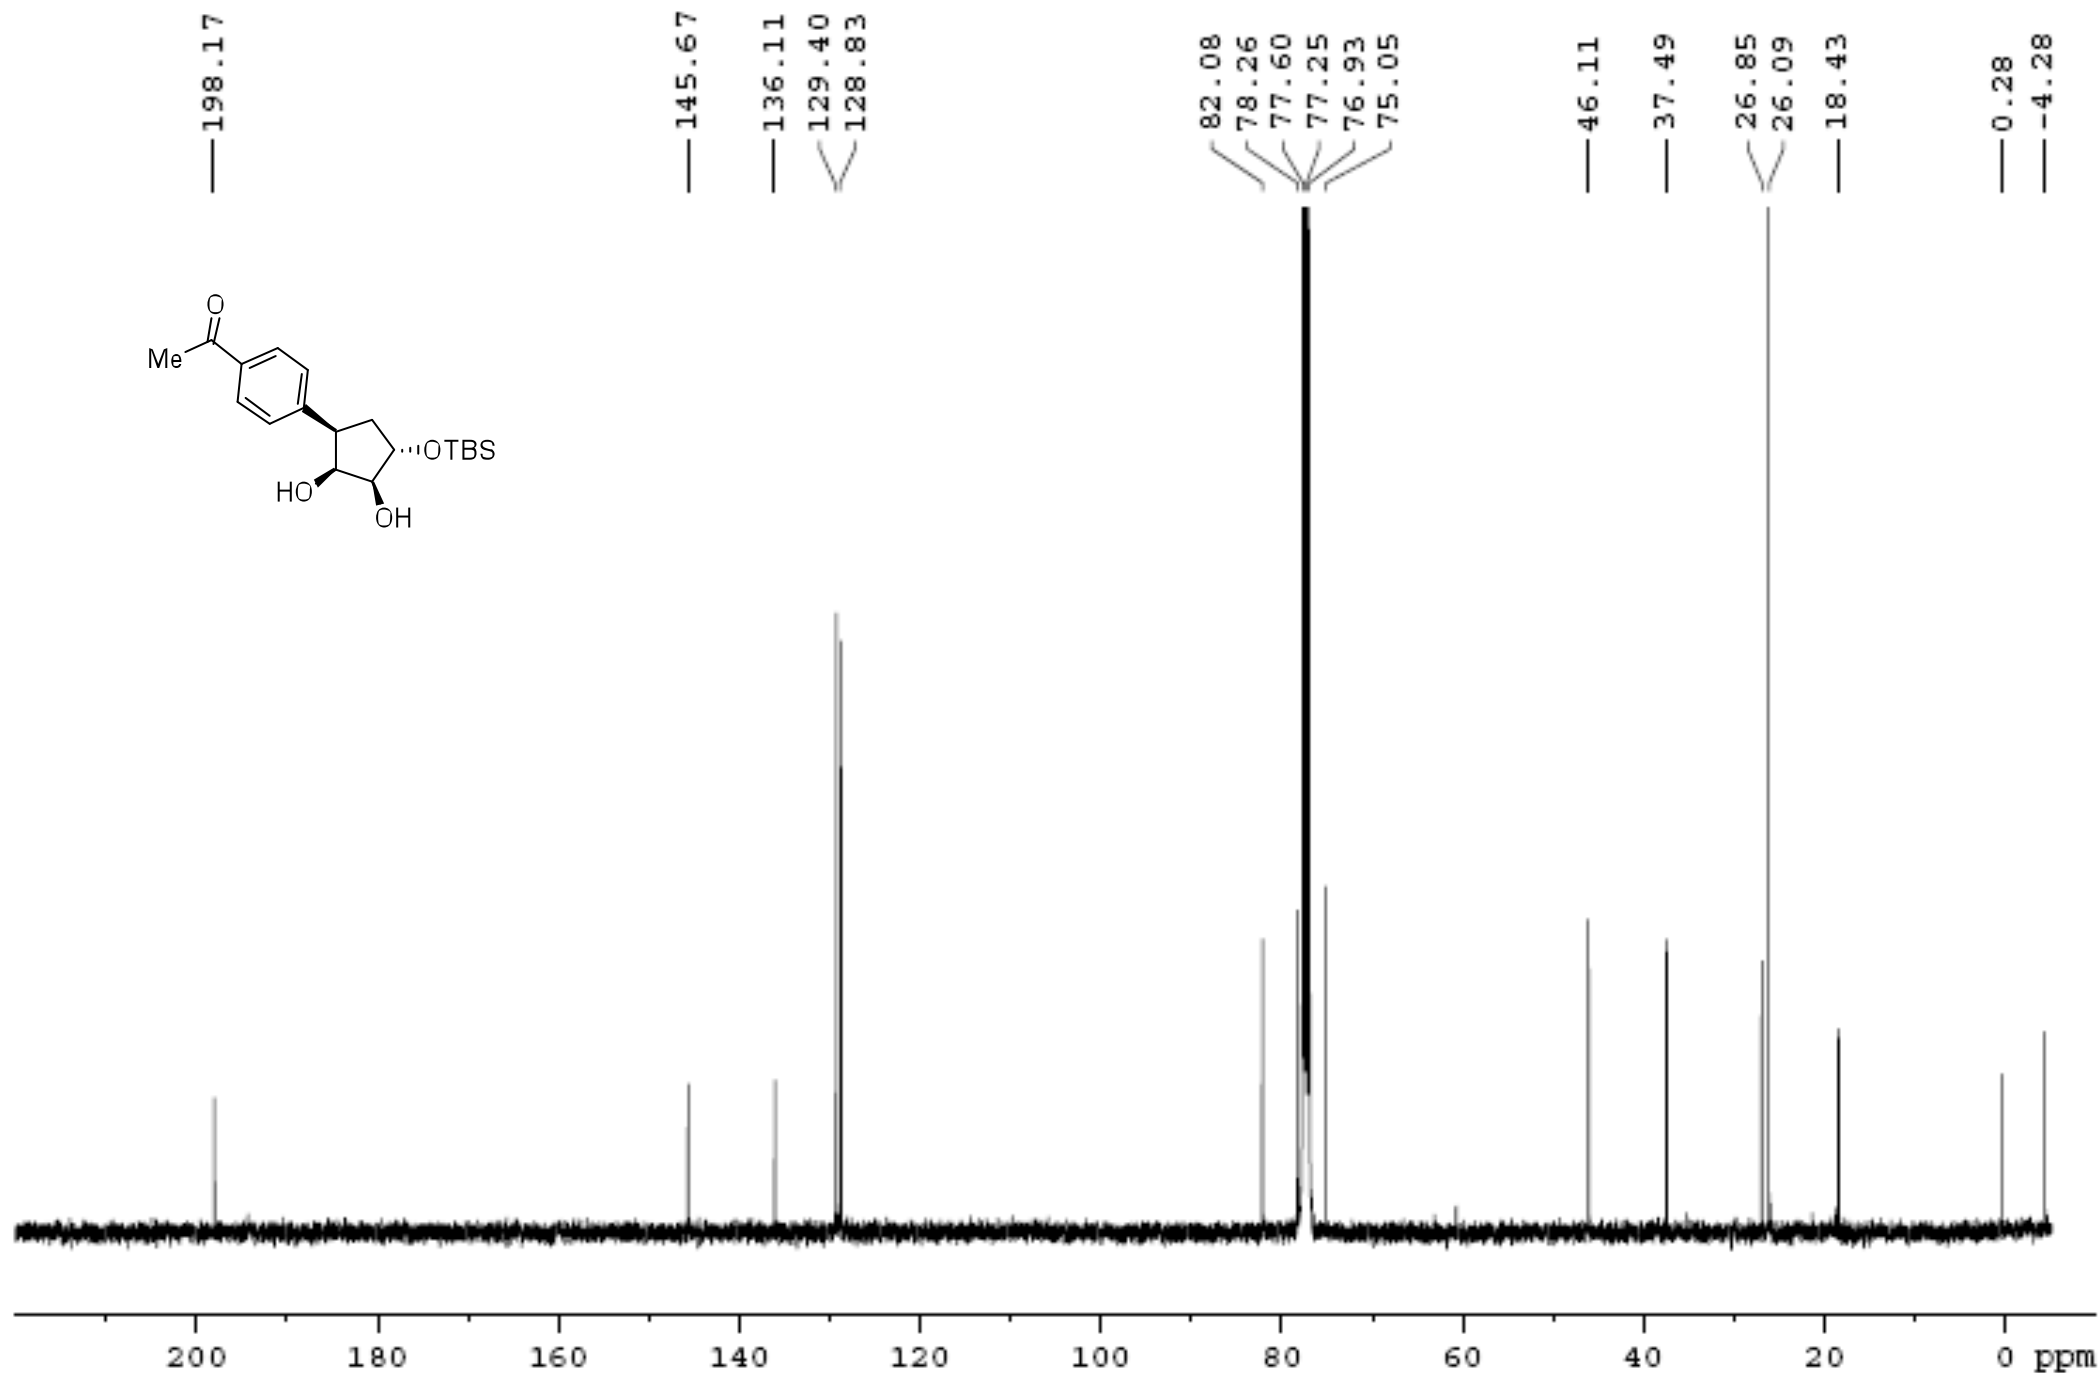

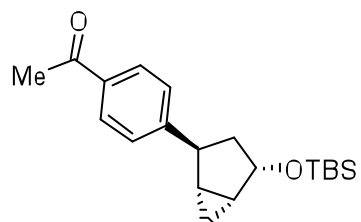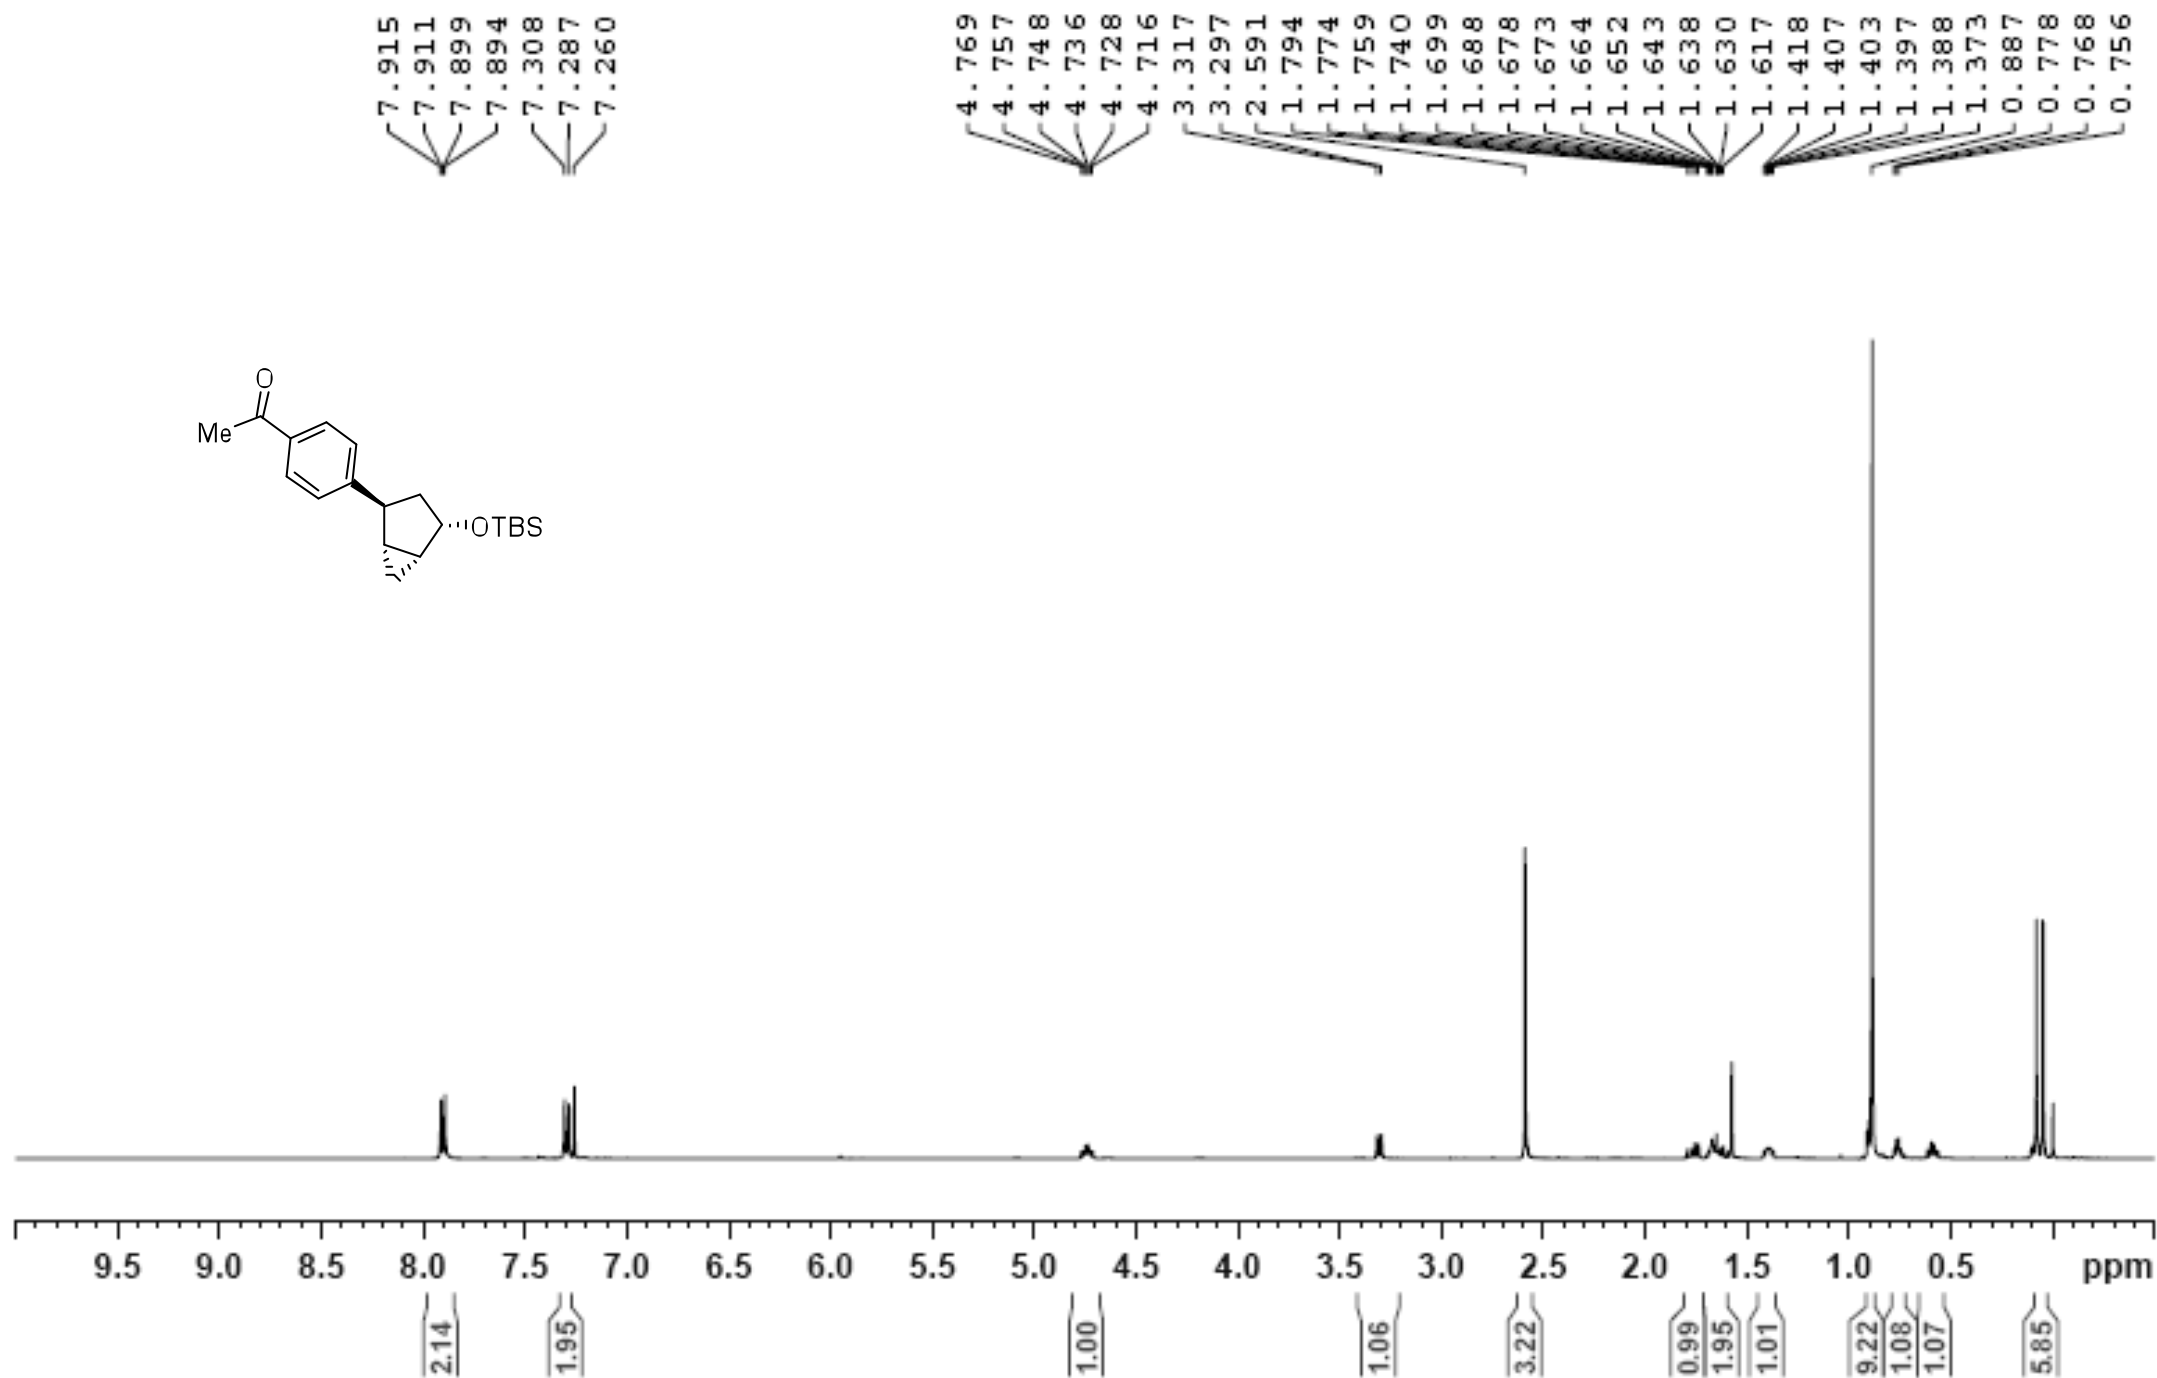

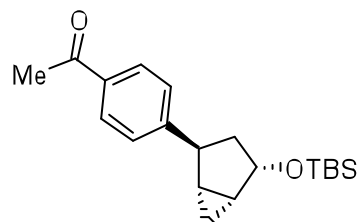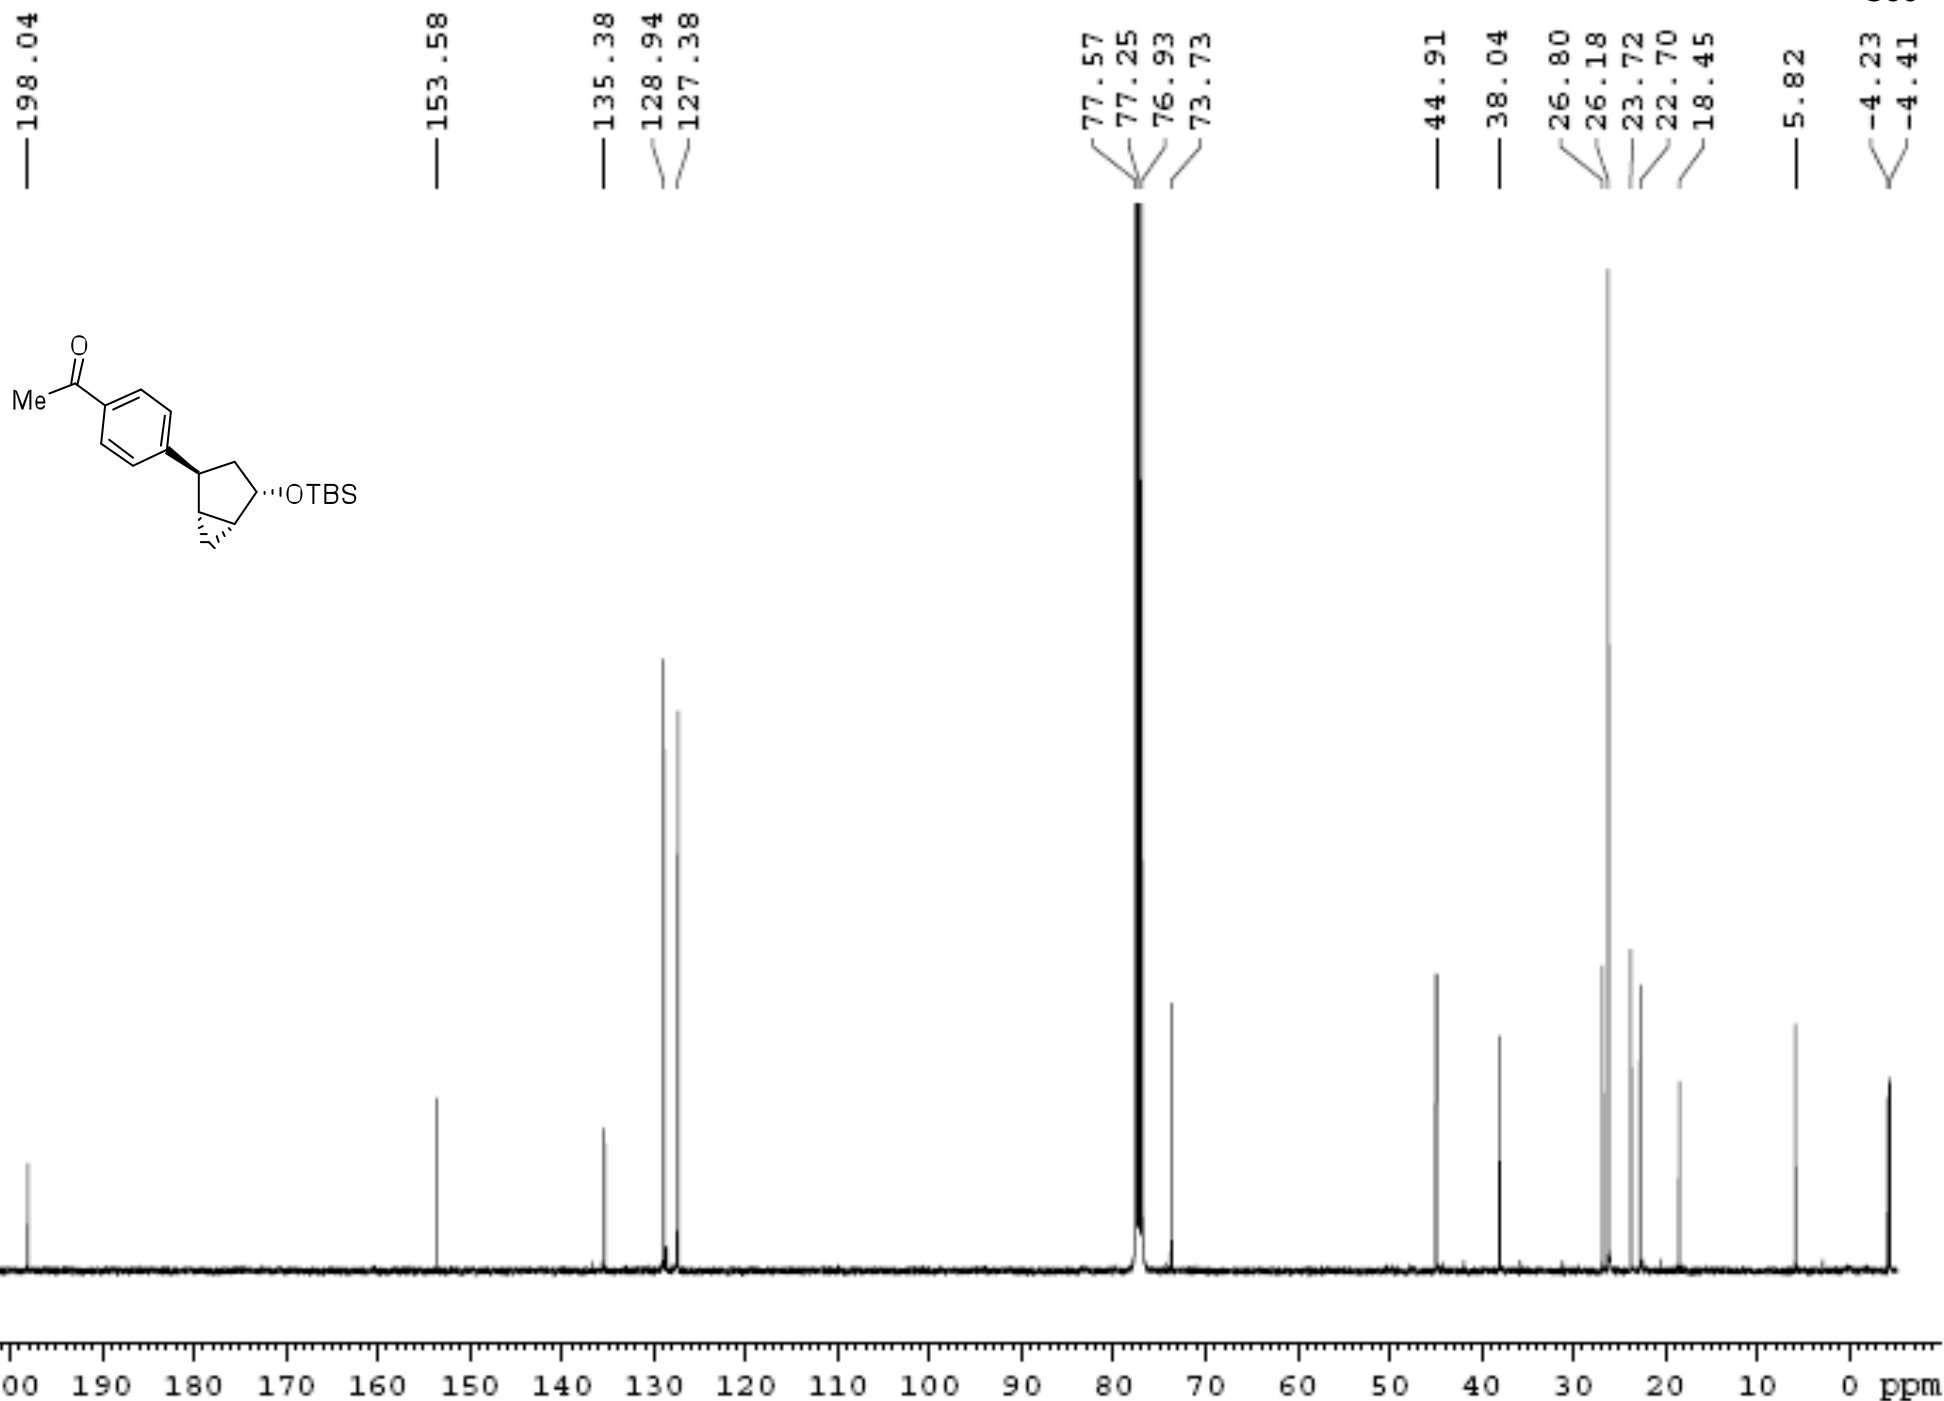

7003noe AV300 23 July 2013

S60

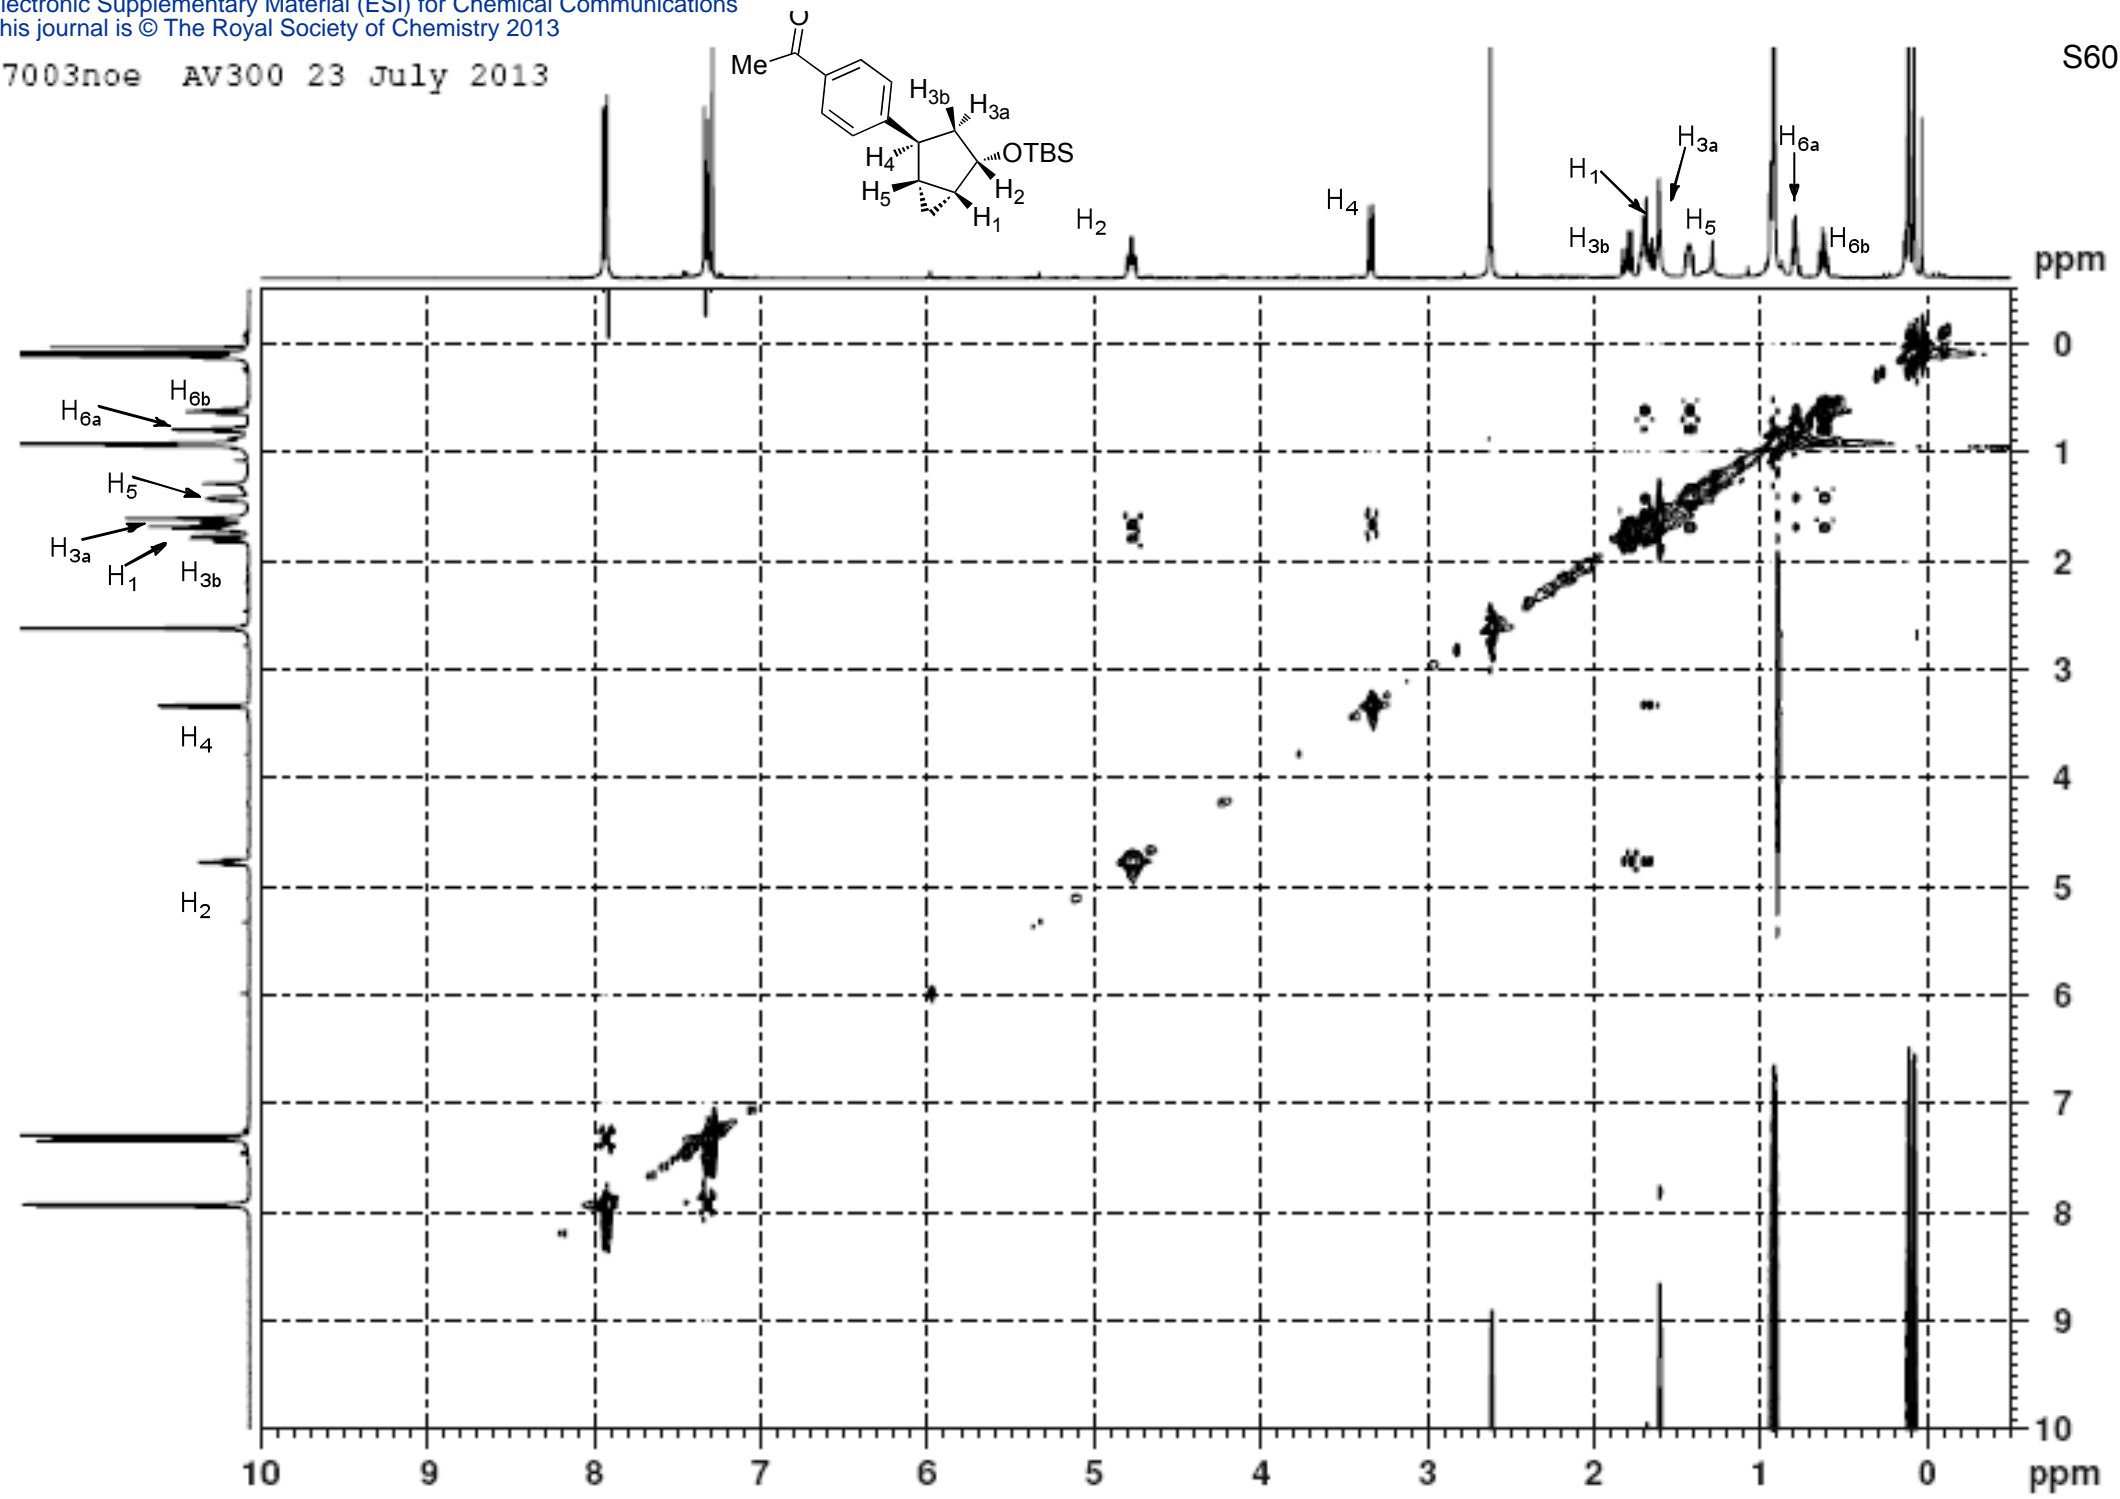

7003hoe AV300 23 July 2013

S61

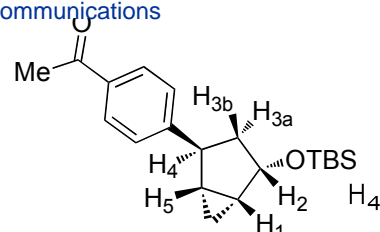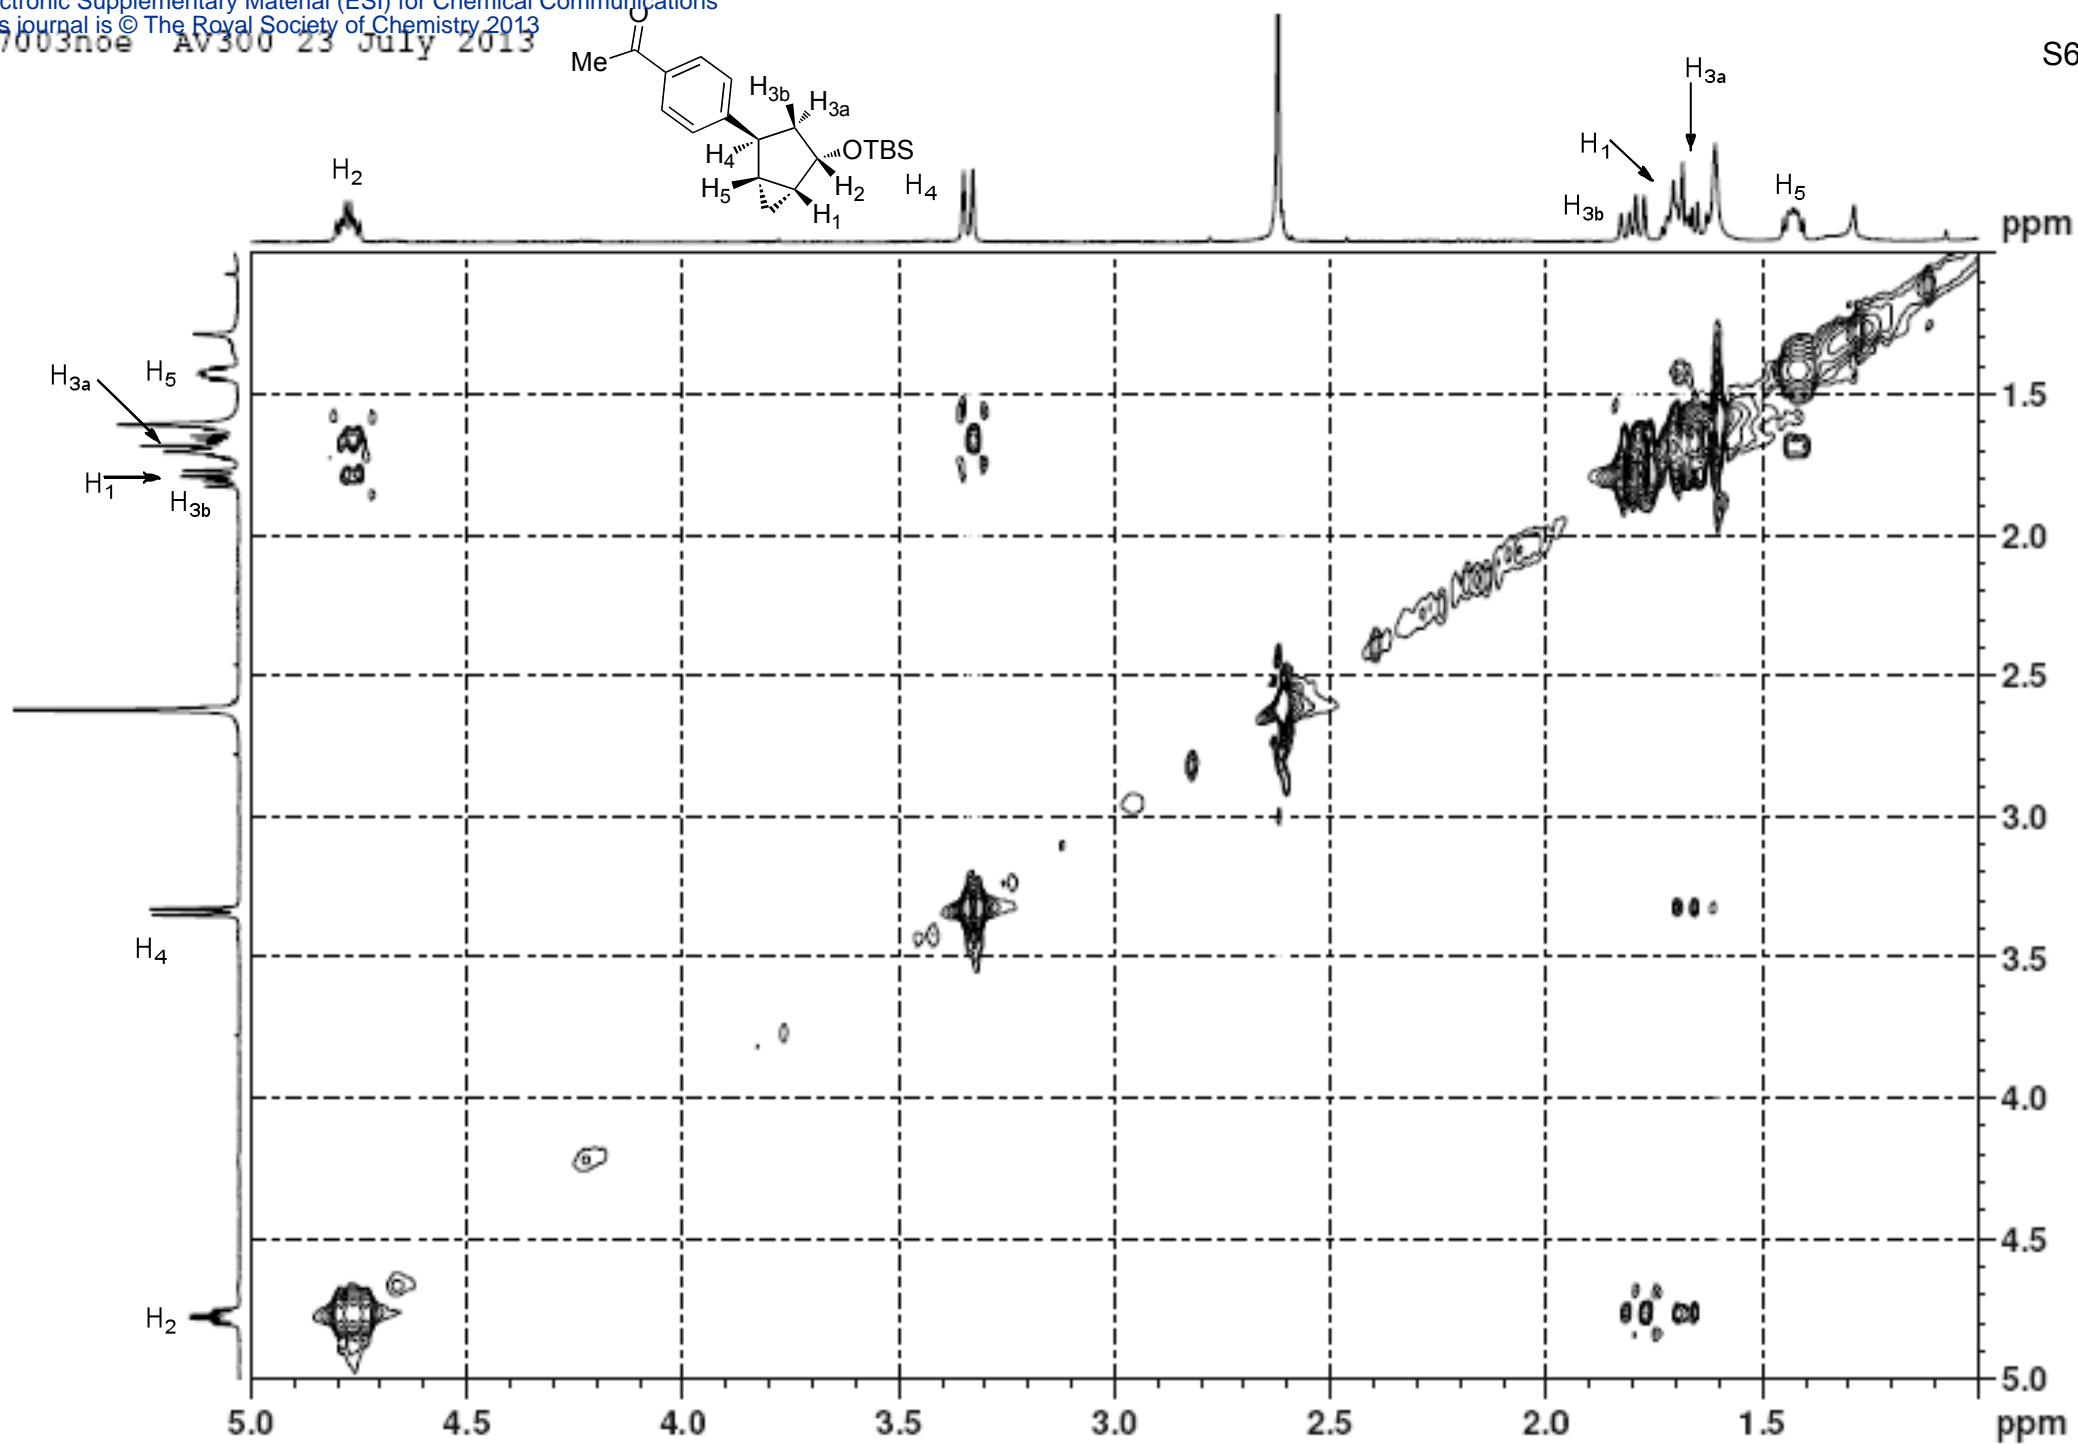

70051mgc RMK, CDCl3 BBFO2  
2013-07-23

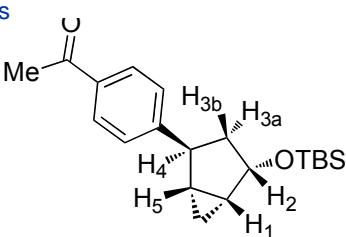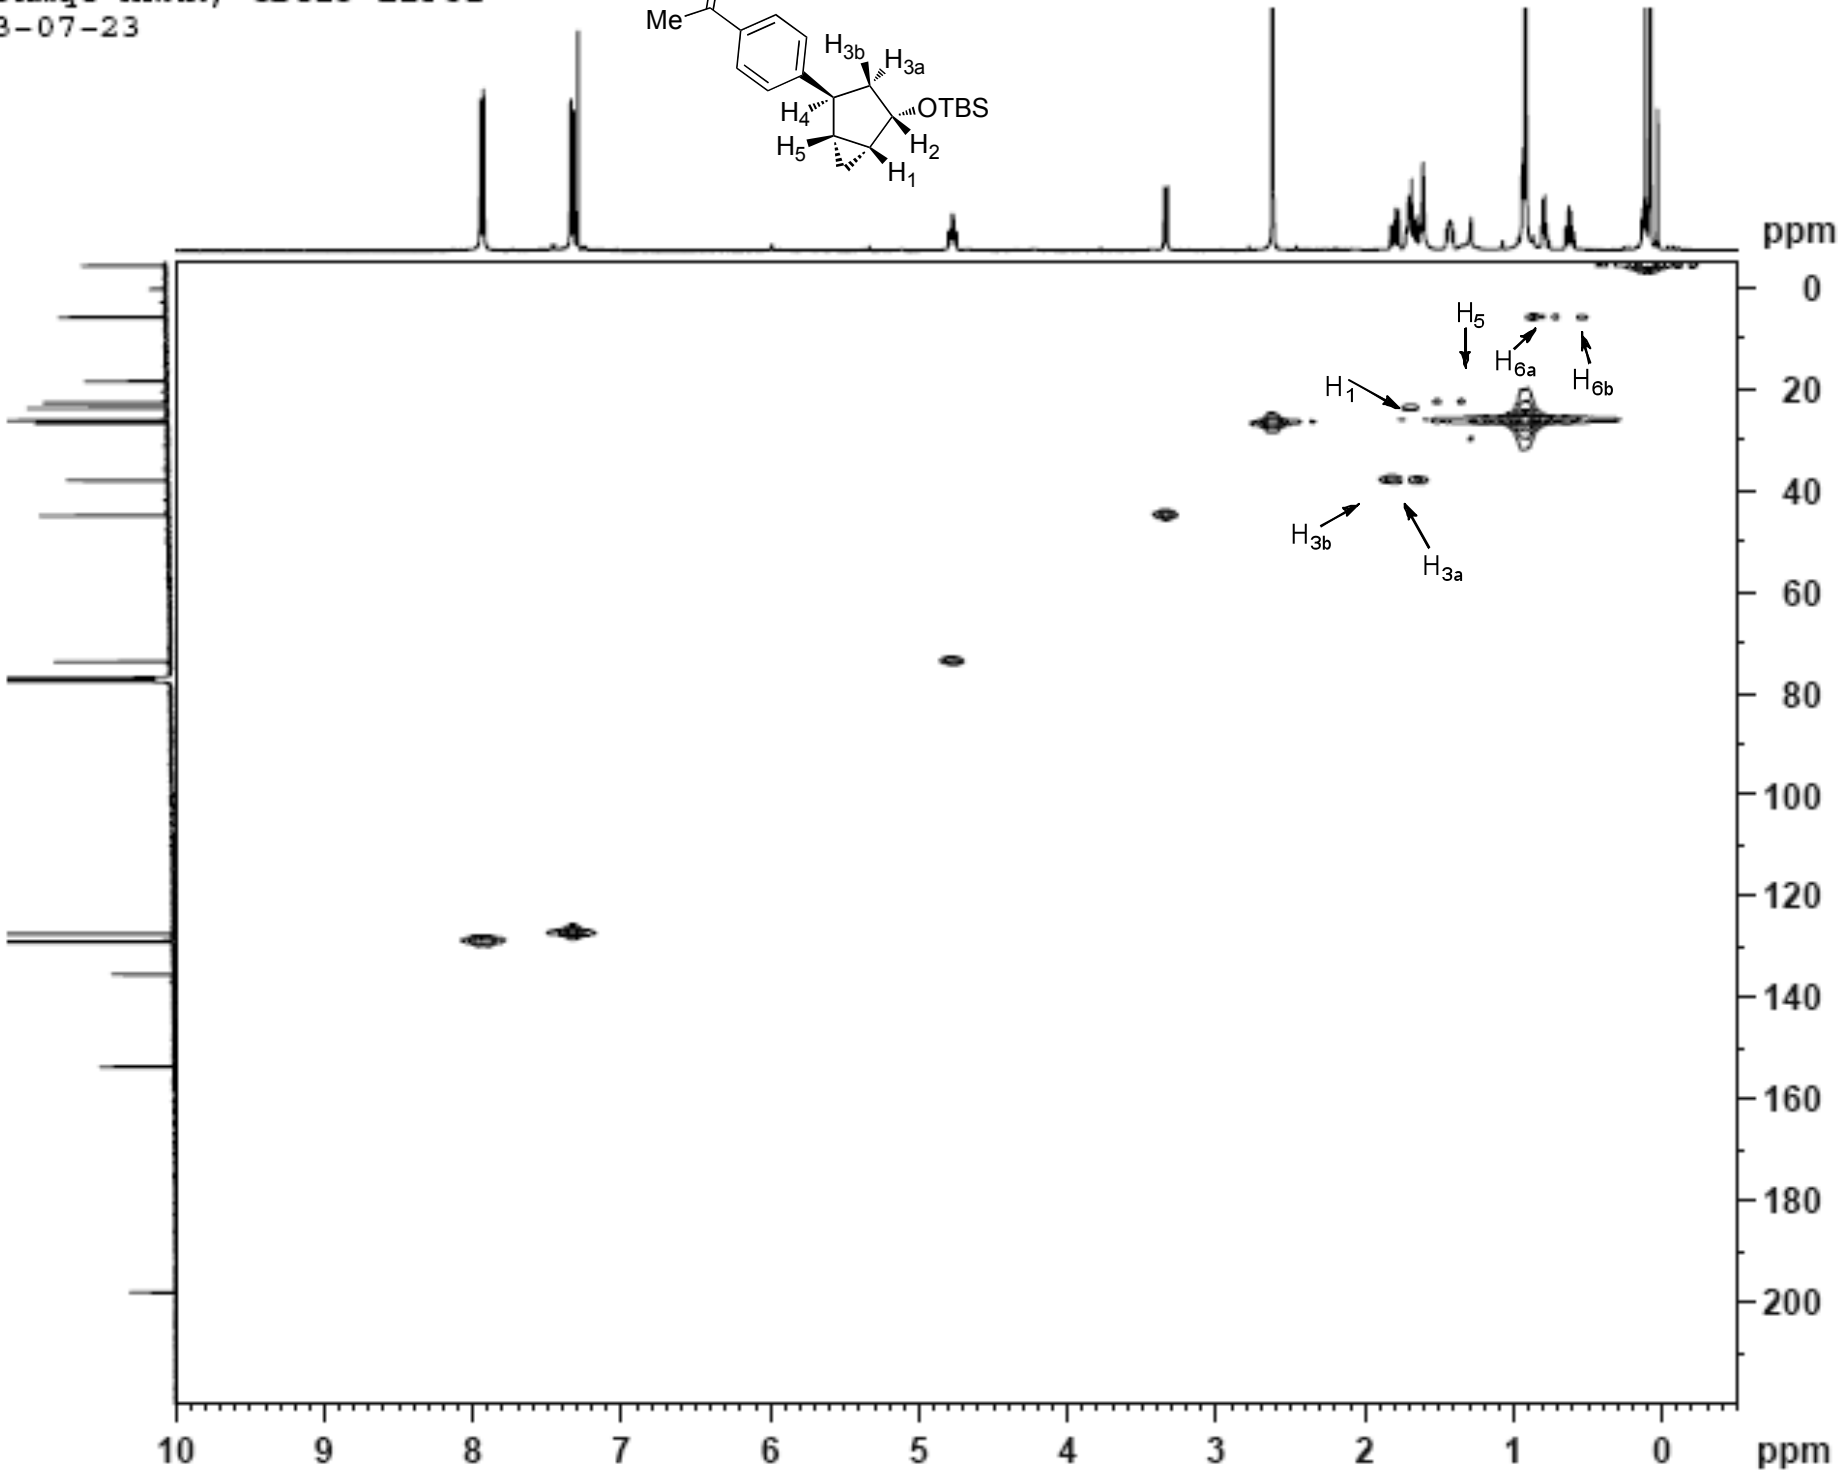

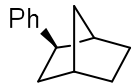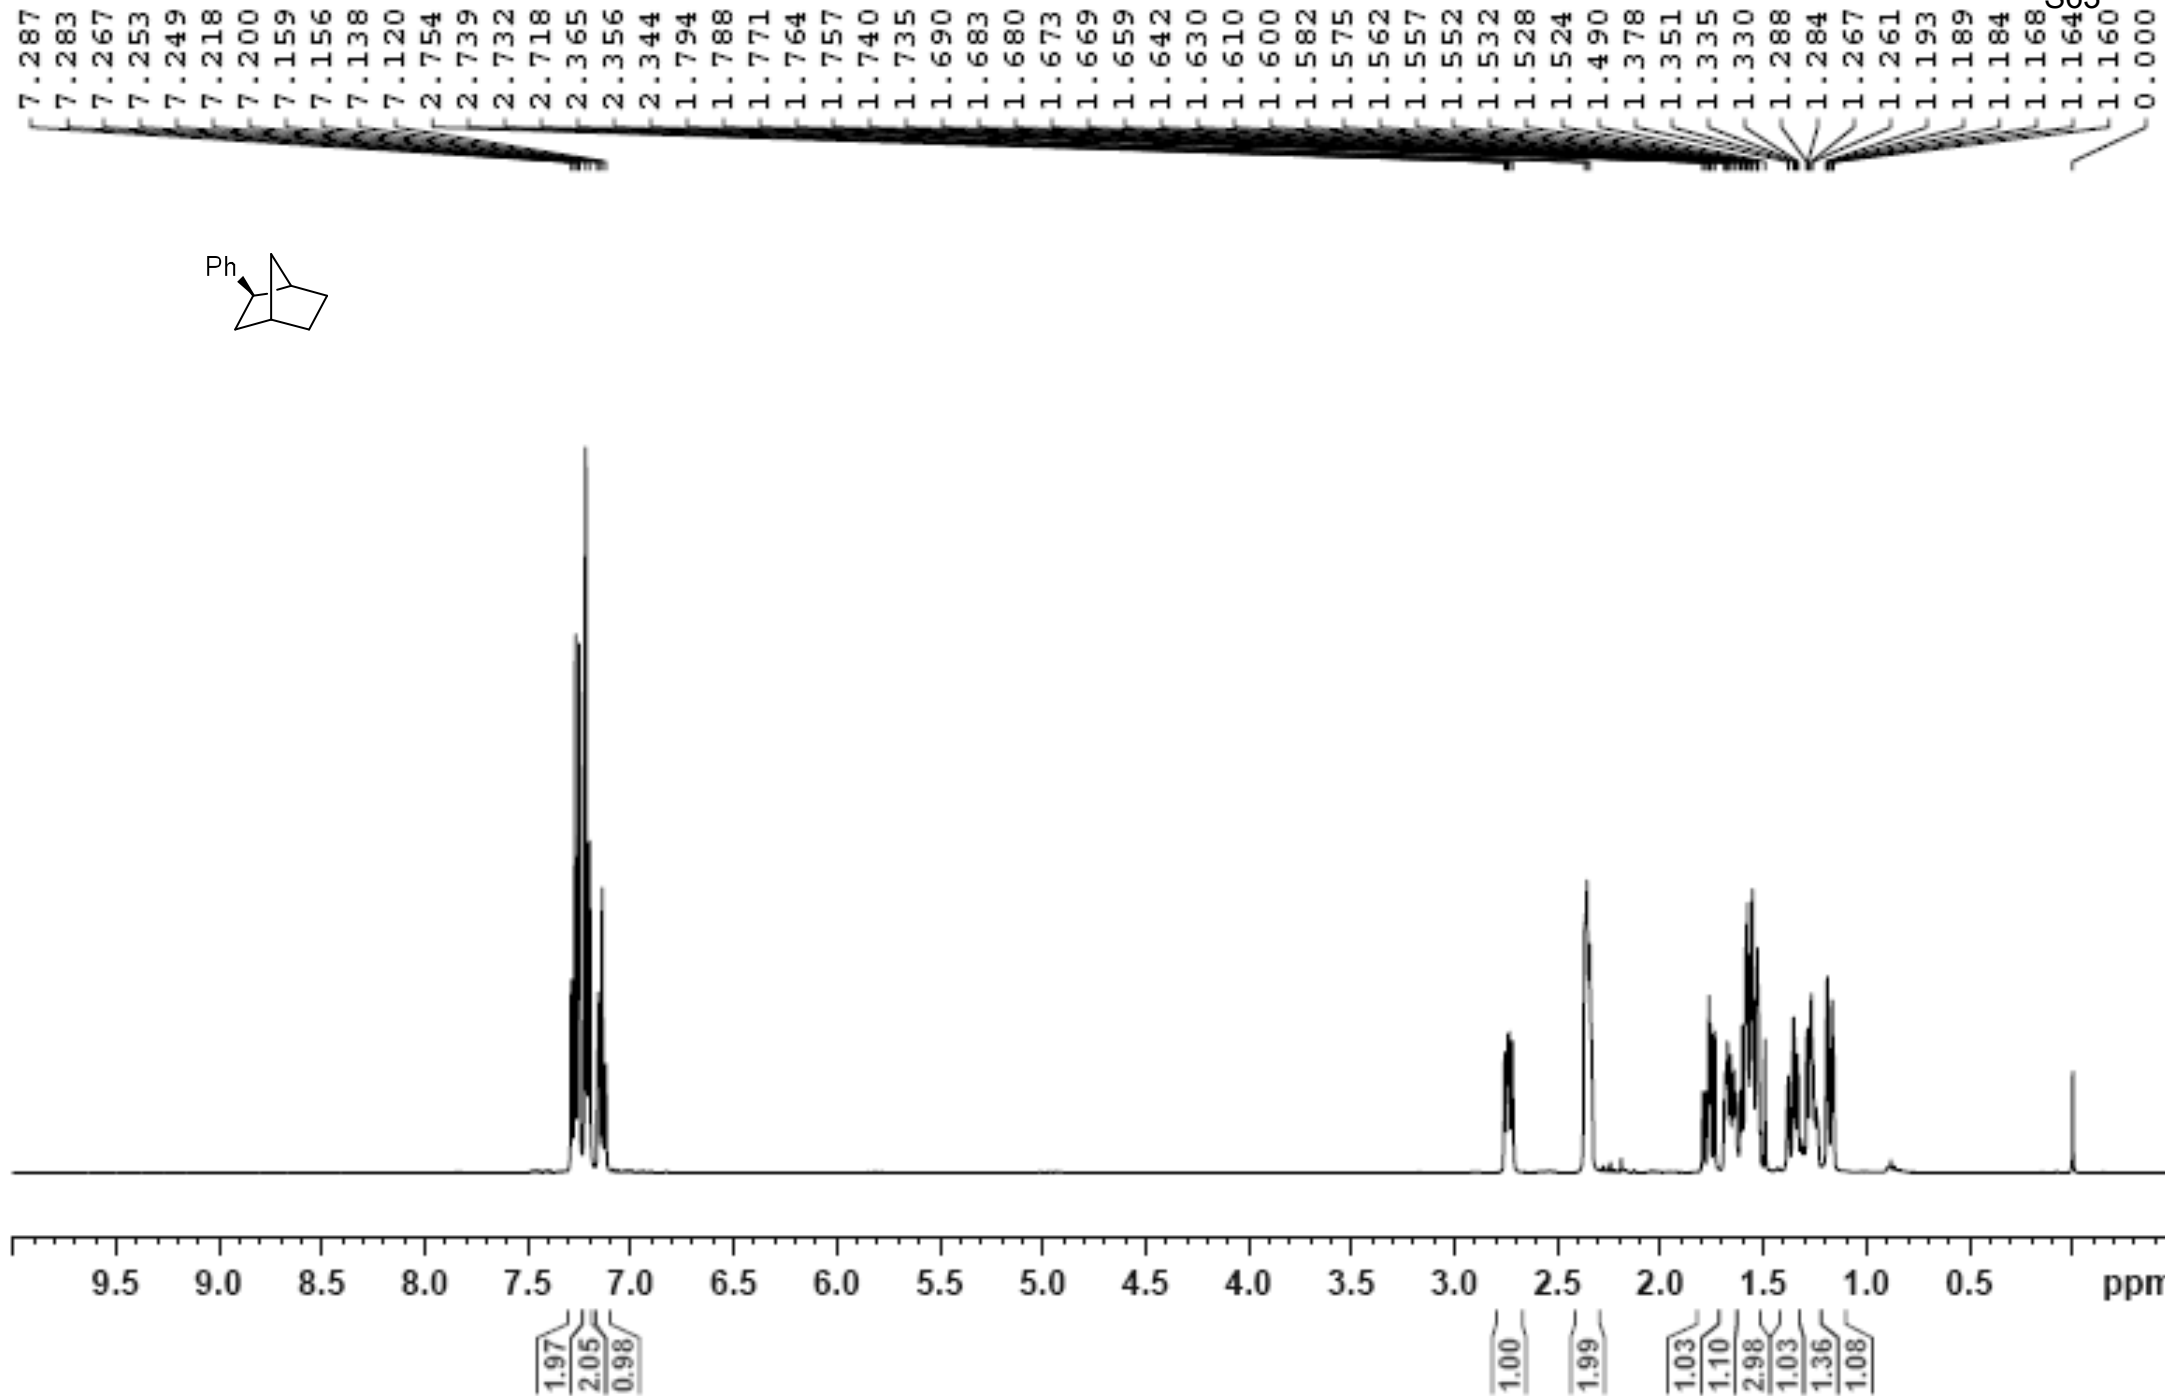

7063 BBFO1 16JUN13

S64

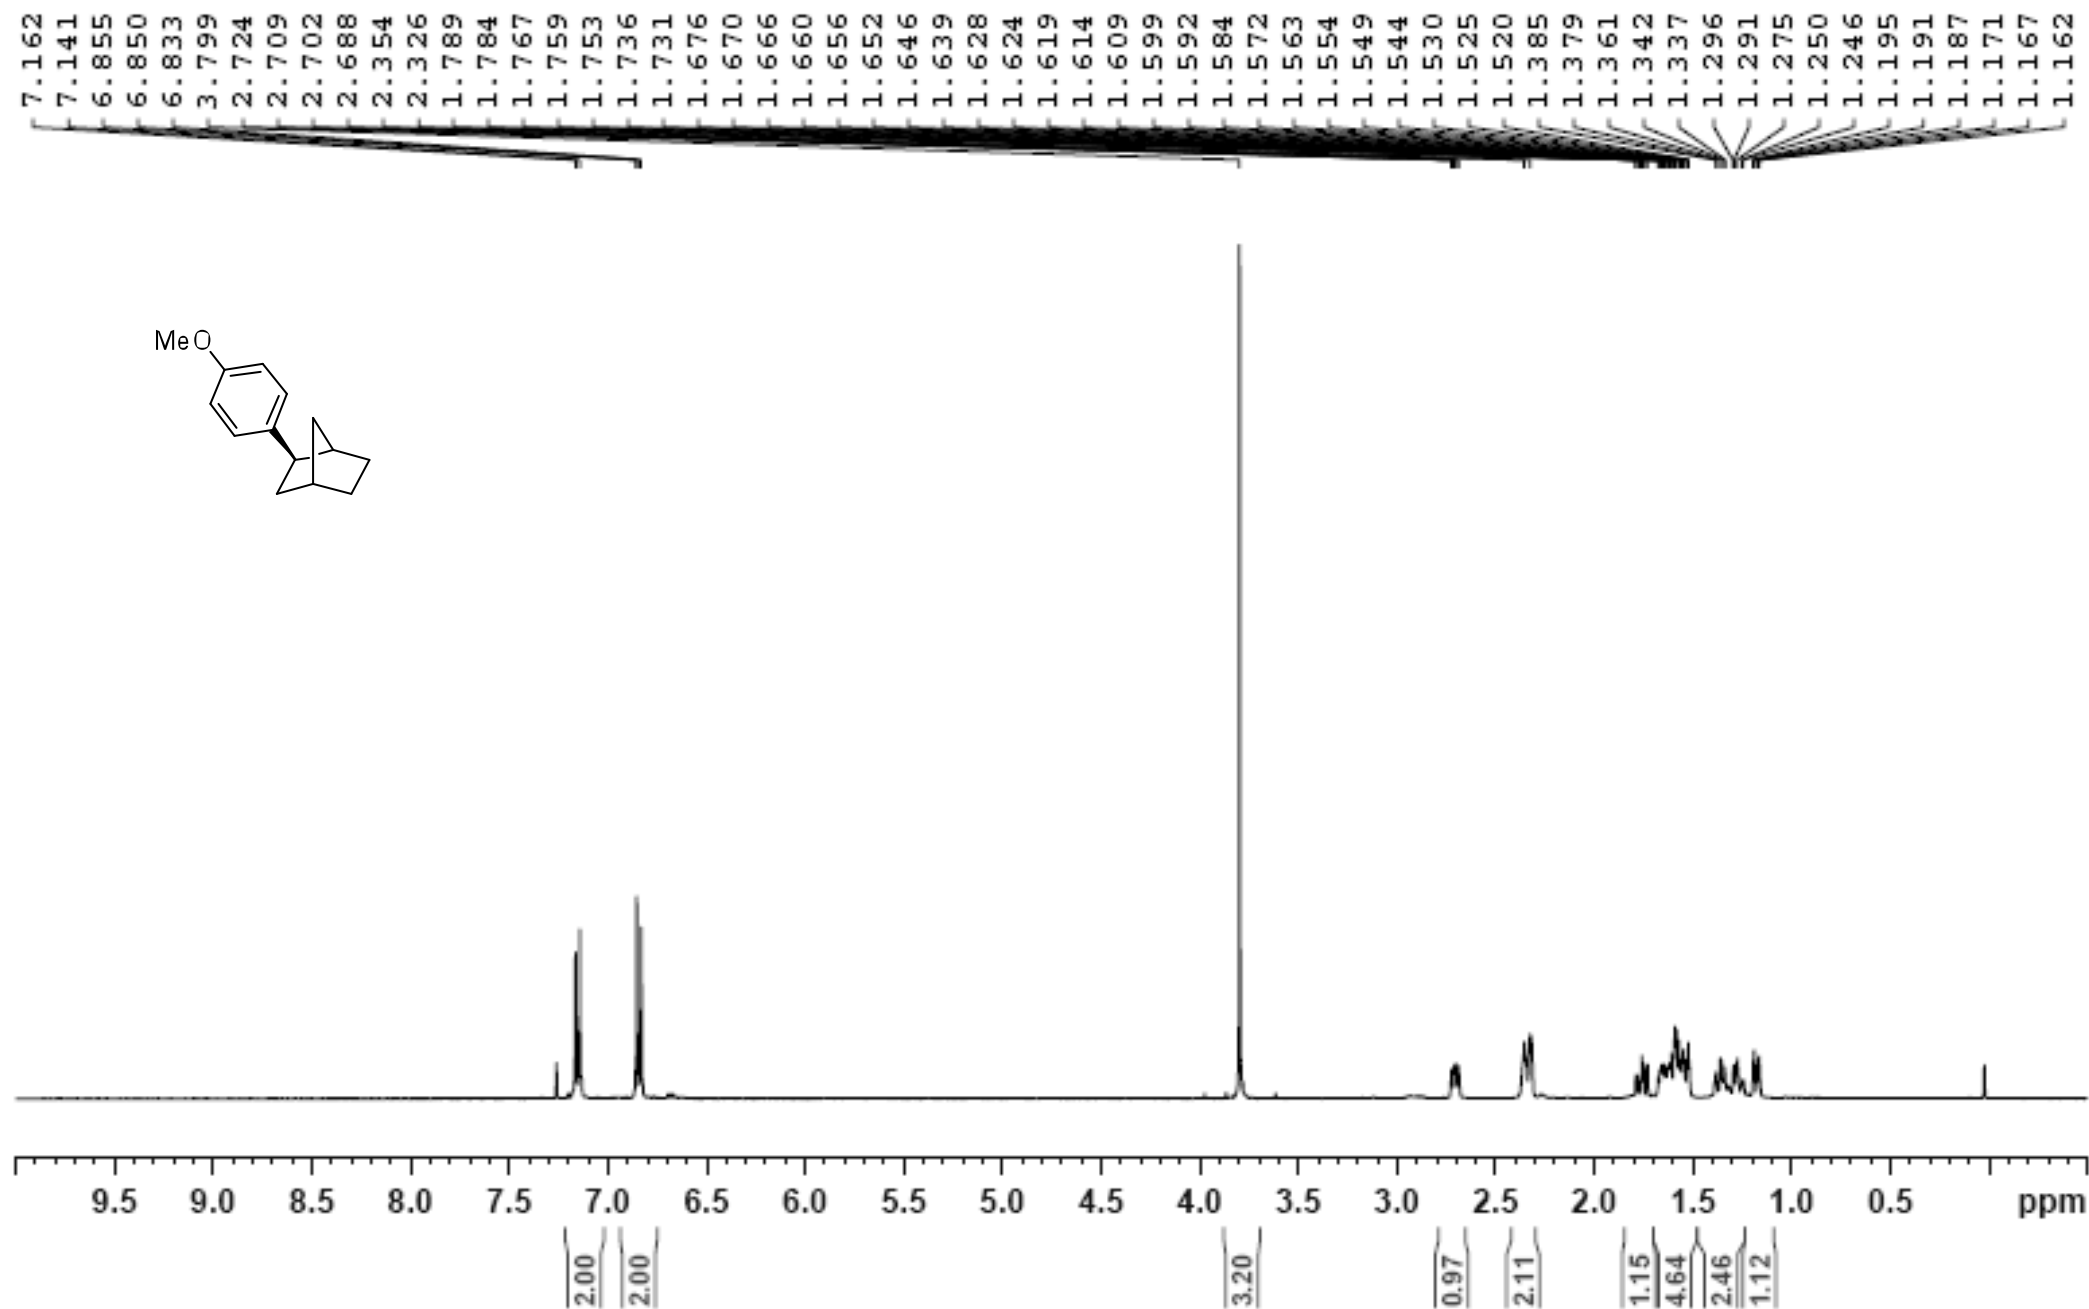



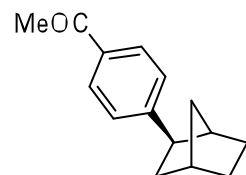

7.888  
7.861  
7.311  
7.284  
7.261

2.816  
2.799  
2.788  
2.765  
2.575  
2.388  
1.850  
1.840  
1.817  
1.808  
1.800  
1.777  
1.767  
1.685  
1.677  
1.663  
1.656  
1.645  
1.630  
1.620  
1.604  
1.585  
1.571  
1.566  
1.537  
1.531  
1.504  
1.493  
1.417  
1.406  
1.396  
1.378

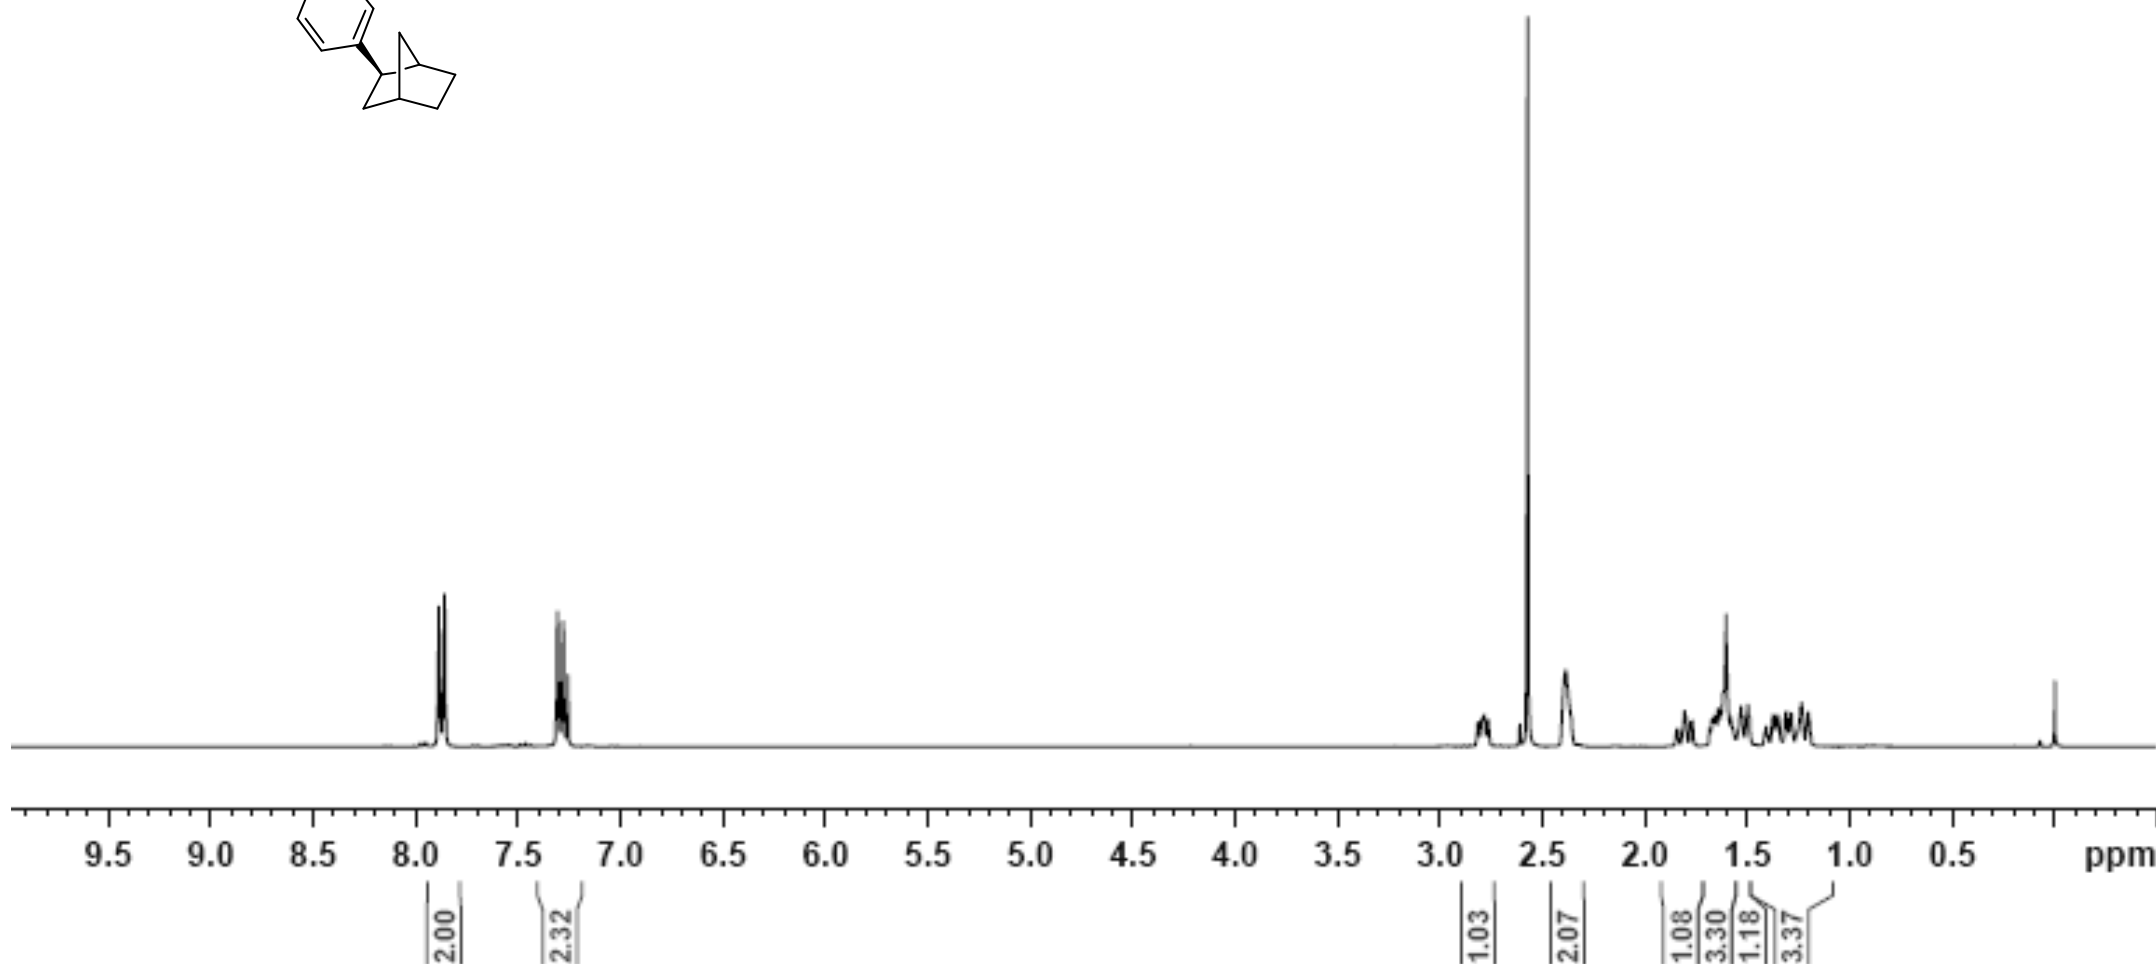

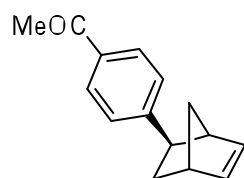

7.906  
7.901  
7.897  
7.885  
7.880  
7.875  
7.371  
7.350  
7.260  
6.274  
6.266  
6.260  
6.252  
6.199  
6.192  
6.185  
6.178

2.995  
2.936  
2.933  
2.777  
2.764  
2.755  
2.743  
2.586  
1.749  
1.741  
1.732  
1.724  
1.720  
1.711  
1.702  
1.698  
1.680  
1.675  
1.583  
1.564  
1.543  
1.475  
1.471  
1.466  
1.462  
1.454  
1.449

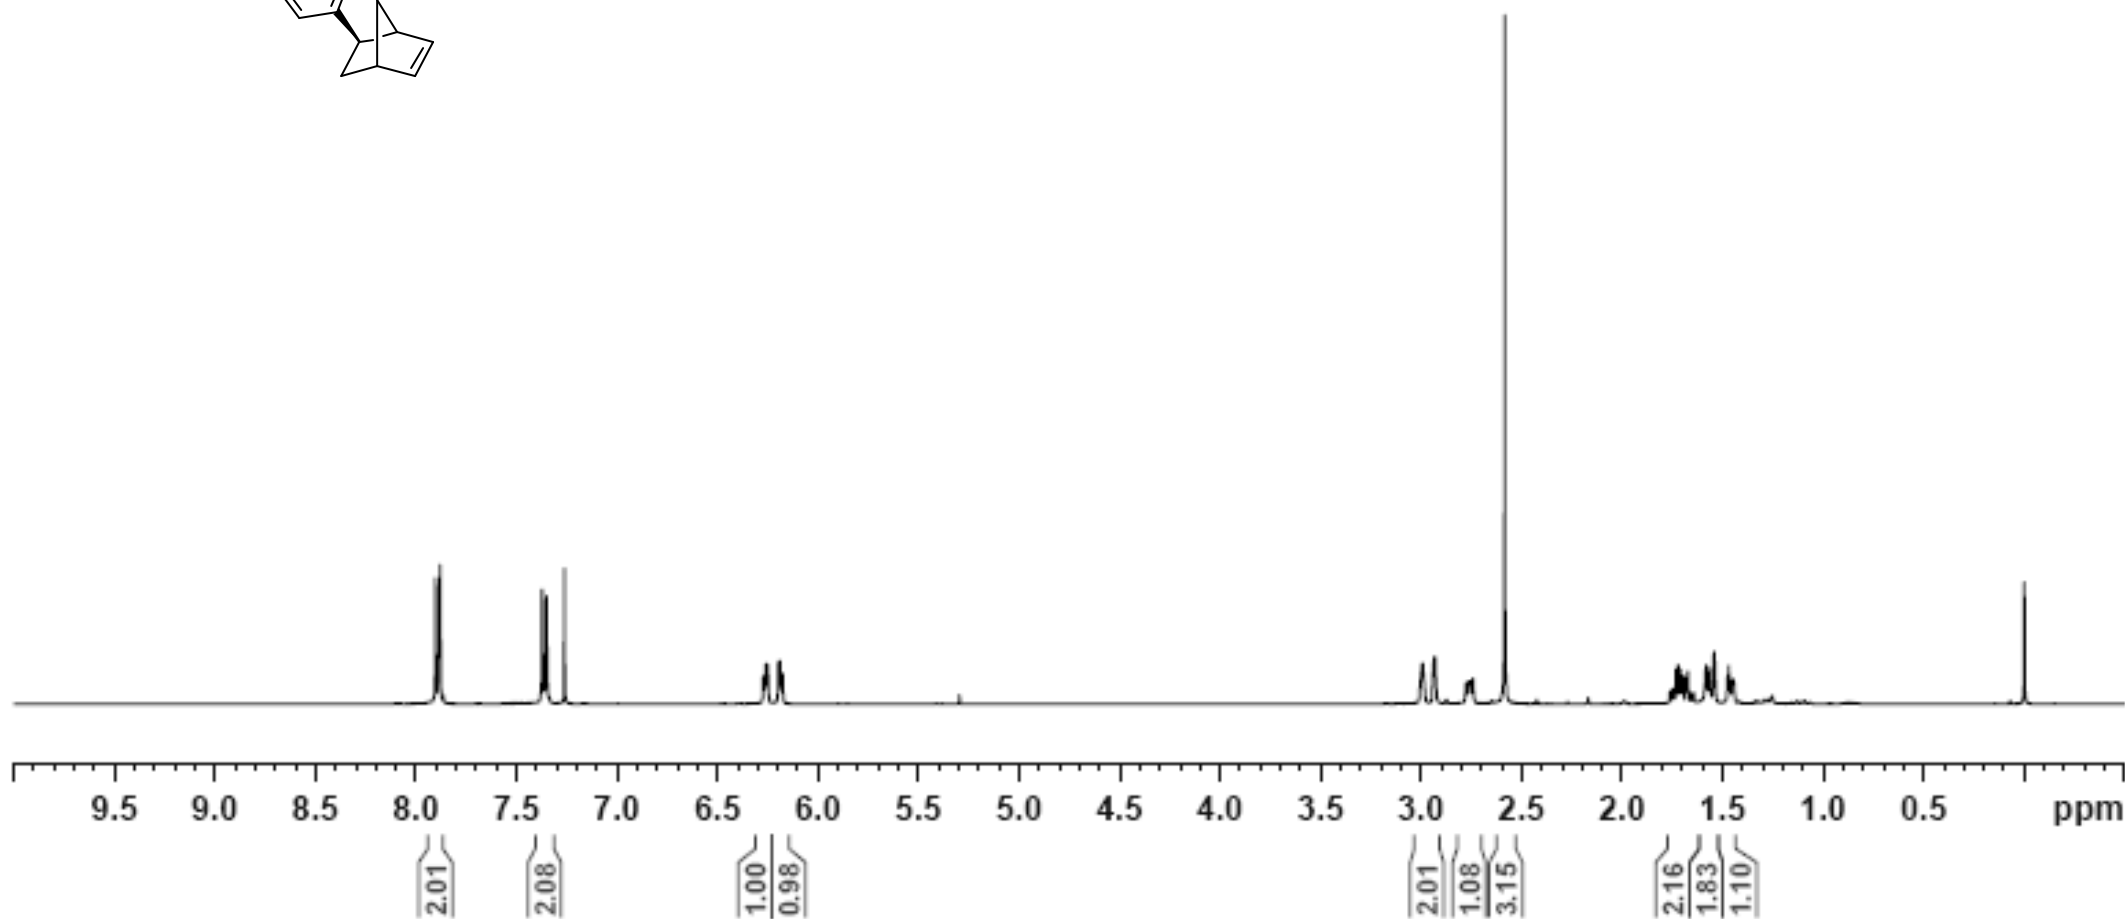

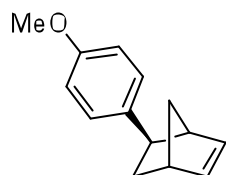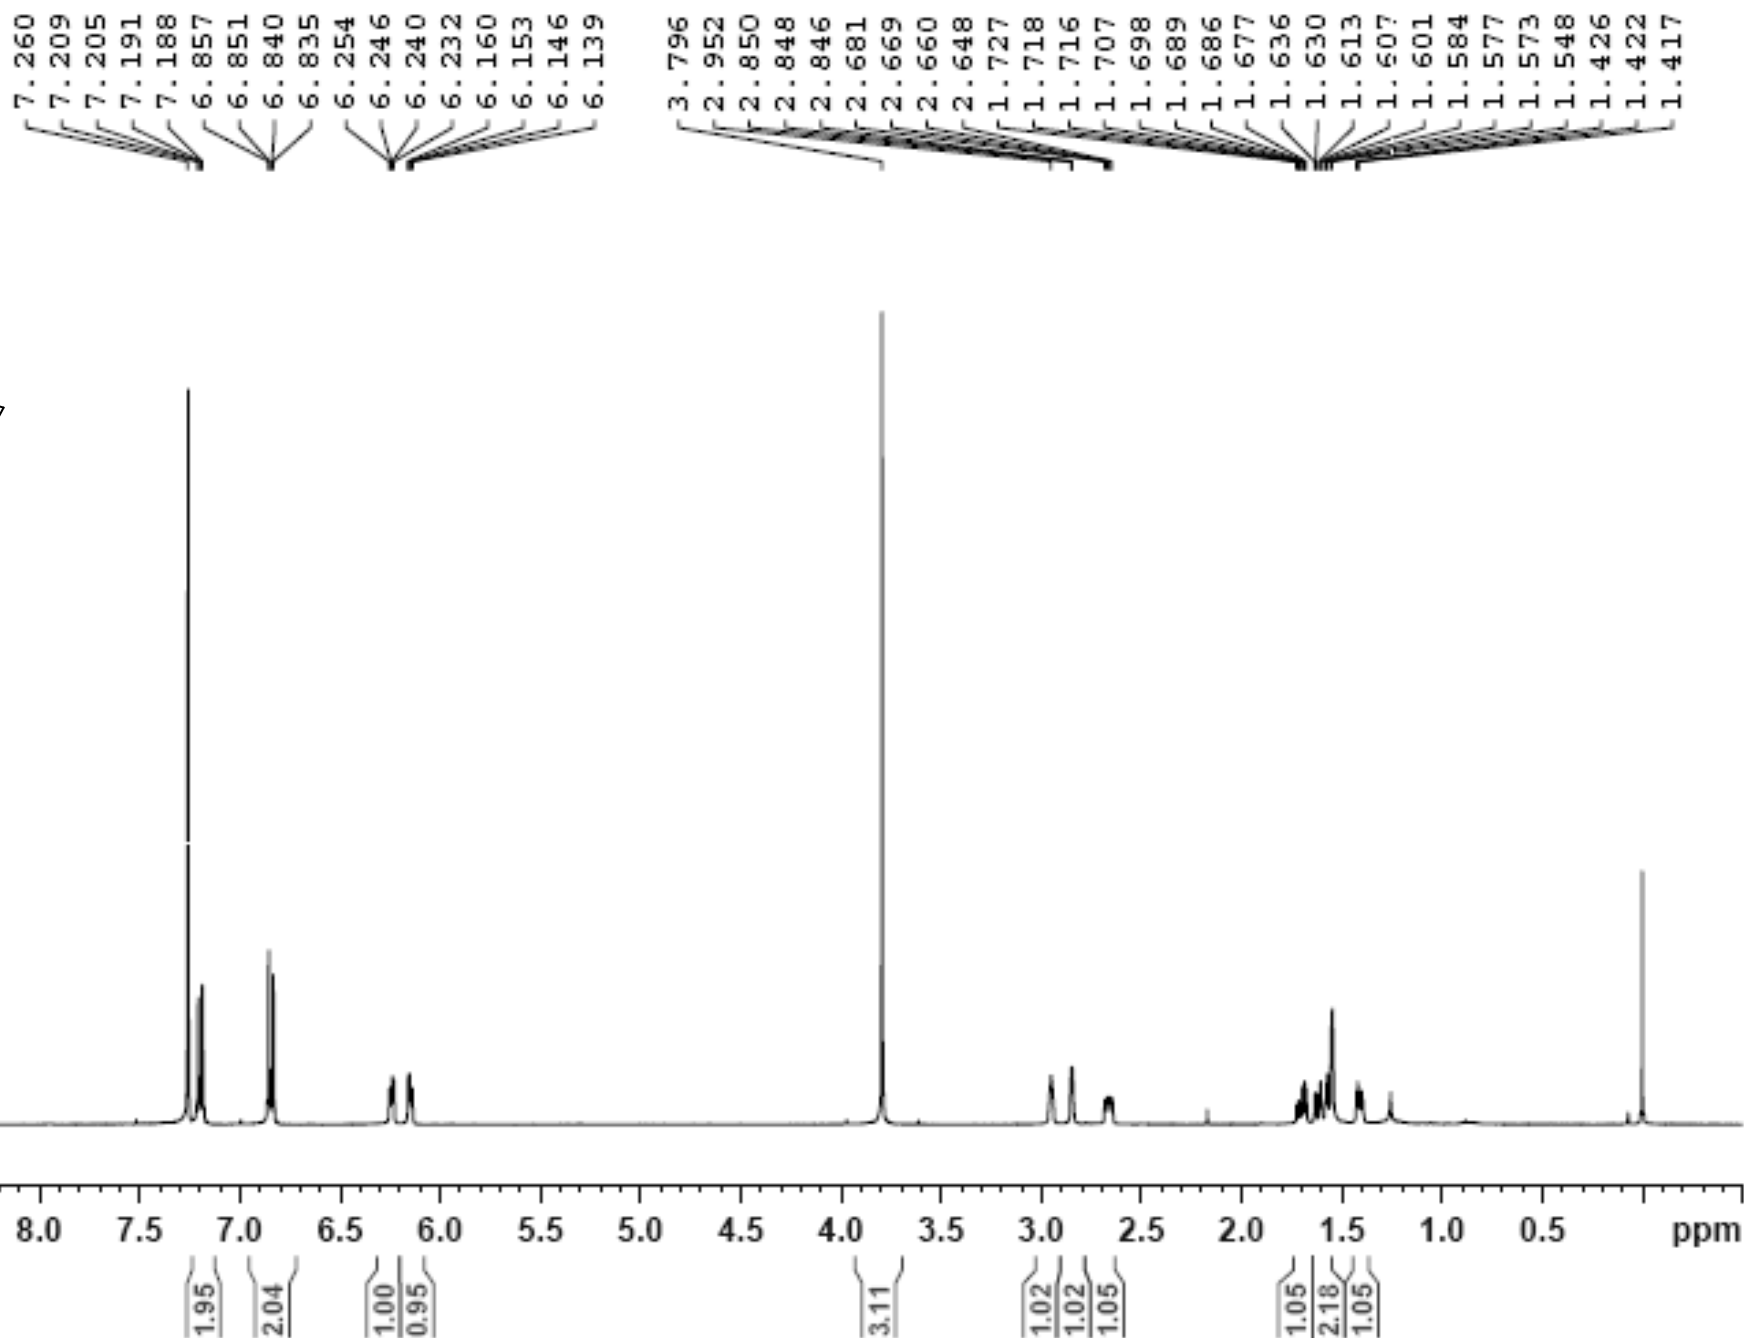

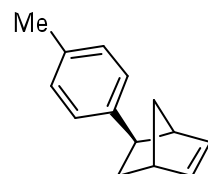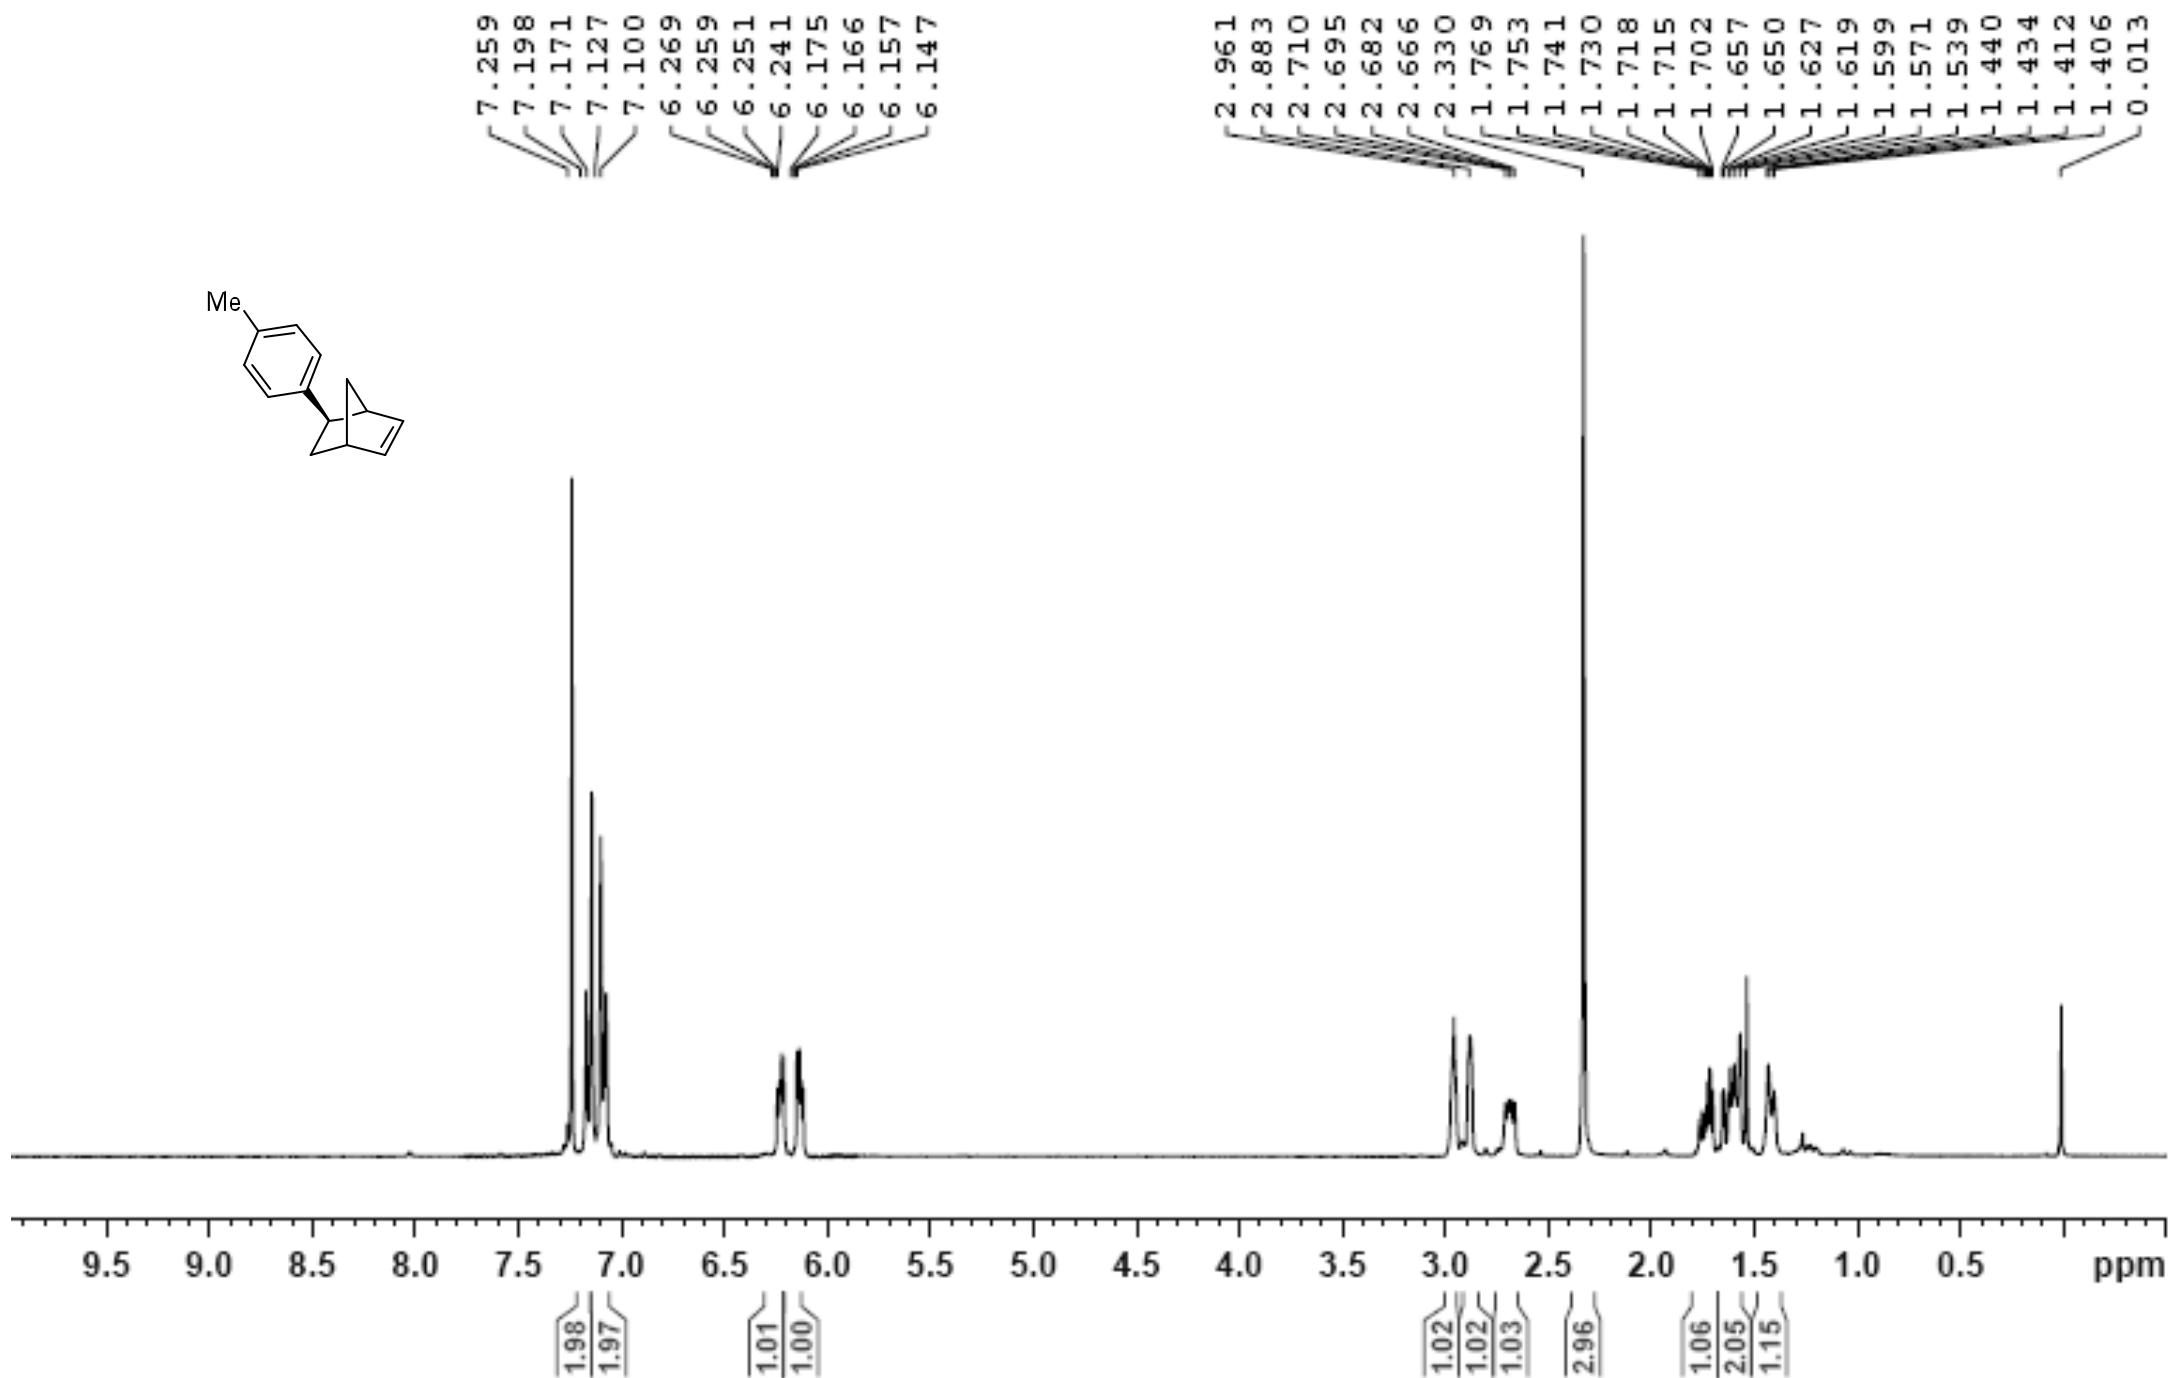

7088 AV300 19 July 2013

S69

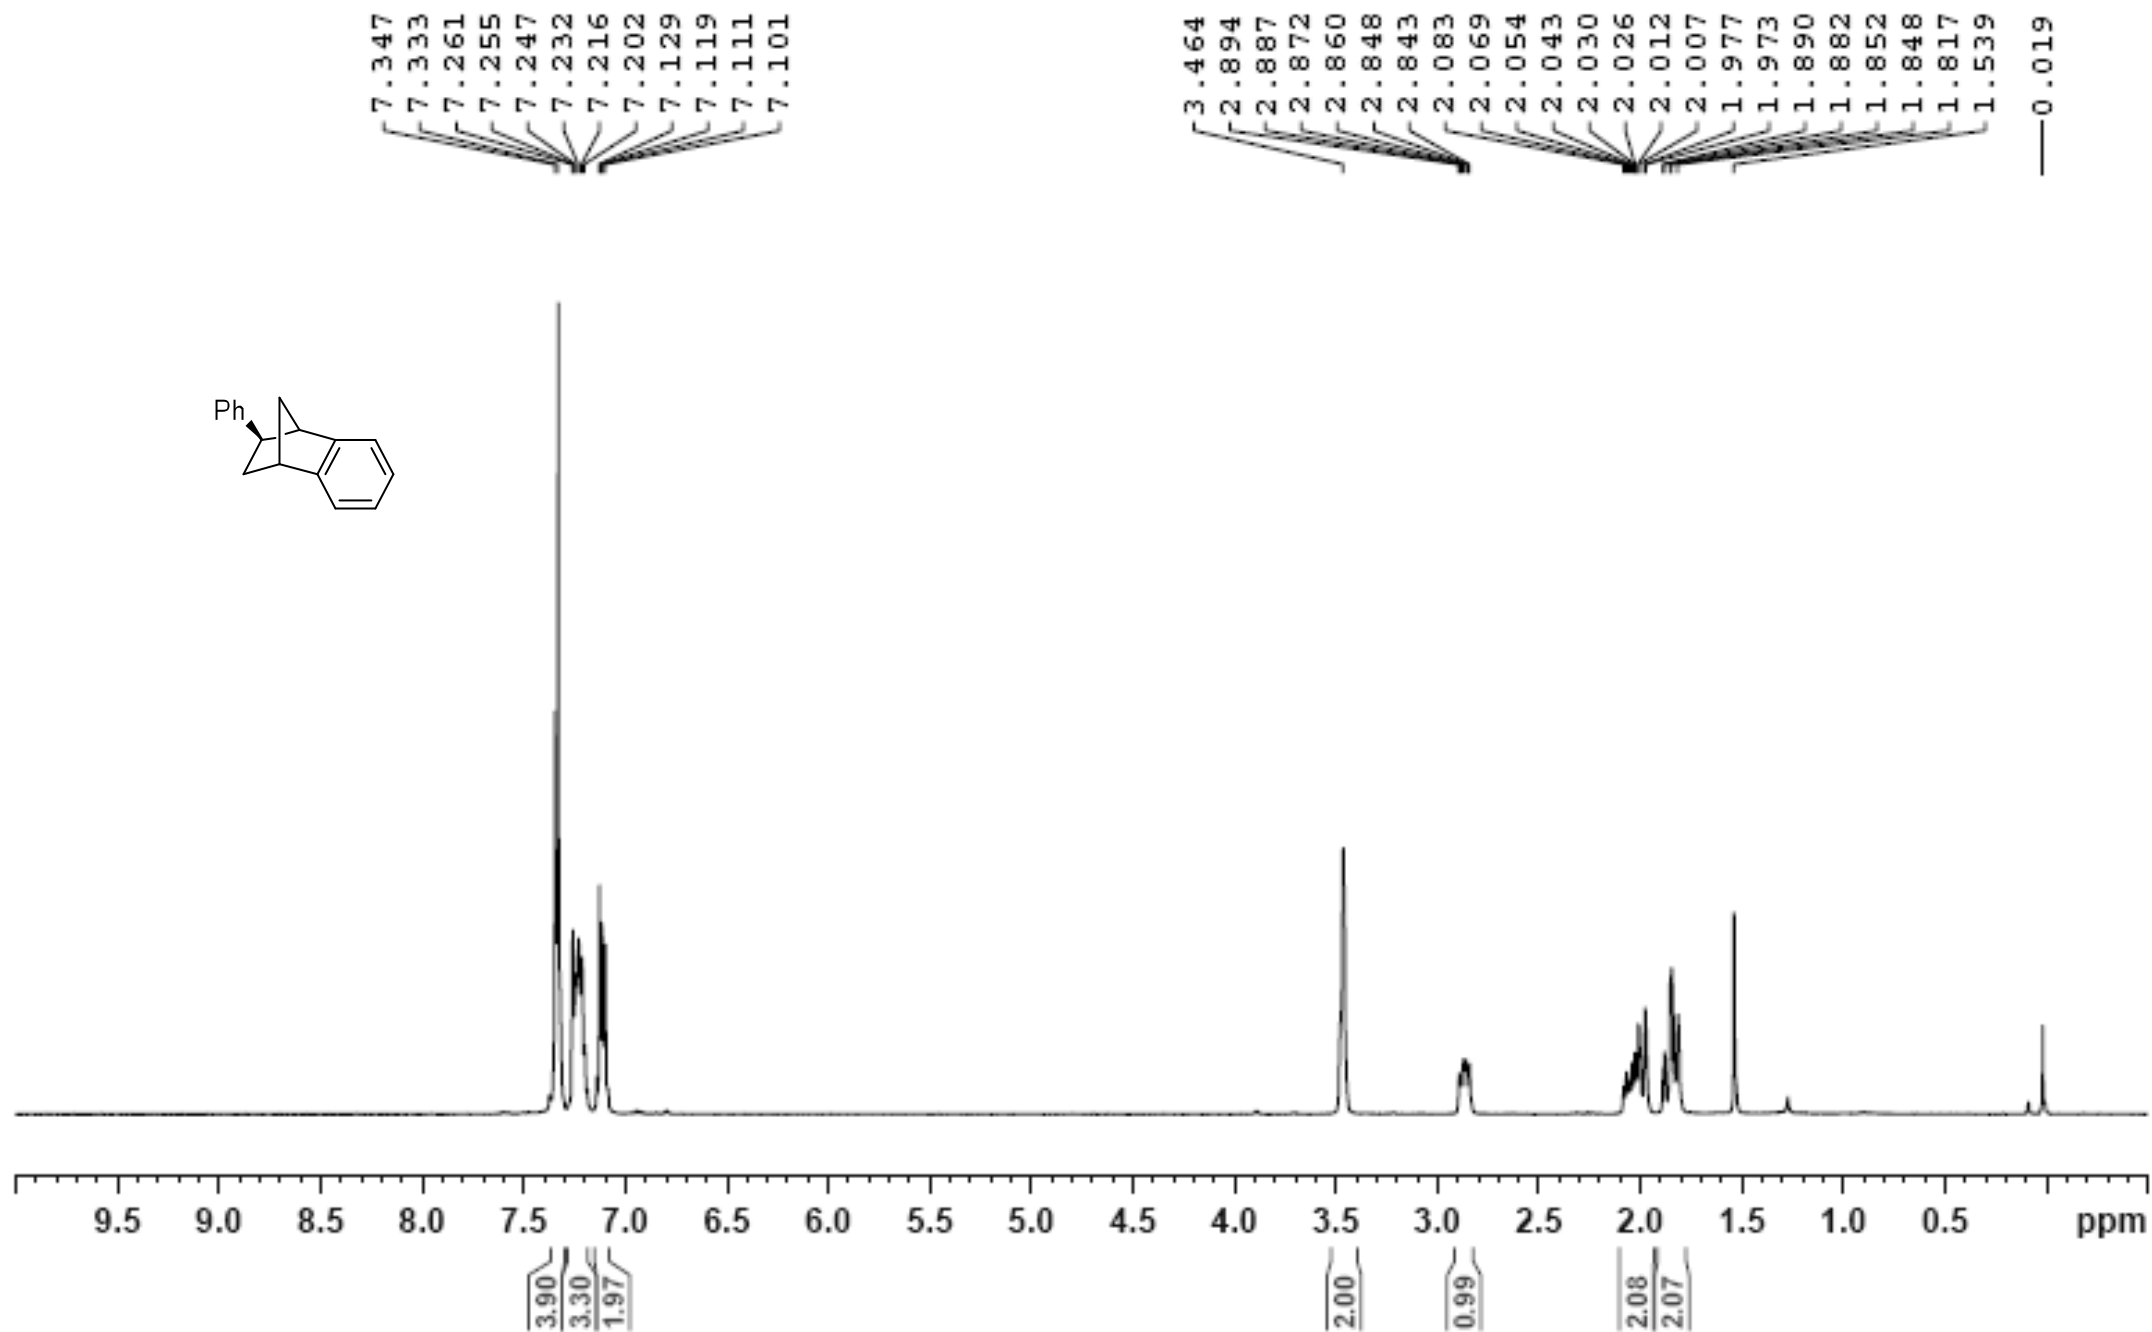

Supplement: c3cc47551d_2.pdf [file c3cc47551d_2.pdf]
